# Supplementary material for: Transcriptome characteristics during cell wall formation of endosperm cellularization and embryo differentiation in Arabidopsis
Source: Front Plant Sci. 2022 Oct 3;13:998664. doi: 10.3389/fpls.2022.998664 (PMC9575994; doi:10.3389/fpls.2022.998664)
Supplement: Supplementary file 7 [file Table_1.xlsx]

## Sheet: Sheet1
Supplementary Table 1 | Primers (5′ to 3′) used in the study
Gene_ID	Gene	Forward Primer (5’→3’)	Reverse Primer (5’→3’)
1.1 Primers for the mutant identification
AT1G80410		TTGCGAGGGTGATCATACAGAGA	TTGCACAAAAAAGAGCCGAAAAT
	CSLB2	GCCTTTTCAGAAATGGATAAATAGC
1.2 Primers for the differentially expressed genes anlysis
AT3G04120	GAPDH	GAGTCTACTGGTGTCTTCACTG	CAAGGTCGGACTTGTATTCGTG
AT1G02730	AtCSLD5-qPCR	TATCCATTCACATCGCTATTCC	TCCTATGACCCAGAACTGCTCGT
AT2G03090	AtEXPA15-qPCR	TGGTGTTGTCCCTGTTTCCTAC	CCAGTTCTGTCCCCAGTTTCTT
AT2G45110	AtEXP4B-qPCR	ACTTCGATCCGCTGGTGTTATAC	GCACTGCCTGAGTTGACCTTCC
AT5G65730	AtXTH6-qPCR	CAGAGCACTGGATGTGGATTTG	AACTGTTTGTTTGCACTGAGTAAGG
AT4G25820	AtXTH14-qPCR	TGTTGTTGTCTCTCCTCCTTGC	ACTCCTTCTTGGATTGAAAACCT
AT2G26440	AtPME12-qPCR	GTCAAACACATAAGCAACTCCCTCT	ATTGGTCATACTCATCATACCCGTC
AT1G11590	AtPME19-qPCR	CCCTCCGTGTGAGTGGTGATA	GAATCGTGAAGCCCGAGTAAAT
AT2G14890	AtAGP9-qPCR	ATCTCCGTCATCTAGCCCACCTCTT	CTCCATTCTGGTCGTTCACATC
AT2G01700	AtAGP17-qPCR	TTGACGGTTACATTGATCTGCA	TGTGGGTTTAGGCTTATGAGGA
AT3G60900	AtFLA10-qPCR	CAATGGCGCAATGTCTTCCCTC	GTTTGGTAAAGCGTGGTGGTGA
AT4G31370	AtFLA5-qPCR	GGGTTGGGTGAACAGATGAATG	TATGGTGGTGGAGGTGGGAAAA
AT2G25540	AtCESA10-qPCR	TCCATCCCGCTCCTCGCCTATT	GCTCGTTCCTCCACCAGTCTTC
AT1G02730	AtCSLD5-qPCR	TATCCATTCACATCGCTATTCC	TCCTATGACCCAGAACTGCTCGT
AT1G73590	AtPIN1-qPCR	CTCAAGGCTTATCTGCGACACC	AGGACCAAAGTTAGAGTTCCGACCA
AT1G19850	AtARF5-qPCR	GAGAGTATGAGTGCTCCTGCTAAAC	CTTGCCTGTTCCATTGACTGC
AT1G27320	AtAHK3-qPCR	ACCCTCTTTTCCTTTCTCCTAA	ATTCCAATACCCAATCCCCT
AT2G19500	AtCKX2-qPCR	TCGGGACTCGCTCTTCTCTAT	CGTGCTCAATCCAATCTTCTTTAC
AT5G17800	AtMYB56-qPCR	CGAGAGAGGTGAAAACGAAAAG	GCCAAGAAGGTGGTTAGAAATC
AT2G31220	AtbHLH10-qPCR	GCATAATGGAGGAATGAATGTTTTG	AGGGATTTGGAATGAGGTTCTTTA
AT1G55600	AtWRKY10-qPCR	CCATTGAGGACAGTGAGAGCGAG	CTTTGGAGGTGGAGGTTGAGC
AT5G60440	AtAGL62-qPCR	CGTAGCAAAGGTCGTCAAAAAATAG	ATGGTGAGGAGGTAGAGGGTTATTG
AT3G63530	AtEOD1-qPCR	TGGTTTCCCTTATGCTGCTACTGG	TTCTCCCTATGGACATCCTCGA
AT3G11260	AtWOX5-qPCR	TTGGCAACAATAACGGAGGAACG	TATTTTACGACGTTTCTGCCTCTCC
AT5G59340	AtWOX2-qPCR	GCTTACTTCAATCGCCTCCTCC	TGGCTGCTGTTGTTCTTATGTCTG
AT3G20840	AtPLT1-qPCR	GCGGAGATGATAGCCCTTGGT	AATGGTTGTTGAATGCTTAGAGGG
AT2G45190	AtFIL-qPCR	TGAGATTCCTAAAGCACCACCC	ATTCTTGGCAGCAGCACTAAA
AT4G37650	AtSHR-qPCR	CCAATACCATCCCGCCACAT	GAGCGTCCATAGGATTTGTTGC
AT4G36920	AtAP2-qPCR	TGGTGTTGCTTCTGGCTTTCCT	CTTGGTCCACGCCGACTCTTTT
AT4G32880	AtATHB8-qPCR	ACATCTGTAATGGAAGACGGGAG	TTTGGGCGAGTAAAGTGGAGG
AT1G12980	AtDRN-qPCR	AGCCGCAACCGCAAACTGTC	ATGCCGTGTCAAATGTTCCGAG
AT5G53950	AtCUC2-qPCR	CATACCTTCTCCGCAAAGTCCTC	CGTGCTCTGTTAGTTCTCAGTCCC
AT1G08465	AtYABBY2-qPCR	ACTTGTGACGGTGAGATGTGGC	GAATGGGAGGAGCTGAGGTTTG
AT5G60690	AtREV-qPCR	CGTGTCTACGCTGAGTGTCCTAA	GCAACCTATCATTCTCCTCCATC
AT4G16780	AtATHB2-qPCR	GGGTTACGAGCAAGACAAGTGG	CGTGGTCAAAGTAGTGGGTGGG
AT1G21970	AtLEC1-qPCR	GACAAACCTATGGAGGAAATGG	CGTAATGGAAGACGAAGAGCC
AT5G43810	AtAGO10-qPCR	AAATCGCTGCTGTTGTTGCTTC	GTTGCCCTTCGCTTACTCCAT
AT3G45610	AtDOF6-qPCR	TGACGGCAAATCATTCCCAAC	ATCTGCTCCATACCGCCTCCA
