# Supplementary material for: Transcriptome characteristics during cell wall formation of endosperm cellularization and embryo differentiation in Arabidopsis
Source: Front Plant Sci. 2022 Oct 3;13:998664. doi: 10.3389/fpls.2022.998664 (PMC9575994; doi:10.3389/fpls.2022.998664)
Supplement: Supplementary file 8 [file Table_2.xlsx]

## Sheet: Sheet1
Supplementary Table 2 | Mapping results of the RNA-Seq reads in Arabidopsis
Sample	Total reads	Total mapped (%)	Multipe mapped (%)	Uniquely mapped (%)
3W_1	52747510	51536036 (97.7)	1344704 (2.55)	50191332 (95.15)
3W_2	48042578	47113201 (98.07)	1052473 (2.19)	46060728 (95.87)
3W_3	51810146	50856737 (98.16)	1166882 (2.25)	49689855 (95.91)
4W_1	44961058	44061742 (98.00)	1057239 (2.35)	43004503 (95.65)
4W_2	53976148	52861009 (97.93)	1427972 (2.65)	51433037 (95.29)
4W_3	48840042	47882120 (98.04)	1240376 (2.54)	46641744 (95.50)
5W_1	52152778	51238357 (98.25)	1282441 (2.46)	49955916 (95.79)
5W_2	48813190	47987200 (98.31)	1123438 (2.30)	46863762 (96.01)
5W_3	57030920	56123034 (98.41)	1383482 (2.43)	54739552 (95.98)
5M_1	45535750	44794782 (98.37)	1149439 (2.52)	43645343 (95.85)
5M_2	54699658	53783602 (98.33)	1316906 (2.41)	52466696 (95.92)
5M_3	49408236	48572058 (98.31)	1127421 (2.28)	47444637 (96.03)
6M_1	46631128	45875126 (98.38)	1009919 (2.17)	44865207 (96.21)
6M_2	57221738	55657934 (97.27)	1299822 (2.27)	54358112 (95.00)
6M_3	49064076	48063676 (97.96)	1146369 (2.34)	46917307 (95.62)
7M_1	48688454	47834132 (98.25)	1477293 (3.03)	46356839 (95.21)
7M_2	50644582	49604642 (97.95)	1269755 (2.51)	48334887 (95.44)
7M_3	54916172	53978236 (98.29)	1412794 (2.57)	52565442 (95.72)
