# Supplementary material for: Transcriptome characteristics during cell wall formation of endosperm cellularization and embryo differentiation in Arabidopsis
Source: Front Plant Sci. 2022 Oct 3;13:998664. doi: 10.3389/fpls.2022.998664 (PMC9575994; doi:10.3389/fpls.2022.998664)
Supplement: Supplementary file 9 [file Table_3.xlsx]

## Sheet: Sheet1
Supplementary Table 3 | The FPKM values of all genes in each library
Gene_id	Gene_name	Gene_description	3W_1	3W_2	3W_3	4W_1	4W_2	4W_3	5W_1	5W_2	5W_3	5M_1	5M_2	5M_3	6M_1	6M_2	6M_3	7M_1	7M_2	7M_3
AT1G01010	NAC001	NAC domain-containing protein 1 [Source:UniProtKB/Swiss-Prot;Acc:Q0WV96]	3.4	4.18	4.51	3.35	3.34	2.59	1.74	1.76	1.72	3.75	4.2	4.4	4.11	4.25	4.36	3.79	3.31	3.5
AT1G01020	ARV1	ARV1 family protein [Source:UniProtKB/TrEMBL;Acc:Q5MK24]	1.15	0.75	0.5	2.96	2.37	2.79	6.78	4.7	5.9	6.84	6.43	5.21	8.75	7.33	7.52	9.79	10.4	9.51
AT1G01030	NGA3	B3 domain-containing transcription factor NGA3 [Source:UniProtKB/Swiss-Prot;Acc:Q9MAN1]	0.05	0.03	0.08	0.17	0.05	0.03	0.37	0.33	0.34	0	0	0	0	0	0	0	0	0
AT1G01040	DCL1	Dicer-like 1 [Source:UniProtKB/TrEMBL;Acc:F4HQG6]	8.58	15.13	15.42	10.78	12.19	12.32	13.4	15.4	13.93	12.58	12.79	13.49	14.26	15.68	14.27	14.99	14.48	15.04
AT1G01046	MIR838A	MIR838a; miRNA [Source:TAIR;Acc:AT1G01046]	0	7.19	0	9.03	0	0	18.56	3.19	0	4.58	4	0	2.49	0	0	0	0	0
AT1G01050	PPA1	Soluble inorganic pyrophosphatase 1 [Source:UniProtKB/Swiss-Prot;Acc:Q93V56]	121.19	100.59	92.94	103.66	110.41	104.38	82.5	86.91	84.91	91.62	85.63	96.29	91.94	90.95	95.82	97.86	98.55	96.01
AT1G01060	LHY	LHY1 [Source:UniProtKB/TrEMBL;Acc:A0A178W761]	8.31	11	10.48	8.95	9.5	9.28	10.99	12.68	11.97	6.52	6.76	6.7	19.08	17.88	19.02	13.77	14.6	13.28
AT1G01070		WAT1-related protein [Source:UniProtKB/TrEMBL;Acc:A0A178WFU3]	0.06	0.16	0.07	0.12	0.03	0	0.43	0.52	0.08	0.49	0.47	0.27	2.23	2.45	2.38	10.99	11.75	10.12
AT1G01080		RNA-binding (RRM/RBD/RNP motifs) family protein [Source:UniProtKB/TrEMBL;Acc:F4HQH8]	19.93	16.54	15.79	23.35	22.38	22.63	21.36	23.17	22.84	11.49	11.95	13.01	12.38	11.06	10.92	12.19	11.46	11.84
AT1G01090	PDH-E1 ALPHA	Pyruvate dehydrogenase E1 component subunit alpha [Source:UniProtKB/TrEMBL;Acc:A0A178W8A7]	123.33	116.75	109.75	195.2	189.04	189.18	370.87	376.12	366.59	184.65	187.72	190.62	232.62	229.32	239.04	242.19	241.76	240.98
AT1G01100	RPP1A	60S acidic ribosomal protein P1-1 [Source:UniProtKB/Swiss-Prot;Acc:Q8LCW9]	679.12	541.74	527.07	707.02	612.38	618.69	523.11	489.65	469.87	387.92	429.1	397.78	343.86	351.32	357.36	334.89	347.7	353.78
AT1G01110	IQD18	IQ-domain 18 [Source:UniProtKB/TrEMBL;Acc:Q9MAM4]	0.69	1.13	0.88	1.2	1.41	1.74	2.16	3.13	2.84	0.26	0.15	0.09	0.27	0.17	0.17	0.05	0.05	0.13
AT1G01120	KCS1	3-ketoacyl-CoA synthase [Source:UniProtKB/TrEMBL;Acc:A0A178W124]	36.46	34.52	32.96	19.91	20.63	20.55	16.13	17.39	16.34	10.25	9.67	9.92	5.31	5.72	5.63	5.83	6.13	6.83
AT1G01130		CONTAINS InterPro DOMAIN/s: CBL-interacting protein kinase (InterPro:IPR020660), Calcium/calmodulin-dependent protein kinase-like (InterPro:IPR020636); BEST Arabidopsis thaliana protein match is: unknown protein (TAIR:AT5G47170.1); Has 176 Blast hit /.../76 proteins in 20 species: Archae - 0; Bacteria - 0; Metazoa - 0; Fungi - 0; Plants - 176; Viruses - 0; Other Eukaryotes - 0 (source: NCBI BLink…	3.97	10.69	8.21	12.43	16.25	18.06	22.62	17.48	17.53	15.34	16.24	10.63	15.32	13.76	15.95	10.68	16.44	15.22
AT1G01140	CIPK9	CBL-interacting protein kinase 9 [Source:TAIR;Acc:AT1G01140]	23.04	28.92	25.62	40.83	43.39	42.92	73.43	79.77	75.96	55.52	56.11	56.73	101.89	97.02	95.28	101.86	108.45	107.93
AT1G01150		Homeodomain-like protein with RING/FYVE/PHD-type zinc finger domain-containing protein [Source:UniProtKB/TrEMBL;Acc:F4HQJ2]	0.04	0.05	0.04	0.34	0.21	0.25	0.58	0.67	0.46	0.37	0.38	0.61	1.13	1.05	1.1	1.79	1.94	2.45
AT1G01160	GIF2	GRF1-interacting factor 2 [Source:UniProtKB/TrEMBL;Acc:F4HQJ3]	74.6	66.02	61.17	78.87	78.87	74.3	59.78	62.24	59.45	71.05	78.59	78.61	75.33	74.24	70.83	77.75	78.35	75.03
AT1G01170		At1g01170 [Source:UniProtKB/TrEMBL;Acc:Q2HIQ2]	48.69	35.19	34.99	51.18	40.29	38.64	54.22	51.5	48.86	29.59	31.53	29.77	30.49	29.68	21.72	35.28	25.3	30.53
AT1G01180		S-adenosyl-L-methionine-dependent methyltransferases superfamily protein [Source:UniProtKB/TrEMBL;Acc:F4HS78]	3.18	2.27	1.62	2.49	3.06	2.59	1.67	1.51	1.4	1.96	2	1.97	1.16	1.44	1.1	1.41	1.39	1.62
AT1G01183	MIR165A	MIR165/MIR165A; miRNA [Source:TAIR;Acc:AT1G01183]	0	0	0	0	0	0	0	0	0	0	0	0	0	0	0	0	0	0
AT1G01190	CYP78A8	CYP78A8 [Source:UniProtKB/TrEMBL;Acc:A0A178WIC4]	0.48	0.16	0.15	0.03	0.2	0.28	0.09	0.06	0.05	0.07	0.03	0	0	0.05	0	0	0	0
AT1G01200	RABA3	RABA3 [Source:UniProtKB/TrEMBL;Acc:A0A178W3F7]	0.13	0	0	0	0.08	0.05	0	0.05	0.04	0.05	0.17	0.09	0.24	0.08	0.09	0.09	0.04	0
AT1G01210		DNA-directed RNA polymerase subunit [Source:UniProtKB/TrEMBL;Acc:Q9LNK0]	33.93	21.83	20.14	25.38	26.62	28.02	18.95	19.18	18.24	27.02	37.3	28.89	27.88	17.8	18.78	17.69	21.73	21.45
AT1G01220	FKGP	Bifunctional fucokinase/fucose pyrophosphorylase [Source:UniProtKB/Swiss-Prot;Acc:Q9LNJ9]	5.98	9.44	10.26	7.36	7.07	8.08	7.66	7.89	8.05	6.72	6.47	7.06	5.52	5.77	5.77	4.44	5.61	5.04
AT1G01225		At1g01225 [Source:UniProtKB/TrEMBL;Acc:Q29PY0]	7.34	7.72	7.46	13.24	10.65	13.22	19.86	17.07	16.74	13.53	14.1	14.51	16.13	15.86	15.92	21.08	18.17	18.49
AT1G01230		ORMDL family protein [Source:UniProtKB/TrEMBL;Acc:Q9C5I0]	73.77	64.33	62.86	76.02	74.16	70.18	69.63	74.01	69.12	72.87	71.6	71.28	66.48	63.18	68.86	63.98	69.42	75.21
AT1G01240		At1g01240/F6F3_11 [Source:UniProtKB/TrEMBL;Acc:Q9LNJ7]	7.29	7.52	8.56	12.74	12.3	11.21	12.02	12.49	12.22	13.06	16.06	14.31	14.1	14.76	14.25	21.72	19.93	19.61
AT1G01250	ERF023	Ethylene-responsive transcription factor ERF023 [Source:UniProtKB/Swiss-Prot;Acc:Q1ECI2]	0.95	0.71	0.86	1.05	0.7	0.76	0.97	0.66	1.36	0.45	0.37	0.21	0.37	0.85	0.21	0.92	0.27	1.26
AT1G01260	BHLH13	Transcription factor bHLH13 [Source:UniProtKB/Swiss-Prot;Acc:Q9LNJ5]	7.38	10.28	8.58	9.84	11.04	11.63	15.76	16.23	14.83	17.25	18.48	19.54	18.09	16.94	18.31	17.38	17.5	18.33
AT1G01270		pre-tRNA [Source:TAIR;Acc:AT1G01270]	0	0	0	0	0	0	0	0	0	0	0	0	0	0	0	0	0	0
AT1G01280	CYP703A2	CYP703A2 [Source:UniProtKB/TrEMBL;Acc:A0A178WMS1]	0	0	0.03	0	0	0	0.03	0	0	0	0.06	0.1	0.1	0.34	0.16	0.03	0.35	0.23
AT1G01290	CNX3	Cyclic pyranopterin monophosphate synthase, mitochondrial [Source:UniProtKB/Swiss-Prot;Acc:Q39056]	16.94	17.62	15.65	17.27	17.83	15.4	12.43	13.29	12.78	21.4	21.14	19.44	18.2	17.29	17.68	17.96	18.34	16.88
AT1G01300	APF2	Aspartyl protease family protein 2 [Source:UniProtKB/Swiss-Prot;Acc:Q9LNJ3]	93.18	80.14	81	58.73	56.09	53.37	53.01	58.37	54.9	24.01	23.97	25.91	33.98	34.1	32.73	26.64	26.22	27.16
AT1G01305		Putative uncharacterized protein [Source:UniProtKB/TrEMBL;Acc:Q1G401]	0.22	0	0	0	0.34	0	0.11	0	0	0	0	0.5	0	0	0	0.12	0.24	0
AT1G01310		At1g01310 [Source:UniProtKB/TrEMBL;Acc:Q6ID87]	0.5	0.38	0.52	0.53	0.33	0.36	0	0	0.31	0.33	0.55	0.68	0.13	0.69	0.18	0.31	0.77	0.33
AT1G01320		Tetratricopeptide repeat (TPR)-like superfamily protein [Source:UniProtKB/TrEMBL;Acc:F4HS99]	7.27	13.73	14.12	11.07	13.52	13.56	24.02	28.42	26.96	17.73	17.61	19.97	20.66	22.85	21.08	16.52	16.09	17.53
AT1G01335	AREP1	Auxin-responsive endogenous peptide 1 [Source:UniProtKB/Swiss-Prot;Acc:P0DKH9]	0	0	0	0	0	0	0	0	0	0	0	0	0	0	0	0	0	0
AT1G01340	CNGC10	Probable cyclic nucleotide-gated ion channel 10 [Source:UniProtKB/Swiss-Prot;Acc:Q9LNJ0]	0.65	0.81	0.86	0.54	0.49	0.53	2.37	1.98	2.33	0.62	0.51	0.53	1.78	1.66	1.47	3.18	3.02	2.64
AT1G01350		Zinc finger CCCH domain-containing protein 1 [Source:UniProtKB/Swiss-Prot;Acc:Q8GX84]	28.57	28.36	26.88	30.89	28	28.57	24.52	25.85	22.86	34.51	34.36	33.44	35.18	32.29	34.13	33.79	30.66	32.25
AT1G01355		Putative endonuclease or glycosyl hydrolase [Source:UniProtKB/TrEMBL;Acc:F4HSA3]	2.85	1.08	1.18	2.1	2.04	2.6	1.19	1.18	0.79	3.68	5.69	5.03	6.1	4.06	4.45	5.23	4.45	3.88
AT1G01360	PYL9	RCAR1 [Source:UniProtKB/TrEMBL;Acc:A0A178W4H4]	11.06	12.79	12.17	12.86	13.19	15.26	20.28	19.02	19.07	9.01	7.35	8.97	8.15	7.94	7.01	7.67	7.55	6.45
AT1G01370	HTR12	Histone H3-like centromeric protein HTR12 [Source:UniProtKB/Swiss-Prot;Acc:Q8RVQ9]	19.93	15.33	13.97	20.09	16.6	17.5	13.31	15.59	15.39	18.34	18.27	15.89	16.54	15.07	15.3	15.11	13.9	14.72
AT1G01380	ETC1	MYB-like transcription factor ETC1 [Source:UniProtKB/Swiss-Prot;Acc:Q9LNI5]	0.08	0	0.17	0.67	0.6	0.51	0.72	1.44	0.82	0.19	0	0.54	2.11	1.93	1.43	3.98	4.45	3.98
AT1G01390		UDP-Glycosyltransferase superfamily protein [Source:TAIR;Acc:AT1G01390]	0.03	0	0.1	0.18	0	0.06	0.05	0.03	0.1	0.09	0	0.03	0	0.05	0.08	0.09	0.03	0.08
AT1G01400		F6F3.20 protein [Source:UniProtKB/TrEMBL;Acc:Q9LNI3]	0	0	0	0	0	0	0	0	0	0	0	0	0	0	0	0	0	0
AT1G01410	APUM22	Putative pumilio homolog 22 [Source:UniProtKB/Swiss-Prot;Acc:Q9LNI2]	0	0	0	0	0	0	0	0	0	0	0	0	0	0	0	0	0	0
AT1G01420	UGT72B3	UDP-glucosyl transferase 72B3 [Source:TAIR;Acc:AT1G01420]	3.13	4.2	3.21	2.01	2.11	2.64	3.04	2.21	2.57	0.97	0.63	0.62	0.65	0.91	1.13	0.6	0.67	0.48
AT1G01430	TBL25	Mannan O-acetyltransferase 3 [Source:UniProtKB/TrEMBL;Acc:A0A346P850]	50.96	47.48	46.38	28.68	28	27.32	17.12	17.49	15.13	13.14	14.12	13.58	12.18	12.17	12.27	10.58	11.27	10.5
AT1G01440		At1g01440 [Source:UniProtKB/TrEMBL;Acc:Q6NQ63]	3.42	4.52	4.67	2.96	3.64	4.05	4.43	4.32	4.4	4.66	4.63	5.24	4.69	4.12	4.88	4.29	4.57	4.28
AT1G01448		other RNA [Source:TAIR;Acc:AT1G01448]	5.69	6.63	6.78	6.11	6.28	6.38	6.01	6.84	6.04	9.68	8.96	10.54	9.57	9.65	10.11	10.68	10.79	10.01
AT1G01450		Protein kinase superfamily protein [Source:UniProtKB/TrEMBL;Acc:F4HSB4]	0.06	0.16	0	0	0	0.27	0.19	0	0	0.59	0.2	0	0.31	0.48	0.37	0.28	0.27	0.37
AT1G01453		unknown protein; FUNCTIONS IN: molecular_function unknown; INVOLVED IN: biological_process unknown; LOCATED IN: cellular_component unknown; BEST Arabidopsis thaliana protein match is: unknown protein (TAIR:AT4G01110.1); Ha. [Source:TAIR;Acc:AT1G01453]	0	0	0	0	0	0	0	0	0	0	0	0	0	0	0	0	0	0
AT1G01460	PIP5K10	Phosphatidylinositol 4-phosphate 5-kinase 10 [Source:UniProtKB/Swiss-Prot;Acc:Q9LMN1]	0.03	0.14	0	0.06	0	0	0.03	0	0.05	0.03	0.05	0.03	0.03	0.05	0	0.06	0.05	0.1
AT1G01470	LEA14	LSR3 [Source:UniProtKB/TrEMBL;Acc:A0A178W160]	10.12	9.18	10.18	18.55	19.36	18.42	64.61	59.99	62.12	10.11	8.26	10.05	28.8	28.04	30.29	14.43	14.74	15.67
AT1G01480	ACS2	1-aminocyclopropane-1-carboxylate synthase 2 [Source:UniProtKB/Swiss-Prot;Acc:Q06402]	0.49	0.47	1.08	0.52	0.51	0.77	0.64	0.33	0.43	1.97	1.79	1.75	1.01	1.14	0.91	0.71	0.51	0.56
AT1G01490		Heavy metal transport/detoxification superfamily protein [Source:TAIR;Acc:AT1G01490]	2.44	2.05	1.78	3.67	3.4	3.05	10.01	8.24	7.2	6.19	7.4	6.63	7.46	7.31	7.04	13.13	10.79	10.61
AT1G01500		Uncharacterized protein At1g01500 [Source:UniProtKB/Swiss-Prot;Acc:Q8GUH2]	19.43	20.58	20.36	23.91	22.09	22.15	31.66	32.74	31.84	23.23	23.4	22.75	29.09	29.87	31.44	26.41	25.01	26.34
AT1G01510	AN	C-terminal binding protein AN [Source:UniProtKB/Swiss-Prot;Acc:O23702]	21.07	26.7	26.66	19.61	23.43	21.85	30.53	32.43	32.62	27.47	27.97	27.94	32.65	31.91	32.23	28.57	27.81	29.64
AT1G01520		ASG4 [Source:UniProtKB/TrEMBL;Acc:A0A384LJW3]	1.4	1.5	1.58	1.41	2.17	1.72	1.62	1.74	1.4	0.84	1.11	1.3	1.78	1.83	1.25	1.77	1.1	1.43
AT1G01530	AGL28	AGL28 [Source:UniProtKB/TrEMBL;Acc:A0A178WE04]	13.11	10.96	9.9	11.37	9.11	9.53	0.65	1.42	1.43	14.67	16.48	13.36	6.6	4.39	7.38	3.04	4.52	3.28
AT1G01540		Probable serine/threonine-protein kinase At1g01540 [Source:UniProtKB/Swiss-Prot;Acc:Q3EDL4]	15.58	16.71	15.79	15.93	16.01	16.65	39.52	40.69	39.73	46.99	47.38	49.93	44.4	43.07	42.89	35.39	35.42	36.2
AT1G01550	BPS1	Protein BPS1, chloroplastic [Source:UniProtKB/Swiss-Prot;Acc:Q9LMM6]	131.23	121.19	120.28	114.48	111.07	110.53	101.3	108.5	99.73	91.51	92.71	92.15	85.8	87.52	91.25	93.42	84.73	91.37
AT1G01560	MPK11	Mitogen-activated protein kinase 11 [Source:UniProtKB/Swiss-Prot;Acc:Q9LMM5]	0.12	0.27	0.12	0.21	0.32	0.18	0.06	0.36	0.19	0.04	0.17	0.1	0.17	0.17	0.22	0.2	0.12	0.19
AT1G01570		F22L4.11 protein [Source:UniProtKB/TrEMBL;Acc:Q9LMM4]	5.62	5.27	4.26	1.76	1.12	1.49	0.62	0.61	0.41	0.75	1.29	0.91	0.5	0.7	0.65	1.03	0.68	0.58
AT1G01580	FRO2	ferric reduction oxidase 2 [Source:TAIR;Acc:AT1G01580]	0	0.02	0	0.02	0	0.02	0	0.04	0	0.02	0.03	0	0.04	0	0.02	0.09	0.07	0.05
AT1G01590	FRO1	Probable ferric reduction oxidase 1 [Source:UniProtKB/Swiss-Prot;Acc:Q9LMM2]	0.85	1.07	0.84	0.76	1.01	1.09	0.34	0.34	0.27	0.48	0.93	0.86	0.45	0.45	0.45	0.32	0.4	0.33
AT1G01600	CYP86A4	Cytochrome P450 86A4 [Source:UniProtKB/Swiss-Prot;Acc:Q9LMM1]	17.94	15.28	15.14	11.12	13.39	13.05	8.34	8.6	7.32	8.35	7.71	7.89	5.46	6.08	5.23	3.11	3.2	3.87
AT1G01610	GPAT4	GPAT4 [Source:UniProtKB/TrEMBL;Acc:A0A178W9F8]	116.08	104.84	106.65	78.35	78.19	80.36	57.2	64.79	59.03	60.48	62.12	65.7	26.83	28.92	28.02	29.72	28.02	29.9
AT1G01620	PIP1-3	TMP-B [Source:UniProtKB/TrEMBL;Acc:A0A178WIA6]	12.22	10.5	11.72	32.87	34.04	33.43	97.11	104.02	99.82	29.93	27.33	29.72	80.89	77.41	74.35	86.44	80.82	85.64
AT1G01630		Polyphosphoinositide binding protein, putative [Source:UniProtKB/TrEMBL;Acc:Q9LQ96]	16.67	17.53	16.09	16.58	20.73	20.24	21.59	22.15	21.26	26.8	25.11	29.44	33.85	33.95	32.91	36.7	35.05	34.06
AT1G01640		BTB/POZ domain-containing protein At1g01640 [Source:UniProtKB/Swiss-Prot;Acc:Q9LQ95]	8.54	6.56	7	8.98	8.76	7.45	5.37	5.91	5.53	20.34	18.68	18.87	22.66	18.86	19	20.5	19.49	20.05
AT1G01650	SPPL4	Signal peptide peptidase-like 4 [Source:UniProtKB/Swiss-Prot;Acc:Q0WMJ8]	29.73	31.8	30.8	28.24	31.44	29.68	25.81	27.44	25.55	27.57	25.41	27.93	21.96	22.14	21.69	21.13	23.76	21.23
AT1G01660		RING/U-box superfamily protein [Source:TAIR;Acc:AT1G01660]	4.49	3.66	3.16	3.79	3.29	3.37	2.22	2.29	2	1.36	1.87	1.91	1.86	1.67	1.42	1.66	1.91	1.61
AT1G01670	PUB56	U-box domain-containing protein 56 [Source:UniProtKB/Swiss-Prot;Acc:Q8GXQ7]	9.13	7.34	6.7	8.09	4.78	6.57	3.62	3.3	4.05	5.18	4.47	4.42	3.62	3.92	4.41	4.18	3.6	3.62
AT1G01680	PUB54	U-box domain-containing protein 54 [Source:UniProtKB/Swiss-Prot;Acc:Q9LQ92]	0	0	0	0	0	0	0	0	0	0	0.04	0	0.35	0.21	0	0	0.05	9.64
AT1G01690	ATPRD3	Putative recombination initiation defects 3 [Source:UniProtKB/TrEMBL;Acc:F4HU48]	3.92	5.75	6.1	10.42	8.56	9.56	10.2	10.62	9.22	8.4	8.98	8.55	12.14	13.02	12.74	10.87	11.04	12.56
AT1G01695		TRM33 [Source:UniProtKB/TrEMBL;Acc:A0A178WAP9]	1.32	1.02	1.21	1.12	0.8	1.25	0.76	0.93	1.07	1.34	1.63	1.44	1.29	1.15	1.07	1.39	1.43	1.04
AT1G01700	ATROPGEF2	RHO guanyl-nucleotide exchange factor 2 [Source:TAIR;Acc:AT1G01700]	0.29	0.21	0.17	0.11	0.23	0.11	0.31	0.32	0.25	0.03	0.15	0.24	0.18	0.18	0.09	0.17	0.13	0.07
AT1G01710		Acyl-CoA thioesterase II [Source:UniProtKB/TrEMBL;Acc:F4HU51]	47.49	49.62	47.88	44.19	46.02	43.45	33.85	32.64	34.59	39.4	37.57	40.22	30.78	33.11	33.88	33.94	34.25	34.45
AT1G01715		-	15.53	12.11	11.1	13.45	10.47	9.47	6.71	7.58	6.19	11.81	10.8	12.33	8.62	7.86	8.26	8.27	6.77	8.22
AT1G01720	NAC002	NAC domain-containing protein 2 [Source:UniProtKB/Swiss-Prot;Acc:Q39013]	65.86	58.4	58.45	72.11	79.55	79.2	45.13	46	47.52	35.57	37.25	37.27	39.41	39.27	38.45	48.46	47.4	48.12
AT1G01725		Adenylosuccinate synthetase [Source:UniProtKB/TrEMBL;Acc:Q9LQ84]	29.62	25.15	23	26.29	26.25	27.12	20.3	18.66	18.59	25.28	20.93	25.93	27.81	24.54	23.61	26.12	37.47	36.9
AT1G01730		T1N6.14 protein [Source:UniProtKB/TrEMBL;Acc:Q9LQ83]	39.9	32.91	35.18	40.94	44.55	45.53	35.17	36.68	33.04	44.03	45.13	41.56	50.49	52.14	52.19	48.08	46.81	47.17
AT1G01740	BSK4	Serine/threonine-protein kinase BSK4 [Source:UniProtKB/Swiss-Prot;Acc:F4HU55]	2.14	2.6	3.28	2.12	2.6	1.86	2.99	2.35	2.75	2.61	1.96	2.38	1.67	1.98	1.89	2.31	2.31	2.36
AT1G01750	ADF11	actin depolymerizing factor 11 [Source:TAIR;Acc:AT1G01750]	0.42	0.35	0	0.29	0.77	0.34	0.95	0.54	0.76	1.09	0.43	0.34	0.88	1.04	0.73	0.81	1.29	0.63
AT1G01760		TAD1 [Source:UniProtKB/TrEMBL;Acc:A0A178W782]	1.65	2.64	3.12	2.15	2.89	2.92	2.96	2.26	3.79	2.4	2.98	2.86	2.32	2.41	1.81	2.14	2.13	2.72
AT1G01770		Propionyl-CoA carboxylase [Source:UniProtKB/TrEMBL;Acc:Q8GZ85]	3.58	7.1	7.07	5.51	8.07	8.59	8.9	9.87	9.55	8.04	7.9	8.04	9.39	10.51	10.32	12.11	13.9	10.8
AT1G01780	PLIM2B	LIM domain-containing protein PLIM2b [Source:UniProtKB/Swiss-Prot;Acc:Q1ECF5]	9.6	7.75	6.85	10.7	8.85	8.74	9.15	9.4	9.45	7.42	7.47	10.07	9.24	10.01	9.43	13.23	12.64	13.8
AT1G01790	KEA1	K(+) efflux antiporter 1, chloroplastic [Source:UniProtKB/Swiss-Prot;Acc:Q9ZTZ7]	3.68	6.01	5.73	4.94	5.77	5.91	8.65	8.65	8.04	4.55	4.56	5.48	4.34	4.13	4.64	3.26	3.38	3.42
AT1G01800		AT1G01800 protein [Source:UniProtKB/TrEMBL;Acc:Q94K30]	6.25	4.92	4.71	11.24	9.29	10.4	14.56	14.64	15.66	17.9	18.04	17.58	21	17.87	18.02	21.77	21.37	18.79
AT1G01810		T1N6.23 [Source:UniProtKB/TrEMBL;Acc:Q9LQ74]	4.75	4.5	3.96	8.03	5.64	6.2	2.8	4.75	3.34	11.17	8.15	9.65	9.43	8.03	9.34	7.48	8.97	8.64
AT1G01820	PEX11C	Peroxisomal membrane protein 11C [Source:UniProtKB/Swiss-Prot;Acc:Q9LQ73]	43.59	40.36	44.51	49.34	46.65	47.95	40.08	39.18	38.84	39.84	43.58	40.61	38.65	36.17	35.91	40.5	38.04	37.23
AT1G01830		ARM repeat superfamily protein [Source:UniProtKB/TrEMBL;Acc:Q93YW3]	28.18	29.02	28.9	32.54	33.93	32.88	37.19	37.06	37.24	25.14	23.6	23.84	29.6	29.89	29.64	26.89	26.13	27.02
AT1G01840		AP2-like ethylene-responsive transcription factor SNZ [Source:UniProtKB/TrEMBL;Acc:Q9LQ71]	3.44	1.95	3.37	5.45	2.15	2.86	2.36	2.08	3.04	2.16	1.75	2.65	1.93	1.69	2.01	1.46	3.5	2.86
AT1G01860	PFC1	rRNA adenine N(6)-methyltransferase [Source:UniProtKB/TrEMBL;Acc:A0A178WMV6]	7.69	8.25	8.56	10.31	10.54	12.21	12.25	11.96	12.4	10.56	9.84	8.68	16.07	12.29	11.09	12.37	12.99	12.48
AT1G01870		pre-tRNA [Source:TAIR;Acc:AT1G01870]	0	0	0	0	0	0	0	0	0	0	0	0	0	0	0	0	0	0
AT1G01880	GEN1	Flap endonuclease GEN-like 1 [Source:UniProtKB/Swiss-Prot;Acc:Q9LPD2]	2.97	3.87	3.97	4.5	3.5	4.08	4.55	5.09	5.42	4.9	4.9	5.05	4.13	4.54	4.92	5.52	4.41	5.81
AT1G01890		pre-tRNA [Source:TAIR;Acc:AT1G01890]	0	0	0	0	0	0	0	0	0	0	0	0	0	0	0	0	0	0
AT1G01900	SBTI1.1	SBTI1.1 [Source:UniProtKB/TrEMBL;Acc:A0A178W900]	1.11	1.64	1.94	10.6	11.3	12.08	62.84	64.03	60.01	32.5	34.22	35.97	201.24	211.7	209.67	376.78	371.51	384.01
AT1G01910		ATPase [Source:UniProtKB/TrEMBL;Acc:A0A178WPT5]	43.79	45.85	44.29	41.14	44.76	46.37	48.36	52.95	52.05	62.81	61.04	68.47	63.69	62.9	68.52	63.32	59.29	63.71
AT1G01920		SET domain-containing protein [Source:UniProtKB/TrEMBL;Acc:F4HU79]	19.96	18.38	18.07	18.83	17.31	17.17	12.52	14.44	13.23	24.11	24.22	25.55	20.88	19.79	19.57	18.82	16.93	17.79
AT1G01930		F22M8.6 protein [Source:UniProtKB/TrEMBL;Acc:Q9LPC8]	9.19	12.62	11.61	12.33	13	11.75	10.71	11.42	12.13	17.41	17.02	16.85	15.76	15.85	15.62	14.84	13.66	15.18
AT1G01940	CYP18-1	Peptidyl-prolyl cis-trans isomerase CYP18-1 [Source:UniProtKB/Swiss-Prot;Acc:Q9LPC7]	38.21	32.04	32.53	38.71	39.07	41.42	34.76	32.69	34.32	51.3	53.87	52.71	48.22	44.7	48.82	50.55	55.05	53.87
AT1G01950	ARK2	Kinesin-like protein [Source:UniProtKB/TrEMBL;Acc:F4HU83]	11.64	13.5	12.54	14.93	15.16	15.39	17.38	19.99	18.61	15.18	15.84	15.64	18.76	18.16	17.61	16.6	15.74	16.92
AT1G01960	BIG3	Brefeldin A-inhibited guanine nucleotide-exchange protein 3 [Source:UniProtKB/Swiss-Prot;Acc:Q9LPC5]	11.74	24.53	24.42	14.6	17.7	16.88	23.66	26.99	24.56	26.03	27.58	28.11	31.34	33.55	32.51	30.47	30.04	29.19
AT1G01970		Pentatricopeptide repeat-containing protein At1g01970 [Source:UniProtKB/Swiss-Prot;Acc:Q9LPC4]	11.78	11.81	10.95	16.6	14.2	13.58	15.92	15.83	13.97	15.13	14.52	13.75	15	14.28	15.27	16.01	14.59	14.21
AT1G01980	SEC1A	Berberine bridge enzyme-like 1 [Source:UniProtKB/Swiss-Prot;Acc:Q9LPC3]	0.65	0.53	0.39	0.34	0.24	0.21	0.05	0.21	0.09	0.03	0.05	0.03	0.08	0.09	0.08	0.08	0.13	0.12
AT1G01990		At1g01990 [Source:UniProtKB/TrEMBL;Acc:Q9LPC2]	21.79	18.84	22.79	19.41	19.91	19.49	18.27	19.69	17.95	12.34	13.31	15.87	13.56	12.64	11.83	11.13	11.83	13.89
AT1G02000	GAE2	UDP-glucuronate 4-epimerase 2 [Source:UniProtKB/Swiss-Prot;Acc:Q9LPC1]	9.53	8.17	8.83	7.17	8.06	8.1	9.21	9.63	9	10.1	11.34	10.2	9.57	9.22	10.84	8.94	10.62	9.49
AT1G02010	SEC1A	secretory 1A [Source:TAIR;Acc:AT1G02010]	3.65	4.82	4.99	3.79	4.15	4.64	4.5	5.16	5.02	4.87	4.47	5.5	6.4	6.2	5.68	6.37	6.85	6.12
AT1G02020		Nitroreductase family protein [Source:UniProtKB/TrEMBL;Acc:O23673]	8.87	8.77	9.09	8.62	8.4	9.59	9.61	10.51	10.38	10.22	10.47	9.65	8.8	9.95	8.67	8.9	8.63	8.99
AT1G02030	ZAT1	Zinc finger protein ZAT1 [Source:UniProtKB/Swiss-Prot;Acc:Q39092]	0	0	0.15	0.08	0.19	0.14	0.39	0.48	0.54	0.3	0.42	0.51	0.66	0.45	0.26	0.26	0.41	0.34
AT1G02040		At1g02040 [Source:UniProtKB/TrEMBL;Acc:Q3EDL3]	0	0	0.09	0.05	0	0.24	0.22	0.05	0	0.05	0	0	0	0	0	0.05	0	0
AT1G02050	PKSA	Type III polyketide synthase A [Source:UniProtKB/Swiss-Prot;Acc:O23674]	10.15	8.74	7.98	9.35	8.42	8.18	8.17	9.13	7.3	6.83	7.9	7.77	7.1	7.01	7.35	6.33	6.01	5.34
AT1G02060		Pentatricopeptide repeat-containing protein At1g02060, chloroplastic [Source:UniProtKB/Swiss-Prot;Acc:O81908]	0	1.26	2.16	0.21	0.57	1.37	1.62	0.54	2.16	3.7	2.8	2.47	1.46	1.31	1.8	2.21	2.44	1.12
AT1G02065	SPL8	Squamosa promoter-binding-like protein 8 [Source:UniProtKB/Swiss-Prot;Acc:Q8GXL3]	1.29	1.32	1.54	0.99	0.69	0.68	0.21	0.22	0.2	0.03	0.14	0.12	0.03	0	0	0.03	0.03	0.03
AT1G02067		-	0	3.83	0	6.61	0	0	0	0	0	0	0	3.84	0	0	0	0	0	0
AT1G02070		At1g02070 [Source:UniProtKB/TrEMBL;Acc:Q0IGM8]	4.89	5.28	3.08	5.08	5.01	4.11	1.16	1.06	1.06	1.16	1.27	0.92	0.35	0.43	0.17	0.42	1.29	0.75
AT1G02080		Transcription regulator [Source:UniProtKB/TrEMBL;Acc:F4HVV6]	15.87	29.05	29.75	18.07	24.82	25.03	26.92	32.94	29.33	43.92	43.6	47.6	53.74	60.23	53.52	53.36	54.07	57.43
AT1G02090	CSN7	COP9 signalosome complex subunit 7 [Source:UniProtKB/Swiss-Prot;Acc:Q94JU3]	97.36	81.27	80.2	95.55	85.46	87.51	68.01	67.56	68.73	81.77	86.8	83.41	67.79	67.96	67.26	64.17	66.52	65.28
AT1G02100	LCMT1	Leucine carboxyl methyltransferase 1 homolog [Source:UniProtKB/Swiss-Prot;Acc:Q8VY08]	23.43	25.74	28.55	32.24	28.59	30.33	31.7	32.72	32.17	38.67	40.9	43.54	52.53	46.2	44.84	47.84	48.25	44.82
AT1G02110		BZIP domain class transcription factor (DUF630 and DUF632) [Source:UniProtKB/TrEMBL;Acc:Q56W45]	15.59	15.86	14.01	25.61	25.16	24.61	34.78	37.83	36.85	16.19	19.47	18.47	24.9	26.27	25.4	23.81	25.18	26.01
AT1G02120	VAD1	Protein VASCULAR ASSOCIATED DEATH 1, chloroplastic [Source:UniProtKB/Swiss-Prot;Acc:F4HVW5]	40.39	48.56	48.19	56.46	51.4	51.49	43.67	44.93	46.83	54.07	51.3	53.35	50.63	52.68	52.53	50.06	52.06	52.34
AT1G02130	RABD2A	Ras-related protein RABD2a [Source:UniProtKB/Swiss-Prot;Acc:P28188]	58.77	49.41	49.1	53.7	52.39	51.75	49.79	48.83	50.29	58.72	55.44	55.97	47.21	56.44	55.97	54.87	53.49	50.41
AT1G02140	MEE63	MEE63 [Source:UniProtKB/TrEMBL;Acc:A0A178WA48]	249.94	219.04	220.51	257.21	251.51	245.79	211.55	198.05	198.87	203.26	222.79	214.57	196.3	188.47	198.6	203.38	214.34	221.04
AT1G02145	ALG12	Dol-P-Man:Man(7)GlcNAc(2)-PP-Dol alpha-1,6-mannosyltransferase [Source:UniProtKB/Swiss-Prot;Acc:A8MR93]	22.3	25.7	23.73	27.94	27.51	25.34	21.43	20.09	19.46	29.8	27.83	29.99	28.76	28.63	26.91	28.67	29.53	28.91
AT1G02150		Pentatricopeptide repeat-containing protein At1g02150 [Source:UniProtKB/Swiss-Prot;Acc:Q8LPS6]	22.14	17.75	22.85	29.15	32.81	30.49	38.71	44.12	42.43	24.44	26.75	25.01	26.95	25.35	27.1	23.11	20.8	20.82
AT1G02160		Cox19 family protein (CHCH motif) [Source:UniProtKB/TrEMBL;Acc:A8MQS6]	133.74	91.39	93.57	114.88	111.35	113.37	85.96	72.27	74.44	87.09	86.54	86.51	71.81	71.62	75.99	82.87	86.32	75.69
AT1G02170	AMC1	MCP1b [Source:UniProtKB/TrEMBL;Acc:A0A178W8H4]	45.22	38.43	34.79	37.95	39.07	38.77	41.29	42.83	40.94	42.31	41.58	43.09	38.95	39.03	39.2	38.63	41.77	39.03
AT1G02180		Ferredoxin-like protein [Source:UniProtKB/TrEMBL;Acc:Q8GYG8]	22.55	17.22	19.48	25.75	24.96	23.41	17.37	16.68	18.08	10.1	11.42	11.58	8.32	8.1	7.41	8.66	8.28	8.8
AT1G02190		Protein CER1-like 1 [Source:UniProtKB/Swiss-Prot;Acc:F4HVX7]	68.45	63.55	65.71	15.17	15.29	15.16	3.22	3.95	3.76	6.85	8	7.09	1.96	1.95	2.02	1.17	1.3	1.1
AT1G02205	CER1	Fatty acid hydroxylase superfamily [Source:TAIR;Acc:AT1G02205]	11.11	12.24	11.33	15.3	15.04	14.85	2.84	3.53	2.91	2.42	2.54	3.13	0.68	0.65	0.65	0.31	0.73	0.51
AT1G02210		At1g02210 [Source:UniProtKB/TrEMBL;Acc:Q3E7L2]	0	0	0	0	0	0	0	0	0	0	0	0	0	0	0	0	0	0
AT1G02220	NAC003	NAC domain-containing protein 3 [Source:UniProtKB/Swiss-Prot;Acc:Q5PP28]	0.3	0.23	0.06	0.04	0.3	0.07	0.21	0.07	0.17	0.57	0.65	0.26	1.18	1.06	1.12	2.37	2.98	2.49
AT1G02230	NAC004	NAC domain-containing protein 4 [Source:UniProtKB/Swiss-Prot;Acc:O81913]	0.07	0.04	0	0.04	0.03	0.11	0	0.12	0.1	0.24	0.07	0.19	0.12	0.19	0.15	0.3	0.14	0.34
AT1G02250	NAC005	NAC domain-containing protein 5 [Source:UniProtKB/Swiss-Prot;Acc:O81914]	0.22	0.39	0.09	0.21	0.22	0.41	0.13	0.37	0.6	0.15	0.23	0.43	0.25	0.36	0.33	0.14	0.45	0.39
AT1G02260		At1g02260 [Source:UniProtKB/TrEMBL;Acc:O81915]	15.5	17.79	17.42	15.98	17.6	17.15	13.57	13.97	12.6	18.79	17.53	17.11	14.95	14.63	15.3	15.29	14.62	15.33
AT1G02270		Uncharacterized calcium-binding protein At1g02270 [Source:UniProtKB/Swiss-Prot;Acc:O81916]	29.13	28.67	28.42	26.67	26.05	24.4	28.21	27.5	26.83	19.04	20.63	20.59	20.53	20.57	21.4	18.58	18.23	18.21
AT1G02280	TOC33	Translocase of chloroplast 33, chloroplastic [Source:UniProtKB/Swiss-Prot;Acc:O23680]	56.84	50.17	51.55	80.09	73.58	73.78	78.25	78.5	71.37	71.31	73.35	69.57	61.34	62.56	60.13	54.81	52.47	49.78
AT1G02290		At1g02290 [Source:UniProtKB/TrEMBL;Acc:Q6GKW8]	4.68	5.93	5.8	4.99	4.25	5.87	5.17	5.98	5.77	4.08	4.22	3.7	4.23	4.07	4.25	4.29	4.04	4.21
AT1G02300	CATHB1	Cathepsin B-like protease 1 [Source:UniProtKB/Swiss-Prot;Acc:F4HVZ1]	21.3	12.78	10.52	21.44	24.96	21.79	17.87	20.06	15.14	9.02	6.8	8.5	11.2	10.24	11.94	10.63	7.98	9.26
AT1G02305	CATHB2	Cathepsin B-like protease 2 [Source:UniProtKB/Swiss-Prot;Acc:Q93VC9]	110.83	118.52	114.03	111.05	112.4	113.53	118.87	114.73	114.27	96.34	96.08	99.11	93.62	92.73	99.82	117.45	117.83	116.45
AT1G02310	MAN1	MAN1 [Source:UniProtKB/TrEMBL;Acc:A0A178WL81]	0.08	0.16	0.4	1.19	1.09	1.14	5.29	5.33	5.18	1.58	1.6	1.27	12.7	11.73	11.11	11.69	13.99	12.56
AT1G02320		unknown protein; Ha. [Source:TAIR;Acc:AT1G02320]	0	0	0	0	0	0	0	0	0	0	0	0	0	0	0	0	0	0
AT1G02330	CSU2	CONTAINS InterPro DOMAIN/s: Hepatocellular carcinoma-associated antigen 59 (InterPro:IPR010756); Ha. [Source:TAIR;Acc:AT1G02330]	35.69	41.18	44.64	53.49	53.12	53.36	49.64	48.82	44.6	69.87	70.86	69.39	65.99	67.86	72.65	66.09	65.29	66.3
AT1G02335	GL22	Germin-like protein subfamily 2 member 2 [Source:UniProtKB/Swiss-Prot;Acc:Q9FZ27]	0.16	0.06	0.57	0	0.16	0.12	0.56	0.69	0.36	0.19	0.05	0.18	0.19	0	0.24	0.12	0.29	0.11
AT1G02340	HFR1	Transcription factor HFR1 [Source:UniProtKB/Swiss-Prot;Acc:Q9FE22]	2.98	4.36	3.57	2.76	2.61	2.08	2.27	2.72	2.24	1.21	1.49	1.04	0.69	0.98	0.43	0.82	0.56	1.08
AT1G02350		Protoporphyrinogen oxidase-like protein [Source:UniProtKB/TrEMBL;Acc:F4HVZ8]	13.09	9.57	8.59	5.87	7.22	6.31	4.46	4.21	5.32	4.71	5.24	4.93	3.63	4.43	5.05	3.81	6.59	5.55
AT1G02360		Chitinase family protein [Source:TAIR;Acc:AT1G02360]	0	0	0	0	0	0	0	0	0	0	0	0	0	0	0.1	0	0	0
AT1G02370		Pentatricopeptide repeat-containing protein At1g02370, mitochondrial [Source:UniProtKB/Swiss-Prot;Acc:Q9FZ24]	6.6	6.88	7.59	7.32	6.47	6.03	6.57	7.15	7.24	9.77	10.61	10.2	8.4	8.17	8.56	6.44	7.05	7.62
AT1G02380		T6A9.7 protein [Source:UniProtKB/TrEMBL;Acc:Q9FZ23]	2.39	2.53	1.76	2.28	2.22	2.27	2.28	2.1	2.05	2.49	2.15	1.33	1.57	1.52	1.66	1.68	1.13	1.23
AT1G02390	GPAT2	Probable glycerol-3-phosphate acyltransferase 2 [Source:UniProtKB/Swiss-Prot;Acc:Q9FZ22]	0.71	0.83	0.75	2.5	2.5	2.19	11.08	11.83	12.07	0.49	0.48	0.74	1.81	1.87	1.74	1.46	1.48	1.39
AT1G02400	GA2OX6	Gibberellin 2-beta-dioxygenase 6 [Source:UniProtKB/Swiss-Prot;Acc:Q9FZ21]	2.99	2.94	2.92	4.02	4.81	3.89	6.42	6.88	5.58	4.63	5.12	3.37	17.51	17.24	17.27	8.84	8.23	8.32
AT1G02405		At1g02405 [Source:UniProtKB/TrEMBL;Acc:Q6NMD9]	5.56	3.74	4.57	3.82	4.31	4.14	3.22	2.48	2.5	3.82	4.15	2.87	4.69	5.05	5.05	6.21	6.97	6.28
AT1G02410	COX11	Cytochrome c oxidase assembly protein COX11, mitochondrial [Source:UniProtKB/Swiss-Prot;Acc:Q8GWR0]	28.58	26.35	24.69	27.6	24.85	25.62	25.09	23.45	23.77	28.04	28.6	27.15	25.82	25.48	24.82	26.12	27.7	29.8
AT1G02420		Putative pentatricopeptide repeat-containing protein At1g02420 [Source:UniProtKB/Swiss-Prot;Acc:Q9FZ19]	0.5	2.51	1.66	0.86	0.54	1.31	1.55	1.14	2.06	2.7	2.01	1.68	2.11	1.35	2.19	1.49	1.62	1.58
AT1G02430	ATARFD1B	ADP-ribosylation factor D1B [Source:UniProtKB/TrEMBL;Acc:F4HXI4]	0	0.31	0.42	0.11	0.24	0.22	0.25	0.15	0.07	1.05	0.35	0.1	0.37	0.32	0.3	0.44	0.68	0.55
AT1G02440	ATARFD1A	ADP-ribosylation factor D1A [Source:UniProtKB/TrEMBL;Acc:F4HXI5]	0.72	0.45	0.08	0.86	0.61	0.09	0.16	0.09	0.45	0.38	0.64	0	0.47	0.15	0.18	0.27	0.43	0.4
AT1G02450	NIMIN-1	NIMIN1 [Source:UniProtKB/TrEMBL;Acc:A0A178WC43]	2.95	2.63	2.67	1.95	2	0.96	1.24	0.4	0.93	0	0.76	0.62	1.92	1.06	1.2	1.35	1.4	1.21
AT1G02460		At1g02460 [Source:UniProtKB/TrEMBL;Acc:Q9FWX5]	1.26	1.39	1.13	1.48	0.76	1.27	0.72	0.64	0.49	0.59	0.28	0.24	0.46	0.61	0.29	0.51	0.35	0.67
AT1G02470		Polyketide cyclase/dehydrase and lipid transport superfamily protein [Source:UniProtKB/TrEMBL;Acc:F4HXI8]	0.41	1	0.43	1.87	0.63	1.24	1.6	1.15	1.25	1.5	2.08	1.45	1.42	0.15	0.97	0.12	0	1.32
AT1G02475		Polyketide cyclase/dehydrase and lipid transport superfamily protein [Source:UniProtKB/TrEMBL;Acc:Q94K52]	15.74	13.32	14.2	18.64	16.73	16.89	15.93	15.89	12.35	15.31	16.28	17.36	15.38	15.14	15.04	17.5	16.62	16.86
AT1G02480		pre-tRNA [Source:TAIR;Acc:AT1G02480]	0	0	0	0	0	0	0	0	0	0	0	0	0	0	0	0	0	0
AT1G02490		unknown protein; Ha. [Source:TAIR;Acc:AT1G02490]	0.69	0	0	1.68	0	0	0	0	0.69	1.76	3.73	0.89	0.86	0	5.36	0	1.51	2.29
AT1G02500	SAM1	S-adenosylmethionine synthase [Source:UniProtKB/TrEMBL;Acc:A0A178WES1]	204.29	188.01	189.91	177	171.81	175.48	146.73	160.75	148.35	157.88	157.42	160.89	154.85	155.86	158.05	155.61	160.21	162.94
AT1G02510	TPK4	TPK4 [Source:UniProtKB/TrEMBL;Acc:A0A178W803]	0	0	0.05	0	0	0	0	0	0	0	0	0	0	0.05	0	0	0	0.1
AT1G02520	ABCB11	ABC transporter B family member 11 [Source:UniProtKB/Swiss-Prot;Acc:Q9FWX7]	13.27	4.05	3.99	1.33	1.37	3.04	3.68	1.09	0.75	1.78	1.76	1.84	2.38	2.41	2.26	2.6	2.92	2.99
AT1G02530	ABCB12	PGP12 [Source:UniProtKB/TrEMBL;Acc:A0A178WBY9]	49	59.08	61.34	27.2	31.35	30.55	8.17	9.61	8.77	10.98	10.04	11.9	5.16	5.77	5.73	4.01	3.99	4.65
AT1G02540		T14P4.13 protein [Source:UniProtKB/TrEMBL;Acc:Q9FWX9]	0	0	0	0	0	0	0	0	0	0	0	0	0	0	0	0	0	0
AT1G02550		Invertase [Source:UniProtKB/TrEMBL;Acc:Q4PT42]	1.53	1.64	0.89	0.3	0.17	0.65	0.09	0.3	0	0	0.34	0	0.4	0.16	0.37	0.19	0.18	0.42
AT1G02560	CLPP5	ATP-dependent Clp protease proteolytic subunit [Source:UniProtKB/TrEMBL;Acc:A0A178WMF0]	83.01	80.74	80.53	104.96	107.01	101.61	129.01	125.71	124.09	108.11	110.7	105.72	111.95	106.04	109.89	104.03	110.45	111.19
AT1G02570		Transmembrane protein [Source:UniProtKB/TrEMBL;Acc:Q1PFZ3]	0.59	0.54	0.44	1.32	1.01	1.28	31.48	26.63	30.7	73.17	68.54	67.08	54.88	54.27	60.85	48.6	53.41	47.86
AT1G02575		unknown protein; BEST Arabidopsis thaliana protein match is: unknown protein (TAIR:AT1G02570.1). [Source:TAIR;Acc:AT1G02575]	0.3	0.34	0.21	0.42	0.36	0.39	0	0.06	0.19	0.12	0.35	0	0.06	0.19	0	0.06	0.05	0.15
AT1G02580	MEA	Histone-lysine N-methyltransferase MEDEA [Source:UniProtKB/Swiss-Prot;Acc:O65312]	2.06	2.65	2.53	1.77	2.48	1.88	1.96	1.67	1.74	4.26	4.65	4.04	2.42	1.96	2.15	1.79	2.41	1.91
AT1G02590		Aldehyde oxidase/xanthine dehydrogenase, molybdopterin binding protein [Source:UniProtKB/TrEMBL;Acc:F4HXK3]	0	0	0	0	0	0	0	0	0	0	0	0	0	0	0	0	0	0
AT1G02600		pre-tRNA [Source:TAIR;Acc:AT1G02600]	0	0	0	0	0	0	0	0	0	0	0	0	0	0	0	0	0	0
AT1G02610		RING/FYVE/PHD zinc finger superfamily protein [Source:UniProtKB/TrEMBL;Acc:F4HXK4]	3.91	4.08	3.97	3.59	2.7	3.34	2.02	1.79	1.64	1.5	2.05	1.79	1.41	1.63	1.25	1.05	1.47	1.17
AT1G02620		Ras-related small GTP-binding family protein [Source:UniProtKB/TrEMBL;Acc:Q3E6Q3]	0.11	0.16	0.18	0.04	0.14	0.19	0.15	0.04	0.37	0.33	0.45	0.47	0.49	0.54	0.27	0.39	0.45	0.28
AT1G02630	ETN8	Equilibrative nucleotide transporter 8 [Source:UniProtKB/Swiss-Prot;Acc:Q84XI3]	0.3	0.15	0.18	0.47	0.09	0.34	0.24	0.24	0.1	0.07	0.05	0.03	0	0.03	0.1	0	0.06	0
AT1G02640	BXL2	Probable beta-D-xylosidase 2 [Source:UniProtKB/Swiss-Prot;Acc:Q94KD8]	8.17	7.13	8.13	3.71	3.98	4.09	1.17	1.57	1.26	1.79	1.61	2.39	0.48	0.44	0.66	0.44	0.68	0.39
AT1G02650		T14P4.7 protein [Source:UniProtKB/TrEMBL;Acc:Q9FWY3]	0.57	0.56	0.29	1.66	1.26	1.46	2.03	1.89	2.6	7.3	7.38	8.58	12.07	11.36	12.53	12.12	11.81	10.26
AT1G02660	PLIP2	Phospholipase A1 PLIP2, chloroplastic [Source:UniProtKB/Swiss-Prot;Acc:F4HXL0]	40.34	47.23	46.42	45.33	45.01	47.7	28.12	30.28	28.69	18.86	17.91	18.12	26.57	25.51	25.67	19.2	16.94	20.01
AT1G02670		P-loop containing nucleoside triphosphate hydrolases superfamily protein [Source:TAIR;Acc:AT1G02670]	3.85	4.99	5.04	4.58	4.57	5.55	4.23	5.31	4.39	4.72	4.58	4.5	6.2	5.27	4.95	5	4.88	4.89
AT1G02680	TAF13	Transcription initiation factor TFIID subunit 13 [Source:UniProtKB/Swiss-Prot;Acc:Q6NQH4]	37.44	33.65	27.82	38.3	39.66	36.63	27.45	24.76	25.46	30.62	35.71	34.52	34.43	28	31.35	30.23	33.41	29.81
AT1G02690	IMPA-6	Importin subunit alpha [Source:UniProtKB/TrEMBL;Acc:F4HXL3]	22.96	26.8	28.42	33.15	34.3	33.54	37.83	37.06	35.54	56.01	59.53	54.34	55.65	56.56	57.97	48.66	46.05	48.33
AT1G02700		GATA transcription factor-like protein [Source:UniProtKB/TrEMBL;Acc:Q9FWY8]	0.77	0.45	0.49	0.95	0.62	0.48	8.41	7.39	7.19	10.12	12.5	11.5	23.57	22.33	23.35	31.35	28.07	31.71
AT1G02705		-	0	0.28	0	0.78	0	0.26	2.27	2.83	1.48	1.56	1.62	3.6	10.3	6.59	5.61	2.85	8.54	8.3
AT1G02710		Glycine-rich protein [Source:UniProtKB/TrEMBL;Acc:Q3EDK2]	0	0	0	0.19	0	0	2.17	3.75	4.92	0.51	4.31	0	0	0.58	3.66	3.07	5.09	0
AT1G02720	GATL5	Probable galacturonosyltransferase-like 5 [Source:UniProtKB/Swiss-Prot;Acc:Q9FWY9]	12.66	13.67	14.48	8.96	11.91	11.06	39.41	42.69	38.24	42.73	45.94	46.38	124.51	135.59	132.9	157.8	154.46	157.09
AT1G02730	CSLD5	Cellulose synthase-like protein D5 [Source:UniProtKB/Swiss-Prot;Acc:Q9SRW9]	4.35	6.55	5.91	18.12	20.21	20.79	37.01	39.62	37.12	37.37	36.72	38.76	54.33	56.97	59.23	43.72	45.7	44.97
AT1G02740	MRG2	Protein MRG2 [Source:UniProtKB/Swiss-Prot;Acc:Q4V3E2]	10.96	13.25	14.63	12.72	11.57	12.86	13.92	12.26	10.99	10.54	9.63	10.47	8.35	9.31	9.57	7.46	8.76	10.13
AT1G02750	DI19-2	Protein DEHYDRATION-INDUCED 19 homolog 2 [Source:UniProtKB/Swiss-Prot;Acc:Q8GWK1]	21.13	18.92	21.02	21.47	22.89	22.08	15.06	12.69	14.8	19.77	21.51	19.68	27.58	23.42	19.83	21.38	23.35	21.42
AT1G02760		pre-tRNA [Source:TAIR;Acc:AT1G02760]	0	0	0	0	0	0	0	0	0	0	0	0	0	0	0	0	0	0
AT1G02770		UPF0725 protein At1g02770 [Source:UniProtKB/Swiss-Prot;Acc:Q9SRX1]	44.59	43.14	43.55	54.06	57.8	58.38	52.42	48.75	47.18	58.24	65.19	60.65	63.56	63.17	60.8	70.33	65.06	69.23
AT1G02780	RPL19A	60S ribosomal protein L19-1 [Source:UniProtKB/Swiss-Prot;Acc:Q9SRX2]	1085.2	932.35	911.81	1066.28	960.33	946.21	938.58	951.07	950.51	914.76	971.09	926.13	870.28	844.58	832.8	769.7	799.68	825.51
AT1G02790	PGA3	Exopolygalacturonase clone GBGE184 [Source:UniProtKB/Swiss-Prot;Acc:P49062]	1.74	2.22	1.65	0.73	0.89	1.16	0.46	0.16	0.16	0.03	0.19	0.12	0.13	0.35	0.34	0.34	0.45	0.14
AT1G02800	CEL2	Endoglucanase 1 [Source:UniProtKB/Swiss-Prot;Acc:Q9SRX3]	19.63	22.22	20.25	16.95	16.65	16.96	17.4	19.59	18.28	3.88	4.45	3.91	3.37	3.48	3.4	2.95	2.89	2.66
AT1G02810	PME7	Probable pectinesterase/pectinesterase inhibitor 7 [Source:UniProtKB/Swiss-Prot;Acc:Q9SRX4]	0.28	0.28	0.46	1.29	1.27	1.54	7.54	6.32	6.14	0.95	0.92	0.86	1.23	1.22	0.98	1.28	0.89	1.03
AT1G02813		Protein of unknown function, DUF538 [Source:TAIR;Acc:AT1G02813]	1.01	0.46	0.97	0.36	0.82	0.22	0.31	0.24	0.19	0	0.1	0	0.12	0.1	0.45	0.57	0.32	0.2
AT1G02816		F22D16.19 protein [Source:UniProtKB/TrEMBL;Acc:Q9SRX5]	31.65	26.33	31.41	23.74	23.86	21.77	19.96	17.94	16.25	25.23	26.8	27.43	16.53	17.89	19.06	16.14	18.63	17.99
AT1G02820	LEA2	LEA3 [Source:UniProtKB/TrEMBL;Acc:A0A178WJ88]	9.53	5.42	5.03	1.44	1.51	1.25	0.22	0.5	0.81	0.76	1.91	1.19	0.75	0.76	0.79	1.6	0.76	0.86
AT1G02830	RPL22A	Putative 60S ribosomal protein L22-1 [Source:UniProtKB/Swiss-Prot;Acc:Q9SRX7]	0	0	0	0	0.22	0	0	0	0	0	0.22	0	0	0.42	0.47	0	0.45	0
AT1G02840	SR34	Serine/arginine-rich-splicing factor SR34 [Source:UniProtKB/Swiss-Prot;Acc:O22315]	135.51	117.06	113.65	149.29	142.02	136.15	135.47	148.98	142.39	161.33	169.41	169.58	168.24	158.48	153.26	177.84	181.8	178.12
AT1G02850	BGLU11	Beta-glucosidase 11 [Source:UniProtKB/Swiss-Prot;Acc:B3H5Q1]	0.21	0.34	0.68	0.43	0.65	0.3	4.73	4.92	4.68	1.51	1.63	2.2	5.65	4.52	4.96	10.09	8.61	10.38
AT1G02860	BAH1	E3 ubiquitin-protein ligase BAH1 [Source:UniProtKB/Swiss-Prot;Acc:Q9SRX9]	6.03	6.02	5.68	15.31	13.35	12.86	23.39	25.55	23.72	17.7	18.98	19.63	13.32	14.34	15.13	14.39	14.05	15.85
AT1G02870		At1g02870 [Source:UniProtKB/TrEMBL;Acc:Q8RWK5]	40.22	38.46	38.69	50.9	49.07	50.8	33.34	33.59	30.66	62.2	63.96	63.74	48.09	45.3	45.79	37.25	39.68	41.11
AT1G02880	TPK1	thiamin pyrophosphokinase1 [Source:TAIR;Acc:AT1G02880]	9.9	9.25	8.42	9.24	9.39	10.6	9.58	8.08	11.01	7.07	7.3	6.59	7.8	8.16	9.27	8.36	7.92	7.94
AT1G02890		AAA-type ATPase family protein [Source:UniProtKB/TrEMBL;Acc:F4HZ82]	22.19	35.23	36.39	25.96	31.73	30.13	46.43	50.76	49.11	43.61	43.13	45.23	50.53	51.73	50.68	50.74	52.44	51.68
AT1G02900	RALF1	RALFL1 [Source:UniProtKB/TrEMBL;Acc:A0A178WER1]	3.29	3.03	2.53	1.27	0.81	0.95	0	0.31	0.19	0.16	0.27	0.22	0.31	0.71	0.44	2.77	3.79	4.01
AT1G02910	LPA1	Protein LOW PSII ACCUMULATION 1, chloroplastic [Source:UniProtKB/Swiss-Prot;Acc:Q9SRY4]	12.3	12.96	12.57	17.54	16.3	15.93	18.26	16.65	16.91	14.68	14.19	16.08	16.16	14.32	14.04	14.51	14.96	14.96
AT1G02920	GSTF7	Glutathione S-transferase F7 [Source:UniProtKB/Swiss-Prot;Acc:Q9SRY5]	0.04	0	0.13	0	0.08	0.05	0.13	0.05	0.04	0.15	0	0	0.05	0.04	0	0	0.04	0
AT1G02930	GSTF6	Glutathione S-transferase F6 [Source:UniProtKB/Swiss-Prot;Acc:P42760]	2119.13	1981.82	1946.96	1649.56	1519.56	1499.47	289.73	288.66	271.82	252.76	219.38	218.94	109.83	111.42	106.57	68.12	67.13	64.24
AT1G02940	ATGSTF5	glutathione S-transferase (class phi) 5 [Source:TAIR;Acc:AT1G02940]	200.51	169.02	163.49	99.84	93.19	90.2	17.68	18.21	17.63	40.62	34.83	31.88	14.94	13.75	13.05	11.74	13.14	12.03
AT1G02950	ATGSTF4	glutathione S-transferase F4 [Source:TAIR;Acc:AT1G02950]	0.86	1.39	1.17	0.07	0.25	0.2	0.06	0	0.06	0.07	0.06	0	0.07	0.12	0.07	0	0	0
AT1G02952		other RNA [Source:TAIR;Acc:AT1G02952]	0	0	1.64	0	0	0	0	0	0	0	0	0	0	0	0	0	0	0
AT1G02960		Kinetochore protein [Source:UniProtKB/TrEMBL;Acc:Q8GWB5]	15.39	16.35	17.42	17.41	16.5	15.37	13.05	13.49	13.25	17.58	17.52	19.2	16.92	17.82	15.22	18.56	17.08	16.65
AT1G02965		unknown protein; BEST Arabidopsis thaliana protein match is: unknown protein (TAIR:AT1G02960.3); Ha. [Source:TAIR;Acc:AT1G02965]	0	0	0	0	0	0	0	0	0	0	0.17	0	0	0	0	0	0	0.18
AT1G02970	WEE1	Wee1-like protein kinase [Source:UniProtKB/Swiss-Prot;Acc:Q8L4H0]	7.07	8.81	9.05	11	10.9	10.95	12.36	11.91	13.92	20.05	22.45	20.8	21.16	21.36	19.6	18.86	19.13	18.77
AT1G02980	CUL2	Cullin-2 [Source:UniProtKB/Swiss-Prot;Acc:Q9SRZ0]	30.8	40.29	42.21	37.62	38.8	36.76	27.66	28.23	28.67	78.34	82.57	74.04	62.84	65.77	60.93	49.6	49.44	47.89
AT1G02990		BEST Arabidopsis thaliana protein match is: CW-type Zinc Finger (TAIR:AT3G62900.1); Ha. [Source:TAIR;Acc:AT1G02990]	2.86	6.07	6.37	4.67	5.52	4.84	5.65	5.57	5.94	5.79	6.26	6.01	5.88	6.5	6.35	5.22	6.05	6.04
AT1G03000	PEX6	Peroxisome biogenesis protein 6 [Source:UniProtKB/Swiss-Prot;Acc:Q8RY16]	9.18	12.32	12.23	8.73	9.76	9.61	9.68	10.2	10.78	13.34	14.03	14.09	13.48	15	13.54	14.13	14.56	14.27
AT1G03010		BTB/POZ domain-containing protein At1g03010 [Source:UniProtKB/Swiss-Prot;Acc:Q9SA69]	0.73	0.83	0.94	0.21	0.38	0.31	0.1	0.1	0.19	0.05	0.17	0.1	0	0	0.05	0.04	0.02	0
AT1G03020	GRXS1	Monothiol glutaredoxin-S1 [Source:UniProtKB/Swiss-Prot;Acc:Q9SA68]	0	0	0	0	0	0	0.1	0.12	0	0.23	0	0.11	0	0	0	0	0	0
AT1G03030		At1g03030 [Source:UniProtKB/TrEMBL;Acc:Q500U9]	25.31	25.36	24.3	21.83	22.46	21.23	21.64	24.14	18.42	19.86	21.8	18.86	18.34	16.37	17.98	17.9	17.81	17.74
AT1G03040		basic helix-loop-helix (bHLH) DNA-binding superfamily protein [Source:TAIR;Acc:AT1G03040]	85.13	92.52	88.36	74.4	71.56	66.85	51.53	54.61	52.82	48.84	48.3	47.49	43.89	44.78	45.11	43.89	43.78	60.89
AT1G03050		Putative clathrin assembly protein At1g03050 [Source:UniProtKB/Swiss-Prot;Acc:Q9SA65]	0.12	0.45	0.13	0.07	0.06	0.13	0.06	0.18	0.08	0.07	0.18	0	0.07	0.04	0.13	0.09	0.07	0.04
AT1G03055	D27	Beta-carotene isomerase D27, chloroplastic [Source:UniProtKB/Swiss-Prot;Acc:Q7XA78]	7.44	6.91	6.39	6.73	8.95	7.48	11.98	11.82	11.26	10.9	11.63	11.2	10.69	10.29	7.7	10.82	10.95	8.92
AT1G03060	SPI	Protein SPIRRIG [Source:UniProtKB/Swiss-Prot;Acc:F4HZB2]	3.14	7.9	7.86	6.01	7.86	6.88	10.21	12.12	10.79	9.75	9.26	10.1	11.88	13.91	12.4	10.22	10.39	11.85
AT1G03070	LFG4	Protein LIFEGUARD 4 [Source:UniProtKB/Swiss-Prot;Acc:Q9SA63]	8.4	7.69	8.78	9.63	8.78	9.15	9.36	8.88	8.96	13.08	12.87	14.14	11.7	12.03	12.96	25.53	24.37	23.8
AT1G03080	NET1D	Protein NETWORKED 1D [Source:UniProtKB/Swiss-Prot;Acc:F4HZB5]	4.26	10.73	11.46	8.34	8.29	8.9	10.46	11.06	9.87	11.19	11.04	12.57	10.64	11.39	11.11	10.29	10.33	11.34
AT1G03090	MCCA	Methylcrotonoyl-CoA carboxylase subunit alpha, mitochondrial [Source:UniProtKB/Swiss-Prot;Acc:Q42523]	15.13	17.19	15.41	12.61	17.06	17.67	15.09	15.42	15.62	17.3	16.6	18.23	16.85	16.82	16.16	16.39	15.45	17.1
AT1G03100		Pentatricopeptide repeat-containing protein At1g03100, mitochondrial [Source:UniProtKB/Swiss-Prot;Acc:Q9SA60]	1.77	2.01	2.12	2.02	1.86	2.22	2.14	2.26	2.31	3.5	4.01	3.56	3.35	3.37	3.65	3.99	4.04	3.81
AT1G03103		Bifunctional inhibitor/lipid-transfer protein/seed storage 2S albumin superfamily protein [Source:UniProtKB/TrEMBL;Acc:F4HZB9]	0.1	0	0.22	0	0	0	2.57	2.78	1.48	2.24	3.96	6	134.42	126.98	137.31	504.39	494.4	524.13
AT1G03106		At1g03105 [Source:UniProtKB/TrEMBL;Acc:Q8L760]	0.47	0.93	0.12	0.49	0.24	0.19	0.36	0.55	0.33	0.14	0.41	0	0.69	0.4	0.84	0.92	1.2	1.53
AT1G03110	TRM82	tRNA (guanine-N(7)-)-methyltransferase non-catalytic subunit [Source:UniProtKB/TrEMBL;Acc:A0A178VZV6]	16.24	11.9	14.25	16.4	16.77	16.85	16.09	17.51	17.64	23.09	23.28	21.86	19.33	19.1	17.97	17.35	16.67	18.11
AT1G03120	ATRAB28	Late embryogenesis abundant protein 3 [Source:UniProtKB/Swiss-Prot;Acc:Q9SA57]	4.3	2.82	3.95	7.4	5.25	6.54	6.63	7.24	8.09	5.49	7.27	9.39	11.24	10.79	12.96	16.61	15.37	21.3
AT1G03130	PSAD2	Photosystem I reaction center subunit II-2, chloroplastic [Source:UniProtKB/Swiss-Prot;Acc:Q9SA56]	47.8	37.38	34.95	31.08	32.21	30.78	57.54	59.77	63.54	6.39	7.04	6.94	7.34	7.69	7.91	7.8	6.44	7.33
AT1G03140		F10O3.3 protein [Source:UniProtKB/TrEMBL;Acc:Q9SA55]	45.63	43.3	42.96	46.24	43.57	45.69	50.62	49.59	45.4	63.2	64.67	60.24	61.17	62.06	58.41	60.76	58.94	60.29
AT1G03150	NAA20	N-terminal acetyltransferase B complex catalytic subunit NAA20 [Source:UniProtKB/Swiss-Prot;Acc:Q8LGI8]	31.21	35.18	31.54	34.81	37.25	39.25	29.04	28.07	27.27	49.36	54.28	52.3	46.79	45.04	47.35	46.89	46.52	45.08
AT1G03160	FZL	Probable transmembrane GTPase FZO-like, chloroplastic [Source:UniProtKB/Swiss-Prot;Acc:Q1KPV0]	4.99	6.75	7.43	6.01	7.74	7.7	10.12	11.44	10.6	8.75	7.57	8.89	9.78	9.91	9.66	8.81	9.45	8.56
AT1G03165		-	0	0	0	0	2.93	0	0	0	0	0	0	0	0	2.65	5.02	0	0	0
AT1G03170	FAF2	Protein FANTASTIC FOUR 2 [Source:UniProtKB/Swiss-Prot;Acc:Q8GXU9]	5.06	4.1	4.1	1.75	1.94	2.28	0.4	0.63	0.49	0.71	0.82	0.4	0.32	0.39	0.28	0.26	0.35	0.19
AT1G03180		Non-structural protein [Source:UniProtKB/TrEMBL;Acc:Q5Q0J3]	3.93	3.49	3.63	5.21	6.3	4.64	3.63	5.43	5.44	5.91	4.83	5.37	4.88	4.11	4.89	4.58	4.74	5.69
AT1G03190	XPD	UVH6 [Source:UniProtKB/TrEMBL;Acc:A0A178W4P7]	7.49	12.31	12.4	11.61	12.18	12.5	11.12	11.56	12.08	13.28	13	14.76	14.42	13.81	14.31	13.82	12.66	13.07
AT1G03200		At1g03200 [Source:UniProtKB/TrEMBL;Acc:B6IDH7]	0.28	3.36	1.22	1.76	0.69	2.83	0	1.93	0.61	2.99	2.71	4.36	0.99	1.22	0.38	3.03	1.55	3.58
AT1G03210		Phenazine biosynthesis PhzC/PhzF protein [Source:TAIR;Acc:AT1G03210]	17.25	11.61	12.81	37.14	31.89	32.74	63.28	62.09	61.63	38.3	37.28	38.54	53.71	55.3	52.73	51.62	55.8	56.87
AT1G03220		Eukaryotic aspartyl protease family protein [Source:UniProtKB/TrEMBL;Acc:Q9ZVS4]	1.72	1.5	2.15	2.55	2.8	2.83	7.3	5.85	7.25	1.81	2.86	2.19	3.91	3.79	4.68	5.46	5.38	4.54
AT1G03230		Eukaryotic aspartyl protease family protein [Source:UniProtKB/TrEMBL;Acc:Q9ZVS5]	1.52	1.16	1.23	2	2.3	2	5.09	4.29	5.26	1.6	1.53	1.22	1.89	1.4	1.39	1.07	1.24	1.69
AT1G03240		unknown protein; BEST Arabidopsis thaliana protein match is: unknown protein (TAIR:AT1G03200.1); Ha. [Source:TAIR;Acc:AT1G03240]	0	0	0.15	0	0.42	0	0	0.34	0	0.33	0.28	0.16	0	0	0	0	1.03	0.42
AT1G03250		unknown protein; Ha. [Source:TAIR;Acc:AT1G03250]	32.28	33.35	32.08	37.96	37.76	38.62	41.02	43.96	41.38	34.6	37.27	35.87	39.64	40.24	40.41	40.15	40.06	38.11
AT1G03260		At1g03260 [Source:UniProtKB/TrEMBL;Acc:Q6NMJ6]	17.27	17.42	15.19	16.18	16.72	15.86	17.32	17.27	18.41	14.53	17.04	15.61	19.15	16.74	18.13	16.47	17.69	18.54
AT1G03270	CBSDUF4	Putative DUF21 domain-containing protein At1g03270 [Source:UniProtKB/Swiss-Prot;Acc:Q9ZVS8]	6.4	7.99	9.87	12.83	13.83	14	16.02	16.48	15.95	21.63	24.58	25.15	40.52	39.55	37.38	50.02	50.56	48.2
AT1G03280		TFIIE-alpha 1 [Source:UniProtKB/TrEMBL;Acc:Q93ZW3]	20.13	27.47	27.22	27.67	28.69	29.35	26.62	28.85	29.65	45.43	44.99	44.23	48.4	44.61	46.05	50.53	50.39	47.23
AT1G03290		ELKS/Rab6-interacting/CAST family protein [Source:UniProtKB/TrEMBL;Acc:Q9ZVT0]	29.33	33.03	31.66	40.62	34.75	34.59	32.44	31.18	28.32	38.88	36.82	37.84	38.27	40.19	40.47	40.99	41.57	41.44
AT1G03300	DUF1	DUF724 domain-containing protein 1 [Source:UniProtKB/Swiss-Prot;Acc:Q9ZVT1]	0	0.22	0.32	0	0	0	0	0	0	0	0	0	0	0	0	0	0	0
AT1G03310	ISA2	ISA2 [Source:UniProtKB/TrEMBL;Acc:A0A178WGA8]	16.13	19.3	19.67	11.4	12.67	11.55	16.04	15.33	15.12	13.74	13.49	14.67	16.66	18.02	18.57	16.06	17.1	17.57
AT1G03320		F15K9.8 [Source:UniProtKB/TrEMBL;Acc:Q9ZVT3]	0.18	0.31	0.19	0	0.46	0.3	0.09	0	0	0.32	0	0	0.32	0.17	0.3	0.4	0.19	0.18
AT1G03325		-	0	0	0	0	0	0	0	0	0	0	0	0	0	0	0	0	0	0
AT1G03330	LSM2	Sm-like protein LSM2 [Source:UniProtKB/TrEMBL;Acc:A0A178W785]	104.24	79.13	71.3	101.22	98.9	100.91	63.97	61.65	66.97	85.4	92.59	82.24	82.44	73.74	71.2	78.67	85.89	84.08
AT1G03340		F15K9.6 [Source:UniProtKB/TrEMBL;Acc:Q9ZVT5]	0.74	0.82	0.76	1.14	1.08	1.12	1.08	0.98	0.99	1.09	0.69	0.56	1.56	1.44	0.91	1.56	1.4	1.04
AT1G03350		BSD domain-containing protein [Source:UniProtKB/TrEMBL;Acc:Q9ZVT6]	49.06	47.93	46.87	38.44	40.63	41.52	46.85	49.09	48.7	57.88	52.3	55.19	56.25	54.88	52.6	50.96	49.75	48.48
AT1G03360	RRP4	RRP4 [Source:UniProtKB/TrEMBL;Acc:A0A178W3N1]	18.39	21.95	22.01	21.44	23.67	22.86	22.01	23.73	21.7	40.44	37.05	42.45	32.06	33.63	28.68	25.69	26.45	27.71
AT1G03365	RF4	Putative E3 ubiquitin-protein ligase RF4 [Source:UniProtKB/Swiss-Prot;Acc:Q9ZVT8]	16.38	18.48	17.16	16.89	12.79	16.19	14.11	16.2	13.19	19.51	20.74	19.74	15.45	14.33	16.85	13.16	13.66	15.26
AT1G03370		C2 and GRAM domain-containing protein At1g03370 [Source:UniProtKB/Swiss-Prot;Acc:Q9ZVT9]	4.17	5.33	6.02	3.58	4.39	4.42	4.59	4.69	4.8	3.76	3.67	4.02	4.06	3.85	3.75	3.73	3.33	3.57
AT1G03380	ATG18G	Autophagy-related protein 18g [Source:UniProtKB/Swiss-Prot;Acc:Q8GUL1]	4.98	8.24	8.02	6.6	6.35	6.92	8.3	9.81	8.17	8.57	9	8.61	9.17	10.34	9.51	11.94	11.22	11.66
AT1G03390		F21B7.2 [Source:UniProtKB/TrEMBL;Acc:Q9LR83]	0	0	0	0.13	0.04	0.04	0.11	0.04	0.03	0.04	0.03	0	0.06	0.09	0.08	0.2	0	0.04
AT1G03395		-	0	0	0	0	0	0	0	0	0	0	0	0	0	0	0	0	0	0
AT1G03400		2-oxoglutarate (2OG) and Fe(II)-dependent oxygenase superfamily protein [Source:TAIR;Acc:AT1G03400]	2.31	2.58	2.23	2.19	2.23	1.7	2.02	1.88	1.29	1.91	2.43	1.75	1.67	1.59	2.94	2.71	2.41	2.37
AT1G03410	2A6	1-aminocyclopropane-1-carboxylate oxidase homolog 5 [Source:UniProtKB/Swiss-Prot;Acc:Q43383]	5.23	8.03	7.92	2.55	7.16	5.25	10.81	8.86	11.8	3.94	3.44	3.13	3.22	2.85	2.09	2.71	2.34	3.01
AT1G03430	AHP5	histidine-containing phosphotransfer factor 5 [Source:TAIR;Acc:AT1G03430]	7.84	7.32	8	13.13	13.85	13.18	14.93	14.3	13.83	13.48	16.49	13.19	18.98	18.63	18.2	21.78	20.11	19.85
AT1G03440		Leucine-rich repeat (LRR) family protein [Source:UniProtKB/TrEMBL;Acc:F4I0W7]	4.3	3.6	4.19	21.06	18.75	19.42	31.14	33.61	32.04	29.37	30.67	30.37	38.34	40.98	37.81	35.72	35.15	35.52
AT1G03445	BSU1	Serine/threonine-protein phosphatase [Source:UniProtKB/TrEMBL;Acc:A0A178WIX8]	8.91	12.98	13.08	4.73	6.62	6.94	2.79	2.29	3.14	5.75	6.26	7.11	6.29	6.03	5.75	4.63	5.03	3.79
AT1G03457		RNA-binding (RRM/RBD/RNP motifs) family protein [Source:UniProtKB/TrEMBL;Acc:F4I0X0]	2.46	3.1	2.76	4.82	6.39	6.47	16.81	19.26	20.58	2.15	2.5	1.81	2	1.6	2.22	1.76	1.92	2.05
AT1G03470	NET3A	NET3A [Source:UniProtKB/TrEMBL;Acc:A0A178W5C1]	6.8	7.35	7.83	50.76	47.19	46.5	76.25	66.53	70.25	77.68	77.2	75.69	97.11	90.51	92.62	83.09	86.56	82.55
AT1G03475	CPX1	Coproporphyrinogen-III oxidase 1, chloroplastic [Source:UniProtKB/Swiss-Prot;Acc:Q9LR75]	50.92	52.32	46.85	61.11	58.09	57.73	67.03	65.26	69.35	38.33	39.42	40.04	38.46	40.27	40.8	34.48	37.31	33.41
AT1G03490	NAC006	NAC domain-containing protein 6 [Source:UniProtKB/Swiss-Prot;Acc:Q9LR74]	0	0	0	0	0	0	0	0	0	0	0	0	0	0	0	0	0	0
AT1G03495		HXXXD-type acyl-transferase family protein [Source:TAIR;Acc:AT1G03495]	5.36	3.69	4.13	5.08	4.37	4.4	5.09	6.69	3.98	8.05	6.92	8.33	5.51	6.53	6.26	5.7	8.31	6.68
AT1G03502		snoRNA [Source:TAIR;Acc:AT1G03502]	0	0	0	0	0	0	0	0	0	0	0	0	0	0	0	0	0	0
AT1G03506		snoRNA [Source:TAIR;Acc:AT1G03506]	0	0	0	0	0	0	0	0	0	0	0	0	0	0	0	0	0	0
AT1G03510	PCMP-E3	Putative pentatricopeptide repeat-containing protein At1g03510 [Source:UniProtKB/Swiss-Prot;Acc:Q9LR72]	2.95	3.54	3.34	2.31	2.89	3.06	2.86	2.35	2.96	4.58	3.63	4.08	4.01	3.53	4.09	3.04	3.41	3.06
AT1G03515		pre-tRNA [Source:TAIR;Acc:AT1G03515]	0	0	0	0	0	0	0	0	0	0	0	0	0	0	0	0	0	0
AT1G03520		Core-2/I-branching beta-1,6-N-acetylglucosaminyltransferase family protein [Source:UniProtKB/TrEMBL;Acc:Q9LR71]	10.21	10.77	8.97	9.94	10.97	9.22	8.3	7.77	5.72	5.4	5.91	5.52	5.17	5.39	5.16	5.01	5.4	5.25
AT1G03530	ATNAF1	NAF1 [Source:UniProtKB/TrEMBL;Acc:A0A178WI11]	12.64	14.38	15.88	15.24	15.74	16.98	12.24	14.14	12.72	23.43	24.34	24.34	17.69	17.35	18.84	12.26	13.2	12.79
AT1G03540	PCMP-E4	Pentatricopeptide repeat-containing protein At1g03540 [Source:UniProtKB/Swiss-Prot;Acc:Q9LR69]	0.38	1.57	2.02	0.71	1.55	1.04	1.88	2.63	2.68	2.17	2.51	3.19	1.99	1.87	2.26	1.59	2.24	2.05
AT1G03545		Potential natural antisense gene, locus overlaps with AT1G03550 [Source:TAIR;Acc:AT1G03545]	1.35	2.11	1.68	2.53	1.98	2.29	2.12	2.2	1.62	2.66	2.43	2.21	2.18	2.16	2.41	1.87	1.77	1.94
AT1G03550	SCAMP2	Secretory carrier-associated membrane protein 2 [Source:UniProtKB/Swiss-Prot;Acc:Q9LR68]	16.49	20.94	17.31	19.75	17.5	15.88	12.84	13.76	11.24	13.41	15.06	16.71	11.19	12.92	11.05	15.67	13.87	14.16
AT1G03560		Pentatricopeptide repeat-containing protein At1g03560, mitochondrial [Source:UniProtKB/Swiss-Prot;Acc:Q9LR67]	4.13	7.67	6.89	7.06	6.91	7.13	7.53	7.15	7.9	7.16	7.75	8.69	8.27	7.26	8.34	7.18	8.15	7.47
AT1G03570		pre-tRNA [Source:TAIR;Acc:AT1G03570]	0	0	0	0	0	0	0	0	0	0	0	0	0	0	0	0	0	0
AT1G03590	PPC6-6	Probable protein phosphatase 2C 1 [Source:UniProtKB/Swiss-Prot;Acc:Q9LR65]	42.66	43.8	43.66	27.23	28.39	27.96	19.03	17.14	18.71	15	15	14.96	9.07	10.63	9.88	8.49	9.33	8.32
AT1G03600	PSB27-1	Photosystem II repair protein PSB27-H1, chloroplastic [Source:UniProtKB/Swiss-Prot;Acc:Q9LR64]	46.04	29.01	29.51	32.84	33.6	35.01	40.42	40.07	40.42	4.95	5.99	5.52	4.03	4.74	4.99	4.58	3.35	4.26
AT1G03610		Plant/protein (DUF789) [Source:UniProtKB/TrEMBL;Acc:Q8LF98]	4.04	4.52	5.28	3.91	3.85	3.42	4.99	4.85	4.39	5.12	5.11	5.26	5.9	5.82	6.15	9.35	8.55	8.22
AT1G03620		ELMO/CED-12 family protein [Source:TAIR;Acc:AT1G03620]	3.55	3.42	3.44	4.3	3.7	4.55	2.63	3.05	2.49	4.7	5.48	5.37	5.14	5.09	4.47	5.04	4.15	4.99
AT1G03630	PORC	Protochlorophyllide reductase C, chloroplastic [Source:UniProtKB/Swiss-Prot;Acc:O48741]	18.75	18.66	19.54	20.85	20.82	17.96	29.38	28.84	29.15	7.39	7.76	6.78	6.17	7.34	6.04	5.76	7.62	6.28
AT1G03640		pre-tRNA [Source:TAIR;Acc:AT1G03640]	0	0	0	0	0	0	0	0	0	0	0	0	0	0	0	0	0	0
AT1G03650		Acyl-CoA N-acyltransferases (NAT) superfamily protein [Source:UniProtKB/TrEMBL;Acc:Q8GWN1]	5.68	4.48	4.41	4.56	6.78	4.82	2.71	3.22	2.55	8.35	11.09	8.38	7.03	5.7	7.07	5.27	6.32	5.4
AT1G03660		Ankyrin-repeat containing protein [Source:UniProtKB/TrEMBL;Acc:F4I2G0]	0.11	0.24	0	0.19	0.68	0.11	0.27	0.12	0.34	0.29	0.47	0.46	0.79	0.65	0.58	0.08	0.34	0.26
AT1G03670		Ankyrin repeat family protein [Source:UniProtKB/TrEMBL;Acc:F4I2G1]	0	0.03	0	0	0	0	0	0	0	0	0.02	0.05	0	0.05	0	0.03	0	0
AT1G03680	ATHM1	Thioredoxin M1, chloroplastic [Source:UniProtKB/Swiss-Prot;Acc:O48737]	88.47	73.92	70.77	85.84	96.31	88.27	118.98	115.55	110.04	77.81	79.88	76.63	77.84	70.01	74.01	76.9	76.07	75.07
AT1G03687		DTW domain-containing protein [Source:UniProtKB/TrEMBL;Acc:F4I2G3]	15.56	13.85	12.49	13.17	14.53	14.24	14.54	15.29	14.95	14.63	13.31	13.47	10.58	11.29	13.59	11.79	11.81	12.91
AT1G03700		CASP-like protein 1C2 [Source:UniProtKB/Swiss-Prot;Acc:Q9LR57]	0.07	0.16	0.14	0	0	0.23	0	0	0.06	0	0	0	0	0	0.08	0.69	0.74	0.62
AT1G03710		Cystatin/monellin superfamily protein [Source:UniProtKB/TrEMBL;Acc:Q58G57]	76.68	74.55	69.83	66.35	71.87	68.3	51.9	54.27	50.32	83.89	84.95	78.27	87.15	79.13	81.89	87.03	83.2	87.02
AT1G03720		Cysteine proteinases superfamily protein [Source:UniProtKB/TrEMBL;Acc:Q9LR55]	1.33	0.46	0.7	0.44	0.81	0.66	0.28	0	0	0.32	0.25	0.22	0.08	0.13	0.15	0.42	0.15	0.13
AT1G03730		At1g03730 [Source:UniProtKB/TrEMBL;Acc:Q1ECK0]	20	22.47	22.22	19.03	16.79	18.14	13.71	13.15	14.33	10	9.98	10.31	7.82	9.14	7.5	5.75	5.77	6.4
AT1G03740		F21B7.34 [Source:UniProtKB/TrEMBL;Acc:Q9LR53]	6.66	10.96	11.13	7.04	8.26	8.1	7.58	7.63	6.77	6.82	7.84	7.36	7.63	7.4	6.49	6.65	6.79	6.77
AT1G03743		snoRNA [Source:TAIR;Acc:AT1G03743]	0	0	0	0	0	0	0	0	0	0	0	0	0	0	0	0	0	0
AT1G03746		snoRNA [Source:TAIR;Acc:AT1G03746]	0	0	0	0	0	0	0	0	0	0	0	0	0	0	0	0	0	0
AT1G03750	SWI2	Switch 2 [Source:UniProtKB/Swiss-Prot;Acc:F4I2H2]	3.35	4.9	5.07	5.5	5.45	6.13	5.44	6.12	6.65	9.02	9.81	10.41	12.56	12.79	11.74	13.56	13.4	12.3
AT1G03760		Prefoldin chaperone subunit family protein [Source:UniProtKB/TrEMBL;Acc:Q8GWP1]	20.24	17.53	16.61	18.03	18.56	17.47	9.99	11.37	11.58	17.14	18.16	17.5	14.08	13.41	14.22	12.88	12.25	11.85
AT1G03770	RING1B	RING 1B [Source:UniProtKB/TrEMBL;Acc:F4I2H4]	12.18	14.53	14.29	11.48	13.79	13.17	12.7	13.07	12.69	20.73	20.84	20.09	24.18	26.15	25.1	29.24	28.65	28.04
AT1G03780	TPX2	Protein TPX2 [Source:UniProtKB/Swiss-Prot;Acc:F4I2H7]	4.19	5.84	5.65	12.68	14.36	13.88	26.06	27.73	25.47	21.25	20.66	21.02	30.9	30.82	32.36	30.2	29.23	28.21
AT1G03790	SOM	Zinc finger CCCH domain-containing protein 2 [Source:UniProtKB/Swiss-Prot;Acc:Q9ZWA1]	0.03	0.03	0.05	0	0.02	0	0	0	0	0	0.02	0	1.13	0.69	0.77	1.14	0.88	0.96
AT1G03800	ERF10	At1g03800 [Source:UniProtKB/TrEMBL;Acc:Q08A59]	3.93	3.37	1.95	1.07	0.66	0.68	0.16	0.13	0.26	0.28	0.27	0.26	0.41	0.22	0.3	0.26	0.25	0.31
AT1G03810		F11M21.26 protein [Source:UniProtKB/TrEMBL;Acc:Q9ZWA3]	0	0	0	0	0	0	0	0	0	0	0	0	0	0	0	0	0	0
AT1G03820		At1g03820 [Source:UniProtKB/TrEMBL;Acc:Q9ZWA4]	0	0	0.1	0	0	0	0	0	0.04	0.05	0	0.05	0	0.09	0.05	0	0	0.09
AT1G03830		Guanylate-binding family protein [Source:UniProtKB/TrEMBL;Acc:F4I2I5]	7.57	9.73	11.36	11.16	10.98	10.8	13.61	14.38	14.2	16.95	16	17.5	18.14	18.66	18.68	16.26	16.16	16.66
AT1G03840	MGP	Uncharacterized protein At1g03840 (Fragment) [Source:UniProtKB/TrEMBL;Acc:C0SUS5]	0.12	0.34	0.22	0.25	0.43	0.85	0.67	0.65	0.7	0.14	0.05	0.05	0.06	0.07	0.08	0.07	0.19	0.18
AT1G03850		Glutaredoxin family protein [Source:TAIR;Acc:AT1G03850]	0.4	0.26	0	0.21	0.57	0.62	0.25	0.67	0.3	0.29	0.19	0.54	0.47	0.31	0.44	0.9	0.95	1.21
AT1G03860	PHB2	PHB2 [Source:UniProtKB/TrEMBL;Acc:A0A178WBG3]	85.77	78.45	72.92	84.56	79.69	79.58	53.05	60.22	58.4	115.74	123.83	116.85	89.14	91.84	89.26	84.47	83.31	83.31
AT1G03870	FLA9	At1g03870 [Source:UniProtKB/TrEMBL;Acc:B3LF88]	16.07	13.94	15.39	6.12	6.31	6.02	1.17	1.06	1.32	2.55	1.83	1.84	3.27	3.68	3.59	6.04	6.12	6.12
AT1G03880	CRB	CRU2 [Source:UniProtKB/TrEMBL;Acc:A0A178W5K4]	0.03	0	0	0.21	0.14	0.03	1.6	1.64	1.36	5.95	4.71	4.29	17.36	22.62	17.43	56.9	59.86	58.59
AT1G03890	CRD	12S seed storage protein CRD [Source:UniProtKB/Swiss-Prot;Acc:Q9ZWA9]	0.16	0	0.07	0.15	0.03	0.14	0.32	0.04	0.12	1.12	0.53	0.59	1.65	1.85	2.12	7.21	6.01	6.1
AT1G03900	ATNAP4	NAP4 [Source:UniProtKB/TrEMBL;Acc:A0A178WMR3]	90.69	68	67	87.91	79.51	80.84	74.05	78.08	71.57	89.97	80.88	78	88.8	83.23	82.41	87.48	96.69	91.51
AT1G03905	ABCI19	ABC transporter I family member 19 [Source:UniProtKB/Swiss-Prot;Acc:Q3EDJ0]	12.3	10.02	10.24	8.11	10.51	9.3	7.26	8.98	7.97	7.93	8.49	6.87	7.51	8.13	6.88	8.6	6.61	7.85
AT1G03910	CTN	Cactin [Source:UniProtKB/Swiss-Prot;Acc:F4I2J8]	21.78	31.5	33.23	32.23	31.73	32.05	37.48	39.67	37.81	43.88	44.78	45.22	46.42	44.39	42.63	42.29	43.43	42.19
AT1G03920		Non-specific serine/threonine protein kinase [Source:UniProtKB/TrEMBL;Acc:F4I2K0]	3.02	3.7	3.78	19.52	19.19	18.47	135.83	148.35	141.9	271.98	269.88	287.36	97.3	101.65	93.35	72.47	71.2	71.29
AT1G03930	CKL9	Casein kinase 1-like protein 9 [Source:UniProtKB/Swiss-Prot;Acc:Q9ZWB3]	8.78	9.8	9.85	9.56	12.03	10.66	9.21	11.21	10.89	15.48	15.71	17.5	16.21	15.12	16.7	18.8	18.21	18.51
AT1G03935		snoRNA [Source:TAIR;Acc:AT1G03935]	0	0	0	0	0	0	0	0	0	0	0	0	0	0	0	0	0	0
AT1G03940	3AT1	Coumaroyl-CoA:anthocyanidin 3-O-glucoside-6''-O-coumaroyltransferase 1 [Source:UniProtKB/Swiss-Prot;Acc:Q9ZWB4]	9.12	7.7	6.49	5.71	5.82	6.74	7.59	4.98	6.06	10.76	5.43	8.57	6.1	6.8	4.36	5.2	6.52	7.09
AT1G03950	VPS2.3	Vacuolar protein sorting-associated protein 2 homolog 3 [Source:UniProtKB/Swiss-Prot;Acc:Q941D5]	32.03	27.05	25.6	31.96	30.4	26.8	14.34	14.79	16.44	20.76	21.45	21.63	18.86	19.62	17.11	21.19	21.72	18.83
AT1G03960	B''EPSILON	Probable serine/threonine protein phosphatase 2A regulatory subunit B''epsilon [Source:UniProtKB/Swiss-Prot;Acc:Q84JI6]	12.12	12.88	14.15	11.89	14.39	14.02	13.32	13.75	14.05	16.24	16.52	16.86	26.63	26.22	26.03	30.16	29.49	28.78
AT1G03970	GBF4	At1g03970 [Source:UniProtKB/TrEMBL;Acc:Q2HIT6]	46.01	46.96	49.03	62.07	55.74	58.73	46.68	46.55	47.73	47.06	48.08	48.74	43.17	45.47	45.24	44.04	49.31	45.46
AT1G03980	ATPCS2	phytochelatin synthase 2 [Source:TAIR;Acc:AT1G03980]	2.18	1.71	2.03	0.87	1.73	1.77	1.19	0.86	1.01	1.13	1.98	1.95	1.11	1.29	1.3	1.25	1.19	1.27
AT1G03982	RIC8	CRIB domain-containing protein RIC8 [Source:UniProtKB/Swiss-Prot;Acc:Q9ZWB8]	0	0	0	0	0.04	0.17	0	0	0	0	0	0	0.04	0.04	0	0	0.08	0
AT1G03987		-	0	0	0	0	0	0	0	0	0	0	0	0	0	0	0	0	0	0
AT1G03990	FAO1	Long-chain-alcohol oxidase FAO1 [Source:UniProtKB/Swiss-Prot;Acc:Q9ZWB9]	6.83	8.77	7.13	6.94	8.15	7.2	4.94	6.33	8.17	5.39	6.59	7.2	6.93	9.2	10.65	11.31	10.96	9.99
AT1G03993		-	0	0	0	0	0	0	0	0	0	0	0	0	0	0	0	0	0	0
AT1G03997		-	0	0	1.03	0	0	0	0.9	0	0.85	0	0	0	1.06	0	0.93	0	1.85	0
AT1G04000		F21M11.6 protein [Source:UniProtKB/TrEMBL;Acc:Q9ZWC0]	87.11	67.76	70.59	55.65	52.82	48.44	31.68	32.67	29.1	37.57	37.42	36.14	27.78	27.07	30.31	24.4	24.48	23.71
AT1G04003		-	0	0	0	0	0	0	0	0	0	0	0	0	0	0	0	0	0	0
AT1G04007		-	7.12	7.52	6.34	5.53	7.66	5.54	4.4	5.33	2.59	12.59	8.24	8.55	6.85	10.11	9.19	10.57	14.33	9.77
AT1G04010	PSAT	PSAT1 [Source:UniProtKB/TrEMBL;Acc:A0A178W9Q7]	9.54	12.04	13.35	8.24	9.06	9.25	5.75	7.31	5.29	6.59	7.54	6.81	5.74	4.98	4.6	2.9	3.73	3.84
AT1G04013		-	0	0	0	0	0	4.89	3.19	0	1.53	0	0	0	3.84	0	1.63	0	0	1.69
AT1G04017		-	13.58	23.77	12.49	5.2	24.39	4.16	3.7	5.53	9.18	21.25	13.59	0	15.77	3.74	9.23	18.26	20.7	10.43
AT1G04020	ATBARD1	ROW1 [Source:UniProtKB/TrEMBL;Acc:A0A384KH31]	11.14	13.62	12.68	11.31	13.86	11.99	12.58	13.45	11.93	22.94	23.52	22.02	24.37	23.49	24.03	20.12	21.15	22.48
AT1G04023		-	0	0	0	0	0	0	0	0	0	0	0	3.51	0	0	0	0	0	0
AT1G04027		-	0	0	0	0	0	0	0	0	0	0	0	0	0	0	0	0	0	0
AT1G04030		unknown protein; BEST Arabidopsis thaliana protein match is: unknown protein (TAIR:AT5G44040.1); Ha. [Source:TAIR;Acc:AT1G04030]	16.91	20.4	19.74	37.7	38.8	36.67	54.27	57.38	53.84	66.22	61.79	66.08	76.33	76.15	75.14	76.3	73.92	73.67
AT1G04033		-	0	0	0	0	0	0	0	0	0	0	0	0	0	0	0	0	0	0
AT1G04037		-	0	0	0	0	0	0	0	0	0	0	1.73	0	0	1.72	0	0	0	0
AT1G04040		At1g04040/F21M11_2 [Source:UniProtKB/TrEMBL;Acc:Q9ZWC4]	2.52	1.6	1.76	2.47	1.48	2.26	2.79	3.08	2.4	5.06	4.43	3.7	5.66	4.33	4.73	6.81	6.31	4.48
AT1G04043		-	0	0	0	0	0	0	0	0	0	0	0	0	0	0	0	0	0	0
AT1G04047		-	5.92	6.55	5.17	5.13	3.22	3.17	4.46	7.07	2.75	4.7	7.92	2.88	6.07	7.7	6.12	6.08	5.95	6.36
AT1G04050	SUVR1	Probable inactive histone-lysine N-methyltransferase SUVR1 [Source:UniProtKB/Swiss-Prot;Acc:Q946J2]	4.26	5.39	5.77	4.67	4.83	5.24	5.91	6.02	5.92	4.08	4.27	5.39	5.43	5.09	5.13	5.72	5.83	5.55
AT1G04053		-	2.95	2.52	1.86	2.93	0.97	2.26	1.93	0.31	1.07	2.85	3.36	2.93	1.88	1.02	2.68	2.88	1.5	2.03
AT1G04057		-	0	0	0	0	0	0	0	0	0	0	0	0	0	0	0	0	0	0
AT1G04063		-	0	0	0	0	0	0	0	0	0	0	0	0	0	0	0	0	0	0
AT1G04067		-	1.93	5.23	3.37	2.67	8.28	6.08	4.06	4.47	4.62	3.38	5.73	3.5	3.62	3.97	4.3	5.35	3.04	4.88
AT1G04070	TOM9-1	Mitochondrial import receptor subunit TOM9-1 [Source:UniProtKB/Swiss-Prot;Acc:O64497]	72.73	50.31	44.57	62.48	58.04	62.02	37.73	39.14	40.01	77.03	82.78	85.91	65.29	65.32	55.11	57.05	54.81	56.02
AT1G04073		-	0	0	0	1.19	0	2.65	0	0	4.33	0	0	0	0	0	1.08	0	2.33	0
AT1G04077		-	2.56	1.91	1.33	12.27	14.3	10.4	63.21	77.04	62.94	23.3	21.72	23.92	130.4	136.47	132.16	259.85	286.65	294.57
AT1G04080	PRP39	Tetratricopeptide repeat (TPR)-like superfamily protein [Source:UniProtKB/TrEMBL;Acc:F4I448]	67.62	67.96	69.17	71.17	73.94	71.55	71.61	79.19	73.27	96.51	100.54	105.15	105.44	111.1	112.06	111.63	112.81	113.95
AT1G04083		-	0.94	0	1.17	4.64	4.49	0	1.02	0	1.93	9.85	6.27	7.57	8.42	7.17	4.2	8.06	6.25	0
AT1G04087		-	0	0	0	0	0	0	0	0	0	0	0	0	0	0	0	0	0	0
AT1G04090		At1g04090 [Source:UniProtKB/TrEMBL;Acc:Q501D1]	1.35	1.56	1.47	1.33	1.48	1.7	2.05	2.49	2.5	2.26	2.65	2.83	2.57	2.9	2.18	4.45	4.65	4.51
AT1G04093		-	0.16	0	0	0	0	0.36	0.17	1.06	0.79	0.2	1.33	1.33	0.58	0.65	0.18	0.75	0.53	0.34
AT1G04097		-	0	0	0	0	0	0.6	0	1.66	0	0	1.15	0.68	0.66	0	0	0	0	0
AT1G04100	IAA10	Auxin-responsive protein IAA10 [Source:UniProtKB/Swiss-Prot;Acc:Q38828]	8.18	6.81	6.27	6.3	5.95	6.68	5.99	4.84	5.19	7.98	9.17	6.46	6.55	8.03	7.1	9.66	9.16	9.61
AT1G04103		-	0	0	0	0.31	0	0.22	0.14	0.46	0.37	0	0.13	0.15	2.79	2.99	1.96	1.64	0.72	1.39
AT1G04105		Uncharacterized protein (Fragment) [Source:UniProtKB/TrEMBL;Acc:A0A1P8ASG6]	0	0	0	0	0	0	0	0	0	0	0	0	0	0.24	0	0	0	0
AT1G04110	SBT1.2	SDD1 [Source:UniProtKB/TrEMBL;Acc:A0A178WPN6]	0.2	0.2	0.26	0.36	0.21	0.23	1.07	0.95	1.16	0.94	0.8	0.83	0.51	0.57	0.43	0.33	0.53	0.44
AT1G04117		-	3.26	4.38	4.27	2.95	5.21	5.31	3.82	3.69	3.1	5.57	4.24	5.1	3.91	3.73	5.07	2.82	3.65	3.43
AT1G04120	ABCC5	MRP5 [Source:UniProtKB/TrEMBL;Acc:A0A178WGC2]	14.5	26.96	28.66	21.8	23.76	23.56	40.35	45.76	42.64	42.51	41.57	43.44	51.61	57.63	53.86	53.61	52.96	55.6
AT1G04123		-	0	0.49	1.54	1.46	0	0.37	0	0.75	0	0.68	1.06	3.98	0	1.19	2.55	0	0	0.71
AT1G04127		-	0	0	0	0	0	0	0	0	0	0	0	0	4.54	0	0	2.14	0	0
AT1G04130	TPR2	Tetratricopeptide repeat (TPR)-like superfamily protein [Source:UniProtKB/TrEMBL;Acc:F4I456]	17.47	18.11	17.72	19.82	15.75	18	13.75	12.06	12.73	20.64	17.68	16.91	17.02	20.18	17.82	16.25	17.11	17.48
AT1G04133		-	0	0	0	0	0	0	0.5	0	0	0	0	0	0.28	0	0.27	0	0	0.25
AT1G04137		-	0	0	0	0	0	0	0	0	0	0	0	0	0	0	0	0	0.16	0.47
AT1G04140		Transducin family protein / WD-40 repeat family protein [Source:UniProtKB/TrEMBL;Acc:F4I458]	29.77	38.81	40.83	27.19	31.53	31.57	41.91	42.57	42.19	43.14	42.75	46.32	43.08	43.66	43.76	41.12	40.58	41.18
AT1G04143		-	0	0	0	0	0	0	0	0	0	0	0	0	0	0	0	0	0	0
AT1G04147		-	0	3.64	0	0	0	0	0	0	0.92	0	0	0	0	1.95	2.01	2.2	1.99	0
AT1G04150		C2 calcium/lipid-binding plant phosphoribosyltransferase family protein [Source:UniProtKB/TrEMBL;Acc:O64492]	1.01	1.39	1.71	2.03	1.64	2.19	4.26	4.94	4.86	2.79	2.85	2.77	1.47	1.28	1.32	0.91	1.23	1.02
AT1G04153		-	0.39	0.23	0.64	0	1.02	1.08	1.62	0.26	1.5	0	0.4	0.23	0.23	0	0.22	0	0	0
AT1G04157		-	0	0	0	0	0	0	0	0	0	3.39	0	0	0	5.72	2.69	0	0	0
AT1G04160	XI-B	Myosin-8 [Source:UniProtKB/Swiss-Prot;Acc:F4I460]	2.02	4.03	3.81	2.86	3.39	3.43	5.31	6.24	5.8	3.59	3.46	3.94	3.57	3.55	3.68	3.1	3.14	3.35
AT1G04163		-	0	0	0	0	0	0	0	0	0	0	0	0	0	0	0	0	0	0
AT1G04167		-	0	0	0	0	0	0	0	0	0	0	0	0	0	0	0	0	0	0
AT1G04170	EIF2 GAMMA	Eukaryotic translation initiation factor 2 gamma subunit [Source:UniProtKB/TrEMBL;Acc:O64490]	90.44	94.83	88.82	97.93	90.71	87.34	92.41	93.12	90.54	119.51	118.83	121.4	113.32	112.87	113.77	101.77	104.79	103.8
AT1G04173		-	0	0	0	0	0	0	0	0	0	0	0	0	0	0	0	0	0	0
AT1G04177		-	0	0	0	0	0	0	0	0	0	0	0	0	0	0	0	0	0	0
AT1G04180	YUC9	Flavin-containing monooxygenase [Source:UniProtKB/TrEMBL;Acc:A0A178WB22]	0.12	0.1	0	0.1	0.03	0.06	0.18	0.1	0.08	0.03	0	0	0	0	0.03	0.13	0	0.06
AT1G04183		-	6.68	0	0	10.57	2.44	4.34	3.54	4.26	2.67	0	0	0	0	0	0	0	0	0
AT1G04187		-	0	0	0	0	0	0	0	0	0	0	0	0	0	0	0	0	0	0
AT1G04190	TPR3	TPR3 [Source:UniProtKB/TrEMBL;Acc:A0A178WLS7]	39.93	38.6	39.72	53.66	48.34	49.45	44.26	46.05	43.6	60.12	59.51	61.61	60.67	61.38	63.87	58.41	59.65	60.04
AT1G04193		-	0	0	0	0	0	0	0	0	0	0	0	0	0	0	0	0	0	0
AT1G04197		-	0	0	0	0	0	0	0	0	0	0	0	0	0	0	0	0	0	0
AT1G04200		Dyggve-melchior-clausen syndrome protein [Source:UniProtKB/TrEMBL;Acc:Q8RWV1]	23.84	34.69	34.44	26.22	29.43	28.16	22.68	26.96	24.2	27.65	28.32	27.94	33.28	32.5	32.66	30.44	31.84	30.14
AT1G04203		-	0	0	0	0	0	0	0	0	0	0	0	0	0	0	0	0	0	0
AT1G04207		-	0	0	0	0	0	0	0	0	0	0	0	0	0	0	0	0	0	0
AT1G04210		At1g04210 [Source:UniProtKB/TrEMBL;Acc:O64486]	10.94	17.41	19.52	15.21	16.56	17.06	21.58	24.6	21.76	24.74	24.52	26.19	25.54	24.51	25.19	22.89	22.98	23.43
AT1G04213		-	0	0	0	0	0	0	0	0	0	0	0	0	0	0	0	0	0	0
AT1G04217		-	0	0	0	0	0	0	0	0	0	0	0	0	0	0	0	0	0	0
AT1G04220	KCS2	3-ketoacyl-CoA synthase 2 [Source:UniProtKB/Swiss-Prot;Acc:Q5XEP9]	36.34	36.62	35.9	30.72	30.07	28.71	30.63	31.67	28.58	57.47	49.45	56.49	24.54	25.32	25.78	47.42	45.76	45.79
AT1G04223		-	0	0	0	0	0	0	0	0	0	0	0	0	0	0	0	0	0	0
AT1G04227		-	0	0	0	0	0	0	0	0	0	0	0	0	0	0	0	0	0	0
AT1G04230		At1g04230 [Source:UniProtKB/TrEMBL;Acc:Q94K10]	23.06	20.12	20.8	20.95	20.76	21.7	18.93	21.13	20.96	23.55	23.02	24.16	22.92	21.98	22.77	22.56	20.26	21.85
AT1G04233		-	32.13	29.62	17.49	24.38	24.73	14.11	32.03	26.51	18.49	22.1	38.2	25.01	26.48	23.29	15.96	30.61	19.02	35.57
AT1G04237		-	0	0	0	0	0	0	0	0	0	0	0	0	0	0	0	0	0	0
AT1G04240	SHY2	AUX/IAA transcriptional regulator family protein [Source:TAIR;Acc:AT1G04240]	1.3	1.43	1.5	1.04	0.73	1.4	0.84	0.78	0.88	0.62	0.26	0.24	0.27	0.66	0.5	0.22	0.54	0.47
AT1G04243		-	0	0	0	0	0	0	0	0	0	0	0	0	0	0	0	0	0	0
AT1G04247		-	1.92	4.43	5.64	2.47	4.11	4.04	3.57	4.2	3.93	5.57	6.34	5.77	3.32	3.69	4.11	7.8	7.3	8.08
AT1G04250	IAA17	Auxin-responsive protein IAA17 [Source:UniProtKB/Swiss-Prot;Acc:P93830]	1.14	0.97	1.37	0.45	0.94	0.74	1.77	2.14	2.01	0.22	0.3	0.25	0.09	0.29	0.12	0.25	0.2	0.07
AT1G04253		-	0	0	0	0	0	0	0	0	0	0	0	0	0	0	0	0	0	0
AT1G04257		-	0	1.93	3.55	8.6	3.42	0	1.5	0	7.2	9.26	10.97	5.76	16.29	6.21	6.16	22.3	21.56	11.17
AT1G04260	PRA1D	PRA1 family protein D [Source:UniProtKB/Swiss-Prot;Acc:P93829]	30.25	25.86	24.77	30.56	27.27	26.09	28.07	27.07	25.31	22.16	23.44	24.04	21.1	22.65	21.63	22.02	21.25	18.83
AT1G04263		-	0	0	0	0	0	0	0	0	0	0	0	0	0	0	0	0	0	0
AT1G04267		-	0	0	0	0	0	0	0	0	0	0	0	0	0	0	0	0	0	0
AT1G04270	RPS15A	40S ribosomal protein S15-1 [Source:UniProtKB/Swiss-Prot;Acc:Q08112]	712.33	622.33	609.92	737.44	729.32	700.58	556.29	582.09	550.75	670.08	672.7	653.13	583.6	542.97	542.87	537.9	539.56	563.45
AT1G04273		-	0	0	0	0	0	0	0	0	0	0	0	0	0	0	0	0	0	0
AT1G04277		-	0	0	0	0	0	0	0	0	0	0	0	0	0	0	0	0	0	0
AT1G04280		p-loop containing nucleoside triphosphate hydrolases superfamily protein [Source:UniProtKB/TrEMBL;Acc:Q0WUY1]	0.5	0.75	0.48	0.54	0.6	0.53	0.29	0.62	0.23	0.51	0.47	0.37	0.51	0.34	0.45	0.28	0.36	0.58
AT1G04283		-	0	0	0	0	0	0	0	0	0	0	0	0	0	0	0	0	0	0
AT1G04287		-	0	0	0	0	0	0	0	0	0	0	0	0	0	0	0	0	0	0
AT1G04290		F19P19.27 protein [Source:UniProtKB/TrEMBL;Acc:P93828]	28.9	18.88	20.93	18.93	19.4	18.21	13.49	14.18	16.52	19.23	17.18	14.07	18.6	18.39	21.17	16.12	22.7	17.86
AT1G04293		-	0	0	0	0	0	0	0	0	0	0	0	0	0	0	0	0	0	0
AT1G04295		other RNA [Source:TAIR;Acc:AT1G04295]	0.52	0.55	0.17	0	0.83	0.54	0.72	0.19	1.09	0.19	0.16	0.95	0.2	0.46	0.18	1.32	1.24	0.83
AT1G04297		-	0.6	0.23	0.21	0.6	0.41	1.32	0.21	0.12	0.57	0.96	0.6	1.36	0.94	0.88	0.89	0.79	1.18	0.91
AT1G04300	TRAF1B	TNF receptor-associated factor homolog 1b [Source:UniProtKB/Swiss-Prot;Acc:A8MQL1]	25.46	39.83	39.34	37.01	38.93	39.36	44.36	53	51.52	61.15	59	65	67.21	69.2	71.93	66.4	66.15	66.32
AT1G04303		-	0	0	0	4.56	0	0	0	0	1.92	4.97	2.09	2.59	4.85	0	6.06	2.28	2.04	8.51
AT1G04307		-	0	0	0.69	0	0.04	0	1.29	0.41	0.8	0.61	0.21	0	0.83	0	0	0	0.22	0.43
AT1G04310	ERS2	Ethylene response sensor 2 [Source:UniProtKB/Swiss-Prot;Acc:P93825]	10.04	13	14.07	14.8	15.04	16.29	19.1	21.12	19.47	27.19	25.92	29.15	32.11	32.89	32.44	35.52	35.26	34.98
AT1G04313		-	0	0	0	0	0	0	0	0	0	0	0	0	0	0.42	0.9	0	0	0
AT1G04320		pre-tRNA [Source:TAIR;Acc:AT1G04320]	0	0	0	0	0	0	0	0	0	0	0	0	0	0	0	0	0	0
AT1G04323		-	0	0	0	0	0	0	0	0	0	0	0	0	0	0	0	0	0	0
AT1G04327		-	0	0	0	0	0	0	0	0	0	0	0	0	0	0	0	0	0	0
AT1G04330		At1g04330 [Source:UniProtKB/TrEMBL;Acc:O22691]	0.09	0	0	0	0.28	0.1	0.19	0.11	0.17	0	0	0.41	0.32	1.15	1.21	1.23	0.59	2.3
AT1G04333		-	0	0	0	0	0	0	0	0	0	0	0	0	0	0	0	0	0	0
AT1G04337		-	0	0	0	0	0	0	0	0	0	0	0	0	0	0.35	0	0	0	0
AT1G04340		At1g04340/F19P19_23 [Source:UniProtKB/TrEMBL;Acc:O22690]	50.32	49.63	54.22	42.86	53.07	48.28	40.15	41.46	42.77	55.6	60.69	49.83	50.9	49.75	45.7	47.19	48.83	47.92
AT1G04343		-	26.92	18.77	18.23	29.69	24.07	24.35	13.17	8.27	10.32	12.5	10.69	8.19	8.22	5.12	10.73	7.85	7.9	5.87
AT1G04347		-	1.53	1.23	1.43	0.92	0	0	1.33	3.51	1.98	0.93	2.36	0.91	2.74	2.55	1.13	1.77	3.03	3.21
AT1G04350		1-aminocyclopropane-1-carboxylate oxidase homolog 6 [Source:UniProtKB/Swiss-Prot;Acc:P93824]	3.65	3.65	4.06	3.89	3.71	3.72	2.77	2.65	2.91	2.36	2.41	2.63	3.01	2.99	2.67	3.25	3.32	3.26
AT1G04353		-	2.42	2.44	2.58	2.06	2	2.72	4.13	5.13	3.99	3.89	3.53	4.08	3.34	4.22	3.22	2.68	3.53	3.48
AT1G04357		-	0.32	1.48	0.68	0.57	0.82	0.7	0.98	1.01	0.3	1.71	1.28	0.91	1.12	2.02	1.4	1.79	0.85	0.97
AT1G04360	ATL1	RING-H2 finger protein ATL1 [Source:UniProtKB/Swiss-Prot;Acc:P93823]	0.27	0.36	0.25	0.22	0.21	0.18	0.27	0.3	0.2	0.54	0.34	0.26	0.34	0.26	0.5	0.89	0.89	1.14
AT1G04363		-	0	0	0	0	0	0	0	0	0	2.21	0	0	0	0	0	0	0	0
AT1G04367		-	0.1	0	0	0	0	0	0	0	0.09	0	0	0	0	0	0	0	0	0
AT1G04370	ERF14	Uncharacterized protein At1g04370 (Fragment) [Source:UniProtKB/TrEMBL;Acc:C0SUS6]	0	0	0	0	0	0	0	0	0	0	0	0	0	0	0	0	0.09	0.08
AT1G04373		-	0	0	0	0	0	0	0	0	0	0	0	0	0	0	0	0	0	0
AT1G04377		-	0.54	0	0	0	0	0	0	0	0	0	0	0	0	0	0	0	0	0
AT1G04380		1-aminocyclopropane-1-carboxylate oxidase homolog 7 [Source:UniProtKB/Swiss-Prot;Acc:P93821]	25.28	19.18	19.49	82.83	84.02	82.68	124.05	128.71	120.48	128.6	126.82	130.51	203.44	200.87	205.73	278.52	262.81	271.84
AT1G04383		-	0	0	0	0	0	0	0	0	0	0	0	0	0	0	2.02	0	0	0
AT1G04387		-	0	0.24	0.45	0.24	0	0.45	0	0	0.2	0.5	0.21	0	0.24	0	0.45	0	0	0
AT1G04390		BTB/POZ domain-containing protein At1g04390 [Source:UniProtKB/Swiss-Prot;Acc:P93820]	2.88	5.08	4.69	2.88	3.75	4.06	4.89	4.41	4.4	5.35	5.12	5.6	6.25	5.78	5.41	6.58	6.07	5.49
AT1G04393		-	0	0	0	0	0	0	0	0	0	0	0.28	0	0	0	0	0	0	0
AT1G04397		-	0	0	0	0	0	0	0	0	0	0	0	0	0	0	0	0	0	0
AT1G04400	CRY2	Cryptochrome-2 [Source:UniProtKB/Swiss-Prot;Acc:Q96524]	15.75	17.37	18.83	14.23	15.07	16.67	22.41	24.96	21.17	19.89	20.07	21.49	21.58	21.41	21.72	23.76	21.1	21.61
AT1G04403		-	0	0	0	0	0	0	0	0	0	0	0	0	0	0	0	0	0	0
AT1G04407		-	0	0	0	0	0	0	0	0	0	0	0	0	0	0	0	0	0	0
AT1G04410	MDH1	Malate dehydrogenase [Source:UniProtKB/TrEMBL;Acc:A0A178W4H0]	534.2	477.71	454.26	458.12	461	450.18	565.34	586.33	557.4	410.59	408.68	423.33	466.84	458.78	469.59	466.94	477.36	486.05
AT1G04413		-	1.1	0	0	0	0	0.41	1.16	1.07	0.72	1.81	0	0.45	0	0.37	0.41	0	0.4	0
AT1G04417		-	0	0.45	0.84	0.44	0.8	0	0	0	0.36	1.36	0	1.35	0	0	0	0	0	0
AT1G04420		NAD(P)-linked oxidoreductase superfamily protein [Source:UniProtKB/TrEMBL;Acc:Q8VZ23]	19.1	16.57	17.45	18.53	17.59	18.57	23.48	26.16	23.92	24.05	21.61	21.45	21.99	20.62	21.71	19.83	21.27	23.02
AT1G04423		-	0	0	0	0	0	0	0	0	0	0	0	0	0	0	0	0	0	0
AT1G04425		other RNA [Source:TAIR;Acc:AT1G04425]	5.87	5.27	7.83	74.48	63.12	63.98	152.7	159.54	149.52	179.93	190.01	204.73	334.79	276.91	273.42	262.17	277.98	284.72
AT1G04427		-	1.53	3.82	2.7	0	0	0	4.67	0.89	0	4.22	0.84	3.77	2.29	2.63	0	1.44	6.16	2.26
AT1G04430		Probable methyltransferase PMT8 [Source:UniProtKB/Swiss-Prot;Acc:Q940J9]	27.03	30.58	31.95	20.05	21.8	21.02	25.73	26.28	26.68	19.04	18.29	18.46	18.05	18.69	18.52	13.67	14.37	15.33
AT1G04433		-	1.37	3.1	0.72	2.78	2.32	2.09	1.47	8.02	9.91	1	1.76	0.95	3.76	2.52	4.29	4.45	3.12	1.79
AT1G04437		-	0	0	0	0	0	2.82	0	0	0	0	0	0	1.64	0	0	1.56	0	0
AT1G04440	CKL13	Casein kinase 1-like protein 13 [Source:UniProtKB/Swiss-Prot;Acc:Q5XF24]	20.44	21.81	23.09	23.45	26.18	24.52	25.68	28.17	27.88	32.29	30.64	32.94	34.84	36.04	35.09	41.97	42.25	41.1
AT1G04443		-	0	0	0	0	0	0	0	0	0	0	0	0	0	0	0	0	0	0
AT1G04445		C2H2-like zinc finger protein [Source:TAIR;Acc:AT1G04445]	24.19	20.41	22.54	5.58	4.77	4.08	0.1	0.67	0.15	4.02	3.08	2.73	1.26	2.39	1.39	2.93	1.99	2.87
AT1G04447		-	0	0	0	0	0	0	0	0	0	0	0	0	0	0	0	0	0	0
AT1G04450	RIC3	CRIB domain-containing protein RIC3 [Source:UniProtKB/Swiss-Prot;Acc:F4I5N6]	0	0.06	0	0.3	0	0.11	0	0	0	0.06	0.1	0	0.17	0.1	0	0.06	0.05	0
AT1G04453		-	0	0	0	0	0	0	0.2	0	0	0	0	0	0	0	0	0	0.21	0
AT1G04455		-	1.87	2.88	1.78	0.46	0.42	0.43	0.41	0	1.14	1.91	3.24	1.9	1.87	3.54	1.29	0.45	1.26	1.24
AT1G04463		-	0	0	0	0	0	0	0	0	4.29	0	0	0	0	0	0	0.97	0	0
AT1G04467		-	0.37	0.65	1.01	1.32	0.19	0.41	0.77	0.48	0.71	0.89	0.19	0.65	1.09	0.55	1.23	0.63	0.2	1.14
AT1G04470		F19P19.6 protein [Source:UniProtKB/TrEMBL;Acc:P93812]	0.14	0.12	0.18	0.04	0.04	0.05	0.04	0.01	0	0.03	0.06	0.04	0.01	0	0.07	0.07	0.1	0.06
AT1G04473		-	1.08	0.64	1.38	0.86	0.75	1.2	1.31	0.24	1.04	0.44	1.47	1.26	0.43	1.25	0.8	2.06	0.97	0.56
AT1G04477		-	0.61	1.12	1.73	1.47	1.31	5.43	2.87	1.29	1.49	1.12	1.27	4.06	4.4	1.54	2.03	1.42	1.65	1.94
AT1G04480	RPL23A	60S ribosomal protein L23 [Source:UniProtKB/Swiss-Prot;Acc:P49690]	437.93	388.14	377.15	473.51	452.48	445.5	323.13	307.17	320.92	364.6	398.93	381.65	333.38	309.13	304.66	281.7	306.77	306.21
AT1G04483		-	2.33	0	0	0	6.01	0	0	0	0	0	2.7	3.37	0	0	0	0	2.61	0
AT1G04487		-	1.49	3.61	2.61	0	1.34	2.34	1.87	1.48	1.57	0.64	1.56	0	0.37	0.89	0.35	0.26	0.39	0.49
AT1G04490		At1g04490 [Source:UniProtKB/TrEMBL;Acc:Q67XK9]	0.1	0.23	0.04	0.32	0.31	0.4	1.48	1.3	1.61	1.97	1.76	1.86	6.76	7	6.13	7.64	7.35	6.42
AT1G04493		-	0	0	1.35	0	0	0.64	0.6	0.89	1.14	0	0	0.73	1.41	1.19	0	1.36	0.62	0
AT1G04497		-	0	0	0.59	0	0.61	0	0	0.87	0	0	0	0	0	0	0	0	0	0
AT1G04500		CCT motif family protein [Source:UniProtKB/TrEMBL;Acc:Q1PFY7]	0.09	0.17	0.16	0.04	0.15	0.23	0.22	0.27	0.11	0.14	0.24	0.23	0.14	0.06	0.03	0.2	0.32	0.24
AT1G04503		-	0	0	0	0	0	0	0	0	0	0	0	0	0	0	0	0	0	0
AT1G04507		-	1.81	0.71	0	0	0	2.65	0	0	0	1.06	4.04	3.59	0	0	0.21	0	1.69	0
AT1G04510	PRP19A	Pre-mRNA-processing factor 19 homolog 1 [Source:UniProtKB/Swiss-Prot;Acc:Q94BR4]	48.49	44.44	43.45	50.95	51.82	47.45	46.09	51.14	48.43	57.14	56.74	58.48	54.25	56.87	57.87	53.29	51.47	54.26
AT1G04513		-	0.91	1.1	0	0.71	0.75	0	0.29	0.82	1.36	0.66	0.54	0.37	0.41	0.43	0.26	0.24	0	0
AT1G04517		-	0	0	0	0	0	0	0	0	0	0	0	0	0	0	0	0	0	0
AT1G04520	CRRSP3	Cysteine-rich repeat secretory protein 3 [Source:UniProtKB/Swiss-Prot;Acc:Q6NM73]	6.06	5.61	6.18	22.94	22.46	21.57	45.57	42.72	41.12	19.03	19.27	20.79	20.82	22.65	18.25	17.91	17.04	17.37
AT1G04523		-	0	0	0	0	0	0	0	0	0	0	0	0	0	0	0	0	0	0
AT1G04527		-	0	0	0	0	0	0	0	0	0	0	0	0	0	0	0	0	0	0
AT1G04530	TPR4	Tetratricopeptide repeat (TPR)-like superfamily protein [Source:UniProtKB/TrEMBL;Acc:Q8VZ31]	13.51	16.42	16.69	26.11	21.84	23.64	31.32	34.4	32.66	22.16	24.74	22.5	24.85	21.95	23.83	22.72	21.11	20.92
AT1G04533		-	0	0	0.14	0	0	0.29	0	0	0	0	0	0	0	0.13	0	0	0.14	0.13
AT1G04537		-	0	0	0	0	0	0	0	0	0	0	0	0	0	0	0	0	0	0
AT1G04540		Calcium-dependent lipid-binding (CaLB domain) family protein [Source:UniProtKB/TrEMBL;Acc:F4I5P7]	1.4	1.22	1.52	0.89	0.93	0.66	1.72	1.79	2.34	2.23	2.11	2.03	2.01	2.2	2.41	1.82	1.93	1.6
AT1G04547		-	0	0	0	0	0	0	0	0	0	0	0	0	0	0	0	0	0	0
AT1G04550	IAA12	Auxin-responsive protein IAA12 [Source:UniProtKB/Swiss-Prot;Acc:Q38830]	14.51	20.42	20.66	23.01	20.04	22.12	33.8	33.79	34.87	18.68	17.32	19.48	17.98	16.83	18.13	14.75	14.21	13.45
AT1G04555		Transmembrane protein [Source:UniProtKB/TrEMBL;Acc:Q1G3F4]	24.59	22.93	21.59	25	27.22	27.22	15.84	14.71	15.14	32	30.4	28.59	25.43	27.84	26.54	29.52	26	27.78
AT1G04557		-	2.6	0	0	0	0	0	4.23	0	0	0	0	0	0	0	6.52	0	0	0
AT1G04560		AWPM-19-like family protein [Source:UniProtKB/TrEMBL;Acc:O23029]	0	0.3	0.35	0.08	0	0	0.14	0	0	0.87	0.33	0.37	5.52	6.44	5.89	16.13	17.79	17.74
AT1G04563		-	4.4	0	0	1.82	0	0	3.19	0	0	7.86	1.66	0	1.92	0	3.25	0	0	0
AT1G04567		-	0	0	0.32	0	0	0.31	0	0	0	0	0	0	0.67	0	0	0	0.61	0
AT1G04570		Probable folate-biopterin transporter 8, chloroplastic [Source:UniProtKB/Swiss-Prot;Acc:F4I5Q2]	22.65	20.53	19.79	21.28	20.58	20.73	46.1	46.93	43.49	13.28	13.02	12.53	18.57	19.42	18.02	12.59	12.98	12.76
AT1G04573		-	0	0	0	0	0	0	0	0	0	0	0	0	0	0	0	0	0	0
AT1G04577		-	3.66	5.2	4.76	6.84	0	4.03	1.99	3.34	7.67	2.48	0	0	4.85	0	0	6.85	2.04	6.38
AT1G04580	AAO4	Benzaldehyde dehydrogenase (NAD(+)) [Source:UniProtKB/Swiss-Prot;Acc:Q7G191]	10.1	15.46	15.71	24	24.48	24.07	85.56	93.63	86.01	122.68	123.02	132.56	145.8	153.09	150.25	139.15	142.85	143.34
AT1G04583		-	0	0	0	0	0	0	0	0	0	0	0	0	0	0	0	0	0	0
AT1G04587		-	0.75	0	1.83	0.92	0	4.21	0	1.22	3.05	5.81	2.47	7.88	3.79	2.41	1.68	5.45	2.48	2.52
AT1G04590		BEST Arabidopsis thaliana protein match is: Pentatricopeptide repeat (PPR) superfamily protein (TAIR:AT4G21190.1); Ha. [Source:TAIR;Acc:AT1G04590]	33.21	35.02	34.66	38.69	39.45	38.24	29.18	28.66	29.03	29.12	31.1	30.84	28.21	25.26	28.14	25.84	26.38	29.03
AT1G04593		-	0	0	0	0	0	0	0	0	0	0	0	0.23	0	0	0	0	0	0
AT1G04597		-	0	0	0	0	0	0	0	0	0	0	0	0	0	0	0	0	0	0
AT1G04600	XI-A	Myosin-7 [Source:UniProtKB/Swiss-Prot;Acc:F4I5Q6]	0.76	1.61	1.75	1.6	1.95	1.73	1.5	1.61	1.64	1.49	1.79	1.68	2.11	2.45	2.07	2.5	1.7	2.26
AT1G04603		-	0	0	0	0	0	0	0	0	0	0	0	0	0	0	0	0	0	0
AT1G04607		-	0	0	0	0	0	0	0	0	0	0	0	0	0	0	0	0	0	0
AT1G04610	YUC3	Probable indole-3-pyruvate monooxygenase YUCCA3 [Source:UniProtKB/Swiss-Prot;Acc:O23024]	1.75	2.2	1.91	1.91	2.39	2.22	2.53	2.64	2.81	0.25	0.34	0.2	0.31	0.2	0.2	0.12	0.06	0.03
AT1G04620	HCAR	7-hydroxymethyl chlorophyll a reductase, chloroplastic [Source:UniProtKB/Swiss-Prot;Acc:Q8GS60]	13.07	13.04	13.23	16.71	17.3	18.04	19.7	20.72	20.05	12.57	11.93	11.37	13.56	12.54	12.49	13.69	14.04	14.24
AT1G04623		-	0	0	0	0	0	0	0	0	0	0	0	0	0	0	0	0	0	0
AT1G04625		Polynucleotidyl transferase, ribonuclease H-like superfamily protein [Source:UniProtKB/TrEMBL;Acc:F4I5Q9]	0.08	0	0.08	0	0	0	0	0	0	0	0.08	0	0.18	0	0	0	0	0.08
AT1G04630	MEE4	NADH dehydrogenase [ubiquinone] 1 alpha subcomplex subunit 13-A [Source:UniProtKB/Swiss-Prot;Acc:Q8RWA7]	97.4	85.81	82.1	94.71	84.07	89.01	88.85	85.56	85.11	87.41	97.23	91.21	86.51	79.61	83.79	82.56	81.29	89.94
AT1G04635	EMB1687	Probable ribonuclease P/MRP protein subunit POP5 [Source:UniProtKB/Swiss-Prot;Acc:Q6AWV1]	8.55	7.87	6.03	11.05	8.82	9.26	6.66	5.79	5.8	9.64	8.4	8.02	6.67	5.37	6.58	6.13	5.02	5.91
AT1G04640	LIP2	LIP2 [Source:UniProtKB/TrEMBL;Acc:A0A178WI01]	7.25	6.64	6.2	6.93	6.17	6.68	5.69	5.87	5.98	7.12	7.39	5.72	5.5	4.33	4.04	2.36	4.39	3.78
AT1G04643		-	0.06	0.14	0.27	0	0	0.08	0.13	0	0	0.15	0	0	0.3	0	0	0.05	0	0
AT1G04645	SPH5	S-protein homolog 5 [Source:UniProtKB/Swiss-Prot;Acc:O23020]	194.16	171.96	161.13	430.15	412.12	428.78	392.03	394.32	379.04	471.31	495.23	451.75	334.38	319.63	293.75	268.04	267.61	265.96
AT1G04647		-	8.46	6.96	9.64	6.11	3.68	7.67	3.27	2.84	6.39	8.73	6.93	9.95	4.19	6.49	6.83	8.21	7.8	8.83
AT1G04650		unknown protein; Ha. [Source:TAIR;Acc:AT1G04650]	2.68	3.74	4.36	5.07	5.27	5.25	4.99	4.53	5.08	4.57	6.01	5.57	6.38	6.76	5.91	6.22	6.48	5.84
AT1G04653		-	0	0	0	0	0	0	0	0	0	0	0	0	0	0	0	0	0	0
AT1G04657		-	0	0	0	0	0	0	0	0	0	0	0	0	0	0	0	0	0	0
AT1G04660		Glycine-rich protein [Source:UniProtKB/TrEMBL;Acc:O23018]	11.08	13.4	13.01	133.26	126.21	137.38	909.99	876.57	983.15	29.86	31.69	28.59	62.16	57.26	66	30.32	35.49	33.22
AT1G04667		-	0	0	0	0	0	0	0	0	0	0	0	0	0	0	0	0	0	0
AT1G04670		Putative uncharacterized protein [Source:UniProtKB/TrEMBL;Acc:Q5Q0I9]	0	0	0	0	0	0	0	0	0	0	0	0	0.09	0	0	0	0	0
AT1G04673		-	0	0	0	0	0	0	0	0	0	0	0	0	0	0	0	0	0	0
AT1G04677		-	0	0	0	0	0	0	0	0	0	0	0	0	0	0	0	0	0	0
AT1G04680		Pectate lyase [Source:UniProtKB/TrEMBL;Acc:A0A178W464]	2.06	1.89	1.75	3.31	4.07	4.83	10.16	10.15	10.92	1.11	1.32	0.77	2.09	1.16	1.23	0.83	1.13	1.28
AT1G04683		-	0	0	0	0	0	0	0	0	0	0	0	0	0	0	0	0	0	0
AT1G04687		-	0	0	0	0	0	0	0	0	0	0	0	0	0	0	0	0	0	0
AT1G04690	KAB1	Probable voltage-gated potassium channel subunit beta [Source:UniProtKB/Swiss-Prot;Acc:O23016]	123.24	120.46	121.99	91.71	92.1	92.21	97.96	103.42	101.01	74.79	80.28	74.24	75.19	73.53	72.21	82.25	80.64	86.34
AT1G04693		-	0	0	0	0	0	0	0	0	0	0	0	0	0	0	0	0	0	0
AT1G04697		-	0	0.12	0	0	0	0.45	0	0.25	0.2	0	0	0	0	0	0	0	0	0.1
AT1G04700		PB1 domain-containing protein tyrosine kinase [Source:UniProtKB/TrEMBL;Acc:F4I5S1]	1.16	2.29	2.15	1.64	1.34	1.38	1.57	2.21	1.87	1.11	1.24	1.58	1.94	1.73	1.93	1.99	1.68	2.06
AT1G04703		-	0	0	0	0	0	0	0	0	0	0	0.28	0	0	0	0	0	0	0
AT1G04707		-	4.54	8.65	5.86	5.8	4.61	2.84	0	3.71	0.99	1.36	0.01	1.06	0.64	0.68	0	0.78	0	0
AT1G04710	KAT1	PKT4 [Source:UniProtKB/TrEMBL;Acc:A0A178W7T5]	38.59	39.76	41.52	30.37	37.91	36.76	31.28	33.95	33.75	30.63	30.46	32.63	32.46	31.18	31.92	35.22	34.61	32.24
AT1G04713		-	0	0	0	0	0	0	0	0	0	0	0	0	0	0	0	0	0	0
AT1G04717		-	0	0	0	0	0	0	0	0	0	0	0	0	0	0	0	0	0	0
AT1G04720		pre-tRNA [Source:TAIR;Acc:AT1G04720]	0	0	0	0	0	0	0	0	0	0	0	0	0	0	0	0	0	0
AT1G04723		-	0	0.62	0.86	0.63	0.82	1.17	0.27	1	0.63	0.64	0.13	0.76	1.56	0.52	0.73	0.75	2	0.41
AT1G04730	CTF18	p-loop containing nucleoside triphosphate hydrolases superfamily protein [Source:UniProtKB/TrEMBL;Acc:F4I5S3]	5.96	7.73	7.79	7.08	7.36	7.76	7.04	7.32	7.36	8.55	7.99	8.1	9.78	10	8.97	6.72	9.28	8.76
AT1G04733		-	4.41	0	0	19.45	2.72	29.03	24.36	0	28.39	0	24.9	0	8.85	9.62	8.21	44.47	22.36	25.92
AT1G04737		-	0	0	0	0	0.34	0	0	0	0	0	0.17	0.38	0	0	0	0	0	0
AT1G04743		-	0.64	0.07	0	0	0.06	0	0	0	0.02	0	0	0	0	0.11	0.06	0	0	0
AT1G04747		-	0	0	12.91	0	0	0	0	0	0	0	0	0	0	0	0	0	0	0
AT1G04750	VAMP721	Putative vesicle-associated membrane protein, synaptobrevin 7B [Source:UniProtKB/TrEMBL;Acc:Q681L9]	130.12	117.23	116.83	139.77	128.8	123.73	126.38	116.85	116.33	129.86	138.55	124.03	140.23	133.9	130.09	137.32	137.02	131.12
AT1G04753		-	0	0	0	0	0	0	0	0	0	0	0	0	0	0	0	0	0	0
AT1G04760	VAMP726	Putative vesicle-associated membrane protein 726 [Source:UniProtKB/Swiss-Prot;Acc:Q9MAS5]	3.61	3.27	2.66	10.34	8.07	9.31	14.77	13.95	15.08	10.49	9.96	10.26	13.18	12.65	13.59	13.13	13.15	13.07
AT1G04763		-	0	0	0	0	0	0	0	0	0	0	0	0	0	0	0	0	0	0
AT1G04767		-	0	0	0	0	0.16	0	0	0.42	0	0.23	0.08	0	0	0.36	0.18	0.57	0	0
AT1G04770		Protein SULFUR DEFICIENCY-INDUCED 2 [Source:UniProtKB/Swiss-Prot;Acc:Q8L730]	41.44	43.47	45.24	42.19	43.78	38.54	21.37	24.45	23.23	27.58	27.02	25.62	15.52	14.38	13.37	11.89	13.05	13.56
AT1G04773		-	0	0	0	0	0	0	0	0	0	0	0	0	0	0	0	0	0	0
AT1G04778		unknown protein; FUNCTIONS IN: molecular_function unknown; INVOLVED IN: biological_process unknown; LOCATED IN: cellular_component unknown; Ha. [Source:TAIR;Acc:AT1G04778]	1.02	1.15	0.92	0.64	0.75	0.59	0.35	0.4	0.7	0.72	0.67	0.45	0.39	0.33	0.22	0.38	1.16	0.74
AT1G04780		Ankyrin repeat family protein [Source:UniProtKB/TrEMBL;Acc:Q8GXW8]	14.39	25.66	26.68	21.18	22.13	24.76	22.36	25.54	24.93	22.98	24.81	24.85	21.59	24.13	22.28	20.6	19.65	17.98
AT1G04783		-	0	0	0	0	0	0	0	0	0	0	0	0	0	0	0.13	0	0	0.12
AT1G04787		-	0.75	0.3	0	0	0	0	0	0	0	0	0.26	0.3	0.3	1.25	0	0	0.54	0
AT1G04790		At1g04790 [Source:UniProtKB/TrEMBL;Acc:Q93XZ6]	10.15	14.07	13.75	11.97	12.58	12.83	14.5	15.2	14.53	19.88	19.49	20.35	18.37	20.09	20.18	18.96	18.27	18.62
AT1G04793		-	0	0	0	0	0	0	0	0	0	0	0	0	0	0	0	0	0	0
AT1G04797		-	0.19	0.22	0.41	0.45	0.2	0	0.59	0.49	0.72	1.14	0.19	0.88	1.34	0	0.42	0	0.61	0.39
AT1G04800		At1g04800 [Source:UniProtKB/TrEMBL;Acc:Q9MAS9]	0.99	0.43	0.7	1.25	0.36	1.06	0.55	0.36	0.79	0.18	0.28	0.63	0.12	0.3	0.19	0.29	0.22	0.31
AT1G04803		-	0	0.32	0.35	0	0	0.33	0.4	0	0.36	0	0.29	0	0	0.01	0	0	1.46	0.64
AT1G04807		-	0	0	0	0	0	0	0	0	0	0	0	0	0	0	0	0	0	0
AT1G04810	RPN2B	26S proteasome non-ATPase regulatory subunit 1 homolog [Source:UniProtKB/TrEMBL;Acc:A0A178WEG0]	36.19	40.42	40.8	35.24	33.2	34.76	29.67	33.95	32.19	49.27	46.03	48.92	50.47	52.84	53.82	47.71	46.93	48.61
AT1G04813		-	0	0	0	0	0	0	0	0	0	0	0	0	0	0	0	0	0	0
AT1G04817		-	0	0	0	0	0	0	0.45	0	0	0	0	0	0	0	0	0	0	0
AT1G04820	TUBA4	Tubulin alpha-2 chain [Source:UniProtKB/Swiss-Prot;Acc:B9DGT7]	505.89	454.48	447.2	565.71	534.37	538.61	720.03	759.49	737.06	596.2	579.84	619.14	752.98	746.37	768.44	683.96	712.62	730.28
AT1G04823		-	0	0	0	0	0	0	0	0	0	0	0	0	0	0	0	0	0	0
AT1G04827		-	0.81	0.75	1.08	1.92	0.89	1.45	0.68	1.39	0.49	1.92	0.88	0.41	1.11	0.71	0.65	0.99	1.26	0.66
AT1G04830		Ypt/Rab-GAP domain of gyp1p superfamily protein [Source:UniProtKB/TrEMBL;Acc:F4I5T4]	19.51	16.88	15.62	17.05	19.45	20.53	22.21	24.37	20.87	24.68	28.27	28.33	29.57	32.34	33.44	33.37	34.62	35.47
AT1G04833		-	4.16	2.35	4.96	2.78	4.58	4.03	2.17	1.13	2.41	0.46	2.51	2.34	1.55	2.23	1.85	2.75	2.89	2.59
AT1G04837		-	16.98	14.36	22.13	11.36	18.89	21.97	18.93	21.74	26.52	24.41	16.43	15.46	9.05	19.34	20.76	17.16	17.89	20.05
AT1G04840	PCMP-H64	Pentatricopeptide repeat-containing protein At1g04840 [Source:UniProtKB/Swiss-Prot;Acc:Q9MAT2]	0.72	1.18	1.45	1.1	1.48	1.05	1.03	1.13	1.3	1.69	2.04	1.41	1.59	1.51	1.74	1.18	1.13	1.01
AT1G04847		-	0	0	0	0	0	0	0	0	0	0	0	0	0	0	0	0	0	0
AT1G04850		F13M7.16 protein [Source:UniProtKB/TrEMBL;Acc:Q9MAT3]	131.85	129.23	123.05	136.82	122.9	117.76	108.87	113.71	112.25	138.73	139.57	146.02	138.41	137.36	139.97	132.08	135.23	127.26
AT1G04853		-	1.11	0.46	0	0	1.22	0.83	1.18	1.63	0	0.92	0	0	0	0.38	0	0	0	0
AT1G04857		-	0	0	0	0	0	0	0	0	0	0	0	0	0	0	0	0	0	0
AT1G04860	UBP2	Ubiquitinyl hydrolase 1 [Source:UniProtKB/TrEMBL;Acc:A0A178WGQ0]	7.84	13.07	14.18	11.45	12.15	12.75	13.2	14.62	14.29	21.08	20.57	20.34	18.31	20.92	19.95	17.45	16.87	16.7
AT1G04863		-	0	0	0	0	0	0	0	0	0	0	0	0	0	0	0	0	0	0
AT1G04867		-	0	0	0	0	0	0	0	0	0	0	0	0	0	0	0	0	0	0
AT1G04870	PRMT10	PRMT10 [Source:UniProtKB/TrEMBL;Acc:A0A178WKU5]	28.35	33.6	32.56	43.24	44.78	45.83	30.65	29.93	31.15	47.85	49.27	49.7	40.85	39.07	38.64	32.99	31.69	34.52
AT1G04873		-	0	38.87	33.73	21.09	14.82	35.44	30.32	20.15	32.89	30.45	58.59	49.15	38.21	36.89	31.8	44.53	39.84	18.31
AT1G04877		-	0	0	0	0	0	0	0	0	0	0	0	0	0	0	0	0	0	0
AT1G04880	HMGB15	High mobility group B protein 15 [Source:UniProtKB/Swiss-Prot;Acc:Q9MAT6]	7.67	7.67	7.52	7.63	6.44	6.36	1.98	1.07	1.34	5.67	5.85	5.85	3.49	3.75	3.67	2.41	2.43	2.14
AT1G04883		-	0	0	0	0	0	0	0	0	0	2.28	0.97	0	0	0	0	0	1.93	0
AT1G04887		-	0	0	0	0.05	0.04	0	0	0	0	0	0	0	0.11	0.07	0	0	0.04	0
AT1G04890		Protein of unknown function, DUF593 [Source:TAIR;Acc:AT1G04890]	0	0	0	0	0	0	0	0	0	0	0	0.02	0	0.02	0.05	0	0	0
AT1G04893		-	0	1.03	0.48	0	0	0.92	0	2.45	1.22	0	1.74	0	0	1.27	0	0.49	0	0
AT1G04895		-	0	0	0	0	0	0	0	0	0	0	0	0	0	0	0	0	0	0
AT1G04897		-	0	0	0	0	0	0	0	0	0	0	0	0	0	0	0	0	0	0
AT1G04900		Protein arginine methyltransferase NDUFAF7 [Source:UniProtKB/TrEMBL;Acc:A0A178WEZ0]	12.82	14.73	15	14.47	12.97	13.66	11.65	11.7	12.78	15.2	14.77	14.59	11.91	9.7	10.08	10.64	10.77	10.13
AT1G04907		-	0	0	0	0	0	0	0	0	21.77	0	0	0	0	25.89	0	0	0	0
AT1G04910	OFUT1	O-fucosyltransferase 1 [Source:UniProtKB/Swiss-Prot;Acc:Q8W486]	24.67	24.92	25.72	20.43	21.78	21.61	22.14	21.92	22.71	22.71	25.11	23.95	24.62	23.66	22.21	21.4	19.9	21.28
AT1G04913		-	0.22	0.53	0	0	0.71	0.49	0.23	0	0	1.09	0.23	0.53	1.33	0.67	0.5	1.03	0.48	0.93
AT1G04917		-	0.5	2.2	0.34	1.81	3.14	2.05	0.26	0.21	1.15	2.51	1.96	0.46	0.91	1.45	2.71	0	1.82	2.08
AT1G04920	SPS3	Probable sucrose-phosphate synthase 3 [Source:UniProtKB/Swiss-Prot;Acc:Q8RY24]	0.61	1.03	1.13	2.32	3.06	3.02	5.97	6.52	5.25	5.21	5.01	4.78	8.83	9.38	9.33	10.88	11.07	10.93
AT1G04923		-	0	0	0	0	0	0	0	0	0	0	0	0	0	0	0	0	0	0
AT1G04927		-	0	0	0	0	0	0.29	0	0	0	0.63	0.8	0	0	0	0.29	0	0	0
AT1G04930		Hydroxyproline-rich glycoprotein family protein [Source:UniProtKB/TrEMBL;Acc:F4I764]	4.69	4.2	4.11	6.32	5.19	4.95	4.59	5.88	5.57	4.84	4.77	5.95	5.89	5.5	5.17	4.56	5.29	4.92
AT1G04933		-	0	0	0	0.03	0	0.5	0.33	0.13	1.26	0	0.29	0.87	0	0.22	0.68	0.55	0	0.43
AT1G04937		-	0	0	0	0	0	0	0	0	0	0	0	0	0	0	0	0	0	0
AT1G04940	TIC20-I	Protein TIC 20-I, chloroplastic [Source:UniProtKB/Swiss-Prot;Acc:Q8GZ79]	45.98	37.49	35.34	43.65	45.58	42.82	46.46	47.83	48.66	39.49	40.57	39.58	40.21	35.48	35.3	36.36	36.62	39.41
AT1G04943		-	0	0	0	0	0	0	0	0	0	0	0	0	0	0	0	0	0	0
AT1G04945		HIT-type Zinc finger family protein [Source:UniProtKB/TrEMBL;Acc:F4I765]	7.91	10.49	9.79	11.33	10.52	10.42	9.36	9.46	9.57	15.89	17.28	17.72	14.5	14.42	13.97	12.26	11.75	11.81
AT1G04947		-	0	0	0	0	0	0	0	0	0	0	0	0	0	0	0	0	0	0
AT1G04950	TAF6	TAFII59 [Source:UniProtKB/TrEMBL;Acc:A0A178W741]	20.19	20.6	20.36	18.71	20.63	19.19	21.53	22.6	20.68	25.53	25.95	26.33	26.77	28.99	28.64	29.19	30.57	29.79
AT1G04953		-	0.06	0.19	0	0.1	0	0	0	0	0.02	0	0.23	0.14	0	0.05	0	0.22	0	0
AT1G04957		-	0	0	0	0	0	0	0	0	0	0	0	0	0	0	0	0	0	0
AT1G04960		Protein of unknown function (DUF1664) [Source:TAIR;Acc:AT1G04960]	23.57	23.98	25.06	23.97	25.47	23.47	19.76	18.72	18.81	29.56	29.24	31.47	30.9	29.14	30.86	36.44	33.81	35.27
AT1G04963		-	0	0	0	0	0	0	0	0	0	0	0	0	0	0	0	0	0	0
AT1G04967		-	0	0	0	0	0	0	0	0	0	0	0	0	0	0	0	0	0	0
AT1G04970		Putative BPI/LBP family protein At1g04970 [Source:UniProtKB/Swiss-Prot;Acc:Q9MAU5]	15.71	19.05	19.02	16.15	17.02	16.94	20.24	19.22	18.94	31.65	30.49	31.95	39.36	42.25	39.57	53.72	52.99	53.89
AT1G04973		-	2.56	2.13	1.44	2.53	0.95	1.49	2.19	2.74	2.41	2.63	3.73	1.72	2.78	3.71	1.97	5.63	4.74	3.93
AT1G04977		-	18.87	12.13	9.88	18.82	14.97	18.49	11.61	12.9	17.87	14.25	14.05	15.24	14.87	16.34	19.35	17.49	12.72	11.28
AT1G04980	PDIL2-2	Protein disulfide-isomerase like 2-2 [Source:UniProtKB/Swiss-Prot;Acc:Q9MAU6]	47.01	48.21	46.26	36.25	29.9	32.33	24.58	23.5	21.82	40.08	38.17	37.85	34.06	35.39	36.13	37.56	34.11	36.61
AT1G04983		-	0	0	0	0	0	0	0	3.34	0	0	0	0	0	0	0	0	0	0
AT1G04985		Triacylglycerol lipase-like protein [Source:UniProtKB/TrEMBL;Acc:Q84JL8]	25.68	21.43	22.81	28.63	26.78	25.56	20.72	18.13	21.11	27.34	27.89	27.73	26.66	25.89	25.98	30.62	30.08	27.63
AT1G04987		-	0	0	0	0	0	0	0	0	0	0	0	0	0	0	0	0	0	0
AT1G04990		Zinc finger CCCH domain-containing protein 3 [Source:UniProtKB/Swiss-Prot;Acc:Q94AD9]	67.55	59.85	60.6	55.22	56.19	52.68	59.72	56.1	58.74	52.71	50.86	51.9	84.81	81.29	84.39	100.91	98.16	100.86
AT1G04993		-	0	0	0	0	0	0	0	0	0	0	0	0	0	0	0	0	0	0
AT1G04997		-	0.53	0	0.3	0	0.28	0	0	0	0	0.32	0.27	0	0	0	0	0	0	0
AT1G05000		Phosphotyrosine protein phosphatases superfamily protein [Source:UniProtKB/TrEMBL;Acc:F4I780]	4.36	4.86	4.11	5.09	6.35	7.19	12.7	13.7	11.29	11.31	11.73	10.13	15.15	15.97	13.5	13.98	16.73	16.65
AT1G05003		-	0	0	0	0	0	0	0	0	0	0	0	0	0	0	0	0	0	0
AT1G05005		PPR containing protein [Source:UniProtKB/TrEMBL;Acc:A0A1P8AMD1]	0	0	0	0	0.17	0	0	0.51	0	0.18	0	0	0.29	0.18	0.41	0.53	0	0
AT1G05007		-	0	0	0	0	0	0	0	0	0	0	0	0	0	0	0	0	0	0
AT1G05010	ACO4	1-aminocyclopropane-1-carboxylate oxidase 4 [Source:UniProtKB/Swiss-Prot;Acc:Q06588]	0.79	0.6	0.65	2.79	2.23	1.99	2.6	2.27	2.32	1.74	2.07	2.07	7.06	7.04	6.25	9.26	9.52	8.45
AT1G05013		-	0	0	0	0	0	0	0	0	0	0	0	0	0	0	0	0	0	0
AT1G05017		-	0	0	0	0	0	0	0	0	0	0	0	0	0	0	0	0	0	0
AT1G05020	AP180	Clathrin coat assembly protein AP180 [Source:UniProtKB/Swiss-Prot;Acc:Q9ZVN6]	0.07	0.34	0.33	0.14	0.12	0.15	0.14	0.15	0.16	0.26	0.52	0.37	0.24	0.49	0.43	0.26	0.22	0.13
AT1G05023		-	0	0	0	0	0	0	0	0	0	0	0	0	0	0	0	2.13	0	0.99
AT1G05027		-	0	0	0	0	0	0.11	0	0	0	0	0	0	0	0	0	0	0	0
AT1G05030		Probable plastidic glucose transporter 1 [Source:UniProtKB/Swiss-Prot;Acc:Q0WVE9]	5.99	7.69	7.43	6.99	6.87	6.58	6.35	6.91	6.95	7.1	7.53	8.38	8.78	7.77	6.67	9.03	7.68	7.89
AT1G05033		-	0.33	1.03	1.39	2.88	0.41	1.61	6.87	3.83	5.33	2.19	3.29	3.21	5.23	4.76	6.12	7.5	9.92	6.75
AT1G05035		-	0	0	0	0	0	0	0	0	0	0	0	0	0	0	0	0	0	0
AT1G05037		-	0	0	0	0	0	0	0	0	0	0	0	0	0	0	0	0	0	0
AT1G05040		T7A14.9 [Source:UniProtKB/TrEMBL;Acc:Q9ZVN8]	0	0	0	0.08	0	0.06	0.14	0.08	0.1	0.06	0.14	0.12	0.24	0.1	0.23	0.23	0.13	0.28
AT1G05043		-	3.07	2.22	2.33	0.76	2.49	1.27	2.24	1.91	1.22	2.75	2.69	1.46	2.4	1.75	3.25	3.03	3.16	1.69
AT1G05047		-	0.38	0.64	0.37	0	0	0.5	0	0	1.01	0	0.51	0.36	0	0	0	0	0	0
AT1G05053		-	0	0	0	0	0	0	0	0	0	0	0	0	0	0	0	0	0	0
AT1G05055	GTF2H2	General transcription factor IIH subunit [Source:UniProtKB/TrEMBL;Acc:A0A178W5Z7]	16.67	16.92	18.77	15.42	17.02	17.24	17.66	17.13	16.5	22.07	24.88	24.49	23.32	21.54	22.82	19.42	19.7	21.93
AT1G05057		-	0	0	0	0	0	0	0	0	0	0	0	0	0	0	0	0	6.29	0
AT1G05060		At1g05060 [Source:UniProtKB/TrEMBL;Acc:Q9ZVP0]	25.41	24.4	28.87	29.42	27.74	23.95	23.43	23.73	23.72	25.52	23.93	25.72	20.39	21.34	19.99	19.74	23.17	21.15
AT1G05065	CLE20	CLAVATA3/ESR (CLE)-related protein 20 [Source:UniProtKB/Swiss-Prot;Acc:Q3EDI6]	0	0	0	0	0.26	0	0.36	0.93	0.16	0	0	0	0	0.08	0	0.1	0	0
AT1G05067		-	0	0	0	0	0	0	0	0	0	0	0	0	0	0	0	0	0	0
AT1G05070		At1g05070/T7A14_6 [Source:UniProtKB/TrEMBL;Acc:Q94AB8]	51.21	37.14	37.16	44.69	45.07	43.27	33.03	31.29	30.45	26.28	29.06	27.74	25.78	22.33	25.03	25.09	27.04	25.42
AT1G05073		-	0	0	0	0	0	0	0	0	0	0	0	0	0	0	0	0	0	0
AT1G05077		-	0	0	0	0	0	0	0	0	0	0	0	0	0	0.95	0	0	0	0
AT1G05080		Putative FBD-associated F-box protein At1g05080 [Source:UniProtKB/Swiss-Prot;Acc:Q9ZVP2]	0.72	0.87	0.5	0.64	0.9	1.21	1.1	0.85	0.95	5.58	4.39	5.7	3.47	3.78	2.93	3	2.36	2.55
AT1G05083		-	0.91	4.85	4.57	3.77	5.14	3.77	5.92	7.04	7.24	8.51	8.03	8.94	6.66	6.75	6.45	5.49	5.04	5.73
AT1G05085		unknown protein; Ha. [Source:TAIR;Acc:AT1G05085]	0	0	0	0	0	0	0	0	0	0	0	0	0	0	0	0	0	0
AT1G05087		Dentin sialophosphoprotein [Source:UniProtKB/TrEMBL;Acc:A0A1P8AV76]	0.35	4.22	4.81	0.61	2.5	3.06	2.73	3.2	3.12	1.25	4.18	5.34	3.37	5.58	4.26	3.49	4.92	2.52
AT1G05090		dentin sialophosphoprotein-related [Source:TAIR;Acc:AT1G05090]	10.92	10.56	10.78	7.22	11.85	9.55	10.33	9.99	9.68	11.29	10.34	9.93	11.29	9.79	11.13	12.09	9.84	11.4
AT1G05093		-	0	0	0	0	0	0	0	0	0	0	0	0	0	0	0	0	0	0
AT1G05097		-	0	0	0	0	0	0	0	0	0	0	0	0	0	0	0	0	0	0
AT1G05100	MAPKKK18	Mitogen-activated protein kinase kinase kinase 18 [Source:UniProtKB/Swiss-Prot;Acc:Q9ZVP5]	1.15	1.2	1.22	2.45	1.95	2.14	0.45	0.96	1.14	0.52	0.98	0.57	1.37	1.2	1.3	1.85	1.57	1.75
AT1G05103		-	1.18	0	0	0	0	0	0.63	0	0	0	0	0	0	0	0	1.41	0.64	0
AT1G05107		-	0	0	0	0	0	0.59	0	0	0.53	0	0	0	0	0.55	0	0	0	0
AT1G05113		-	0	0	0	0	0	0	0	0	0	0	0	0	0	0	0	0	0	0
AT1G05117		-	0	0	0	0	0	0	0	0	0	0	0	0	0	0	0	0	0	0
AT1G05120		Helicase protein with RING/U-box domain [Source:TAIR;Acc:AT1G05120]	15.62	24.37	23.94	21.36	23.71	22.44	25.45	27.71	26.77	29.32	29.58	30.84	27.45	27.69	28.46	25.99	25.14	24.18
AT1G05123		-	0	0	0	0	0	0	0	0	0	0	1.65	0	0	0	0	0	0	0
AT1G05127		-	0	0	0	0	0	0	0	0	0	0	0	0	0	0	0	0	0	0
AT1G05133		-	0	0	0	0	0	0	0	0	0	0	0	0	0	0	0	0	0	0
AT1G05136		unknown protein; Ha. [Source:TAIR;Acc:AT1G05136]	0	0	0	0	0	0	0	0	0	0	0	0	0	0	0	0	0	0
AT1G05137		-	0	0	0	0	0	0	0	0	0	0	0	0	0	0	0	0	0	0
AT1G05140	ARASP2	Probable membrane metalloprotease ARASP2, chloroplastic [Source:UniProtKB/Swiss-Prot;Acc:O23053]	12.69	12.72	11.03	12.1	11.58	12.54	15.57	13.98	14.71	11.17	11.01	8.81	7.74	8.4	8.88	8.84	8.45	7.95
AT1G05143		-	3.32	0	0	0	0	0	1.08	1.53	0	0	1.23	0	0	0	1.05	0	0.38	0
AT1G05147		-	0	0.29	0	0	0.55	1.3	0	0.99	1.55	0	2.36	2.23	0	0.63	0	0	1.07	0
AT1G05150		Uncharacterized TPR repeat-containing protein At1g05150 [Source:UniProtKB/Swiss-Prot;Acc:O23052]	12.7	21.4	21.78	14.09	17.72	16.51	23.44	24.36	23.65	24.58	25.71	25.04	20.83	20.14	20.2	18.67	18.18	17.83
AT1G05153		-	0	0	0	0	0	0	0	0	0	0	0	0	0	0	0	0	0	0
AT1G05160	KAO1	Ent-kaurenoic acid oxidase 1 [Source:UniProtKB/Swiss-Prot;Acc:O23051]	18.7	24.11	24.31	42.83	45.45	45.19	95.61	102.17	98.04	24.45	25.74	23.23	41.58	40.09	38.86	48.91	49.65	49.49
AT1G05163		-	1.27	1.12	1.75	1.17	0.83	0.56	1.25	0.11	0.37	0.23	0.77	0.88	0.59	0.28	0.53	0.22	0.64	0.1
AT1G05170	B3GALT2	Hexosyltransferase (Fragment) [Source:UniProtKB/TrEMBL;Acc:W8Q3U9]	4.67	3.5	4.09	4.55	4.02	4.56	17.47	17.91	16.25	19.26	21.99	20	13.54	14.03	12.8	10.04	10.4	11.04
AT1G05173		-	0	0	0	0	0	0	0	0	0	0	0	0	0	0	0	0	0	0
AT1G05177		-	0	0	0	0.24	0	0	0	0	0	0	0	0	0	0	0	0	0	0
AT1G05180	AXR1	NEDD8-activating enzyme E1 regulatory subunit [Source:UniProtKB/TrEMBL;Acc:A0A178WFT2]	23.52	26.49	25.93	28.06	25.8	23.25	20.21	21.73	20.37	43.41	44.47	41.8	34.37	33.23	32.72	32.19	29.19	28.68
AT1G05183		-	9.88	2.83	4.91	11.81	6.3	12.22	12.45	7.92	0	9.43	5.51	3.4	3.66	5.42	6.04	0.01	3.13	5.28
AT1G05187		-	0	0.35	0.82	0	0	0	0	0	0	0	0.6	0	0	0	0.09	0	0	0
AT1G05190	RPL6	50S ribosomal protein L6, chloroplastic [Source:UniProtKB/Swiss-Prot;Acc:O23049]	90.11	86.36	82.71	124.22	114.74	108.35	131.49	128.89	135.9	63.71	66.41	62.49	68.04	69.13	64.07	58.92	58.34	59.81
AT1G05193		-	0	0	0	0	0	0	0	0	0	0	0	0	0	0	0	0	0	0
AT1G05197		-	0	0	0	0	0	0	0	0	0	0	0	0	0	0	0	0	0	0
AT1G05200	GLR3.4	Glutamate receptor [Source:UniProtKB/TrEMBL;Acc:Q53YX3]	8.95	15.1	14.77	9.76	11.37	10.23	6.75	8.27	8.31	6.63	6.22	7.42	4.54	4.74	4.42	3.79	3.89	4.71
AT1G05203		-	0.43	0.25	0	1.54	0.68	1.18	0.67	0.86	0.83	0.52	1.53	1.76	2.8	2.13	1.66	1.72	1.15	0.67
AT1G05205		At1g05205 [Source:UniProtKB/TrEMBL;Acc:Q8LG56]	82.04	62.43	53.82	83.49	65.52	64.31	45.79	38.73	56.13	52.4	54.55	47.9	55.2	49.51	51.15	53.58	53.13	54.48
AT1G05207		-	0.74	0.93	1.28	1.8	2.04	2.08	1.96	2.72	4.03	2.31	0.39	0.92	0.9	1.14	0	0	0.81	0.4
AT1G05210		At1g05210 [Source:UniProtKB/TrEMBL;Acc:O23047]	29.83	24.05	25.15	23.12	22.28	20.23	14.87	13.9	17.92	15.9	18.48	17.03	14.53	14.22	12.44	11.95	12.66	12.32
AT1G05213		-	0	0	0	0	0	0	0	0	0	0	0	0	0	0	0	0	0	0
AT1G05217		-	8.15	1.66	4.54	3.16	4.71	4.75	3.05	3.69	4.02	5.61	9.5	3.27	10.08	6.72	11.97	9.1	9.97	7.08
AT1G05220		Transmembrane protein 97, Putative [Source:UniProtKB/TrEMBL;Acc:O23046]	0.38	0.64	0.2	4.22	4.69	2.28	5.13	3.29	3.78	12.3	11.55	8.66	12.59	11.57	12.79	12.28	12.01	14.41
AT1G05223		-	0	0	0	0	0	0	0	0	0	0	0	0	0	0	0	0	0	0
AT1G05227		-	0	0.99	0	0	0	0	0	0	0	0.97	0	0	0	0	0	0	0	0
AT1G05230	HDG2	AT1G05230 protein [Source:UniProtKB/TrEMBL;Acc:B9DFH8]	31.57	37.94	38.95	28.17	30.4	29.49	49.29	56.41	55.27	70.74	70.57	72.87	63.05	59.7	58.61	49.05	51.13	50.92
AT1G05233		-	0	0	0	0	0	0	0	0	0	0	0	0	0	0	0	0	0	0
AT1G05237		-	0	0	0	0	0	0	0	0	0	0	0	0	0	0	0	0	0	0
AT1G05240	PER2	Peroxidase 1 [Source:UniProtKB/Swiss-Prot;Acc:P0DI10]	0.09	0.1	0	0	0.13	0.18	0.13	0.16	0.12	0.17	0.04	0.18	0.33	0.12	0.1	0.04	0.21	0.16
AT1G05243		-	0	0.02	0	0.32	0	1.09	0	0.01	0	1.62	1.63	0.22	0.87	0	0.57	0.76	0	0.99
AT1G05247		-	0	0	0	0	0	0	0	0	0	0	0	0	0	0	0	0	0	0
AT1G05250	PER2	Peroxidase 1 [Source:UniProtKB/Swiss-Prot;Acc:P0DI10]	0	0	0.1	0.08	0	0	0	0	0.06	0	0.03	0	0	0	0	0.06	0	0
AT1G05253		-	0	0	0	0	0	0	1.09	0	0	0	0	0	0	0	0	0	0	0
AT1G05257		-	0	0	0	0	0	0	0	0	0	0	0	0	0	0	0	0	0	0
AT1G05260	PER3	Peroxidase [Source:UniProtKB/TrEMBL;Acc:Q0WSR2]	382.88	330.83	318.18	403.22	372.22	374.29	308.54	321.84	297.86	518.73	520.89	507.1	312.59	324.32	317.29	270.38	259.16	276.88
AT1G05263		-	0	0	0	0	0	0	0	0	0	0	0	0	0	0	0	0	0	0
AT1G05267		-	0.23	0.92	0	0	0.69	0.69	0.29	0	0.21	0	0	0	0.19	0.39	0.17	0.22	0	0.85
AT1G05270		At1g05270 [Source:UniProtKB/TrEMBL;Acc:Q8GXY6]	40.31	42.55	42.99	45.61	49.11	48.64	46.01	46.52	47.95	49.92	51.7	51.97	51.59	52.23	52.04	61.11	57.95	57.93
AT1G05273		-	0	0	0	0	0	5.25	0	0	11.03	0	0	7.53	0	1.99	17.54	5.51	12	0
AT1G05277		-	1.61	2.12	2.77	2.82	1.54	2.32	2.17	1.81	2.24	1.61	1.85	2.46	2.77	3.03	1.77	1.61	3.35	2.29
AT1G05280		Protein of unknown function (DUF604) [Source:TAIR;Acc:AT1G05280]	12.3	13.31	13.47	21.2	24.56	23.51	43.1	45.97	44.76	50.54	53.09	56.33	59.59	58.68	59.74	86.09	92.14	84.63
AT1G05283		-	0	0	0	0	0	0	0	0	0	0	0	0	0	0	0	0	0	0
AT1G05287		-	0.33	3.47	1.92	2.07	0.62	0	0.87	1.04	2.75	0	4.92	2.7	0.82	2.66	7.01	1.5	2.02	1.47
AT1G05290		CCT motif family protein [Source:UniProtKB/TrEMBL;Acc:Q1PFY3]	0	0	0	0	0	0	0	0	0	0	0.09	0	0.16	0.35	0.2	0.15	0	0.14
AT1G05291		GPI inositol-deacylase C, putative (DUF1218) [Source:UniProtKB/TrEMBL;Acc:O23040]	10.54	8.08	7.04	6.2	7.1	7.88	2.37	2.24	4.12	4.68	3.57	2.2	3.49	3.97	3.11	3.07	3.75	2.83
AT1G05293		-	0	0	0	0	0	0	0.96	0	0	0	0	0	0	0	0	0	0.98	0
AT1G05297		-	0	0.57	0	0	0	0	0	0	0	0	0	0	0	0	0	0	0	0.64
AT1G05300	ZIP5	Zinc transporter 5 [Source:UniProtKB/Swiss-Prot;Acc:O23039]	3.31	3.6	3.96	5.84	5.84	6.15	13.65	13.39	13.41	8.72	7.31	9.24	11.21	11.38	12.06	18.28	17.85	18.84
AT1G05303		-	0	0	0	0	0	0	0	0	0	0	0	0	0	0	0	0	0	0
AT1G05307		-	0	0	0	0	0	0	0	0	0	0	0	0	0	0	0	0	0	0
AT1G05310	PME8	Probable pectinesterase 8 [Source:UniProtKB/Swiss-Prot;Acc:O23038]	0.03	0	0.14	0	0	0.11	0	0	0.06	0.04	0	0.11	0.12	0.03	0.04	0.04	0	0.03
AT1G05313		-	0	0	0	0	0	0	0	0.75	0	0	0	1.85	0	0	0	0	0	0
AT1G05317		-	0.5	0.86	0.8	0.74	0.51	0.82	0.64	0.46	0.35	0.44	0.75	0.99	0.73	0.12	0.41	0	0.53	0.5
AT1G05320		FUNCTIONS IN: molecular_function unknown; INVOLVED IN: biological_process unknown; LOCATED IN: cellular_component unknown; EXPRESSED IN: fruit, egg cell; CONTAINS InterPro DOMAIN/s: Prefoldin (InterPro:IPR009053); BEST Arabidopsis thaliana protein m /.../s: unknown protein (TAIR:AT2G32240.1); Ha. [Source:TAIR;Acc:AT1G05320]	11.57	17.51	16.84	10.98	9.86	9.25	6.25	7.44	6.01	4.69	4.67	5.31	6.35	6.48	5.7	9.08	8.98	9.45
AT1G05323		-	0	6.43	3.43	0	1.38	0	0	3.36	1.53	0	0	2.93	0	0	0	0	0	0
AT1G05327		-	0	0	0	0	0	0	0	0	0	0	0	0	0	0	0	0	0	0
AT1G05330		YUP8H12.5 [Source:UniProtKB/TrEMBL;Acc:O23036]	1.58	0.74	0.59	2.86	3.1	2.95	4.29	3.67	2.98	4.74	4.15	3.95	9.31	8.35	6.64	12.17	11.41	9.6
AT1G05333		-	0	0.86	0	0.45	0.49	0	0	0	0	0.58	0	0	0	0	0	0	0	2.27
AT1G05337		-	0	0	0	0	0	0	0	0	0	0	0	0	0	0	0	0	0	0
AT1G05340		Cysteine-rich TM module stress tolerance protein [Source:UniProtKB/TrEMBL;Acc:O23035]	12.15	10.32	10.65	19.35	17.89	21.04	38.96	38.97	41.07	85.94	82.84	82.61	119	109.64	108.65	166.57	172.31	174.93
AT1G05343		-	0	0	0	0	0	0	0	0	0	0	0	0	0	0	0	0	0	4.92
AT1G05347		-	0.3	0.43	0.36	0	0.68	0	0.08	0	0	0	0	0.21	0.38	1.45	0	0	0.65	0
AT1G05350		Ubiquitin-like modifier-activating enzyme 5 [Source:UniProtKB/Swiss-Prot;Acc:O23034]	36.24	41.42	43.38	45.59	46.99	45.05	54.34	57.21	53.45	64.02	62.96	60.38	69.12	71.25	67.09	68.2	69.14	68.96
AT1G05353		-	0	0	0	0	0	0	0	0	0	0	0	0	0	0	0	0	0	0
AT1G05357		-	0	0	0	0	0	0	0	0	0	0	0	0	0	0	0	0	0	0
AT1G05360	KMS2	Vacuole membrane protein KMS2 [Source:UniProtKB/Swiss-Prot;Acc:F4I8Q7]	21.39	20.75	22.17	16.87	17.68	16.73	15.79	16.64	17.48	25.18	26.95	25.05	22.16	20.93	19.4	17.4	18.51	17.37
AT1G05363		-	0	0	0	0	0	0	0	0	0	0	2.14	0	0	0	0	0	0	0
AT1G05367		-	0	0	0	0	0	0.62	0.59	0	0.56	0	0	1.42	0	0	0	0	1.83	0
AT1G05370		Sec14p-like phosphatidylinositol transfer family protein [Source:UniProtKB/TrEMBL;Acc:F4I8Q8]	0.88	1.13	0.79	5.75	6.2	6.65	12.66	15.26	12.77	7.16	6.93	6.5	14.79	13.33	14.39	14.1	14.25	12.68
AT1G05373		-	14.88	0	0	0	0	9.65	0	0	3.18	0	0	0	0	0	0	0	0	0
AT1G05377		-	1.27	0	0	0	0	0	0	0	0	0	0	0	0	0	0	0	0	2.9
AT1G05380		Acyl-CoA N-acyltransferase with RING/FYVE/PHD-type zinc finger protein [Source:UniProtKB/TrEMBL;Acc:Q9ZW00]	9.72	18.9	19.04	10.93	13.6	13.97	17.58	19.2	18.96	23.34	23.58	23.99	22.93	25.71	23.53	19.79	21.37	22.26
AT1G05383		-	0	0	0	0	0.14	0	1.55	1.87	2.85	0	0.41	0	0.64	0.27	0.15	0.31	0.58	0.42
AT1G05385	PSB27-2	Psb27-H1 [Source:UniProtKB/TrEMBL;Acc:A0A178WJM6]	14.43	11.17	12.54	16.43	15.2	11.28	9.27	9.28	9.57	10.29	8.61	8.84	7.28	5.97	8.22	5.14	4.1	7.25
AT1G05387		-	0	0	0	0	0	0	0	0	0	0	0	0	0	0	0	0	0	0.65
AT1G05390		pre-tRNA [Source:TAIR;Acc:AT1G05390]	0	0	0	0	0	0	0	0	0	0	0	0	0	0	0	0	0	0
AT1G05397		-	2.63	2.37	2.19	1.9	1.29	3.02	2.83	1.82	2.06	3	3.78	2.46	3.75	3.34	5.43	3.74	4.78	3.59
AT1G05400		Putative uncharacterized protein [Source:UniProtKB/TrEMBL;Acc:Q5XVL8]	2.76	2.13	1.4	2.69	1.89	3.72	2.38	3.69	2.58	3.64	3.29	2.96	4.47	3.28	3.31	5.14	4.32	3.73
AT1G05407		-	0	0	0	0	0	0	0	0	0	0	0	0	0	0	0	0	0	0
AT1G05410		At1g05410/T25N20_5 [Source:UniProtKB/TrEMBL;Acc:Q8VZE5]	19.38	20.9	22.98	30.06	28.06	28.63	31.82	34.96	32.72	40.44	44.55	40.15	45.47	42.5	43.93	44.33	44.66	42.28
AT1G05413		-	0	0	0	0	0	0	0	0	0	0	0	0	0	0	0	0	0	0
AT1G05417		-	0	0	0	0	0	0	0	0	0	0	0	0	0	0	0	0	0	0
AT1G05420	ATOFP12	ovate family protein 12 [Source:TAIR;Acc:AT1G05420]	0.51	0.34	0.12	1.64	0.78	1.97	5.7	8.05	7.81	3.69	2.87	2.58	6.53	8.45	7.69	10.1	9.16	11.11
AT1G05423		-	0	0	0	0	0	0	0	0	0	0	0	0	0	0	0	0	0	0
AT1G05427		-	0	0	0	0	0	0	0	0	0	0	0	0	0	0	0	0	0	0
AT1G05430		Uncharacterized protein At1g05430 [Source:UniProtKB/TrEMBL;Acc:Q8LC42]	37.29	30.96	31.81	30.97	29.99	30.47	27.02	27.66	30.05	39.12	33.99	37.74	37.41	35.75	35.23	40.53	40.45	40.93
AT1G05433		-	0	0	0	0	0	0	0	0	0	0	0	0	0	0	0	0	0	0
AT1G05440		C-8 sterol isomerase [Source:UniProtKB/TrEMBL;Acc:Q9ZVZ4]	1.3	1.44	1.91	7.83	7.49	7.89	12.78	13.44	12.91	13.35	14.29	14.78	21.14	21.59	20.58	19.89	19.13	20.44
AT1G05443		-	0	0	0	0	0	0	0	0	0	0	0	0	0	0	0	0	0	0
AT1G05447		-	0	0	0	0	0	0	0	0	0	0	0	0	0	0	0	0	0	0
AT1G05450		Bifunctional inhibitor/lipid-transfer protein/seed storage 2S albumin superfamily protein [Source:UniProtKB/TrEMBL;Acc:Q1G2Y5]	0.84	0.88	0.88	0.15	0.26	0.14	0.13	0.24	0.18	0.37	0.45	0.36	2.56	2.39	3.64	37.7	40.57	36.05
AT1G05453		-	0	0	0	0	0	0	0	0	0	0	0	0	0	0	0	0	0	0
AT1G05460	SDE3	Probable RNA helicase SDE3 [Source:UniProtKB/Swiss-Prot;Acc:Q8GYD9]	7.41	14.35	15.47	12.24	13.81	13.74	13.51	14.61	15.12	19.43	18.42	19.52	22.09	22.7	25.21	22.78	22.47	21.95
AT1G05463		-	0	0	0	0	0	0	0	0	0	0	0	0	0	0	0	0	0	6.91
AT1G05467		-	0	0	0	0	0	0.52	0	0	0	0.73	0	0	0	0	0	0	0	0
AT1G05470	IP5P6	CVP2 [Source:UniProtKB/TrEMBL;Acc:A0A178WIE4]	0.62	1.28	1.05	1.29	1.61	1.02	3.53	3.52	3.74	0.81	1.03	0.88	1.19	1.3	1.25	0.84	1	1.17
AT1G05473		-	0	0	0	0	0	0	0	0	0	0	0	0	0	0	0	3.67	0	0
AT1G05477		-	0	0	0	0	0	0	0	0	0	0	0	0	0	0	0	0	0	0
AT1G05483		-	0	0	0	0	0	0	0	0	0	0	0	0	0	0	0	0	0	0
AT1G05487		-	0	0	0	0	0	0	0	0	0	0	0	0	0	0	0	0	0.16	0
AT1G05490	CLSY3	SNF2 domain-containing protein CLASSY 3 [Source:UniProtKB/Swiss-Prot;Acc:F4I8S3]	44.05	57.66	58.27	38.26	38.6	39.54	45.95	49.01	45.79	58.14	54.1	60.54	41	44.25	42.72	32.89	32.78	32.57
AT1G05493		-	0	0	0	0	0	0	0	0	0	0	0	0	0	0	0	0	0	0
AT1G05497		-	0	0	0	0	0	0	0	0	0	0	0	0	0	0	0	0	0	0
AT1G05500	SYT5	Synaptotagmin-5 [Source:UniProtKB/Swiss-Prot;Acc:Q8L706]	50.65	46.1	47.8	48.54	49.41	45.49	52.56	52.34	49.54	60.65	57.69	61.85	52.27	53.51	58.23	52.52	51.73	52.01
AT1G05507		-	0	0	0	0	0	0	0	0	0	0	0	0	0	0	0	0	0	0
AT1G05510	OBAP1A	Oil body-associated protein 1A [Source:UniProtKB/Swiss-Prot;Acc:Q9ZVY7]	1.11	1.31	0.92	0.59	1	0.54	0.34	0.13	0.31	0.39	0.49	0.31	2.31	2.18	2.25	7.77	8.56	9.46
AT1G05517		-	0.84	0	3.1	0	1.97	0	2.7	0	0	3.26	6.46	6.66	0	2.71	1.87	0	0	0
AT1G05520		At1g05520/T25N20_16 [Source:UniProtKB/TrEMBL;Acc:Q8H0S3]	19.2	27.36	29.26	17.32	18.49	20.64	25.94	30.71	27.57	33.72	34.63	37.18	41.75	43.59	43.35	42.85	41.7	42.49
AT1G05523		-	2.27	3.27	3.05	0.21	2.98	3.3	6.36	0	2.34	0.35	2.42	2.93	3.56	0	0	3.51	0.88	0
AT1G05527		-	0	0	0	0	0	0	0	0	0	0	0	0	0	0.21	0	0	0	0
AT1G05530	UGT75B2	UGT75B2 [Source:UniProtKB/TrEMBL;Acc:A0A384L0M1]	0	0	0	0	0.03	0	0.09	0.38	0.13	0.07	0.2	0.09	0.26	0.08	0.12	0.06	0.03	0.17
AT1G05533		-	0	0	0	0	0	0	0	0	0	0	0	0	0	0	0	0	0	0
AT1G05537		-	0	0	0	0	0	0	0	0	0	0	0	0	0	0	0	0	0	0
AT1G05540		T25N20.19 [Source:UniProtKB/TrEMBL;Acc:Q9ZVY4]	19.7	20.23	18.97	14.52	11.76	15.29	6.88	7.6	7.11	6.36	5.5	4.41	7.93	7.19	7.62	9.25	8.98	9.07
AT1G05543		-	16.95	12.03	5.06	12.65	7.96	11.56	2.89	4.08	2.55	1.5	5.27	1.06	2.48	1.42	2	0.75	2.01	2.8
AT1G05547		-	0	0	0	0	0	0	0	0	0	0	0	0	0	0	0	0	0	0
AT1G05550		Protein of unknown function (DUF295) [Source:TAIR;Acc:AT1G05550]	1.31	0.33	0.7	0.37	0.51	0.45	0.08	0.25	0.23	0.32	0.55	0.09	0.12	0.15	0.22	0.29	0.08	0.18
AT1G05553		-	0.63	0.47	0.68	0.5	0.73	0	0.42	0.3	0	0.32	0	1.66	0	0	1.09	0	0.46	0.41
AT1G05557		-	2.81	2.09	2.67	4.03	0	2.07	1.5	0	2.54	5.23	3.06	1	4.07	2.99	2.64	3.06	0.17	3.74
AT1G05560	UGT1	UDP-glucosyltransferase 75B1 [Source:TAIR;Acc:AT1G05560]	0.43	0.48	0.47	0.42	0.23	0.55	3.74	2.95	3.95	0.21	0.27	0.28	1.26	0.82	1.08	1.57	1.37	1.3
AT1G05562		Potential natural antisense gene, locus overlaps with AT1G05560 [Source:TAIR;Acc:AT1G05562]	0	0	0	0	0	0	0	0	0	0	0	0	0	0	0	0	0	0
AT1G05563		-	0	0	0	0	0	0	0	0	0	0	0	0	0	0	0	0	0	0
AT1G05567		-	0	0	0	0	0	0	0	0	0	0	0	0	0	0	0	0	0	0
AT1G05570	CALS1	Callose synthase 1 [Source:UniProtKB/Swiss-Prot;Acc:Q9AUE0]	15.51	24.49	24.18	18.42	21.68	20.59	19.33	22.98	20.38	19.43	18.72	20.87	17.33	17.17	17.49	16.66	15.25	16.23
AT1G05575		Transmembrane protein [Source:UniProtKB/TrEMBL;Acc:Q8LC91]	0.18	0.1	0.09	0.1	0.18	0	0	0.11	0	0.21	0	0.1	0.21	0.17	0.1	0	0	0.27
AT1G05577		F3F20.2 protein [Source:UniProtKB/TrEMBL;Acc:Q9SYJ8]	0.13	0.07	0.1	0.04	0.16	0.07	0.23	0.04	0.24	0.15	0.16	0	0.04	0.09	0.07	0.21	0.2	0.09
AT1G05580	CHX23	Cation/H(+) antiporter 23, chloroplastic [Source:UniProtKB/Swiss-Prot;Acc:Q8VYD4]	0.33	0.46	0.27	0.11	0.06	0.13	0.02	0.02	0.05	0.07	0.04	0.07	0.07	0.01	0.07	0.05	0.1	0.09
AT1G05583		-	0	0	0	0	0	0	0	0	0	0	0	0	0	0	0	0	0	0
AT1G05587		-	0	0	0	0	0	0	0	0	0	0	0	0	0	0	0	0	0	0
AT1G05590	HEXO2	Beta-hexosaminidase 2 [Source:UniProtKB/Swiss-Prot;Acc:Q9SYK0]	15.7	16.54	17.36	10.03	11.25	12.42	10.49	10.13	10.27	10.73	10.01	10.48	9.82	9.51	9.04	9.21	8.51	9.31
AT1G05593		-	0	0	0	0	0	0	0	0	0	0	0	0	0	0	0	0	0	0
AT1G05597		-	0	0	0	0	0	0	0	0	0	0	0	0	0	0	0	0	0	0
AT1G05600		Pentatricopeptide repeat-containing protein At1g05600 [Source:UniProtKB/Swiss-Prot;Acc:Q9SYK1]	3.23	4.69	5.02	3.73	3.91	3.81	3.75	3.93	2.86	4.32	4.31	4.32	3.71	4.15	4.86	4.32	3.83	3.41
AT1G05603		-	0	0	0	0	0	0	0	0	0	0	0	0	0	0	0	0	0	0
AT1G05607		-	0	0	0	0	0	0	0	0	0	0	0	0	0	0	0	0	0	0
AT1G05610	APS2	ADP-glucose pyrophosphorylase small subunit 2 [Source:TAIR;Acc:AT1G05610]	0.24	0.07	0.06	0.14	0.03	0.16	0.03	0.03	0.06	0.17	0.03	0.03	0.14	0.11	0.2	0.43	0.25	0.59
AT1G05613		-	0	0	0	0	0	0	0.96	0	0	0	0	0	0	0.96	0	0	0	0
AT1G05615		Putative B3 domain-containing protein At1g05615 [Source:UniProtKB/Swiss-Prot;Acc:F4I8U3]	0	0	0	0	0	0	0	0	0	0	0	0	0	0	0	0	0	0
AT1G05617		-	0	0	0	0	0	0	0	0	0	0	0	0	0	0	0	0	0	0
AT1G05620	URH2	Probable uridine nucleosidase 2 [Source:UniProtKB/Swiss-Prot;Acc:Q8LAC4]	23.2	19.36	21.06	24.27	26.97	24.96	25.22	24.28	26.33	28.01	28.51	29.18	31.27	33.57	33.46	32.15	32.97	32.03
AT1G05623		-	0	0	0	0	0	0	0	0	0	0	0	0	0	0	0	0	0	0
AT1G05627		-	0	0	0	0	0	0	0	0	0	0	0	0	0	0	0	0	0	0
AT1G05630	AT5PTASE13	Endonuclease/exonuclease/phosphatase family protein [Source:TAIR;Acc:AT1G05630]	4.07	5.52	4.85	4.93	6.24	5.8	7.87	8.43	8.3	5.91	5.56	6.23	7.06	7.58	7.24	5.81	5.54	5.67
AT1G05633		-	0	0	0	0	0	0	0	0	0	0	0	0	0	0	0	0	0	0
AT1G05637		-	0	0	0	0	0	0	0	0	0	0	0	0	0	0	0	0	0	0
AT1G05640		Ankyrin repeat family protein [Source:UniProtKB/TrEMBL;Acc:Q9SYK5]	2.32	3.1	3.92	2.14	2.16	2.06	2.77	3.2	3.36	2.49	2.22	2.64	1.71	2.09	1.92	1.73	1.54	1.82
AT1G05643		-	0	0	0	0	0	0	0	0	0	0	0	0	0	0	0	0	0	0
AT1G05647		-	0	0	0	0	0	0	0	0	0	0	0	0	0	0	0	0	0	0
AT1G05650		F3F20.10 protein [Source:UniProtKB/TrEMBL;Acc:Q9SYK6]	0	0	0.03	0.04	0	0	0	0	0	0	0	0	0	0	0	0	0	0
AT1G05653		-	0	0	0	0	0	0	0	0	0	0	0	0	0	0	0	0	0	0
AT1G05657		-	0	0	0	0	0	0	0	0	0	0	0	0	0	0	0	0	0	0
AT1G05660		F3F20.11 protein [Source:UniProtKB/TrEMBL;Acc:Q9SYK7]	0	0	0.13	0.15	0.44	0.21	0.35	0.5	0.64	0.07	0.15	0.03	0	0.03	0.03	0.03	0.07	0
AT1G05663		-	0.1	0	0	0.6	0	0.22	0.41	0	0.19	0	0.7	0	0.25	0.1	0.22	0.23	0.11	0
AT1G05667		-	0	0	0	0	0	0	0	0	0	0	0	0	8.28	0	0	0	0	7.64
AT1G05670		Glycosyltransferase (Fragment) [Source:UniProtKB/TrEMBL;Acc:A0A068FPW3]	2.63	4.73	4.61	3.2	3.85	3.65	3.51	3.93	3.26	3.83	3.28	4.12	2.57	2.87	2.66	2.51	2.52	2.02
AT1G05673		-	0	0	0	0	0	0	0	0	0	0	0	0	0	0	0	0	0	0
AT1G05675	UGT74E1	Glycosyltransferase (Fragment) [Source:UniProtKB/TrEMBL;Acc:A0A1W6AJW6]	0	0	0	0	0	0	0	0	0	0	0	0	0	0.09	0	0	0	0
AT1G05680	UGT74E2	Glycosyltransferase (Fragment) [Source:UniProtKB/TrEMBL;Acc:A0A0K1SBE8]	0	0.03	0.08	0	0	0.03	0	0	0.02	0	0	0.09	0.22	0.08	0.32	0.09	0.09	0.18
AT1G05683		-	0	0	0	0	0	0	0	0	0	0	0	0	0	0	0	0	0	0
AT1G05687		-	0.41	0.43	0.32	0.71	0.86	0.98	0.81	0.94	0.11	0.63	0.1	0	0.26	0.83	0.64	0.51	0.97	0.71
AT1G05690	BT3	BTB/POZ and TAZ domain-containing protein 3 [Source:UniProtKB/Swiss-Prot;Acc:Q9SYL0]	1.24	1.21	2	1.77	1.13	1.45	1.09	0.88	0.71	1.5	1.46	1.03	0.79	0.86	0.81	0.79	0.66	0.7
AT1G05693		-	0	0	0	0	0	0	0	0	0	0	0	0	0	0	0	0	0	0
AT1G05697		-	0	0	0	0	0	0	0	0	0	0	0	0	0	0	0	0	0	0
AT1G05700		Leucine-rich repeat transmembrane protein kinase protein [Source:TAIR;Acc:AT1G05700]	0	0.05	0	0	0	0.02	0	0	0	0	0.06	0	0	0	0	0	0	0
AT1G05703		-	0	0	0	0	0	0.23	0	0	0	0	0.21	0	0	0	0	0	0	0
AT1G05707		-	0	0	0	0	0	0	0	0	0	0.25	0.21	0	0	0	0	0	0	0.22
AT1G05710		-	24.4	19.85	20.92	17.14	18.15	18.58	9.53	11.59	9.12	9.1	6.73	8.37	5.6	5.86	5.77	4.51	6.02	7.36
AT1G05713		-	0	0	0	0	0	0	0	0	0	0	0	0	0	0	3.91	0	0	0
AT1G05717		-	0	0	0	0	0	0	0	0	0	0	0	0	0	0	0	0	0	0
AT1G05720		Selenoprotein family protein [Source:UniProtKB/TrEMBL;Acc:Q8GWP6]	90.94	86.76	84.53	100.36	103.33	96.92	79.02	77.37	70.46	88.74	86.91	84.55	86.55	84.68	90.88	81.52	91.5	82.15
AT1G05723		-	0	0	0	0	0	0	0	0	1.6	0	0	0	0	0	0	0	0	0
AT1G05727		-	0	0	0	0.22	3.09	0.01	1.71	0.31	0	8.72	0	2.66	2.39	0	0.09	0.14	0.42	5.23
AT1G05730		FAM136A-like protein (DUF842) [Source:UniProtKB/TrEMBL;Acc:Q5BQ23]	7.47	5.91	6.8	8.81	9.55	7.99	3.12	1.9	2.39	9.79	9.38	8.19	8.33	6.25	6.42	5.66	6.03	5.55
AT1G05733		-	11.39	13.07	11.81	6.04	7.71	11.05	8.21	10.4	8.14	2.99	2.81	3.44	1.84	1.41	1.97	0.68	0.16	1.27
AT1G05737		-	0	0	0	0	0	0	0	0	0	0	0	0	0	0	0	0	0	0
AT1G05740		F3F20.19 protein [Source:UniProtKB/TrEMBL;Acc:Q9SYL5]	0.15	0.35	0	0.36	0.31	0	0	0	0	0.18	0	0	0	0	0.5	0	0.16	0.16
AT1G05747		-	0	0	0	0	0	0	0	0	0	0	0	0	0	0	0	0	0	0
AT1G05750	PDE247	Pentatricopeptide repeat-containing protein At1g05750, chloroplastic [Source:UniProtKB/Swiss-Prot;Acc:Q9MA50]	1.52	2.58	2.15	2.24	2.4	2.36	2.27	2.22	2.42	2.52	2.24	2.21	2.15	1.89	2.44	1.92	1.95	2
AT1G05753		-	0.63	0.14	0	0	0.74	0	0.05	0	0.15	0.37	0.31	0	0.49	0	0.2	0.53	0.5	0
AT1G05757		-	0	1.85	0.57	0.59	0	1.08	1.03	0	0	0	0.52	0.61	0.6	0	1.62	0	1.59	0
AT1G05760	RTM1	Mannose-binding lectin superfamily protein [Source:TAIR;Acc:AT1G05760]	2.48	0.98	1.94	0.25	0.33	0.67	0.11	0	0	0	0	0.11	0.23	0.34	0.12	0	0	0
AT1G05763		-	0	0	0	0	0	0	0	0	0	0	0	0	0	0	1.1	0	0	0
AT1G05767		-	15.13	16.36	11.9	24.66	24.17	24.87	13.56	20.78	20.26	6.27	16.91	16.15	20.31	16.3	15.77	20.34	19.29	19.33
AT1G05770	JAL2	Jacalin-related lectin 2 [Source:UniProtKB/Swiss-Prot;Acc:Q9MA49]	0.68	0.6	0.56	0	0.08	0.41	0	0.18	0.07	0	0.08	0	0.18	0	0	0.17	0.16	0.38
AT1G05773		-	4.2	2.88	2.86	5.65	3.83	2.13	3.45	3.41	2.02	5.07	4.26	3.25	7.25	3.46	3.3	4.59	4.34	4.87
AT1G05777		-	0	0	0	0	0	0	1.91	0	0	0	0	0	0	0	0	0	0	0
AT1G05780		Vacuolar ATPase assembly integral membrane protein VMA21 homolog [Source:UniProtKB/TrEMBL;Acc:Q58G56]	10.5	8.19	11.24	11.96	11.01	12.76	10.94	11.22	9.66	15.44	16.37	14.62	15.17	15.1	13.19	16.92	15.48	17.74
AT1G05783		-	1.89	2.55	1.34	1.37	1.79	2.16	1.11	2.32	1.96	1.56	2.64	2.89	3.13	2.44	2.08	2.39	1.57	1.88
AT1G05785		Got1/Sft2-like vescicle transport protein family [Source:TAIR;Acc:AT1G05785]	23.29	16.35	16.58	21.75	19.6	19.04	12.31	16.33	12.9	16.34	15.23	15.3	14.04	14.61	12.28	14.43	14.32	16.02
AT1G05787		-	0	0.18	0	0	0	0.14	0	4.47	1.27	0	0	0	0	0.66	0.36	0	0.14	0
AT1G05790		lipase class 3 family protein [Source:TAIR;Acc:AT1G05790]	7.48	9.18	10.06	8.37	9.15	8.12	7.81	8.61	9.85	9.3	8.48	8.97	7.95	7.76	7.37	8.5	8.62	8.37
AT1G05793		-	0	0	0	0	0	0	0	0	0	0	0	0	0	0	0	0	0	0
AT1G05797		-	0	0	0	0	0	0	0	0	0	0	0	0	0	0	0	0	0	0
AT1G05800	DGL	Galactolipase DONGLE, chloroplastic [Source:UniProtKB/Swiss-Prot;Acc:Q9MA46]	0	0	0	0	0	0	0	0	0	0	0	0	0	0	0	0	0	0
AT1G05803		-	0	0	0	0	0	0	0	0	0	0	0	0	0	0	0	0	0	0
AT1G05805	BHLH128	Transcription factor bHLH128 [Source:UniProtKB/Swiss-Prot;Acc:Q8H102]	6.51	6.77	5.69	7.88	7.2	8.94	9.64	11.5	10.05	2.95	3.93	4.73	4.42	6.04	4.86	4.07	5.44	4.92
AT1G05807		-	0	0	0	0	0	0	0	0	0	0	0	0	0	0	0	0	0	0
AT1G05810	ARA	RAB GTPase homolog A5E [Source:TAIR;Acc:AT1G05810]	3.8	3.22	2.25	1.89	2.15	2.24	0.97	1.1	1.3	1.66	2.21	1.15	1.16	1.83	1.19	0.74	1.74	1.88
AT1G05813		-	0	0	0	0	0	0	0	0	0	0	0	0	0	0	0	0	0	0
AT1G05817		-	0	0	0	0	0	0	0	0	0	0	0	0	0	0	0	0	0	0
AT1G05820	SPPL5	Signal peptide peptidase-like 5 [Source:UniProtKB/Swiss-Prot;Acc:Q9MA44]	2.8	3.05	2.77	2.29	2.46	1.95	1.89	2.22	2.42	2.49	2.33	2.55	1.94	1.83	1.66	2.48	2.26	1.85
AT1G05823		-	0	0	0	0	0	0	0	0	0	0	0	0	0	0	0	0	0	0
AT1G05827		-	0	0	0	0	0	0	0	0	0	0	0	0	0	0	0	0	0	0
AT1G05830	ATX2	Histone-lysine N-methyltransferase ATX2 [Source:UniProtKB/Swiss-Prot;Acc:P0CB22]	6.82	12.74	12.32	9.9	10.83	11.07	11.7	13.99	12.98	15.26	14.66	15.8	17.69	18.9	16.96	17.35	19.22	18.48
AT1G05833		-	0.37	0.95	0.59	0.77	1.69	1.22	1.05	1.11	1.23	1.87	1.2	2.18	4.87	3.77	3.68	4.16	3.67	2.89
AT1G05835		Uncharacterized protein At1g05835 [Source:UniProtKB/Swiss-Prot;Acc:A8MS78]	0.93	1.23	0.87	0.7	1.36	1.4	9.49	9.58	11.26	0.79	0.34	0	1.25	0.58	1.18	0	0.52	0.35
AT1G05837		-	0.16	0	0.16	0	0.32	0	0.16	0	0.15	0	0	0.07	0.19	0	0.35	0.3	0.59	0
AT1G05840		Eukaryotic aspartyl protease family protein [Source:UniProtKB/TrEMBL;Acc:F4IAD5]	31.32	34.59	34.13	32.36	34.9	33.74	37.22	36.16	35.09	50.17	54.62	52.37	50.07	49.14	51.57	56.18	55.36	54.4
AT1G05843		-	0	0	0.15	0	0	0.13	0	0	0	0.14	0	0.3	0	0	0	0	0	0.12
AT1G05847		-	0	0	0	0	0	0	0	0	0	0	0	0	0	0	0	0	0	0
AT1G05850	CTL1	Chitinase-like protein 1 [Source:UniProtKB/Swiss-Prot;Acc:Q9MA41]	600.3	612.89	591.06	675.47	670.39	678.46	755.07	792.55	775.81	831.64	822.41	860.78	680.31	680.35	690.48	623.69	625.62	641.2
AT1G05853		-	0	0	0	0	0	0	0	0	0	0	0	0	0	0	0	0	0	0
AT1G05857		-	0	0	0	0	0	0	0	0	0	0	0	0	0	0	0	0	0	0
AT1G05860		INO80 complex subunit D-like protein [Source:UniProtKB/TrEMBL;Acc:Q9MA40]	9.48	11.52	12.47	10.71	11.19	11.66	9.71	10.16	9.77	13.76	14.81	14.77	11.52	11.55	11.04	12.35	12.29	12.6
AT1G05863		-	0	0	0	0	0	0	0	0	0	0	0	0	0	0	0	0	0	0
AT1G05867		-	0	0.72	3.34	0	0.64	1.26	1.79	1.75	2.25	0.71	3.02	5.74	5.57	4.7	2.5	2.68	0.62	4.93
AT1G05870		At1g05870 [Source:UniProtKB/TrEMBL;Acc:Q9MA39]	19.31	15.05	14.97	15.28	13.19	14.42	13.28	14.42	14.46	13.96	15.35	11.76	9.91	10.48	11.39	10.34	10.48	10.07
AT1G05873		-	0	0	0	0	0	0	0	0	0	0	0	0	0	0	0	0	0	0
AT1G05880	ARI12	Probable E3 ubiquitin-protein ligase ARI12 [Source:UniProtKB/Swiss-Prot;Acc:Q84RQ9]	0	0	0	0	0	0	0	0	0	0	0	0	0	0	0	0	0	0
AT1G05887		-	0	0	0	0	0	0	0	0	0	0	0	0	0	0	0	0	0	0
AT1G05890	ARI5	RBR-type E3 ubiquitin transferase [Source:UniProtKB/TrEMBL;Acc:F4IAE4]	11.63	15.5	16.83	18.93	21.89	20.32	22.97	25.57	23.42	36.25	36.11	34.73	42.25	41.29	41.24	47.78	43.37	48.05
AT1G05893		-	0	0	0	0	0	0	0	0	0	0	0	0	0	0	0	0	0	0
AT1G05894		T20M3.17 protein [Source:UniProtKB/TrEMBL;Acc:Q9MA36]	0.18	0.05	0.24	0.33	0.17	0.02	0	0.24	0	0	0	0	0	0	0.06	0	0	0.04
AT1G05897		-	0	0	0	0	0	0	0	0	0	0	0	0	0	0	0	0	0	0
AT1G05900	NTH2	Endonuclease III homolog [Source:UniProtKB/TrEMBL;Acc:A0A178W393]	7.68	6.53	6.3	8.9	8.53	8.88	6.95	6.31	6.49	8.55	8.14	9.91	8.64	8.55	8.19	8.06	7.63	8.41
AT1G05903		-	0	0	0	0	0	0	0	0	0	0	0	0	0	0	0	0	0	0
AT1G05907		-	0	0	0	0	0	0	0	0	0	0	0	0	0	0	0	0	0	0
AT1G05910		ATPase family AAA domain-containing protein At1g05910 [Source:UniProtKB/Swiss-Prot;Acc:F4IAE9]	14.48	25.33	24.64	21.23	21.72	22.41	29.57	33.79	32.25	34.67	35.69	35.68	43.27	42.71	42	41.1	41.11	41.98
AT1G05913		-	1.09	0	3.87	0.66	0.61	0.61	0.58	0	0	2.75	0	0.69	2.02	1.14	0	0	0	0
AT1G05917		-	0	0	0	0	0	0	0	0	0	0	0	0	0	0	0	0	0	0
AT1G05920		B3 domain-containing protein At1g05920 [Source:UniProtKB/Swiss-Prot;Acc:Q5RM09]	0	0.07	0	0	0	0	0.03	0.04	0	0	0	0	0	0	0	0	0	0
AT1G05927		-	0	0	0	0	0	0	0	0	0	0.04	0	0	0	0	0	0	0.09	0
AT1G05930		B3 domain-containing protein At1g05930 [Source:UniProtKB/Swiss-Prot;Acc:Q9MA32]	0	0	0	0	0	0	0.18	0	0	0	0	0	0.2	0	0	0.06	0	0
AT1G05933		-	0	0	0	0.11	0.09	0	0.09	0	0	0.43	0.09	0.2	0.21	0.62	0.4	0.31	0.2	0.55
AT1G05937		-	0	0	0	0	0	0	0.12	0	0.23	0	0.12	0	0.42	0	0	0.27	0.38	0.24
AT1G05940	CAT9	Cationic amino acid transporter 9, chloroplastic [Source:UniProtKB/Swiss-Prot;Acc:Q9C5D6]	24.34	30.88	30.41	25.84	28.23	25.62	27.33	30.05	29.98	33.4	32.08	34.15	33.83	34.91	33.64	31.94	32.6	35.59
AT1G05943		-	0	0	0	0	0	0	0.17	0	0	0	0	0	0	0	0	0	0	0
AT1G05947		-	0	0	0	0	0	0	0	0	0	0	0	0	0	0	0	0	0	0
AT1G05950		unknown protein; Ha. [Source:TAIR;Acc:AT1G05950]	13.78	16.12	17.71	15.17	15.86	16.25	12.23	13.02	12.48	9.71	10.41	10.13	7.87	7.53	5.99	6.71	5.73	5.75
AT1G05953		-	0	0	0	0	0	0	0	0	0	0	0	0	0	0	0	0	0	0
AT1G05957		-	0	0	0	0	0	0	0	0	0	0	0	0	0	0	0	0	0	0
AT1G05960		ARM repeat superfamily protein [Source:UniProtKB/TrEMBL;Acc:F4IAF6]	5.47	8.89	10.46	8.11	8.17	8.69	11.63	11.66	10.69	9.51	8.97	9.45	8.54	7.58	7.31	7.24	6.14	7.09
AT1G05963		-	0	0	0	0	0	0	0	0	0	0	0	0	0	0	0	0	0	0
AT1G05967		-	0	0	0	5.91	0	0	0	0	0	0	0	0	0	0	0	0	0	0
AT1G05970		RNA-binding (RRM/RBD/RNP motifs) family protein [Source:UniProtKB/TrEMBL;Acc:Q9LNE8]	12.34	10.61	11.77	11.47	12.57	11.51	11.32	8.81	9.12	11.01	12.27	11.72	11.07	10.86	10.83	9.86	11.56	10.78
AT1G05973		-	0	0	0.31	0	0	3.85	1.12	0	0	3.01	0	1.17	0	0	2.71	0	0	0
AT1G05977		-	0.55	0.22	1.21	0.44	0.58	0.82	0.77	1.21	0.89	1.12	0	0.43	0.22	0.37	0.2	0	0	0.38
AT1G05980		pre-tRNA [Source:TAIR;Acc:AT1G05980]	0	0	0	0	0	0	0	0	0	0	0	0	0	0	0	0	0	0
AT1G05983		-	0	0	0	0	0	0	0	0	0	0	0	0	0	0	0	0	0	0
AT1G05987		-	0	0	0.28	0.3	0	0	0.26	0	0.49	0	0	0.6	0.3	0.25	0	0	0	0
AT1G05990	CML7	Calmodulin-like protein 7 [Source:UniProtKB/Swiss-Prot;Acc:Q9LNE7]	0	0	0	0	0	0	0	0	0	0	0	0	0	0	0	0	0	0
AT1G05993		-	0	0	0	0	0	0	0	0	0	0	0	0	0	0	0	0	0	0
AT1G05997		-	0	0	0	0	0	0	0	0	0	0	0	0	0	0	0	0	0	0
AT1G06000	UGT89C1	Glycosyltransferase (Fragment) [Source:UniProtKB/TrEMBL;Acc:W8PVE7]	0.45	0.27	0.17	2.49	1.56	0.67	17.14	17.06	16.69	6.2	5.68	5.17	8.28	8.77	8.06	7.28	5.45	6.35
AT1G06002		Potential natural antisense gene, locus overlaps with AT1G06000 [Source:TAIR;Acc:AT1G06002]	0	0	0.23	0	0	0.72	0	0	0.65	0	0	0	0	0	0	0	0	0
AT1G06003		-	0	0	0	0	0	0	0	0	0	0	0	0	0.79	0	0	0	0	0
AT1G06007		-	0	0	0	0	0	0	0	0	0	0	0	0	0	0	0	0	0	0
AT1G06010		Basic leucine zipper/W2 domain protein [Source:UniProtKB/TrEMBL;Acc:Q84R19]	31.08	28.67	25.84	36.96	32.59	27.48	25.66	20.77	23.39	22.17	22.2	19.76	21.93	18.76	20.62	23.12	23.53	24.52
AT1G06013		-	0	0	0	0	0	0	0	0	0	0	0	0	0	0	0	0	0	0
AT1G06017		-	1.39	0	0	0	2.41	0	0	0	0	0	0.76	0	0	0	0.78	0	0	0.77
AT1G06020		Probable fructokinase-3 [Source:UniProtKB/Swiss-Prot;Acc:Q9LNE4]	0.92	1.18	1.05	1.04	0.49	0.5	0.32	0.95	0.66	0.21	1.1	0.96	0.57	0.7	0.77	0.39	0.71	0.66
AT1G06023		-	0	0	0	0	0	0	0	0	0	0	0.6	0	0	0	0	0	0	0
AT1G06027		-	0	0	0	0	0.5	0.26	0	0	0	0	0	0	0	0	0	0	0	0.25
AT1G06030		Probable fructokinase-2 [Source:UniProtKB/Swiss-Prot;Acc:Q9LNE3]	2.75	1.93	2.55	0.44	0.63	0.23	0.04	0.1	0.12	0.15	0.53	0.18	0.29	0.28	0.92	0.44	0.62	0.21
AT1G06033		-	0	0	0	47.1	0	32.7	0	0	0	0	0	0	0	0	0	0	0	0
AT1G06037		-	0	0	0	0	0	0	0	0	0	0	0	0	0	0	0	0	0	0
AT1G06040	BBX24	B-box zinc finger protein 24 [Source:UniProtKB/Swiss-Prot;Acc:Q96288]	123.12	110.31	107.41	150.27	144.67	138.39	186.61	181.24	176.57	101.86	99.52	98.98	122.99	120.55	120.64	93.63	91.96	96.79
AT1G06043		-	0	0	0	0	0	0	0	0	0	0	0	0	0	0	0	0	0	0
AT1G06045		-	0	0	0	0	0	0	0	0	0	0	0	0	0	0	0	0	0	0
AT1G06047		-	0	0	0	0	0	0	0	0	0	0	0	0	0	0	0	0	0	0
AT1G06050		Protein of unknown function (DUF1336) [Source:TAIR;Acc:AT1G06050]	7.24	7.25	9.3	9.07	8.66	9.18	9.46	8.39	9.21	11.79	13.37	11.45	12.58	11.01	12.08	11.46	10.82	11.11
AT1G06053		-	0	0	0	0	0	0	0	0	0	0	0	0	0	0	0	0	0	0
AT1G06057		-	0	0	0	0.3	0	0	0	0.35	0	0	0	0	0.91	0	0	0	0	0
AT1G06060		At1g06060 [Source:UniProtKB/TrEMBL;Acc:Q9LNE1]	28.47	27.32	28.22	25.22	29.84	28.9	27.84	25.82	23.7	29.68	30.86	31.19	31.32	31.57	30.12	31.08	30.28	33.36
AT1G06063		-	0	0	0	0	0	0	0	0	0	0	0	0	0	0	0	0	0	0
AT1G06067		-	0	0	0	0	0	0	0	0	0	0	0	0	0	0	0	0	0	0
AT1G06070		At1g06070 [Source:UniProtKB/TrEMBL;Acc:Q9LNE0]	14.09	15.89	17.77	14.52	14.91	13.74	17.86	17.6	18.08	18.86	17.88	18.57	17.61	19.73	20.62	19.72	21.82	22.02
AT1G06073		-	0	0	0	0	0	0	0	0	0	0	0	0	0	0	0	0	0	0
AT1G06080	ADS1	Delta-9 acyl-lipid desaturase 1 [Source:UniProtKB/Swiss-Prot;Acc:O65797]	11.89	13.5	14.17	28.7	23.32	24.09	62.29	61.68	61.64	9.72	9.17	8.11	9.08	9.74	10.65	9.74	10.93	9.88
AT1G06083		-	3.41	1.47	0.68	0.69	5.81	1.27	1.81	1.77	4.55	3.6	3.06	2.9	1.41	2.38	2.53	4.07	5.6	7.49
AT1G06087		-	0	0	0	0	0	0	0	0	0	0	0	0	0	0	0	0	0	0
AT1G06090		Delta-9 desaturase-like 1 protein [Source:UniProtKB/Swiss-Prot;Acc:Q9LND9]	0	0	0	0	0	0	0	0	0	0	0	0	0.02	0.09	0.02	0.02	0.02	0.04
AT1G06093		-	1.95	0	0	0	0	0	0	0	0	0	0	0	0	0	0	0	0	0
AT1G06097		-	0	0	0	0	0	0	0	0	0	0	0	0	0	0	0	0	0	0
AT1G06100		Delta-9 desaturase-like 2 protein [Source:UniProtKB/Swiss-Prot;Acc:Q9LND8]	0	0.06	0	0	0	0	0	0	0	0	0	0	0	0	0	0	0	0
AT1G06103		-	0	0	0	0	0	3.87	0	0	0	0	0	0	0	2	0	0	0	0
AT1G06110	SKIP16	F-box protein SKIP16 [Source:UniProtKB/Swiss-Prot;Acc:Q9LND7]	30.38	26.67	27.08	27.13	26.2	25.8	23.27	21.94	21.79	21.23	20.8	20.98	16.63	16.19	18.77	19.81	18.29	17.82
AT1G06113		-	0	0	0	0	0	0	0	0	0	0	0	0	0	0	0	0	0	0
AT1G06117		-	0	0	0	0	0	0	0	0	0	0	0	0	0	0	0	0	0	0
AT1G06120		Delta-9 desaturase-like 3 protein [Source:UniProtKB/Swiss-Prot;Acc:Q9FPD5]	0	0	0	0	0	0	0	0	0	0	0	0	0	0	0	0	0	0
AT1G06123		-	0	0	0	0	0	0	0	0	0	0	0	0	0	0	0	0	0	0
AT1G06127		-	0	0	0	0	0	0	0	0	0	0	0	0	0	0	0	0	0	0
AT1G06130	GLX2-4	GLX2-4 [Source:UniProtKB/TrEMBL;Acc:A0A178WGQ2]	28.97	24.79	26.65	25.58	25.28	22.88	22.58	20.65	20.56	20.38	21.18	21.33	25.17	25.57	25.94	30.22	29.86	30.62
AT1G06133		-	0	0	0	0	0	0	0	0	0	0	0	0	0	0	0	0	0	0
AT1G06135		Transmembrane protein [Source:UniProtKB/TrEMBL;Acc:Q8LCX3]	0	0	0	0	0	0	0	0	0	0	0	0	0	0	0	0	0	0
AT1G06137		unknown protein; FUNCTIONS IN: molecular_function unknown; INVOLVED IN: biological_process unknown; LOCATED IN: endomembrane system; BEST Arabidopsis thaliana protein match is: unknown protein (TAIR:AT1G06135.1); Ha. [Source:TAIR;Acc:AT1G06137]	0	0	0	0	0	0	0	0	0	0	0	0	0	0	0	0	0	0
AT1G06140	PCMP-E61	Pentatricopeptide repeat-containing protein At1g06140, mitochondrial [Source:UniProtKB/Swiss-Prot;Acc:Q9LND4]	1.1	1.78	1.47	1.68	1.53	1.06	1.39	1.68	1.46	1.43	1.32	1.75	1.1	0.79	1	0.88	1.19	0.9
AT1G06143	EMB1444	Pentatricopeptide repeat-containing protein At1g06143 [Source:UniProtKB/Swiss-Prot;Acc:Q56X05]	3.79	5.28	4.41	5.91	5.26	5.33	4.08	3.84	3.32	5.61	6.48	5.42	4.36	4.46	4.17	4.46	3.62	3.79
AT1G06147		-	0	0	0	0	0	0	0	0	0	0	0	0	0	0	0	0	0	0
AT1G06148		Unknown gene [Source:TAIR;Acc:AT1G06148]	0	0	0	0	0	0.03	0	0	0	0	0	0	0.21	0	0.11	0	0.22	0
AT1G06150	EMB1444	basic helix-loop-helix (bHLH) DNA-binding superfamily protein [Source:TAIR;Acc:AT1G06150]	4.44	7.64	7.99	5.84	6.52	5.68	6.49	8.39	7.05	7.33	8.21	9.76	8.38	8.05	8.41	7.67	7.62	7.43
AT1G06153		-	0	0	0	0	0	0	0	0.64	0	0	0	0	0	0	0	0	0	0
AT1G06157		-	0	0	0	0	0	0	0	0	0	0	0	0	0	0	0	0	0	0
AT1G06160	ERF094	Ethylene-responsive transcription factor ERF094 [Source:UniProtKB/Swiss-Prot;Acc:Q9LND1]	0.44	0.38	0.6	0.51	0.58	0.47	0.1	0	0.05	0.11	0.1	0.16	0.17	0.14	0.11	0.05	0	0.14
AT1G06163		-	0	0	0	0	0	0	0	0	0	0	0	0	0	0	0	0.24	0	0
AT1G06170	BHLH89	Transcription factor bHLH89 [Source:UniProtKB/Swiss-Prot;Acc:Q9LND0]	0	0	0.03	0.11	0.09	0.03	0.66	0.35	0.63	0	0.03	0.14	0.11	0.09	0.17	0	0	0.09
AT1G06173		-	0	0.64	0.68	0	1.05	0.43	1.16	0.34	1.42	0.32	1.46	2.21	3.17	0.99	0.37	2.22	1.42	1.32
AT1G06177		-	0	0	0	0	0	0	0	0	0	0	0	0	0	0	0	0	0	0
AT1G06180	ATMYB13	Transcription factor MYB13 [Source:UniProtKB/Swiss-Prot;Acc:Q9LNC9]	0.1	0.11	0.36	0.81	1.17	1.07	8.49	7.12	7.14	0.35	0.34	0.43	0.51	0.56	0.48	0.44	0.57	0.15
AT1G06187		-	0	0	0	0	0	0	0	0	0	0	0	0	0	0	0	0	0	0
AT1G06190		Rho termination factor [Source:TAIR;Acc:AT1G06190]	20.68	22.41	21.91	27.84	28.07	29.09	38.66	38.62	37.78	40.6	39.2	39.78	30.56	29.98	33.67	28.29	27.34	25.1
AT1G06197		-	0	0	0	0	0	0	0	0	0	0	0	0	0	0	0	0	0	0
AT1G06200		Peptidase S24/S26A/S26B/S26C family protein [Source:TAIR;Acc:AT1G06200]	53.78	47.01	50.13	44.02	41.43	43.25	40.84	41	39.84	46.9	43.83	42.43	43.53	42.68	40.8	47.95	44.21	50.34
AT1G06203		-	0	0	0	0	0	0	0	0	0	0	0	0	0	0	0	0	0	0
AT1G06207		-	1.02	1.3	0.6	3.1	2.29	1.71	1.08	0	1.53	0	1.09	0	1.26	2.12	1.14	0	0	1.11
AT1G06210	TOL2	TOM1-like protein 2 [Source:UniProtKB/Swiss-Prot;Acc:Q9LNC6]	43.17	45.49	49.9	39.6	41.26	44.03	38.85	39.06	37.68	49.85	46.84	46.84	45.43	39.88	45.61	45.35	43.66	46.33
AT1G06213		-	0	0.07	2.23	0	0	0	0	0	0	0	0	0	1.32	0.67	0	0	0	0
AT1G06217		-	0	0	0.5	0	0	0.25	0	0.3	0.65	0	2.08	0.53	0.54	0.22	0.25	0.26	0.73	0.24
AT1G06220	CLO	110 kDa U5 small nuclear ribonucleoprotein component CLO [Source:UniProtKB/Swiss-Prot;Acc:Q9LNC5]	27.77	41.86	44.53	33	38.44	36.25	41.94	44.54	43.74	64.04	65.53	68.53	64.06	66.03	66.09	57.87	58.36	60.35
AT1G06225	CLE3	CLAVATA3/ESR (CLE)-related protein 3 [Source:UniProtKB/Swiss-Prot;Acc:Q3EDH8]	0	0	0	0	0	0	0	0	1.22	0	0.32	0.38	1.12	0	0	0	0	0
AT1G06227		-	10.45	20.17	18.37	11.21	13.4	15.62	12.81	16.28	14.95	14.88	14.6	15.26	13.18	7.9	8.09	10.32	14.6	13.12
AT1G06230	GTE4	Transcription factor GTE4 [Source:UniProtKB/Swiss-Prot;Acc:Q9LNC4]	17.22	30.14	34.36	32.58	33.41	32.67	37.5	43.34	40.86	40.72	40.74	42.11	42.53	45.3	45.04	41.51	41.18	41.29
AT1G06233		-	0	0	0	0	0	0	0	0	0	0	0	0	0	0	0	0	0	0
AT1G06237		-	0	0	0	0	0	0	0	0	0	0	0	0	0	0	0	0	0	0
AT1G06240		Uncharacterized protein At1g06240 [Source:UniProtKB/TrEMBL;Acc:Q8H109]	10.09	9.98	10.63	11.36	12.39	12.09	10.44	12.04	10.47	7.92	6.44	7.77	6.86	7.19	8.06	7.69	6.76	7.28
AT1G06243		-	0	0	0	0	0	0	0	0	0	0	0	0	0	0	0	0	0	0
AT1G06247		-	0	0	0	0	0	0	0	0	0	0	0	0	0	0	0	0	0	0
AT1G06250		Phospholipase A1-IIalpha [Source:UniProtKB/Swiss-Prot;Acc:Q9LNC2]	1.31	1.35	1.87	1.38	2.38	1.88	1.55	1.4	1.21	0.46	0.75	1.44	0.79	0.81	0.72	1.27	1.78	1.59
AT1G06253		-	0	0	0	0	0	0	0	0	0	0	0	0	0	0	0	0	0	0
AT1G06257		-	0	0	0	0	0	0	0	0	0	0	0	0	0	0	0	0	0	0
AT1G06260		Cysteine proteinases superfamily protein [Source:UniProtKB/TrEMBL;Acc:Q9LNC1]	0.14	0.27	0.18	0.38	1.12	0.99	0.42	0.55	0.57	0.11	0.39	0.27	0.43	0.38	0.51	0.74	0.64	0.73
AT1G06263		-	0	0	0	0	0	0	0	0	0	0	0	0	0	0	0	0	0	0
AT1G06265		other RNA [Source:TAIR;Acc:AT1G06265]	3.48	4.02	4.54	3.94	2.96	4.12	4.07	2.7	3.96	3.6	2.87	3.46	3.62	3.59	3.91	2.23	2.76	2.26
AT1G06267		-	0	0	0	0	0	0	0	0	0	0	0	0	0	0	0	0	0	0
AT1G06270		Pentatricopeptide repeat-containing protein At1g06270 [Source:UniProtKB/Swiss-Prot;Acc:Q9LNC0]	8.54	7.84	7.54	7.91	8.21	6.71	6.7	7.72	7.12	8.55	9.28	9.2	7.76	7.45	7.88	8.2	7.21	7.11
AT1G06273		-	0	0	0	0	0	0	0	0	0	0	0	0	0	0	0	0	0	0
AT1G06277		-	0	0	0	0	0	0	0	0	0	0	0	0	0	0	0	0	0	0
AT1G06280	LBD2	LOB domain-containing protein 2 [Source:UniProtKB/Swiss-Prot;Acc:Q9LNB9]	0	0	0	0	0	0.34	0.32	0.63	0.1	0	0	0	0	0	0	0	0.11	0
AT1G06283		-	0	0	0	0	0	0	0	0	0	0	0	0	0	0	0	0	0	0
AT1G06287		-	0	0	0	0	0	0	3.76	0	0.86	7.72	7.91	4.51	5.06	0	2.47	4.15	1.9	9.62
AT1G06290	ACX3	Acyl-coenzyme A oxidase 3, peroxisomal [Source:UniProtKB/Swiss-Prot;Acc:P0CZ23]	17.41	21.31	19.39	12.92	14.39	14.78	14.3	13.91	12.77	15.23	14.64	15.91	13.75	12.98	12.99	14.72	15.16	14.59
AT1G06293		-	0	0	0	0	0	0	0	0	0	0	0	0	0	0	0	0	0	0
AT1G06297		-	0	0	0	0	0	0	0	0	0	0	0	0	0	0	0	0	0	0
AT1G06303		-	0	0	0	0	0	0	0	0	0	0	0	0	0	0	0	0	0	0
AT1G06307		-	0	0	0	0	0	0	0	0	0	0	0	0	0	0	0	0	0	0
AT1G06310	ACX3.2	Putative acyl-coenzyme A oxidase 3.2, peroxisomal [Source:UniProtKB/Swiss-Prot;Acc:Q9LMI7]	0.23	0.4	0.69	1.45	1.37	1.44	3.12	3.52	3.07	2.56	2.83	3.27	2.54	2.41	2.5	1.97	1.92	1.96
AT1G06313		-	0	0	0	0	0	0.53	0.17	0	0.31	0	0	0	0	0	0	0	0	0
AT1G06317		-	0	0	2.09	0	0	0	0	0	0	0	0	0	0	0	0	2.01	0	0
AT1G06320		Putative uncharacterized protein [Source:UniProtKB/TrEMBL;Acc:Q3EDH7]	0.76	1.11	0.62	4.04	3.07	1.81	3.7	3.26	2.49	3	2.32	2.85	2.84	1.89	3.75	2.5	1.56	2.15
AT1G06323		-	0	0	0	0	0	0	0	0	0	0	0	0	0	0	0	0	0	0
AT1G06327		-	0	0	0	0	0	0	0	0	0	0	0	0	0	0	1.42	0	4.85	0
AT1G06330		Heavy metal transport/detoxification superfamily protein [Source:TAIR;Acc:AT1G06330]	0.24	0	0.06	0.14	0.11	0.06	0.23	0.27	0.05	0.34	0.17	0.06	0.13	0.16	0.5	0.07	0.12	0.17
AT1G06333		-	0	0	0	0.23	0	0	0	0	0.38	0.71	0.6	2.74	2.78	1.55	2.1	2.94	1.06	0.61
AT1G06337		-	0	0	0	0	0	0	2.36	0	2.15	0	0	0	1.78	0	7.57	0	0	0
AT1G06340		At1g06340 [Source:UniProtKB/TrEMBL;Acc:Q9LMI5]	0	0	0	0	0	0	0	0	0	0	0	0	0	0	0	0	0.08	0
AT1G06343		-	0	0	0	0	0	0	0	0	0	0	0	0	0	0	0	0	0	0
AT1G06347		-	0	0	0	0	0	0	0	0	0	0	0	0	0	0	0	0	0	0
AT1G06350		Delta-9 desaturase-like 4 protein [Source:UniProtKB/Swiss-Prot;Acc:Q9LMI4]	0	0	0	0	0	0.13	0.71	1.21	0.69	0.05	0	0	0.24	0.04	0.27	0.09	0.04	0.08
AT1G06353		-	0	0	0	0	0	0	0	0	0	0	0	0	0	0	0	0	0	0
AT1G06357		-	0	0	0	0	0	0	0	0	0	0	0	0	0	0	0.07	0	0	0
AT1G06360		Fatty acid desaturase family protein [Source:TAIR;Acc:AT1G06360]	0	0	0	0	0	0	0.6	0.4	0.6	0	0	0	0.09	0.08	0.09	0.04	0	0.12
AT1G06363		-	0	0	0	0	0	0	0	0	0	0	0	0	0	0	0	0	0	0
AT1G06373		-	0	0	0	0	0	0	0	0	0	0	0	0	0	0	0	0	0	0
AT1G06377		-	0	0	0	0	0	0	0	0	0	0	0	0	0	0	0	0	0	0
AT1G06380		Ribosomal protein L1p/L10e family [Source:UniProtKB/TrEMBL;Acc:Q9LMI1]	10.06	11.84	10.47	12.23	11.11	14.01	10.13	9.05	9.45	11.81	11.58	11.58	10.68	9.27	8.51	7.43	8.5	9.39
AT1G06383		-	0	0	0	0	0	0	0	0	0	0	0	0	0	0	0	0.26	0.24	0
AT1G06387		-	0	0.07	0.06	0	0.91	0.28	0.35	0.24	0.38	0.83	0.16	0.08	0.86	0.67	0.38	0.91	0.53	1.5
AT1G06390	ASK9	SK22 [Source:UniProtKB/TrEMBL;Acc:A0A178WCN5]	37.76	42.25	44.8	39.99	39.43	39.19	50.67	52.19	51.08	32.36	32.12	32.86	29.26	28.83	28.07	26.03	26.81	26.41
AT1G06393		-	0	0	0	0	0	0	0	0	0	0	0	0	0	0	0	0	0	0
AT1G06397		-	184.93	0	0	0	0	73.59	34.34	0	0	0	0	0	0	0	62.75	0	0	0
AT1G06400	RABA1A	Ras-related protein RABA1a [Source:UniProtKB/Swiss-Prot;Acc:P28185]	46.37	40.14	40.81	42.01	38.94	40.53	32.24	32.17	33.05	31.62	30.37	31.87	27.61	25.5	23.82	26.53	27.39	24.41
AT1G06403		-	0	0	0	0	0	0	0	0	0	0	0	0	0	0	0	0	0	0
AT1G06407		-	0.51	0.4	0.92	0.2	0.88	1.13	0.18	0	0.33	0.82	0.52	0.79	2.61	1.68	1.69	2.13	5.12	2.8
AT1G06410	TPS7	TPS7 [Source:UniProtKB/TrEMBL;Acc:A0A178WH64]	27.04	48.09	50.35	39.93	45	43.8	47.18	52.75	50.67	59.56	56.53	56.91	62.36	62.5	61	55.99	57.61	59.17
AT1G06413		-	0	0	0	0	0	0	0	0	0	0	0	0	0	0	0	0	0	0
AT1G06417		-	0	0	0	0	0	0	0	0	0	0	0	0	0	0	0	0	0	0
AT1G06420		DNA ligase-like protein [Source:UniProtKB/TrEMBL;Acc:Q9LMH9]	12.28	16.47	16.24	12.05	12.41	10.47	8.02	8.71	8.52	3.96	4.11	4.78	2.8	3.05	2.66	2.44	2.72	1.86
AT1G06423		-	0	0	0	0	0	0	0	0	0	0	0.69	0	0	1.5	0.04	2.47	0	0
AT1G06427		-	0	0	0	0.71	0	0.52	0.35	0.57	0.48	0	0	0.29	0.96	0	0.22	1.5	1.4	1.88
AT1G06430	FTSH8	ATP-dependent zinc metalloprotease FTSH 8, chloroplastic [Source:UniProtKB/Swiss-Prot;Acc:Q8W585]	20.83	18.24	18.66	24.48	21.51	22.95	38.23	37.32	36.09	23.95	22.37	22.19	34.1	31.99	33.5	37.26	36.5	35.11
AT1G06433		-	0	0	0	0	0	0	0	0	0	0	0	0	0	0	0	0	0	0
AT1G06437		-	0	0	0	0	0	0	0	0	0	0	0	0	0	0	0	0	1.73	0
AT1G06440		At1g06440 [Source:UniProtKB/TrEMBL;Acc:Q9SHI9]	3.63	3.61	4.17	2.61	2.63	3.25	2.4	2.44	2.08	3.08	3.33	2.93	1.46	2.61	2.13	1.61	1.6	1.72
AT1G06443		-	0	0	0	0	0	0	0	0	0	0	0	0	0	0	0	0	0	0
AT1G06447		-	0	0	0	0	0	0	0	0	0	0	0	0	0	0	0	0	0	0
AT1G06450	CAF1-1	Probable CCR4-associated factor 1 homolog 1 [Source:UniProtKB/Swiss-Prot;Acc:Q9SHJ0]	19.89	18.83	17.86	13.59	14.08	14.55	15.11	18.57	15.68	12.21	14.86	16.21	15.68	15.3	15.77	11.89	12.69	12.4
AT1G06453		-	0	0	0	0	0	0	0	0	0	0	0	0	0	0	0	0	0	0
AT1G06457		-	0	0	0	0	0	0	0	0	0	0	0	0	0	0	0	0	0	0
AT1G06460	ACD32.1	Alpha-crystallin domain 32.1 [Source:UniProtKB/TrEMBL;Acc:Q208N7]	39.64	24.59	23.62	38.05	37.06	37.65	33.84	33.58	33.01	17	18.54	18.31	18.65	17.91	21.28	21.65	25.05	19.94
AT1G06463		-	22.99	0	0	0	0	0	0	0	6.22	0	6.93	0	8.2	7.1	0	0	0	0
AT1G06467		-	4	0	0	0	0	0	0	9.17	0	0	0	0	0	0	0	0	0	0
AT1G06470		Probable sugar phosphate/phosphate translocator At1g06470 [Source:UniProtKB/Swiss-Prot;Acc:Q8H184]	19.96	20.04	22.58	22.34	22.34	22.32	19.43	17.97	19.07	19.3	21.21	20.58	21.37	20.68	18.51	21.36	20.85	19.11
AT1G06473		-	2.78	2.72	2.99	3.29	3.26	3.7	1.85	1.68	2.47	1.42	1.71	1.25	2.53	2.1	1.57	3.44	3.13	3.45
AT1G06475		Transmembrane protein [Source:UniProtKB/TrEMBL;Acc:Q6DSU2]	11.35	8.48	9.44	5.68	8.16	6.34	5.02	3.22	7.08	1.78	4.02	3.45	2.04	5.14	3.83	3.99	5.61	1.77
AT1G06480		pre-tRNA [Source:TAIR;Acc:AT1G06480]	0	0	0	0	0	0	0	0	0	0	0	0	0	0	0	0	0	0
AT1G06483		-	0	0	0	0	0	0	0	0	0	0	0	0	0	0	0	0	0	0
AT1G06487		-	0	0	0	0	0	0	0	0	0	0	0	0	0	0	0	0	0	0
AT1G06490	CALS7	Callose synthase 7 [Source:UniProtKB/Swiss-Prot;Acc:Q9SHJ3]	0.88	1.67	1.56	1	1.06	1	1.04	1.19	1.11	0.75	0.82	1.29	1.37	0.77	0.83	0.94	0.75	0.91
AT1G06493		-	0	0	0	0	0	0	0	0	0	0	0	0	0	0	0	0	0	0
AT1G06497		-	0	0	0	0	0	0	0	0	0	0	0	0	0	0	0	0	0	0
AT1G06500		AT1G06500 protein [Source:UniProtKB/TrEMBL;Acc:Q8VY54]	48.21	39.9	44.32	49.27	44.06	40.15	33.41	34.84	34.21	30.06	28.55	29.65	29.8	26.77	27.95	24.83	29.54	28.59
AT1G06507		-	0	0	0	0	0	0	0	0	0	0	0	0	0	0	0	0	0	0
AT1G06510		Forkhead-associated domain protein [Source:UniProtKB/TrEMBL;Acc:Q84K72]	6.94	5.61	6.86	8.4	7.51	8.16	10.81	13.45	10.27	10.33	10.58	9.73	10.13	7.97	9.1	10.21	9.86	9.35
AT1G06513		-	0	0	0	0	0	0	0	0	0	0	0	0	0	0	0	0	0	0
AT1G06515		Protein of unknown function (DUF3317) [Source:TAIR;Acc:AT1G06515]	44.82	36.14	36.21	64.87	64.17	58.93	58.11	48.6	55.65	53.18	62.09	53.49	55.35	57.62	50.96	59.85	66.85	58.19
AT1G06517		-	0	0	0	0	0	0	0	0	0	0	0	0	0	0	0	0	0	0
AT1G06520	GPAT1	Glycerol-3-phosphate acyltransferase 1 [Source:UniProtKB/Swiss-Prot;Acc:Q9SHJ5]	69.44	80.2	79.29	46.99	46.69	46.25	27.35	28.29	27.27	13.24	13.53	12.76	5.91	4.68	4.96	2.74	2.38	2.97
AT1G06523		-	0	0	0	0	0	0	0	0	0	0	0	0	0	0	0	0	0	0
AT1G06527		-	0	0	0	0	0	0	0	0	0	0	0	0	0	0	0	0	0	0
AT1G06530	PMD2	Peroxisomal and mitochondrial division factor 2 [Source:UniProtKB/Swiss-Prot;Acc:Q9SHJ6]	10.56	31.01	33.14	40.19	34.82	35.99	49.52	50.66	49.47	48.27	46.68	47.77	43.69	43.05	45.84	32.96	42.57	38.9
AT1G06533		-	0	0	0	0	0	0	0	0	0	0	0	0	0	0	0	0	0	0
AT1G06537		-	7.62	2.14	0	1.89	0	1.69	1.66	0	0	0	0	4.25	0	1.72	0	0	1.7	1.76
AT1G06540		F12K11.13 [Source:UniProtKB/TrEMBL;Acc:Q9SHJ7]	3.88	1.62	1.07	0.37	0.51	0.24	0.18	0.34	0	0	0.49	0	0	0	0	0	0	0
AT1G06543		-	0	0	0	0	0	0	0	0	0	0	0	0	0	0	0	0	0	0
AT1G06547		-	0	0	0	0	0	0	0	0	0	0	0	0	0	0	0	0	0	0
AT1G06550		3-hydroxyisobutyryl-CoA hydrolase-like protein 5 [Source:UniProtKB/Swiss-Prot;Acc:Q9SHJ8]	664.5	721.51	697.29	401.62	445.56	427.22	114.61	120.9	112.21	130.1	119.03	128.6	86.09	79.23	76.3	70.07	71.76	69.69
AT1G06553		-	0	0	0	0	0	0	0	0	0	0	0	0	0	0	0	0	0	0
AT1G06557		-	0	0	0	0	0	0	0	0	0	0	0	0	0	0	0	0	0	0
AT1G06560		At1g06560 [Source:UniProtKB/TrEMBL;Acc:Q84MA1]	12.64	12.23	11.5	11.45	14.52	11.43	12.38	12.37	13.18	20.34	19.09	20.85	19.84	19.29	17.87	17.2	17.87	18.4
AT1G06567		-	0.81	0.48	0	1.45	0.85	3.81	1.26	1.34	1.36	1.72	0.62	0.47	0.72	1.81	2.24	1.39	0.87	0.63
AT1G06570	HPD	4-hydroxyphenylpyruvate dioxygenase [Source:UniProtKB/Swiss-Prot;Acc:P93836]	58.15	52.24	50.55	46.42	48.29	44	36.74	43.2	37.07	32.23	31.97	32.37	31.24	34.82	32.27	36.86	31.59	36.75
AT1G06573		-	4.56	3.97	4.24	3.46	4.27	2.95	2.92	2.08	1.46	2.78	4.09	3.32	5.06	4.41	2.67	4.83	3.84	4.43
AT1G06577		-	0	0	0	1.41	0	0.65	0.62	0.91	3.01	1.47	4.66	1.56	2.98	3.76	3.32	4.16	2.61	3.2
AT1G06580		Pentatricopeptide repeat-containing protein At1g06580 [Source:UniProtKB/Swiss-Prot;Acc:Q9SHK2]	2.11	3	2.88	2.51	2.6	2.46	2.36	2.55	1.99	2.75	3.15	2.76	2.08	2.04	2.28	2.3	2.22	2.32
AT1G06583		-	0	0	0	0	0.14	0	0.13	0	0	0.27	0.33	0.25	0.26	0.22	1.27	0.13	0.61	0.33
AT1G06587		-	0	0	0	0	0.79	0	0	0	0	0	0	0	0	0	0	0	0	0
AT1G06590	APC5	Anaphase-promoting complex subunit 5 [Source:UniProtKB/Swiss-Prot;Acc:Q8H1U4]	4.68	6.91	6.93	6.73	6.97	6.96	7.82	8.03	7.76	9.5	9.2	9.76	11.08	11.06	10.82	9.7	9.98	9.59
AT1G06593		-	0	0	0	0	0	0	0	1.24	0.61	0	0	1.03	0	1.41	0	0	1.36	0
AT1G06597		-	0	0	0	0	0	0	0	0	0	0	0	0	0	0	0	0	0	0
AT1G06603		-	0	0	0	0	0	0	0	0	0	0	0	0	0	0	0	0	0	0
AT1G06607		-	0	0	0	0.09	0	0	0	0	0	0	0	0	0	0	0	0	0	0
AT1G06610		pre-tRNA [Source:TAIR;Acc:AT1G06610]	0	0	0	0	0	0	0	0	0	0	0	0	0	0	0	0	0	0
AT1G06613		-	0	0	0	0	0	0	0	0	0	0	0	0	0	0	0	0	0	0
AT1G06617		-	0	0	0	0	0	0	0	0	0	0	0	0	0	0	0	0	0	0
AT1G06620		1-aminocyclopropane-1-carboxylate oxidase homolog 1 [Source:UniProtKB/Swiss-Prot;Acc:Q84MB3]	1.24	0.81	0.91	0.3	0.28	0.39	0.07	0.18	0.03	0.11	0	0.04	0	0.03	0.04	0.04	0.07	0
AT1G06623		-	0	0	0	0	0	0	0	0	0	0	0	0	0	0	0	0	0	0
AT1G06627		-	0	0	0	0	0	0	0	0	0	0	0	0	0	0	0	0	0	0
AT1G06630		F-box/RNI-like superfamily protein [Source:UniProtKB/TrEMBL;Acc:F4IDP6]	16.34	15.86	15.4	14.31	18.33	18.41	15.82	17.12	18.22	25.54	24.88	23.23	25.46	22.66	22.77	24.65	24.56	21.74
AT1G06633		-	0	0	0	0	0	0	0	0	0	0	0	0	0.44	0	0	0	0	0
AT1G06637		-	0	0	0	0	0	0	0	0	0	0	0	0	0	0	0	0	0	0
AT1G06640		1-aminocyclopropane-1-carboxylate oxidase homolog 2 [Source:UniProtKB/Swiss-Prot;Acc:Q9C5K7]	8.8	11.24	10.38	11.04	9.83	8.65	9.27	8.54	10.92	8.05	8.41	11.68	10.72	9.59	8.77	14.95	12.28	14.46
AT1G06643		-	0	0	0	0	0	0	0	0	1.75	0	0	0	0	0	0	0	0	0
AT1G06645		2-oxoglutarate (2OG) and Fe(II)-dependent oxygenase superfamily protein [Source:TAIR;Acc:AT1G06645]	0.06	0	0.03	0.08	0.16	0.04	0.07	0	0.03	0	0.13	0	0.04	0.06	0.11	0.04	0.07	0.13
AT1G06647		-	0	0	0	0	0	0	0	0	0	0	0	0	0	0	0	0	0	0
AT1G06650		1-aminocyclopropane-1-carboxylate oxidase homolog 3 [Source:UniProtKB/Swiss-Prot;Acc:Q8H1S4]	3.29	3.77	3.4	4.16	3.36	4.15	3.3	3.48	3.13	1.34	1.46	1.07	2.53	1.14	1.46	1.87	1.15	1.42
AT1G06653		-	0	0	0	0	0	0	0	0	0	0	0	0	0	0	0	0	0	0
AT1G06657		-	0	0	0	0	0	0	0	0	0	0	0	0	0	0	0	0	0	0
AT1G06660	JASON	Protein JASON [Source:UniProtKB/Swiss-Prot;Acc:F4IDQ5]	7.56	9.1	9.95	21.16	23.19	19.88	19.59	21.19	18.92	45.84	47.3	46.88	49.52	49.83	50.84	43.58	43.33	43.55
AT1G06663		-	0	0	0	0	0	0	0	0	0	0	0	0	0	0	0	0	0	0
AT1G06667		-	0	0	0	0	0	0	0	0	0	0	0	0	0	0	0	0	0	0
AT1G06670	NIH	DExH-box ATP-dependent RNA helicase DExH2 [Source:UniProtKB/Swiss-Prot;Acc:F4IDQ6]	8.67	16.32	16.49	15.09	16.65	17.97	18.73	20.36	19.72	23.35	24.09	26.38	26.49	27.98	26.87	23.92	24.05	24.11
AT1G06673		-	0	0	0	0	0	0	0	0	0	0	0	0	0	0	0	0	0	0
AT1G06677		-	0	0	0	0	0	0	0	0	0	0	0	0	0	0	0	0	0	0
AT1G06680	PSBP1	Oxygen-evolving enhancer protein 2-1, chloroplastic [Source:UniProtKB/Swiss-Prot;Acc:Q42029]	239.83	184	176.94	271.33	255.78	253.61	508.73	501.18	496.2	61.95	64.47	58.52	92.63	87.86	88.04	76.04	79.99	79.25
AT1G06683		-	0	0	0	0	0	0	0	0	0	0	0	0	0	0	1.57	0	1.57	0
AT1G06687		-	0.23	0.54	0.25	0.27	1.2	0.25	0.24	0.31	0.22	1.66	2.33	1.34	0.81	1.36	3.02	1.3	2.7	0.95
AT1G06690		Uncharacterized oxidoreductase At1g06690, chloroplastic [Source:UniProtKB/Swiss-Prot;Acc:Q94A68]	17.01	14.44	12.36	20.2	21.74	20.68	15.15	15.58	15.59	8.63	9.27	9.24	9.9	10.38	9.62	9.07	8.56	9.05
AT1G06693		-	0	0	0	0	0	0	0	0	0	0	0	0	0	0	0	0	0	0
AT1G06697		-	0	0	0	0	0	0	0	0	0	0	0	0	0	0	0	0	0	0
AT1G06700	PTI11	PTI1-like tyrosine-protein kinase 1 [Source:UniProtKB/Swiss-Prot;Acc:Q8H1G6]	30.47	28.02	30.07	32.4	36.47	33.21	36.21	37.85	37.34	38.19	39.52	38.1	43.53	41.6	41.33	47.2	48.79	49.39
AT1G06703		-	0	0	0	0	0	0	0	0	0	0	0	0	0	0	0	0	0	0
AT1G06707		-	0	0	0	0	0	0	0	0	0	0	0	0	0	0	0	0	0	0
AT1G06710		Tetratricopeptide repeat (TPR)-like superfamily protein [Source:TAIR;Acc:AT1G06710]	1.72	3.26	3.15	2.27	2.77	2.59	2.22	2.29	2.2	3.55	3.87	3.68	2.75	3.02	2.64	2.52	2.43	2.39
AT1G06713		-	0	0	0	0	0	0	0	1.28	0	0	0	0	0	0	0	0	0	0
AT1G06717		-	0	0.58	2.16	0.56	0.51	1.03	0.49	0	0.46	1.16	0.49	0	0.57	0.48	0	1.09	1.51	0.5
AT1G06720		P-loop containing nucleoside triphosphate hydrolases superfamily protein [Source:TAIR;Acc:AT1G06720]	7.32	14.94	15.32	15.86	17.78	17.81	16.01	16.02	16.5	22.05	23.17	24.52	19.01	18.22	17.9	14.01	14.55	14.39
AT1G06723		-	0	0	0	0	0	0	0	0	0	0	0	0	0	0	0	0	0	0
AT1G06727		-	0	0	4.81	0	9.53	3.83	7.86	0	3.84	25.48	4.24	5.36	14.9	21.54	15.63	13.69	4.03	12.8
AT1G06730		At1g06730/F4H5_22 [Source:UniProtKB/TrEMBL;Acc:Q9ASV2]	11.69	14.41	14.89	14.46	14.52	14.45	14.95	13.16	14.75	15.66	15.98	16.18	14.38	15.27	15.63	14.64	14.34	13.96
AT1G06733		-	0	0	0	0	0	0	0	0	4.44	5.92	0	0	0	10	8.95	5.27	13.93	4.92
AT1G06737		-	0.08	0.21	0.15	0.32	0.92	0.83	0.37	0.68	0.98	2.3	2.25	1.62	3.65	4.53	3.79	3.29	3.37	3.69
AT1G06740		At1g06740 [Source:UniProtKB/TrEMBL;Acc:Q9M9Y2]	2.36	4.06	4.98	4.6	5.51	4.62	5.78	6.68	7.01	6.53	5.64	6.46	4.23	4.83	5.06	4.5	4.17	4.04
AT1G06743		-	0	0	0	0	0	0	0	0	0	0	0	0	0	0	0	0	0	0
AT1G06747		-	5.44	2.47	2.12	1.29	0.71	1.87	0	0	0	0	0	0	0	0	0	0	0	0
AT1G06750		p-loop containing nucleoside triphosphate hydrolases superfamily protein [Source:UniProtKB/TrEMBL;Acc:F4IDR5]	0.92	1.31	1.14	0.87	1.19	1.54	1.36	1.76	1.2	0.57	0.58	0.59	0.65	0.8	0.79	0.73	0.83	0.69
AT1G06753		-	0	3.26	2.74	0	0.52	1.09	1.28	0.34	1.67	1.5	0	0.88	1.47	1.72	2.73	1.7	0.8	0.77
AT1G06757		-	0.49	0.94	0	0	1.35	0.55	1.67	1.05	2.8	0.73	0.66	0	0	2.24	0.91	2.01	0.89	2.89
AT1G06760		Histone H1.1 [Source:UniProtKB/Swiss-Prot;Acc:P26568]	291.58	240.02	228.06	265.13	240.24	246.65	226.27	228.62	214.65	261.4	269.88	275.58	252.93	247.86	261.72	252.51	252.39	256.06
AT1G06770	DRIP1	E3 ubiquitin protein ligase DRIP1 [Source:UniProtKB/Swiss-Prot;Acc:Q9M9Y4]	4.01	5.56	6.25	5.39	6.08	5.67	6.95	7.5	7.1	7.39	8.41	8.27	7.99	8.2	7.27	7.4	6.33	6.59
AT1G06773		-	0	0	0	0	0	0	1.76	0	0	0	0	0	0	0	3.58	0	7.2	0
AT1G06777		-	0	0	0	0	0	0	0	0	0	0	0	0	0	0	0	0	0	0
AT1G06780	GAUT6	Hexosyltransferase [Source:UniProtKB/TrEMBL;Acc:F4IDS0]	15.21	16.71	18.37	14.27	15.96	16.54	15.64	18.83	17.76	20.72	23.52	23.32	21.99	20.74	21.81	19.71	19.76	19.48
AT1G06783		-	0	0	0	0	0	0	0	0	0	0	0	0	0	0	0	0	0	0
AT1G06787		-	0	0.04	0	0	0	1.22	0	0	1.64	0	3.7	0.88	0.07	0	0	3.49	6.11	1.75
AT1G06790		F4H5.12 protein [Source:UniProtKB/TrEMBL;Acc:Q9M9Y6]	27.82	20.51	18.53	26.67	24.23	23.41	26.71	26.25	24.95	28.21	26.35	26.14	22.9	23.15	21.04	21.2	21.12	20.44
AT1G06797		-	0	0	0	0	0	0	0	0	0	0	0	0	0	0	0	0	0	0
AT1G06800	PLA-I{gamma}1	PLA-I(gamma)1 [Source:UniProtKB/TrEMBL;Acc:A0A178WG46]	6.07	5.96	5.72	4.49	5.49	5.92	4.95	5.37	5.21	4.41	4.74	3.79	4.72	4.3	4.12	5.52	4.42	3.69
AT1G06810		Endonuclease/glycosyl hydrolase [Source:UniProtKB/TrEMBL;Acc:Q58G55]	0.66	0.25	0.82	0.39	1.35	0.6	0.79	0.67	1.04	1.57	1.54	2.61	1.03	0.96	1.94	0.62	0.83	0.78
AT1G06817		-	1.96	0.85	0	1.6	0	0.73	0	0	0	0	0	0	0	0	0	0	0	0
AT1G06820	CRTISO	Prolycopene isomerase, chloroplastic [Source:UniProtKB/Swiss-Prot;Acc:Q9M9Y8]	15.35	18.31	18.43	14.92	14.81	15.72	13.86	14.9	14.89	17.69	16.83	17.42	16.79	14.67	15.07	15.91	15.44	16.13
AT1G06823		-	0	0	0	0	0	0	0.21	0	0	0	0	0	0	0	0	0	0	0
AT1G06827		-	0.18	0	0	0	0	0.81	0.76	0	0.18	1.33	0.75	0.21	0	0.73	0.41	0.63	0.4	1.33
AT1G06830	GRXS11	Monothiol glutaredoxin-S11 [Source:UniProtKB/Swiss-Prot;Acc:Q9M9Y9]	0	0	0	0	0	0	0	0	0	0	0	0	0	0	0.15	0	0	0
AT1G06837		-	0	0	0	0.29	0	0	0.25	0.15	0	0.44	0	0.42	0.72	0.84	0.27	0.14	0.13	0
AT1G06840		Probable LRR receptor-like serine/threonine-protein kinase At1g06840 [Source:UniProtKB/Swiss-Prot;Acc:C0LGD7]	5.18	6.42	7.05	4.46	5.04	4.9	4.48	4.58	4.78	6.33	6.29	7.11	6.96	7.62	6.49	6.99	6.41	7.14
AT1G06850	AtbZIP52	AtbZIP transcription factor [Source:UniProtKB/TrEMBL;Acc:Q8VWG0]	3.68	4.45	4.4	3.8	4.71	3.99	4.28	4.02	5.3	3.99	5.8	5.92	6.35	6.44	5.77	6.07	6.69	6.78
AT1G06853		-	0	0	0	0	0	0	0	0	0	0	0	0	0	0	0	0	0	0
AT1G06857		-	0	0	0	0	0	0	0	0	0	0	5.19	0	0	0	0	1.89	0	0
AT1G06860		pre-tRNA [Source:TAIR;Acc:AT1G06860]	0	0	0	0	0	0	0	0	0	0	0	0	0	0	0	0	0	0
AT1G06863		-	0	0	0	0	0	0	0	1.35	0	0	0	0	0	0	0	0.53	0	0
AT1G06867		-	1.22	0	1.9	0	0.45	0.91	0.43	1.21	0	1.02	0	0	0	0.42	0	0.48	0.45	0
AT1G06870	TPP2	Probable thylakoidal processing peptidase 2, chloroplastic [Source:UniProtKB/Swiss-Prot;Acc:Q9M9Z2]	16.72	18.47	18.95	18.87	17.2	18.42	13.37	14.12	13.67	23.52	22.44	23.75	16.76	19	17.91	15.88	17.17	16.03
AT1G06873		-	0	0	0	0	0	0	0	0	0	0	0	0	0	0	0	0	0	0
AT1G06877		-	0	0	0	0	0	0	0	0	0	0	0	0	0	0	0	0	0	0
AT1G06880		pre-tRNA [Source:TAIR;Acc:AT1G06880]	0	0	0	0	0	0	0	0	0	0	0	0	0	0	0	0	0	0
AT1G06883		-	0	0	0	0.25	0.1	0.17	0.21	0.78	0.88	0	0	0	0.06	0.05	0.17	0.06	0.11	0.15
AT1G06890	UXT3	UDP-xylose transporter 3 [Source:UniProtKB/Swiss-Prot;Acc:Q8RXL8]	52.45	48.84	46.9	47.91	52.9	52.07	56.87	58.06	58.46	68.08	63.15	67.05	66.16	70.81	70.13	69.95	67.39	72.81
AT1G06897		-	0	0	0	0	0	0	0	0	0	0	0	0	0	0	0	0	0	0
AT1G06900		Nardilysin-like [Source:UniProtKB/Swiss-Prot;Acc:F4HNU6]	11.77	18.15	19.29	14.07	15.48	16.44	18.86	21.46	20.31	27.95	30.27	28.37	29.84	31.33	30.54	28.4	26.22	27.59
AT1G06903		-	0	0	0	0	0	0	0	0	0	0	0	0	0	0	0	0	11.46	0
AT1G06907		-	0	0.22	0.2	0	0	0	0	0	0	0	0	0	0	0	0	0	0	0
AT1G06910	TRFL7	TRFL7 [Source:UniProtKB/TrEMBL;Acc:A0A178W486]	4.83	6.4	5.75	6.87	5.3	6.79	7.53	7.19	7.15	7.65	8.26	7.7	9.27	7.16	9.56	6.94	7.15	8.35
AT1G06913		-	0	0	0	0	0	0	0	0	0	0	0	0	0	0	0	0	0	0
AT1G06917		-	0	0	0	0	0	0	1.26	0	0	0	0	0.99	0	0.41	0	0	0	0.86
AT1G06920	OFP4	Transcription repressor OFP4 [Source:UniProtKB/Swiss-Prot;Acc:F4HNU8]	0.17	0.23	0.04	0.2	0.08	0.09	0.04	0.09	0.19	0.15	0.2	0.14	0	0	0.05	0.14	0	0.04
AT1G06923		Transcription repressor OFP17-like protein [Source:UniProtKB/TrEMBL;Acc:Q1G3W7]	0	0	0	0	0	0	0	0	0	0	0	0	0	0	0	0.08	0	0
AT1G06925		FUNCTIONS IN: molecular_function unknown; INVOLVED IN: biological_process unknown; LOCATED IN: endomembrane system; BEST Arabidopsis thaliana protein match is: Putative endonuclease or glycosyl hydrolase (TAIR:AT4G20480.1); Ha. [Source:TAIR;Acc:AT1G06925]	0.68	0	0	0	0	0	0	0	0	0	0	0	0	0	0	0	0	0
AT1G06927		-	0	0	0	0	0	0	0	0.3	0	0.27	0	0	0	0	0	0	0	0
AT1G06930		Expressed protein [Source:UniProtKB/TrEMBL;Acc:Q5BQ22]	0	0	0	0	0.1	0.06	0	0.06	0.1	0	0	0	0	0	0	0	0.05	0
AT1G06933		-	0	0	0	0	0	0	0	0	0	0	0	0	0	0	0	0	0	0
AT1G06937		-	0	0	0	0	0	0	0	0	0	0	0	0	0	0	0	0	0	0
AT1G06943		-	0	0	0	0	0	0	0	0	0	0	0	0	0	1.35	0	2.3	0	0.71
AT1G06947		-	0	0	0	0	0	0	0	0	0	0	0	0	0	0	0	0	0	0
AT1G06950	TIC110	Protein TIC110, chloroplastic [Source:UniProtKB/Swiss-Prot;Acc:Q8LPR9]	27.95	43.25	43.13	39.32	43.51	41.79	59.65	67.75	67.28	53.59	53.44	56.7	49.33	52.4	52.65	41.99	44.78	42.33
AT1G06953		-	0	0	0	0	0	0	0	0	0	0	0	0	0	0	0	0	0	0
AT1G06957		-	0	0	0	0	0	0	0	0	0	0	0	0	0	0	0	0	0	0
AT1G06960		U2 small nuclear ribonucleoprotein B'' 2 [Source:UniProtKB/Swiss-Prot;Acc:Q8H1S6]	35.43	29.86	33.24	44.8	39.46	36.06	31.62	31.09	31.05	18	17.86	19.57	17.91	15.77	15.14	16.28	15.21	15.65
AT1G06963		-	0	0	0	0	0	0	0	0	0	0	0	0	0	0	0	0	0	0
AT1G06967		-	0	0	0	0	0	0	0	0	0	0	0	0	0	0	0	0	0	0
AT1G06970	CHX14	CHX14 [Source:UniProtKB/TrEMBL;Acc:A0A178WC73]	0.08	0.14	0	0	0.14	0.1	0.03	0.05	0.13	0.07	0.13	0.12	0.09	0.09	0.05	0.1	0.13	0.13
AT1G06973		-	0	0	0	0	0	0	0	0	0	0	0	0	0	0	0	0	0	0
AT1G06977		-	1.61	2.43	3.86	4.64	3.02	3.27	3.54	2.17	2.38	1.91	1.44	1.54	1.96	2.07	1.85	2.66	1.64	1.76
AT1G06980		6,7-dimethyl-8-ribityllumazine synthase [Source:UniProtKB/TrEMBL;Acc:Q9LMJ2]	0.1	0.4	0.11	0.61	0.31	0.45	0.16	0.88	0.67	0	0.05	0	0.12	0.1	0.06	0.11	0.16	0.36
AT1G06983		-	0	0	0	0	0	0	0	0	0	0	0	0	0	0	0	0	0	0
AT1G06987		-	0	0	0.47	0	0.89	0	0	0	0	1.01	0	0.5	0.99	0.83	0.45	3.81	1.77	2.62
AT1G06990		GDSL esterase/lipase At1g06990 [Source:UniProtKB/Swiss-Prot;Acc:Q9LMJ3]	0	0	0	0	0	0	0	0	0	0	0	0	0	0	0	0	0	0
AT1G06993		-	0	0	0	0	0	0	0	0	0	0	0.7	0	0	1.36	0	0	0	0
AT1G06997		-	0	0	0	0	0	0	0	0	0	0	0	0	0	0	0	0	0	0.11
AT1G07000	ATEXO70B2	Exocyst subunit Exo70 family protein [Source:UniProtKB/TrEMBL;Acc:A0A178WCB5]	1.49	1.74	1.72	1.41	1.12	1.1	1.17	1.46	1.26	2.8	2.76	2.55	1.72	1.76	1.48	1.1	1.5	1.27
AT1G07003		-	0	0	0	0	0	0	0	0	0	0	0	0	0	0	0	0	0	0
AT1G07007		-	0.03	0.03	0.05	0.73	0.96	1.45	3.13	3.29	2.64	3.48	2.58	3.38	4.93	5.22	4.46	6.34	6.79	7.11
AT1G07010		Calcineurin-like metallo-phosphoesterase superfamily protein [Source:UniProtKB/TrEMBL;Acc:F4HNW0]	13.09	11.94	14.5	11.54	13.95	13.26	17.08	20.78	18.96	10.27	9.93	10.35	11.4	11.61	12.79	11.63	10.36	10.99
AT1G07013		-	0	0	0	0	0	0	0	0	0	0	0	0	0	0	0	0	0	0
AT1G07017		-	0	0	0	0	0	0	0	0	0	0	0	0	0	0	0	0	0.27	0
AT1G07020		Uncharacterized protein At1g07020 [Source:UniProtKB/TrEMBL;Acc:Q8LCS6]	44.45	27.47	28.5	33.79	30.66	30.9	22.5	21.77	21.59	31.84	30.87	30.03	26.58	25.74	24.6	31.38	24.91	31.33
AT1G07023		-	0	0	0	0	0	0.35	0	0	0	0	0	0	0	0	0.69	0	1.01	0
AT1G07025		Mitochondrial substrate carrier family protein [Source:UniProtKB/TrEMBL;Acc:F4HNW4]	0	0	0	0	0	0	0	0	0	0	0	0.19	0.19	0	0	0	0	0
AT1G07027		-	0	0	0.69	0.71	0	1.3	0.62	0.91	1.75	0	0.63	1.49	0.72	0.61	1.3	0	1.27	0
AT1G07030		At1g07030 [Source:UniProtKB/TrEMBL;Acc:Q8L6Z2]	20.05	20.96	17.48	22.97	22.04	19.86	24.44	22.31	23.52	26.49	27.27	26.93	26.6	26.37	27.62	27	27.02	28.07
AT1G07040		At1g07040 [Source:UniProtKB/TrEMBL;Acc:Q9LMJ7]	37.88	35.76	32.54	41.05	40.56	40.35	52.22	56.78	54.3	48.1	49	50.53	61.68	64.03	61.22	86.76	82.48	81.93
AT1G07050		CCT motif family protein [Source:TAIR;Acc:AT1G07050]	1.33	1.87	1.96	2.69	1.86	1.92	1.5	0.98	0.95	0.79	1.03	0.58	0.39	0.65	1.18	0.66	0.79	0.54
AT1G07051	MIR847A	MIR847a; miRNA [Source:TAIR;Acc:AT1G07051]	0	0	0	0	0	0	0	0	0	0	0	0	0	0	0	0	0	0
AT1G07060		F10K1.23 [Source:UniProtKB/TrEMBL;Acc:Q9LMJ9]	0.82	1.35	0.82	1.08	0.54	1.46	0.38	0.26	0.89	1.17	1.73	1.58	1.12	1.54	1.42	1.19	1.66	0.83
AT1G07070	RPL35AA	60S ribosomal protein L35a-1 [Source:UniProtKB/Swiss-Prot;Acc:Q9LMK0]	77.68	65.24	59.36	92.48	84.33	79.93	44.81	47.82	57.91	65.44	67.09	58.18	55.51	50.76	50.73	36.97	43.37	41.39
AT1G07080		At1g07080/F10K1_15 [Source:UniProtKB/TrEMBL;Acc:Q93VQ6]	257.98	223.9	212.1	279.4	278.7	273.15	282.99	273.86	278.5	269.33	274.29	272.51	233.59	241.27	245.99	234.89	250.39	258.84
AT1G07090	LSH6	LSH6 [Source:UniProtKB/TrEMBL;Acc:A0A178WE41]	202.79	163.81	155.37	149.33	144.06	140.13	146.33	149.42	133.94	155.71	164.46	164.43	107.23	105.54	106.58	84.57	81.52	82.86
AT1G07100		pre-tRNA [Source:TAIR;Acc:AT1G07100]	0	0	0	0	0	0	0	0	0	0	0	0	0	0	0	0	0	0
AT1G07110	FKFBP	FKFBP [Source:UniProtKB/TrEMBL;Acc:A0A178W4F2]	14.17	17.53	17.75	18.05	20.04	19.79	22.61	25.66	22.53	23.91	24.62	24.87	27.38	28.92	28.19	31.45	29.48	29.71
AT1G07117		-	0	0	0	0	0	0	0	0	0.45	0	0	0	0	0	0	0	0	0
AT1G07119		other RNA [Source:TAIR;Acc:AT1G07119]	6.36	6.39	7.87	6.92	6.63	6.43	5.05	4.33	5.82	7.43	6.93	6.42	6.78	5.46	5.57	6.56	5.45	5.6
AT1G07120		CHUP1-like protein [Source:UniProtKB/TrEMBL;Acc:Q9LMK4]	0.35	0.31	0.97	0.71	0.44	0.96	1.24	0.85	0.79	1.72	2.21	2.05	2.77	2.7	2.82	2.33	3.04	2.14
AT1G07123		-	0	0	0	0	0	0	0	0	0	0	0	0	0	0	0	0	0	0
AT1G07127		-	0	0	0	0	0	0	0	0	0	0	0	0	0	0	0	0	0	0
AT1G07128		Potential natural antisense gene, locus overlaps with AT1G07130 [Source:TAIR;Acc:AT1G07128]	1.49	2.83	0.77	2.13	2.17	1.72	1.53	1.76	1.46	2.38	1.39	0.59	0.82	1.86	1.66	2	2.55	2.72
AT1G07130	STN1	CST complex subunit STN1 [Source:UniProtKB/Swiss-Prot;Acc:Q9LMK5]	12.08	11.02	11.32	11.21	9.17	12.23	7.02	7.98	6.2	8.46	13.86	10.99	11.27	11.37	9.51	8.31	8.07	11.81
AT1G07133		-	0	0	0	0	0	0	0	0	0	0	0	0	0	0	0	0	0	0
AT1G07135		At1g07135 [Source:UniProtKB/TrEMBL;Acc:Q9LMK6]	178.31	142.03	140.09	105.57	108	109.99	55.18	42.54	56.86	49.34	45.14	39.26	66.9	64.23	78.31	52.85	54.85	51.57
AT1G07137		-	0	0	0	0	0	0	0	0	0	0	0	0	0	0	0	0	0	0
AT1G07140	RANBP1A	Ran-binding protein 1 homolog a [Source:UniProtKB/Swiss-Prot;Acc:Q9LMK7]	104.92	132.65	129.65	139.56	129.09	131.15	121.93	117.31	111.95	197.05	193.55	191.35	172.8	170.29	175.77	170.4	165.55	158.8
AT1G07143		-	2.77	2.08	2.94	2.91	4.77	3.27	1.1	1.42	1.41	1.27	1.28	1.56	1.62	1.34	1.17	1.2	2.17	1.29
AT1G07147		-	0	0	0	0	0	0	0	0	0	0	0	0	0	0	0	0	0	0
AT1G07150	MAPKKK13	F10K1.14 protein [Source:UniProtKB/TrEMBL;Acc:Q9LMK8]	1.24	1.22	1.06	1.69	1.04	1.34	1.76	2.25	2.05	1.58	1.56	1.62	2.4	2.95	2.31	1.61	2.21	2.44
AT1G07157		-	0	0	0	0	0	0	0	0	0	0	0	0	0	0	0	0	0	0
AT1G07160		PP2C-type phosphatase AP2C2 [Source:UniProtKB/TrEMBL;Acc:F6LPR6]	0.03	0	0	0.11	0.16	0.2	0.1	0	0.09	0	0.06	0.03	0.07	0	0.03	0.07	0.1	0.12
AT1G07163		-	0	0	0	0	0	0	0	0	0	0	0	0	0	0	0	0	0	0
AT1G07167		-	4.42	3.62	4.47	2.51	1.16	2.13	0.18	1.05	0.42	1.05	0.88	1.09	0.51	0.43	0.39	0.1	0.09	0.27
AT1G07170		PHD finger-like domain-containing protein 5A [Source:UniProtKB/Swiss-Prot;Acc:P0DI19]	26.02	25.09	23.59	23.45	28.97	26.56	21.73	19.56	24.24	24.67	33.03	26.34	21.77	20.31	18.48	24.49	19.79	21.11
AT1G07173		-	4.27	0	3.32	0.9	2.48	0	0	0	0	0	0	0	0	0	0	0	0	0
AT1G07175		unknown protein; FUNCTIONS IN: molecular_function unknown; INVOLVED IN: biological_process unknown; LOCATED IN: endomembrane system; BEST Arabidopsis thaliana protein match is: unknown protein (TAIR:AT2G29995.1); Ha. [Source:TAIR;Acc:AT1G07175]	0	0	0	0	0	0	0.7	0.73	0.84	0	0.17	0.2	0.2	0	0.19	0.38	0.36	0.35
AT1G07177		-	0	0	0	0	0	0	0	0	0	0	0	0	0	0	0	0	0	0
AT1G07180	NDA1	Internal alternative NAD(P)H-ubiquinone oxidoreductase A1, mitochondrial [Source:UniProtKB/Swiss-Prot;Acc:Q8GWA1]	1.35	1.02	1.08	0.97	1.23	1.37	0.85	0.66	1.04	2.26	2.36	2.37	1.79	1.96	1.65	1.16	1.27	1.34
AT1G07183		-	0	0	0.73	0	0.7	0	0	0.96	0	1.55	0	0.78	0.76	0	0	0	0.67	0
AT1G07187		-	0.54	0.72	1.23	0.43	0.18	1.28	0.74	1.4	1.1	2.03	1.34	2.31	1.15	1.04	1.39	0.91	1.44	0.99
AT1G07190		BEST Arabidopsis thaliana protein match is: lon protease 1 (TAIR:AT5G26860.1); Ha. [Source:TAIR;Acc:AT1G07190]	0	0	0	0	0	0	0	0	0	0	0	0	0	0	0	0	0	0
AT1G07193		-	0	0	0	0	0	0	0	0	0	0	0	0	0	0	0	0	0	0
AT1G07197		-	0	0	0	0	0	0	0	0	0	0	0	0	0	0	0	0	0	0
AT1G07200	SMXL6	Protein SMAX1-LIKE 6 [Source:UniProtKB/Swiss-Prot;Acc:Q9LML2]	8.23	9.48	11.21	6.5	7.23	7.03	8.24	9.65	8.48	7.59	7.83	8.04	5.95	6.07	7.15	6.36	5.68	5.44
AT1G07210		F10K1.8 protein [Source:UniProtKB/TrEMBL;Acc:Q9LML3]	51.08	43.91	46.35	48.46	50.64	47.29	45.65	43.31	42.66	67.81	63.92	63.24	52.39	58.36	50.6	51.59	51.64	51.04
AT1G07220		F10K1.7 protein [Source:UniProtKB/TrEMBL;Acc:Q9LML4]	4.74	5.58	6.27	3.57	4.2	3.73	3.58	3.68	3.13	3.01	2.39	3.7	3.13	2.32	2.33	2.5	2.11	2.53
AT1G07230	NPC1	Non-specific phospholipase C1 [Source:UniProtKB/Swiss-Prot;Acc:Q8L7Y9]	34.07	35.79	37.23	36.61	34.09	36.03	39.28	40.68	41.15	45.29	49.34	46.65	38.15	42.24	38.16	41.46	42.99	41.33
AT1G07233		-	0	0	0	0	0	0	0	0	0	0	0	0	0	0	0	0	0	0
AT1G07237		-	0	0	0	0	0	0	0	0	0	0	0	0	0	0	0	0	0	0
AT1G07240	UGT71C5	UDP-glycosyltransferase 71C5 [Source:UniProtKB/Swiss-Prot;Acc:Q9FE68]	2.35	1.3	1.63	3.63	2.83	2.6	2.91	2.79	2.32	3.52	3.01	2.95	3.94	2.88	3.16	2.67	2.67	2.71
AT1G07243		-	0	0	0	0	0	0	0	0	0	0	0	0	0	0	0	0	0	0
AT1G07247		-	0	0	0	0	0	0	0	0	0	0	0	0	0	0	0	0	0	0
AT1G07250	UGT71C4	Flavonol 3-O-glucosyltransferase UGT71C4 [Source:UniProtKB/Swiss-Prot;Acc:Q9LML6]	35.25	29.81	30.12	24.84	22.69	23.43	27.44	26.78	25.16	39.18	38.71	37.84	25.65	25.28	28.27	25.97	27.39	26
AT1G07253		-	0	0	0	0	0	0	0	0	0	0	0	0	0	0	0	0	0	0
AT1G07257		-	0	0	0	0	0	0	0	0	0	0	0	0	0	0	0	0	0	0
AT1G07260	UGT71C3	UDP-glycosyltransferase 71C3 [Source:UniProtKB/Swiss-Prot;Acc:Q9LML7]	6.91	5.24	5.95	5.31	4.89	5.62	7.08	6.03	6.23	3.12	2.97	3.48	4.11	4.49	4.58	5.3	4.7	4.53
AT1G07263		-	0	0	0	0	0	0	0	0	0	0	0	0	0	0	0	0	0	0
AT1G07267		-	0	0	0	0	0.28	0	0	0.37	0	4.21	0.55	0.32	0.32	0.53	0.29	0.61	0.29	0.56
AT1G07270	CDC6B	Cell division control protein 6 homolog B [Source:UniProtKB/Swiss-Prot;Acc:Q8W032]	2.33	2.38	2.9	2.9	3.16	3.17	1.95	2.83	1.84	3.56	3.99	4.59	3.85	4.48	4.55	3.57	3.3	3.7
AT1G07273		-	0	0.11	0.08	0.09	0.22	0.19	0.05	0.38	0.3	0.5	0.62	0.51	0.68	1.24	0.72	0.63	1.46	1.13
AT1G07277		-	0	0	0	0	0	0	0	0	0	0	0	0	0	0	0	0	0	0
AT1G07280		At1g07280/F22G5_32 [Source:UniProtKB/TrEMBL;Acc:Q8VZC8]	31.75	25.63	25.83	33.92	32.4	34.01	67.47	66	67.73	67.09	66.35	68.54	64.36	61.65	61.59	68.35	65.9	69.08
AT1G07283		-	0	0	0	0	0	0	0	0	0	0	0	0	0	0	0	0	0	0
AT1G07287		-	0	0	0	0	0	0	0	0	0	0	0	0	0	0	0	0	0	0
AT1G07290	GONST2	golgi nucleotide sugar transporter 2 [Source:TAIR;Acc:AT1G07290]	1.63	2.81	2.07	3.92	3.33	3.58	2.66	3.33	3.02	3.81	4.3	3.97	5.58	5.41	5.23	7.22	6.62	6.32
AT1G07293		-	0	0	0	0	0	0	0	0	1.69	0	0	0	0	0	0	0	0	0
AT1G07297		-	0.5	0.29	1.3	0.3	0.26	1.38	0	0.16	0	0	1.85	0	0	0	0	0	0	0.13
AT1G07300		josephin protein-related [Source:TAIR;Acc:AT1G07300]	15.99	12.37	11.18	15.15	14.47	14.1	11.29	10.8	10.86	13.75	13.99	12.6	9.48	10.9	10.99	12.92	11.88	13.08
AT1G07303		-	0	6.13	0	5.24	0	0	0	0	0	5.92	0	0	0	0	0	0	0	0
AT1G07310		Calcium-dependent lipid-binding (CaLB domain) family protein [Source:UniProtKB/TrEMBL;Acc:Q9LNV0]	34.38	37.04	33.63	31.06	32.61	34.13	40.09	42.09	37.05	36.45	33.82	36.18	37.56	40.34	38.79	35.94	38.19	40.9
AT1G07313		-	0	0	0	0	0	0	0	0	0	0	0	0	0	0	0	0	0	0
AT1G07317		-	0	0	0	0	0	0	0	0	0	0	0	0	0	0	0	0	0	0
AT1G07320	RPL4	RPL4 [Source:UniProtKB/TrEMBL;Acc:A0A384KN11]	78.95	75.06	76.44	95.21	88.37	86.47	126.23	127.42	126.75	50.1	52.54	55.1	49.29	54.37	53.33	46.68	46.67	51.09
AT1G07323		-	20.75	26.14	31.48	36.77	43.31	38.33	50.15	51.8	47.97	31.81	32.53	33.59	27.97	35.49	29.79	27.55	26.12	36.43
AT1G07327		-	0	0	0	1.77	0	0	0	0	0.73	0	0	0	0	0.77	0	0.87	0	0
AT1G07330		Dentin sialophosphoprotein [Source:UniProtKB/TrEMBL;Acc:Q9LNV2]	0.1	0.02	0	0.09	0.09	0.04	0.04	0.06	0.12	0.02	0	0.17	0.04	0.11	0.04	0.15	0.16	0.06
AT1G07333		-	0	0.51	0.95	0	0	0.46	1.29	0.61	0.81	0.51	0.43	0.51	0	0.42	0.46	0.96	0	0
AT1G07337		-	0	0	0	0	0	0	0.16	0.17	0.13	0.32	0	0	0	0	0	0	0	0
AT1G07340	STP2	STP2 [Source:UniProtKB/TrEMBL;Acc:A0A178W5X1]	0	0.03	0	0	0.11	0.03	0	0	0	0.16	0.06	0.09	0.06	0.19	0.34	0.19	0.18	0.08
AT1G07343		-	0	0	0	1.63	0	0	4.03	0	0	0	0	1.81	0	0	0	0	0	0
AT1G07347		-	0	0	0	0	0	0	0	0	0	0	0	0	0	0	0	0	0	0
AT1G07350	SR45A	Serine/arginine-rich splicing factor SR45a [Source:UniProtKB/Swiss-Prot;Acc:Q84TH4]	34.65	34.42	31.39	48.51	50.78	44.36	21.48	22.05	22.4	72.74	76.16	75.9	57.74	54.71	56.39	86.79	90.09	92.69
AT1G07353		-	0	0	0	0	0	0	0	0	0	0	0	0	0	0	0	0	0	0
AT1G07357		-	0	0	0	0	0	0	0	0	0	0	0	0	0	0	0	0	0	0
AT1G07360		Zinc finger CCCH domain-containing protein 4 [Source:UniProtKB/Swiss-Prot;Acc:Q9LNV5]	41.94	44.05	45.19	46.88	48.05	44.58	51.94	53.52	54.33	56.53	63.15	61.51	60.25	62.62	61.17	56.92	55.83	58.31
AT1G07367		-	0	0	0	0	0	0	0	0	0	0	0	0	0	0	0	0	0	0
AT1G07370	PCNA	Proliferating cellular nuclear antigen 1 [Source:UniProtKB/Swiss-Prot;Acc:Q9M7Q7]	61.56	54.99	53.91	71.8	69.2	69.74	56.52	58.52	53.94	65.75	64.37	66.77	58.03	58.52	59.42	52.83	52.36	50.93
AT1G07373		-	0	0	0	0.12	0.1	0.44	0	0.12	0	0.24	0	0	0	0	0.22	0	0.11	0.41
AT1G07380		Neutral/alkaline non-lysosomal ceramidase [Source:TAIR;Acc:AT1G07380]	4.61	4.62	5.07	7.84	6.75	7.75	10.28	12.48	11.46	9.59	8.81	10.42	16.25	16.64	17.95	20.19	20.18	19.37
AT1G07383		-	0	0	0	0	0	0	0	0	0	0	0	0	0	0	0	0	0	0
AT1G07390	AtRLP1	Receptor like protein 1 [Source:UniProtKB/TrEMBL;Acc:F4HQM4]	0.78	1.03	1.11	0.89	1.13	1.1	1.08	0.98	0.95	1.89	1.6	1.9	1.11	1.19	1.19	1.15	1.23	0.85
AT1G07393		-	0	0	0	0	0	0	0	0	0	0	0	0	0	0	0	0	0	0
AT1G07397		-	0	0	0	0	0	0	0	0	0	0	0	0	0	0	0	0	0	0
AT1G07400	HSP17.8	17.8 kDa class I heat shock protein [Source:UniProtKB/Swiss-Prot;Acc:Q9LNW0]	20.21	20.6	21.14	59.89	58.35	55.85	2.32	3.78	4.02	134.82	131.13	137.91	26.53	23.51	24.64	314.06	334.86	341.07
AT1G07407		-	0	0	0	0	0	0	0	0	0	0	0	0	0	0	0	0	0	0
AT1G07410	RABA2B	RABA2b [Source:UniProtKB/TrEMBL;Acc:A0A178WHD5]	11.57	9.26	8.99	6.23	8.7	8.37	6.15	6.19	5.42	10.1	8.81	10.43	11.15	8.88	9.25	11.54	10.2	10.96
AT1G07413		-	0	0	0	0	2.21	0.9	0	0	0.4	3	2.12	1	4.4	4.12	4.53	5.67	3.5	4.76
AT1G07417		-	0	2.05	0	1.82	0	0	4.78	0	0	3.93	1.66	2.04	3.84	6.6	6.51	5.46	1.63	5.08
AT1G07420	SMO2-2	Methylsterol monooxygenase 2-2 [Source:UniProtKB/Swiss-Prot;Acc:Q8VWZ8]	47.69	46.71	45.63	55.37	56.35	55.67	58.58	60.94	58.79	53.13	55.46	52.97	66.73	62.94	62.52	66.34	63.1	64.73
AT1G07423		-	0	0.9	0	0	0.4	0.4	0.38	2.11	0.36	0.45	0.76	1.34	0.88	2.59	3.23	1.7	1.97	1.17
AT1G07430	AIP1	Protein phosphatase 2C 3 [Source:UniProtKB/Swiss-Prot;Acc:Q9LNW3]	0.39	0.16	0.38	1.26	0.89	0.69	2.77	2.29	2.88	4.37	4.26	4.53	2.27	2.59	2.8	3.61	2.48	2.82
AT1G07433		-	0	0	0	0	0	0	9.32	0	0	0	5.05	6.42	5.94	5.16	0	5.43	0	4
AT1G07437		-	0	0	0	0	0	0	0	0	0	0	0	0	0	0	3.88	0	0	2.47
AT1G07440		Tropinone reductase homolog At1g07440 [Source:UniProtKB/Swiss-Prot;Acc:P0DKI3]	3.05	2.09	2.31	1.18	2.05	2.34	2.56	1.73	2.84	0.41	0.61	1.15	0.25	0.21	0.38	0.19	0.79	0.31
AT1G07447		-	0.2	0	0	0	0.41	0	0.2	0	0	0	0	0	0	0	0	0.22	0.21	0
AT1G07450		Tropinone reductase homolog At1g07450 [Source:UniProtKB/Swiss-Prot;Acc:Q8RX32]	0	0.06	0.29	0.13	0.28	0	1.25	0.84	1.62	0	0.06	0	0.06	0.11	0.25	0	0.12	0.11
AT1G07453		-	0	0	0	0	0	0	0	0	0	0	0	0	0	0	0	0	0	0
AT1G07457		-	0	0	0.08	0	0	0	0	0	0	0	0	0	0	0.07	0	0.17	0	0
AT1G07460		Concanavalin A-like lectin family protein [Source:UniProtKB/TrEMBL;Acc:Q9LNW6]	0	0	0	0	0	0	0	0	0.06	0	0	0	0	0	0	0	0	0
AT1G07463		-	0	0.27	0	0	0	0	0	0	0	0	0	0	0	0	0	0	0	0
AT1G07467		-	0	0	0	0	0	0	0	0	0	0	0	0	0	0	0	0	0	0
AT1G07470		At1g07470/F22G5_13 [Source:UniProtKB/TrEMBL;Acc:Q93VP4]	26.44	25.25	25.07	24.78	24.42	25.3	23.59	26.01	25.68	23.21	22.01	24.32	21.13	20.78	22.78	20.3	20.39	21.87
AT1G07473		F22G5.17 [Source:UniProtKB/TrEMBL;Acc:Q9LNW8]	9.2	5.61	7.52	16.78	15.97	15.87	14.25	10.57	11.15	0.64	0.95	1.53	1.05	1.61	1.06	0.74	1.15	1.37
AT1G07476		At1g07476 [Source:UniProtKB/TrEMBL;Acc:Q9LNX0]	1.04	1.15	1.1	3.84	2.84	4	2.21	1.67	1.97	0.29	0	0.7	0.56	0.38	0.72	0.33	0.19	0.3
AT1G07477		-	0.93	1.23	1.35	1.21	1.6	2.07	6.75	5.72	6.14	0.96	0.42	0.08	0.55	0.32	0	0.51	0.08	0.27
AT1G07480		Transcription factor IIA, alpha/beta subunit [Source:TAIR;Acc:AT1G07480]	20.11	22.12	19.68	22.19	23.05	21.74	22.73	21.69	20.61	25.05	25.12	25.09	29.83	26.35	27.97	26.95	27.98	27.2
AT1G07483		-	0	0	0	0	0	0	0	0	0	0	0	0	0	0	0	0	0	0
AT1G07485		Uncharacterized protein At1g07490 [Source:UniProtKB/TrEMBL;Acc:Q67XE6]	0	0.11	0	0	0	0.48	0	0.24	0.09	0	0	0	0	0	0	0	0	0
AT1G07487		-	0	0	0	0	0	0	0	0	0	0	0	0	0	0	0	0	0	0
AT1G07490	RTFL3	RTFL3 [Source:UniProtKB/TrEMBL;Acc:A0A178W1R5]	0.62	0	0	0.49	0.11	0.18	0.53	0.25	0.98	0	0	0	0.12	0	0	0	0	0
AT1G07493		-	0	0	0	0	0	0	0	0	0	0	0	0	0	0	0	0	0	0
AT1G07497		-	0	0	0	0	0	0	0	0	0	0	0	0	0	0	0	0	0	0
AT1G07500	SMR5	Cyclin-dependent protein kinase inhibitor SMR5 [Source:UniProtKB/Swiss-Prot;Acc:Q9LNX4]	0	0	0	0.9	0.75	1.58	0	0	0	1.86	0	0	0	0	0	0	4.23	0
AT1G07503		-	0	0	0	0	0	0	0	0	0	0	0	0	0	0	0	0	0	0
AT1G07507		-	0	0	0	0	0	0	0	0	0	0	0	0	0	0	0	0	0	0
AT1G07510	FTSH10	ATP-dependent zinc metalloprotease FTSH 10, mitochondrial [Source:UniProtKB/Swiss-Prot;Acc:Q8VZI8]	25.83	27.02	27.48	24.1	22.12	24.22	23.91	23.46	24.77	30.84	30.23	32.03	31.84	33.19	32.15	30.11	30.03	29.83
AT1G07513		-	4.07	5.32	16.48	5.35	17.73	7.01	4.92	9.75	11.93	1.71	25.29	10.61	4.49	7.29	12.48	3.52	9.46	10.13
AT1G07517		-	0.17	0.65	0.78	0.39	0.58	0.55	0.55	1.04	0.55	1.37	1.97	1.78	1.83	1.59	1.28	1.57	1.38	0.99
AT1G07520		GRAS family transcription factor [Source:TAIR;Acc:AT1G07520]	0	0.84	0.68	0	0	0.14	0.24	0.61	0.54	0.13	0.63	0.11	0.35	0.4	0.27	0.38	0.29	0.26
AT1G07523		-	0	0	0	0	0	0	0	0	0	0	0	0	0	0	0	0	0	0
AT1G07527		-	0	0	0	0	0	0	0	0	0	0	0	0	0	0	0	0	0	0
AT1G07530	SCL14	AT1G07530 protein [Source:UniProtKB/TrEMBL;Acc:B9DFJ3]	12.6	17.89	18.56	16.43	17.02	17.83	29.28	28.27	27.83	20.38	19.81	19.74	26.86	28.11	28.34	24.2	25.22	25.5
AT1G07533		-	0	0	0	1.39	4.07	0	0	0	1.16	0	0	0	0	0	0	0	0	0
AT1G07537		-	0	0	0	0	0	0	0	0	0	0	0	0	0	0	0	0	0	0
AT1G07540	TRP5	Telomere repeat-binding protein 5 [Source:UniProtKB/Swiss-Prot;Acc:Q6R0E3]	0	0.06	0.02	0	0.07	0.04	0.1	0.06	0.14	0.42	0.28	0.27	0.22	0.23	0.37	0.46	0.28	0.33
AT1G07543		-	0	0	7.31	0	0	0	0	0	0	0	6.49	8.29	15.34	6.65	0	0	0	0
AT1G07547		-	0	0	0.16	0.52	0.53	0.98	0	0.36	0	0.92	0.3	0.41	0.2	0	1.3	0.6	0.19	0.54
AT1G07550		Probable LRR receptor-like serine/threonine-protein kinase At1g07550 [Source:UniProtKB/Swiss-Prot;Acc:C0LGD8]	0	0.02	0	0	0.02	0	0	0	0	0	0	0	0	0	0	0	0	0
AT1G07553		-	0	0	0	0	0	0	0	0	0	0	0	0	0	0	0	0	0	0
AT1G07557		-	0	0	0	0	0	0	0	0	0	0	0	0	0	0	0	0	0	0
AT1G07560		Probable LRR receptor-like serine/threonine-protein kinase At1g07560 [Source:UniProtKB/Swiss-Prot;Acc:C0LGD9]	0.15	0.13	0.17	0.02	0.08	0.07	0	0	0	0	0	0	0	0.02	0.02	0.02	0	0.03
AT1G07563		-	1.44	0.06	0	3.73	2.83	0	0.53	1.63	2.26	4.14	0	1.22	0	0.37	1.65	0.08	1.92	1.13
AT1G07567		-	31.81	10.69	11.76	14.52	15.56	15.29	12.2	20.27	18.78	19.8	21.84	27.91	15.56	21.83	18.5	20.31	5.77	15.92
AT1G07570	APK1A	Protein kinase superfamily protein [Source:TAIR;Acc:AT1G07570]	20.34	19.79	19.83	14.85	16.8	14.13	20.79	20.63	19.7	7.97	7.63	7.21	8.62	7.54	7.7	5.73	6.59	6.3
AT1G07573		-	0	0	0	0	0	0	0	0	0	0	0	0	0	0	0	0	0	0
AT1G07580		pre-tRNA [Source:TAIR;Acc:AT1G07580]	0	0	0	0	0	0	0	0	0	0	0	0	0	0	0	0	0	0
AT1G07583		-	0	0	0	0	0	0	0	0	0	0	0	0	0	0	0	0	0	0
AT1G07587		-	0.22	0	0.7	0.78	1.01	0.48	3.96	3.89	4.48	1.31	1.43	1.24	2.7	2.25	3.16	4.33	4.6	4.67
AT1G07590		Pentatricopeptide repeat-containing protein At1g07590, mitochondrial [Source:UniProtKB/Swiss-Prot;Acc:Q940Q2]	11.97	9.53	11.14	24.31	19.23	21.95	22.78	21.38	23.63	17.51	21.46	15.18	38.58	39.02	26.63	60.85	66.7	68.45
AT1G07593		-	0	0	0	0	0	0	0	0	0	0	0	0	0	0	0	0	0	0
AT1G07597		-	3.49	3	1.39	0.71	0.66	0	0	0	0	1.47	0	0	0	0	0	0	1.91	0.64
AT1G07600	MT1A	Metallothionein-like protein 1A [Source:UniProtKB/Swiss-Prot;Acc:P43392]	0	0	0	0	0	0	0	0	0	0	0	0	0	0	0	0	0	0
AT1G07603		-	0.82	0.54	0.37	0.42	0.24	1.53	1.92	1	1.44	1.53	1.51	1.19	1.91	2.83	1.54	1.84	2.12	1.65
AT1G07607		-	1.04	0.41	0.81	0.81	1.02	0.37	1.44	1.36	0.76	0.55	1.03	0.38	1.04	1.42	1.37	1.01	1.09	0.57
AT1G07610	MT1C	Metallothionein-like protein 1C [Source:UniProtKB/Swiss-Prot;Acc:Q38804]	4.49	5.18	6.54	2.52	3.58	3.29	1.29	1.7	1.78	1.79	1.25	2.84	4.39	2.8	3.03	5.91	7.63	5.82
AT1G07613		-	0	0	0	0	0	0	0	0	0	0	0	0	0	0	0	0	0	0
AT1G07615	ATOBGM	Probable GTP-binding protein OBGM, mitochondrial [Source:UniProtKB/Swiss-Prot;Acc:F4HSD4]	7.76	9.87	9.38	9.8	9.23	10.73	7.88	8.92	7.58	11.9	11.62	11.01	8.15	7.44	7.63	6.76	6.57	5.68
AT1G07617		-	0	0	0	0	0	0	0	0	0	0	0	0	0	0	0	0	0	0
AT1G07620	ATOBGM	GTP-binding protein Obg/CgtA [Source:TAIR;Acc:AT1G07620]	0.05	0.02	0.03	0.08	0.11	0.12	0.28	0.15	0.27	1.06	0.81	0.89	1.75	2.03	1.68	3.26	3.16	2.72
AT1G07623		-	0.17	0.2	0.19	0	0.71	0	0.36	0.44	0.16	0.21	0	0	0.81	0	0.19	0	0.18	0.35
AT1G07627		-	0	0.16	0.14	0	0.28	0.15	0	0.17	0.26	0	0	0.31	0	0	0	0.15	0	0.14
AT1G07630	PLL5	PLL5 [Source:UniProtKB/TrEMBL;Acc:A0A178WGF5]	8.9	11.8	11.51	10.78	11.19	10.56	15.33	16.07	15.81	10.98	10.17	11.59	16.61	17.03	17.32	13.81	13.27	13.18
AT1G07633		-	0	0	0	0	0	0	0	0	0	0	0	0	0	0	0	0	0	0
AT1G07637		-	0	2.1	0	0	0	0	0	0	0	0	0	2.08	0	0	1.66	0	0	0
AT1G07640	OBP2	Dof-type zinc finger DNA-binding family protein [Source:UniProtKB/TrEMBL;Acc:Q2V4Q1]	8.46	9.51	8.61	5.21	5.97	5.17	2.69	2.72	2.5	6.03	5.71	5.5	2.82	3.07	3	3.3	3.35	3.45
AT1G07645	ATDSI-1VOC	DSI-1VOC [Source:UniProtKB/TrEMBL;Acc:A0A178W443]	2.2	0.65	0.71	2.27	1.55	1.78	0.59	0.92	0.99	1.82	2.47	1.5	4.12	3.51	4.62	7.17	8.68	6.23
AT1G07647		-	0	13.95	0	0	0	0	0	0	2.35	0	0	16.87	0	0	0	0	0	0
AT1G07650		Leucine-rich repeat transmembrane protein kinase [Source:UniProtKB/TrEMBL;Acc:F4HSE1]	6.94	11.31	11.38	8.31	9.75	8.22	10.76	11.51	11.24	12.1	12.54	11.92	10.82	10.63	9.77	9.56	9.27	9
AT1G07653		-	0	0	0	0	0	0	0	2.2	1.39	0	0	0	0	1.46	0.77	3.31	2.26	0
AT1G07657		-	0.58	1.5	0.69	1.41	0	0	1.86	1.82	0	0	1.88	0	0.72	0	1.94	0	0	0
AT1G07660		Histone H4 [Source:UniProtKB/Swiss-Prot;Acc:P59259]	93.65	80.68	79.28	92.96	87.15	85.69	86.28	86.24	87.83	70.9	61.08	63.39	63.86	60.15	64.01	69.14	64.45	67.65
AT1G07663		-	0	0	0	0.27	0	0	0	0	0	0	0.46	0.53	0.27	1.57	1.5	0.26	0.24	1.41
AT1G07667		-	0	0	0	0	0	0	0	0	0	0	0	0.09	0	0	0	0	0	0
AT1G07670	ECA4	Calcium-transporting ATPase 4, endoplasmic reticulum-type [Source:UniProtKB/Swiss-Prot;Acc:Q9XES1]	72.26	93.17	92.77	62.41	73.01	68.74	78.19	87.48	81.73	89.16	87.52	92.39	76.37	80.12	81.64	71.76	72.01	71.31
AT1G07673		-	0	0	0	0	0	0	0	0	0	0	0	0	0	0	0	0	0	0
AT1G07680		F24B9.23 [Source:UniProtKB/TrEMBL;Acc:Q9LQP3]	1.26	0.82	0.76	1.49	1.37	1.18	2.03	1.4	1.27	0.11	1.7	1.01	1.89	0.78	0.69	0.3	0.86	0.72
AT1G07683		-	8.28	8.31	7.69	5.69	5.98	6.73	0.9	1.13	1.16	4.16	3.99	2.88	2.89	2.17	1.92	1.17	2.45	1.53
AT1G07690		FUNCTIONS IN: molecular_function unknown; INVOLVED IN: biological_process unknown; LOCATED IN: endomembrane system; EXPRESSED IN: root; CONTAINS InterPro DOMAIN/s: Orthoreovirus membrane fusion p10 (InterPro:IPR009854); BEST Arabidopsis thaliana pro /.../atch is: unknown protein (TAIR:AT1G54950.1); Ha. [Source:TAIR;Acc:AT1G07690]	12.25	13.82	12.2	15.13	12.67	13.73	6.75	7.23	7.08	3.63	5.75	4.35	5.33	5.37	3.9	1.86	4.26	3.37
AT1G07693		-	0	1.16	0	0	0	0	0	5.73	0	0	0	0	0	0	0	0	0	0
AT1G07697		-	1.2	0	0.68	1.08	0.32	0.7	1.89	0.85	1.76	0.74	0.62	1.09	1.45	0.91	1.34	1.05	0	1.31
AT1G07700		Thioredoxin superfamily protein [Source:TAIR;Acc:AT1G07700]	10.7	9.22	10.64	11.16	11.64	11.47	14.95	15.55	13.97	8.91	9.68	8.05	11.06	11.27	9.89	10.56	12.45	12.41
AT1G07702		snoRNA [Source:TAIR;Acc:AT1G07702]	0	0	0	0	0	0	0	0	0	0	0	0	0	0	0	0	0	0
AT1G07703		-	0	0	0	0	0	0.91	0	0	0.4	0	0	0.5	0.49	0	0	1.43	1.32	0.87
AT1G07705		NOT2 / NOT3 / NOT5 family [Source:UniProtKB/TrEMBL;Acc:A8MR45]	12.53	16.39	18	12.61	14.41	14.58	13.82	16.91	15.52	17.18	17.87	17.47	17.8	19.84	18.54	20.2	19.77	18.4
AT1G07707		-	0	0	0	0	0	0	0	0	0	0	0	0	0	0	0	0	0	0
AT1G07710		Ankyrin repeat family protein [Source:UniProtKB/TrEMBL;Acc:Q9LQP7]	23.26	29.11	28.98	14.35	15.42	15.76	4.05	3.41	3.92	5.34	4.52	4.88	1.83	2.75	2.81	1.9	2.27	2.5
AT1G07717		-	0	0	0	0	0	0	0	0	0	0	0	0	0	0	0	0	0	0
AT1G07720	KCS3	3-ketoacyl-CoA synthase 3 [Source:TAIR;Acc:AT1G07720]	209.09	240	226.8	166.91	184.8	187.94	92.47	90.04	90.26	129.06	116.67	127.84	72.36	78.34	79.56	62.31	61.47	65.55
AT1G07723		-	0	0	0	0	0	0	0	0	0	0	0	0	0	0	0	0	0	0
AT1G07725	ATEXO70H6	Exocyst subunit Exo70 family protein [Source:UniProtKB/TrEMBL;Acc:Q9LQP9]	4.28	6.76	5.88	0	4.71	3.89	4.92	4.99	6.13	5.77	6.34	4.58	5.63	5.53	5.22	5.66	4.9	4.7
AT1G07727		-	0	0	0	0	0	0	0	0	0	0	0	0	0	0	0	0	0	0
AT1G07728		other RNA [Source:TAIR;Acc:AT1G07728]	4.11	2.2	2.21	8.53	2.78	3.21	4.8	5.24	3.84	2.26	2.56	2.68	2.23	2.56	2.62	1.72	2.59	2.34
AT1G07730	DIR25	Dirigent protein 25 [Source:UniProtKB/Swiss-Prot;Acc:Q9LQQ0]	2.58	1.18	1.53	3.08	2.57	1.34	1.4	1.87	1.3	0	0	0	0	0	0	0.1	0	0
AT1G07733		-	13.05	0	1.79	0	0	0	5.23	0	0	0	0	0	7.73	0	1.36	4.87	0	6.94
AT1G07737		-	0	0.24	0	25.06	0	0	52.61	38.42	12.99	0	0	0	25.74	0	29.28	13.43	0.94	0
AT1G07740		Pentatricopeptide repeat-containing protein At1g07740, mitochondrial [Source:UniProtKB/Swiss-Prot;Acc:Q9LQQ1]	3.8	4.23	3.46	2.98	3.14	3.59	3.77	4.13	4.12	5.5	5.88	5.34	4.41	4.58	4.45	3.28	4.46	4.87
AT1G07743		-	1.96	1.72	1.37	2.32	1.9	1.98	1.78	1.53	1.91	1.63	3.23	2.9	2.19	2.58	2.86	2.75	3.86	2.89
AT1G07745	RAD51D	DNA repair protein RAD51 homolog 4 [Source:UniProtKB/Swiss-Prot;Acc:Q9LQQ2]	8.09	7.44	6.59	8.2	7.68	8.78	7.24	8.86	7.91	9	9.53	9.19	10.4	9.61	9.36	10.24	12.03	10.64
AT1G07747		Bifunctional inhibitor/lipid-transfer protein/seed storage 2S albumin superfamily protein [Source:UniProtKB/TrEMBL;Acc:A8MRP3]	3.92	2.08	1.92	1.92	2.75	0.88	0	0	0	0	0	0	0	0	0	0	0	0
AT1G07750		At1g07750/F24B9_13 [Source:UniProtKB/TrEMBL;Acc:Q9LQQ3]	343.04	246.21	229.37	255.28	242.15	233.1	204.96	212.05	202.76	114.3	117.27	113.52	105.31	108.23	111.03	117.87	112.31	113.75
AT1G07753		-	0	0	0	0	0	0	0	0	0	0	0	0	0	0	0	0	0	0
AT1G07757		-	0	0	0	0	0	0	0	0	0	0	0	0	0	0	0	0	0	0
AT1G07760		pre-tRNA [Source:TAIR;Acc:AT1G07760]	0	0	0	0	0	0	0	0	0	0	0	0	0	0	0	0	0	0
AT1G07763		-	0	0	0	0	0	0	0	0	0	0	0	0	0	0	0	0	0	0
AT1G07767		-	0	0	0	0	0	0	0	0	0	0	0	0	0	0	0	0	0	0
AT1G07770	RPS15AF	40S ribosomal protein S15a-1 [Source:UniProtKB/Swiss-Prot;Acc:P42798]	286.65	238.29	224.67	314.49	254.09	279.38	239.47	222.75	209.88	257.9	268.17	216.31	211.03	188.75	179.74	214.33	208.58	206.87
AT1G07773		-	0	0	0	0	0	0	0	0	0	0	0	0	0	0	0	0	0	0
AT1G07777		-	0	0	0	0	0	0	0	0	0	0	0	0	0	0	0	0	0	0
AT1G07780	PAI1	N-(5'-phosphoribosyl)anthranilate isomerase 1, chloroplastic [Source:UniProtKB/Swiss-Prot;Acc:Q42440]	201.37	156.91	166.48	159.81	168.03	174.17	162.45	165.22	163.87	123.98	133.22	133.27	133.42	134.7	135.95	114.17	119.34	132.99
AT1G07783		-	0	0	0	0	0	0	0	0	0	0.1	0	0.1	0	0.08	0	0.1	0	0
AT1G07787		-	0	0	0	0	0	0	0	0	0	0	0	0	0	0	0	0	0	0
AT1G07790	HTB1	Histone H2B.1 [Source:UniProtKB/Swiss-Prot;Acc:Q9LQQ4]	160.94	134.51	130.54	211	179.76	175.61	194.3	188.2	186.15	122.34	120.24	118.12	128.76	122.25	125.86	97.28	95.76	101.06
AT1G07793		-	0	0	0	0	0	0	0	0	0	0	0	0	0	0	0	0	0	0
AT1G07795		At1g07795 [Source:UniProtKB/TrEMBL;Acc:Q29PW8]	8.04	6.13	5.17	4.84	3.97	4.16	0.94	1.65	1.19	1.42	1.67	1.64	0.41	0.41	0.15	0.31	0.45	0.49
AT1G07803		-	22.05	14.94	18.56	6.61	11.92	16.25	9.1	15.36	12.72	17.13	20.87	8.99	26.19	17.01	17.84	18.3	14.93	20.92
AT1G07807		-	0	0	0	0.56	0	0	0	0	0.46	0.58	0.98	0.58	0	0	1.03	0.55	0.5	1
AT1G07810	ECA1	Calcium-transporting ATPase 1, endoplasmic reticulum-type [Source:UniProtKB/Swiss-Prot;Acc:P92939]	21.6	27.44	29.1	20.07	21.65	22.55	29.96	33.48	31.71	36.77	36.69	38.55	47.44	49.8	47.63	50.22	49.47	50.72
AT1G07813		-	0	0	0	0	0	2.04	0	0.07	0.54	3.83	0.63	0	2.69	0	0	0	0	3.07
AT1G07820		Histone H4 [Source:UniProtKB/TrEMBL;Acc:Q6NR90]	278.32	252.87	255.27	263.55	236.09	229.44	260.96	246.48	251.44	151.36	156.57	146.01	145.15	134.19	141.48	110.57	111.03	113.92
AT1G07823		-	0.03	0	0.86	0.26	0.62	0	0.67	0	0.57	0.18	0	0	0.45	0.13	0	1.03	0	0.94
AT1G07827		-	0	0	0	0	0	0	0	0	0	0	0	0	0	0	0	0	0	0
AT1G07830		At1g07830/F24B9_7 [Source:UniProtKB/TrEMBL;Acc:Q94JQ7]	32.3	26.44	25.51	31.26	27.41	27.8	23.19	23.4	23.17	32.31	39.26	35.87	26.97	27.9	27.71	24.96	25.6	25.85
AT1G07833		-	0	0	0	0	0	0	0	0	0	0	0	0	0	0	0	0	0	0
AT1G07837		-	0	0	0	0	0	0	0	0	0	0	0	0	0	0	0	0	0	0
AT1G07840		AT1G07840 protein [Source:UniProtKB/TrEMBL;Acc:Q93ZQ9]	26.43	27.86	33.07	40.9	38.76	34.54	27.92	28.73	26.41	34.68	34.95	36.64	35.4	33	31.65	29.21	26.7	28.03
AT1G07843		-	0	0	0	0	0	0	0	0	0	0	0	0	0	0	0	0	0	0
AT1G07847		-	0	0	0	0	0	0	0	0	0	0	0	0	0	0	0	0	3.51	0
AT1G07850		Glycosyltransferase [Source:UniProtKB/TrEMBL;Acc:F4HSH8]	0.4	0.19	0.18	0.56	0.48	0.65	0.41	0.21	0.35	0.35	0.25	0.31	0.19	0.77	0.33	0.47	0.26	0.5
AT1G07853		-	29.1	28.2	13.67	46.37	58.89	53.37	66.76	27.38	39.58	32.19	21.44	31.36	42.38	33.98	15.02	35.43	49.49	47.1
AT1G07857		-	0	0	0	0	0	0	0	0	0	0	0	0	0	0	0	0	0	0
AT1G07860		Serine/Threonine-kinase RLCKVII protein [Source:UniProtKB/TrEMBL;Acc:Q8RY98]	1.58	3.25	1.86	3.24	1.55	3	1.71	1.73	1.27	2.59	0.22	0	1.28	1.79	1.06	1.82	1.82	0
AT1G07863		-	0	0	0	0	0	0	0	0	0	0	0	0	0	0	0	0	0	0
AT1G07867		-	0	0	0	0	0	0	0	7.53	0	0	0	0	0	0	2.46	0	0	0
AT1G07870		Protein kinase superfamily protein [Source:UniProtKB/TrEMBL;Acc:F4HSH9]	46.91	50.61	52.23	54.23	58	59	58.23	59.08	55.66	46.71	42.56	44.51	53.65	52.82	52.02	54.87	51.65	54.53
AT1G07873		-	0	0	0	0	0	0	0	0	0	0	0	0	0	0	0	0	0	0
AT1G07877		-	0.36	0.41	0.63	0.28	0.48	0.26	1.1	0.29	1.57	0.14	0.36	0	0.56	0.81	0	0.27	0	0.36
AT1G07880	MPK13	Mitogen-activated protein kinase 13 [Source:UniProtKB/Swiss-Prot;Acc:Q9LQQ9]	1.25	1.12	0.99	1.03	1.23	1.08	0.92	0.73	0.6	0.97	1.14	1.23	0.63	0.84	0.75	0.89	1.16	1.02
AT1G07883		-	0	0	0	0	0	0	0	0	0	0	0	0	0	0	0	0	0	0
AT1G07885		unknown protein; FUNCTIONS IN: molecular_function unknown; INVOLVED IN: biological_process unknown; LOCATED IN: cellular_component unknown; Ha. [Source:TAIR;Acc:AT1G07885]	1.04	0.19	0	0	0.51	0.54	0	0	0	0.43	0	1.71	1.12	0.32	0.36	0	0.7	0.5
AT1G07887		-	0	1.05	0	2.73	0.31	0	0.92	0	1.14	3.28	0	0	0.37	0	0	0	0.63	0
AT1G07890	APX1	MEE6 [Source:UniProtKB/TrEMBL;Acc:A0A178W5I1]	1675.05	1299.61	1270.23	1071.88	974.46	940.16	674.33	705.48	640.7	618.93	595.18	610.02	455.17	445.48	466.15	390.24	406.22	411.23
AT1G07893		-	0	6.31	5.23	0	0	0	0	0	0	0	0	0	0	0	0	0	0	0
AT1G07897		-	31.36	0	0	0	0	28.69	0	0	0	0	0	0	0	0	31.96	0	0	0
AT1G07900	LBD1	LBD1 [Source:UniProtKB/TrEMBL;Acc:A0A178WM56]	0	0	0	0	0	0	0	0	0	0	0	0	0	0	0	0	0	0
AT1G07901		unknown protein; Ha. [Source:TAIR;Acc:AT1G07901]	0	0	0	0	0	0	0	0	0	0	0	0	0	0	0	0	0	0
AT1G07902		-	1.61	1.72	1.45	1.53	1.19	1.3	1.49	1.28	1.47	1.51	2.03	1.61	1.53	1.64	2	1.13	1.12	1.34
AT1G07903		-	0	0	0	0	0	0	0	0	0	0	0	0	0	0	0	0	0	0
AT1G07907		-	0	0	0.69	0	0	0	0	0	0	0	0	0	0	0	0	0	0	0
AT1G07910	ATRNL	RNAligase [Source:TAIR;Acc:AT1G07910]	5.08	7.28	7.54	6.02	6.57	6.01	6.14	6.46	6.81	8.43	8.69	8.69	8.28	8.24	8.58	8.3	9.07	8.65
AT1G07913		-	0	0	0	0	0	0	0	0	0	0	0	0	0	0	0	0	0	0
AT1G07917		-	0	0	0	0	0	0	0	0	0	0	0	0	0	0	0	0	0	0
AT1G07920	A1	Elongation factor 1-alpha 4 [Source:UniProtKB/Swiss-Prot;Acc:Q8GTY0]	893.07	744.53	731.24	798.33	789.64	795.49	700.26	709.52	694.72	1007.16	1015.69	1051.33	901.52	882.96	910.74	815.31	818.08	824.36
AT1G07923		-	0	0	0	0	0	0	0	0	0	0	0	0	0	0	0	0	0	0
AT1G07927		-	0	0	0	0	0	0	0	0	0	0	0	0	0	0	0	0	0	0
AT1G07930	A1	Elongation factor 1-alpha 4 [Source:UniProtKB/Swiss-Prot;Acc:Q8GTY0]	488.09	472.2	470.02	463.1	480.4	466.63	359.56	391.08	388.35	568.08	555.16	598.07	475.58	477.61	501.68	400.19	418.15	434.38
AT1G07933		-	0	0	0	0	0	0	0.09	0.2	0.16	0	0.17	0.28	0	0.08	0	0	0.43	0.17
AT1G07937		-	0	0	0	0	0	0	0	0	0	0	0	0	0	0	0	5.56	0	0
AT1G07940	A1	Elongation factor 1-alpha 4 [Source:UniProtKB/Swiss-Prot;Acc:Q8GTY0]	651.68	623	621.49	538.01	593.89	576.86	516.68	565.32	524.53	818	827.15	853.86	731.05	718.28	746.09	630.7	660.7	672.6
AT1G07943		-	1.93	1.68	1.25	1.36	3.56	1.25	0.59	0.78	0.83	2.04	1.75	1.07	2.99	1.67	2.46	1.6	1.2	1.46
AT1G07947		-	0	0	0	0	0	0	0	0	0	0	0	0	0	0	0	0	0	0
AT1G07950	MED22B	Surfeit locus protein 5 subunit 22 of Mediator complex [Source:TAIR;Acc:AT1G07950]	27.78	23.81	22.41	25.28	24.55	21.53	22.37	23.92	21.59	23.94	26.83	22.79	22.84	22.58	22.48	19.12	22.25	24.55
AT1G07957		-	0	0	0	0	0	0	0	0	0	0	0	0	0	0	0	0	0	0
AT1G07960	PDIL5-1	PDIL5-1 [Source:UniProtKB/TrEMBL;Acc:A0A178WDX4]	55.98	44.82	41.7	55.47	48.82	53.26	41.27	36.56	35.01	51.87	57.12	48.9	48.49	46.84	41.01	42.45	47.66	46.4
AT1G07963		-	0	0	0	0	10.68	7.86	0	0	0	0	0	0	0	9.7	0	10.01	0	9.33
AT1G07967		-	0.6	0	0	0.73	0	0.67	1.92	0.95	2.41	0	0	0.77	0.75	0	1.34	2.88	0	0
AT1G07970		Cytochrome B561, amino-terminal protein [Source:UniProtKB/TrEMBL;Acc:Q9LN10]	11.56	14.65	15.79	13.44	14.11	13.6	14.5	14.89	14.74	19.24	19.01	19.38	17.38	18.06	17.73	15.71	14.68	15.4
AT1G07973		-	0	0	0	0	0	0	0	0	0	0	0	0	0	0	0	0	0	0
AT1G07977		-	0	0	0	0	0	0	0	0	0	0	0	0	0	0	0	0	0	0
AT1G07980	NF-YC10	At1g07980 [Source:UniProtKB/TrEMBL;Acc:Q9LN09]	34.77	29.49	27.42	30.34	27.36	29.16	23.57	22.73	24.29	37.55	39.13	41.91	37.42	36.85	36.51	41.1	39.37	43.65
AT1G07983		-	106.98	98.52	131.19	152.6	140.26	135.94	147.34	98.45	108.5	224.45	247.02	181.94	172.42	119.35	187.8	144.29	74.95	122.04
AT1G07985		Expressed protein [Source:UniProtKB/TrEMBL;Acc:Q3EDG6]	0.12	0	0	0	0	0.13	0.12	0	0	0.14	0.06	0.19	0.61	0.56	0.71	0.78	0.75	0.64
AT1G07987		-	0	0	0	0.85	0	0	0	0	0	2.18	1.9	0.85	4.58	3.84	3.92	4.93	2.53	6.79
AT1G07990		At1g07990/T6D22_5 [Source:UniProtKB/TrEMBL;Acc:Q8L7T5]	17.16	22.43	22.98	23.9	21.68	21.87	26.45	25.32	24.34	31.27	32.29	31.07	35.4	37.2	37.17	35.33	36.35	36.61
AT1G07993		-	0	0	0	0.35	0.15	0	0	0	0	0.18	0	0	0	0	0	0	0	0
AT1G07997		-	0	0	0	0	0	0	0	0	0	0	0	0	0	0	0	0	0	0
AT1G08000	GATA10	GATA10 [Source:UniProtKB/TrEMBL;Acc:A0A178WGW3]	10.68	9.63	8.51	12.06	11.55	11.92	12.48	11.87	11.37	10.6	11.57	10.34	9.06	10.1	10.23	9.54	9.05	9.57
AT1G08003		-	0	0	0	0	0	0	0	0	0	0	0	0	11.35	0	0	0	0	0
AT1G08005		Serine/threonine-protein phosphatase 6 regulatory subunit [Source:UniProtKB/TrEMBL;Acc:Q1G325]	0	0	0	0	0	0	0	0	0	0	0	0	0	0	0	0	0	0
AT1G08007		-	0	0	0	0	0	0	0	0	0	0	0	0	0	0	0	0	0	0
AT1G08010	GATA11	GATA11 [Source:UniProtKB/TrEMBL;Acc:A0A384LF57]	18.89	18.76	17.3	19.7	20.86	22.69	23	24.76	20.99	18.86	19.85	17.8	16.53	17.69	17.65	17.46	16.87	15.94
AT1G08013		-	0	0	0	0	0.14	0.31	2.48	2.9	2.21	0.5	0	0.08	0.17	0.07	0.35	0.16	0.08	0.57
AT1G08017		-	0	0	0	0	0	0	0	0	0	0	0	0	0	0	0	0	0	0
AT1G08023		-	0	0	0	0	0	0	0	0	0	0	0	0	0	0	0	0	0	0
AT1G08027		-	0	0	0	0	0	0	0	0	0	0	0	0	0	0	0	0	0	0
AT1G08030	TPST	Protein-tyrosine sulfotransferase [Source:UniProtKB/Swiss-Prot;Acc:Q3EDG5]	20.25	17.38	17.68	15.85	16.91	15.99	15.52	14.32	14.7	17.93	18.25	18.38	17.52	16.78	17.9	15.39	14.54	14.65
AT1G08033		-	0	1.43	0	1.3	0	0	0	1.8	0	1.38	3.51	0	0	0	1.17	1.29	2.33	1.19
AT1G08035	SMR16	Cyclin-dependent protein kinase inhibitor SMR16 [Source:UniProtKB/Swiss-Prot;Acc:Q9LN05]	3.09	2.46	2.01	2.78	2.77	4.03	1.23	2.52	3.26	3.26	5.15	4.8	3.21	3.51	2.3	3.42	2.93	1.85
AT1G08037		-	25.42	10.08	11.17	20.52	20.53	15.72	13.94	22.46	16	18.47	15.14	18.78	12.02	14.4	15.1	13.15	12.44	14.47
AT1G08040		Putative storage protein [Source:UniProtKB/TrEMBL;Acc:Q93ZR2]	45.93	39.51	33.83	34.79	34.82	36.14	25.74	24.12	24.57	23.53	26.54	28.16	21.96	23.76	24.27	22.94	20.35	22.22
AT1G08043		-	21.42	1.61	3.46	24.54	13.18	10.96	19	2.92	11.25	7.56	1.42	7.97	2.02	5.85	4.71	5.18	4.71	3.43
AT1G08047		-	1.92	2.44	5.08	0.58	3.76	0.54	4.07	2.19	2.39	1.21	3.58	7.25	5.9	4.97	1.07	2.28	1.57	1.57
AT1G08050		T6D22.13 [Source:UniProtKB/TrEMBL;Acc:Q9LN03]	4.47	4.18	4.78	4.97	4.82	4.61	4.63	4.67	4.8	6.8	6.8	7.75	8.88	8.01	9.24	9.59	9.76	9.22
AT1G08053		-	0	0	0	0	0	0	0	0	0	0	0	0	0	0	0	0	0	0
AT1G08057		-	0	0	0	0	0	0	0	0	0	0	0	0	0	0	0	0	0	0
AT1G08060	MOM	ATP-dependent helicase family protein [Source:TAIR;Acc:AT1G08060]	4.47	8.37	7.66	5.1	6.32	5.68	7.36	9.02	8.68	8.38	7.13	8.66	9.24	9.82	9.23	9.18	9.27	9.2
AT1G08063		-	0	0	0	0	0	0	0	0	0	0	0	0	0	0	0	0	0	0
AT1G08065	ACA5	Alpha carbonic anhydrase 5 [Source:UniProtKB/Swiss-Prot;Acc:F4HUC4]	3.77	3.78	3	2.68	3.13	3.37	0.69	0.99	0.9	3.07	3.18	2.17	5.64	4.06	3.6	4.34	4.98	4.54
AT1G08070	PCMP-H12	Pentatricopeptide repeat-containing protein At1g08070, chloroplastic [Source:UniProtKB/Swiss-Prot;Acc:Q9LN01]	1.04	1.98	1.98	0.92	1.35	1.44	1.81	1.75	1.87	1.74	2.67	2.98	2.23	2.23	2.01	1.1	1.55	1.42
AT1G08073		-	0	0	0	0	0	0	0	0	0	0	0	0	0	0	0	0	0	0
AT1G08077		-	0	0	0	0	0	0	0	0	0	0	0	0	0	0	0	0	0	0
AT1G08080	ACA7	Alpha carbonic anhydrase 7 [Source:UniProtKB/Swiss-Prot;Acc:Q8L817]	0	0	0	0	0	0	0	0	0	0.5	0.06	0.2	0.07	0.29	0.26	0	0.06	0.18
AT1G08087		-	0	0	0	0.22	0	0	0	0	0.24	0	0	0	0	0.11	0.14	0.15	0.04	0
AT1G08090	NRT2.1	High-affinity nitrate transporter 2.1 [Source:UniProtKB/Swiss-Prot;Acc:O82811]	0.02	0	0	0	0	0	0	0.02	0.02	0.18	0.08	0.26	0.05	0.14	0.07	0.1	0.02	0.15
AT1G08093		-	0	0	0	0	0	0	0	0	0	0	0	0	0	0	0	0	0	0
AT1G08097		-	1.29	0	0	0	0	0	0	0	0	0	0	0	0	0	0	0	1.42	0
AT1G08100	NRT2.2	NRT2 [Source:UniProtKB/TrEMBL;Acc:A0A178W7F7]	0	0	0	0	0	0	0	0	0	0	0	0	0	0	0	0	0	0
AT1G08103		-	0.65	0.52	0.48	0	0	0.24	0.23	0	0	0	0.89	0	0.26	0.22	0	0	0.7	0
AT1G08107		-	0	0	0	0	0	0	0	0	0	0	0	0	0	0	0	0	0	0
AT1G08110		Lactoylglutathione lyase [Source:UniProtKB/TrEMBL;Acc:B9DH52]	108.12	104.11	100.78	105.15	113.81	109.47	106.11	103.82	101.45	112.32	117.54	109.9	107.43	102.49	103.35	107.44	111.85	110.21
AT1G08113		-	0	0	0	0	0	0	0	0	0	0	0	0	0	0	0	0	0	0
AT1G08115		snRNA [Source:TAIR;Acc:AT1G08115]	0	0	0	21.32	0	0	0	0	0	0	0	0	0	0	16.99	0	0	19.81
AT1G08117		-	0	0	0	0	0	0	0	0	0	0	0	0	0	0	0	0	0	0
AT1G08120		TP53-regulating kinase-like protein [Source:UniProtKB/TrEMBL;Acc:Q5Q0I2]	0	0	0	0	0.1	0	0	0	0	0	0	0	0	0	0.06	0.19	0	0
AT1G08123		-	0	0	0	0	0	0	0	0	0	0	0	0	0	0	0	0	0	0
AT1G08125		S-adenosyl-L-methionine-dependent methyltransferases superfamily protein [Source:UniProtKB/TrEMBL;Acc:F4HUD6]	26.87	25.51	26.79	29.12	26.64	29.89	26.6	28.65	27.7	33.83	39.13	37.65	38.08	36.32	39.49	37.34	40.99	39.58
AT1G08127		-	0	0	0	0	0	0	0	0	0	0	0	0	0	0	0	0	0	0
AT1G08130	LIG1	DNA ligase 1 [Source:UniProtKB/Swiss-Prot;Acc:Q42572]	21.55	26.38	25.52	21.59	23.05	21.94	27.13	26.73	26.29	30.07	30.98	30.23	27.2	29.19	27.71	26.88	27.28	27.76
AT1G08133		-	0	0	0	0	0	0	0	0	0	0	0	0	0	0	0	0	0	0
AT1G08135	CHX6B	Cation/H(+) antiporter 6B [Source:UniProtKB/Swiss-Prot;Acc:P0CG16]	0	0	0.03	0	0	0	0	0	0	0	0	0	0	0	0.03	0	0.03	0
AT1G08137		-	0	0	0	0	0	0	0	0	0	0	0	0	0	0	0	0	0	0
AT1G08140	CHX6A	Cation/H(+) antiporter 6A [Source:UniProtKB/Swiss-Prot;Acc:Q8GX92]	0.02	0.08	0.06	0	0	0	0	0	0.03	0.07	0	0	0.09	0.01	0.02	0.05	0	0.01
AT1G08143		-	0	0	0	0	0	0	0	0	0	0	0	0	0	0	0	0	0	0
AT1G08147		-	0	0	0	0	0	0	0	0	0	0	0	0	0	0	0	0	0	0
AT1G08150	CHX5	Cation/H(+) antiporter 5 [Source:UniProtKB/Swiss-Prot;Acc:Q3EDG3]	0.03	0.05	0	0	0.05	0.05	0.03	0	0	0.02	0	0	0.04	0	0	0.07	0.07	0.06
AT1G08153		-	0.45	0.57	0	0.54	1.5	0	0.95	0.67	0	1.68	0	0	0.55	0	0.5	0	0.49	0.49
AT1G08157		-	0	0	0	0	0	0	0	0	0	0	0	0	0	0	0	0	0	0
AT1G08160		Uncharacterized protein At1g08160 [Source:UniProtKB/Swiss-Prot;Acc:Q8VZ13]	0.95	0.77	0.87	0.44	0.32	0.4	0	0.12	0.1	0	0	0.06	0	0	0	0	0	0
AT1G08163		-	0	0	0	0	0	0	0	0	0	0	0	0	0	0	0	0	0	0
AT1G08165		unknown protein; FUNCTIONS IN: molecular_function unknown; INVOLVED IN: biological_process unknown; LOCATED IN: cellular_component unknown; Ha. [Source:TAIR;Acc:AT1G08165]	2.47	1.31	2.35	2.38	2.41	1.6	4.03	3.09	4.06	0.46	0.61	0.26	2.6	2.97	2.8	1.12	0.99	1
AT1G08170		Histone H2B.2 [Source:UniProtKB/Swiss-Prot;Acc:Q9SGE3]	0	0.07	0.06	0	0	0	0.06	0	0.06	0	0.17	0.06	0.2	0.06	0.06	0.07	0	0.06
AT1G08173		-	0	0	0	0	0	0	0.54	0.22	0.82	0.21	0.52	1.6	2.04	2.04	0.95	2.75	1.85	1.59
AT1G08177		-	0	0	0	0	0	0	0	0	0	0	0	0	0	0	0	0	0	0
AT1G08180	SMR2	Cyclin-dependent protein kinase inhibitor SMR2 [Source:UniProtKB/Swiss-Prot;Acc:Q9SGE2]	13.96	9.51	8.93	8.46	6.47	6.36	5.32	3.43	3.11	3.71	3.38	2.71	2.12	1.7	2.76	1.46	1.95	2.16
AT1G08183		-	0	0	0	0	0	0	0	0	0	0	0	0	0	0	0	0	0	0
AT1G08190	VPS41	Vacuolar protein sorting-associated protein 41 homolog [Source:UniProtKB/Swiss-Prot;Acc:P93043]	36.78	52.73	55.11	36.87	38.47	41.42	35.8	37.73	36.45	41.26	40.65	45.79	46.74	49.51	47.46	45.59	47.24	47.78
AT1G08193		-	0	0	0	0	0	0	0	0	0	0	0	0	0	0	0	0	0	0
AT1G08200	AXS2	UDP-D-apiose/UDP-D-xylose synthase 2 [Source:UniProtKB/Swiss-Prot;Acc:Q9SGE0]	79.78	86.89	85.97	75.84	75.09	74.54	94.79	101.54	94.41	104.82	98.58	103.31	101.83	99.58	103.13	94.21	90.68	94.17
AT1G08207		-	0	0	0	0	0	0	0	0.23	0	0	0	0	0.42	0	0.19	0	0	0.18
AT1G08210		Eukaryotic aspartyl protease family protein [Source:TAIR;Acc:AT1G08210]	9.87	6.65	6.65	8.53	8.74	8.77	10.77	11.03	10.16	9.09	9.55	9.85	9.03	8.4	9.53	7.63	8.63	8.45
AT1G08213		-	2.64	0.76	1.55	1.62	3.23	1.74	1.23	1.33	2.47	1.98	1.5	2.39	1.89	1.14	1.69	0.88	1.64	1.04
AT1G08217		-	0.43	1.45	1.56	0.52	0.82	0.22	1.21	0.35	1.33	0.57	0.48	0	0.83	1.36	0.28	1.45	0.65	1.4
AT1G08220		ATPase complex subunit [Source:UniProtKB/TrEMBL;Acc:Q0WRX7]	11.61	8.8	9.35	10.69	10.83	11.3	8.38	9.39	8.99	12.7	11.24	11.31	9.51	9.93	9.98	8.62	8.46	8.87
AT1G08223		-	0	0	0	0	0	0	0	0	0	0	0	0	0	0	0	0	0	0
AT1G08227		-	0	0	0	0	0	0	0	0	0	0	0	0	0	0	0	0	0	0
AT1G08230	GAT1	GABA transporter 1 [Source:UniProtKB/Swiss-Prot;Acc:F4HW02]	0.22	0.12	0.28	0.79	1.19	1.3	2.4	2.39	3.02	0.4	0.7	1.12	1.47	1.14	1.55	2.63	1.85	2.11
AT1G08237		-	0	0	0	0	0	0	0	0	0	0	0	0	0	0	0	0	0	0
AT1G08240		pre-tRNA [Source:TAIR;Acc:AT1G08240]	0	0	0	0	0	0	0	0	0	0	0	0	0	0	0	0	0	0
AT1G08247		-	0	0	0	0	0	0	0	0	0	0	0	0	0	0	0	0	0	0
AT1G08250	ADT6	Arogenate dehydratase [Source:UniProtKB/TrEMBL;Acc:A0A178W954]	3.28	0	0	0	0	0	0	0	0	0	0	0	0	0.03	0	0.04	0.08	0
AT1G08253		-	0	0	0	0	0	0	0	0	0	0	0	0	0	0	0	0	0	0
AT1G08257		-	0	0	0	0	0	0	0	0	1.56	0	0	0	0	0	0	0	0	0
AT1G08260	POL2A	DNA polymerase epsilon catalytic subunit A [Source:UniProtKB/Swiss-Prot;Acc:F4HW04]	3.02	6.84	7.38	5.36	6.31	6.1	6.92	8.41	8.03	9.35	9.78	9.99	10.9	11.57	11.47	9.8	9.42	9.8
AT1G08263		-	0	0	0	0	0	0	0	0	0	0	0	0	0	1.7	0	0	0.87	2.66
AT1G08267		-	0	0	0	0	0	0	1.83	0	0	0	0	0	0	0	0	0	0	0
AT1G08270		CONTAINS InterPro DOMAIN/s: MIT (InterPro:IPR007330); BEST Arabidopsis thaliana protein match is: AAA-type ATPase family protein (TAIR:AT2G27600.1); Ha. [Source:TAIR;Acc:AT1G08270]	6.2	5.79	4.37	5.66	6.51	7.11	7.4	5.66	6.41	10.12	8.33	12	6.97	9.46	8.25	5.99	7.62	9.92
AT1G08273		-	0.56	0.67	1.05	1.23	0.57	2.11	3.02	3.3	2.98	0.87	0.57	1.15	0.96	0.01	0.87	0	0.99	0.3
AT1G08277		-	0	0	0	0	0	0	0	0	0	0	0	0	0	0	0	0	0	0
AT1G08280	GALT29A	Beta-1,6-galactosyltransferase GALT29A [Source:UniProtKB/Swiss-Prot;Acc:Q9SGD2]	4.92	5.74	6.24	4.82	4.29	4.18	14.69	14.59	14.49	23.37	25.54	25.49	19.8	18.53	17.61	14.53	14.08	16.72
AT1G08283		-	0	0	0	0	0.59	0.16	0	0	0.14	0	0	0.16	0.17	0	0	0	0	0
AT1G08287		-	5.63	5.08	3.66	4.8	2.65	2.97	1.4	1.38	2.89	4.66	4.04	6.09	6.4	5.57	6.63	7.45	4.74	9.54
AT1G08290	WIP3	Zinc finger protein WIP3 [Source:UniProtKB/Swiss-Prot;Acc:Q9SGD1]	0.66	0.82	0.53	0.38	0.27	0.32	0.12	0.36	0.25	0.34	0.26	0.24	0.25	0.33	0.08	0.11	0.21	0.19
AT1G08293		-	0	0	0	0	0	0	0	0	0	0	0	0	0	0	0	0	0	0
AT1G08297		-	0	0	0	0	0	0	0	0	0	0	0	0	0	0	0	0	0	0
AT1G08300	NVL	No vein-like protein [Source:UniProtKB/TrEMBL;Acc:F4HW09]	1.5	1.65	1.72	1.14	1.45	1.64	1.55	1.2	1.05	0.86	1.27	1.69	1.04	1.32	1.38	1.5	1.19	1.28
AT1G08303		-	0	0	0	0	0	0	0	0	0	0	0	0	0	0	0	0	0	0
AT1G08307		-	0	0	0	0	0	0	0	0	0	0	0	0	0	0	0	0	0	0
AT1G08310		Alpha/beta-Hydrolases superfamily protein [Source:UniProtKB/TrEMBL;Acc:A8MRK8]	0.13	0.11	0.27	0.39	0.3	0.29	1.91	1.64	2.21	0.54	0.42	0.61	1.67	2.01	1.8	0.4	0.56	0.52
AT1G08313		-	0	0	0	0	0	0	0	0	0	0	0	0	0	0	0	0	0	0
AT1G08315		ARM repeat superfamily protein [Source:UniProtKB/TrEMBL;Acc:Q0WNZ8]	3.23	3.01	1.16	2.75	5.4	1.04	2.57	2.16	0	1.66	3.86	1.18	5.35	2.33	2.11	2.01	3.28	2.89
AT1G08317		-	0	0	0	0	7	9.98	0	7.01	0	0	11.03	0	1.85	0	0	0	0.39	0
AT1G08320	TGA9	Transcription factor TGA9 [Source:UniProtKB/Swiss-Prot;Acc:Q93XM6]	0.41	0.32	0.2	0.48	0.5	0.56	3.46	4.1	3.99	1.03	0.92	1.15	4.71	4.21	4.63	8.03	8.75	8.22
AT1G08323		-	2.49	0	0	0	0	1.65	0	0	3.59	0.87	1.23	2.68	0	0	1.46	0	3.14	0
AT1G08327		-	0	0	0	0	0	0	0	0	0	0	0	0	0	0	0	0	0	0
AT1G08333		-	4.55	3.29	6.01	5.72	5.86	2.49	4.98	0	2.41	6.28	0	9.87	0	0	0	0	2.55	2.67
AT1G08337		-	0	0	0	0	0	0	0	0	0	0	0	0	0	0	0	0	0	0
AT1G08340	ROPGAP5	Rho GTPase-activating protein 5 [Source:UniProtKB/Swiss-Prot;Acc:Q6NKT5]	1.04	0.69	0.64	0.84	1.03	1.19	0.45	0.4	0.58	0.76	0.96	0.84	0.78	0.7	0.49	1.05	0.69	1.02
AT1G08343		-	0	0	0	0	0	0	0	0	0	0	0	0	0	0	0	0	0	0
AT1G08347		-	0	0	0	0	0	0	0	0	0	0	0	0	0	0	0	0	0	0
AT1G08350	TMN5	Transmembrane 9 superfamily member [Source:UniProtKB/TrEMBL;Acc:A0A178WGW9]	14.16	15.12	15.28	13.25	12.29	14.51	12.3	13.6	13.22	15.67	14.15	15.74	13.85	15.72	15.09	13.19	14.06	13.78
AT1G08353		-	0	0	0	0	0	0	0	0	0	0	0	0	0	0	0	0	0	0
AT1G08357		-	0	0	0	0	0	0	0	0	0	0	0	0	0	0	4.13	0	0	0
AT1G08360	RPL10AA	60S ribosomal protein L10a-1 [Source:UniProtKB/Swiss-Prot;Acc:Q8VZB9]	418.62	363.54	357.11	411.78	380.6	379.36	307.27	307.51	326.57	420.68	431.17	401.97	354.47	331.61	332.06	327.47	340.07	344.62
AT1G08363		-	0	0	0	0	0	0	0	0	0	0	0	0	0	0	0	0	0	0
AT1G08367		-	0	0	0	0	0	0	0	0	0	0	0	0	0	0	0	0	0	0
AT1G08370	DCP1	mRNA-decapping enzyme-like protein [Source:UniProtKB/Swiss-Prot;Acc:Q9SJF3]	45.94	43.43	44.07	48.26	43.76	48.71	46.29	43.84	47.82	69.02	68.45	65.23	63.42	63.1	61.95	65.11	65.46	63.18
AT1G08377		-	0	0	0	0	0	0	0	0	0	0	0	0	0	0	0	0	0	0
AT1G08380	PSAO	PSAO [Source:UniProtKB/TrEMBL;Acc:A0A178W5Y5]	160.54	113.36	111.42	165.12	149.55	149.94	338.84	315.83	326.39	18.65	22.36	21.69	37.54	37.02	36.53	36.5	33.72	31.13
AT1G08383		-	0	0	0	0	0	0	0	0	0	0	0	0	0	0	0	0	0	0
AT1G08387		-	0.27	0.34	0.41	0.6	0.05	0.78	0.27	0.46	0.43	0.11	0	0.43	0	0.15	0.52	0.44	1.04	0.55
AT1G08390		RecQ-mediated instability-like protein [Source:UniProtKB/TrEMBL;Acc:Q8RX36]	9.9	8.41	8.18	8.69	12.87	8.3	6.74	7.16	9.01	7.02	9.1	8.99	7.61	6.1	6.18	8.94	8.16	6.81
AT1G08393		-	0	1.62	0	0	3.57	0.7	0	0	0.63	0.79	0	1.6	0	0	0	2.24	0	0.69
AT1G08397		-	0	0	5.9	0	5.88	4.62	4.8	34.06	14.12	0	15.63	33.12	24.52	15.95	14.21	0	9.85	5.22
AT1G08400	MAG2L	RINT1-like protein MAG2L [Source:UniProtKB/Swiss-Prot;Acc:Q8GXP1]	4.3	4.32	3.94	4.55	4.16	4.09	4.33	4.29	3.92	5.53	5.93	5.63	6.63	5.69	5.78	5.25	5.16	5.44
AT1G08403		-	0	0	0	0	0	3.72	5.49	3.05	0	0	5.76	7.1	4.44	1.91	3.73	2.1	1.87	5.86
AT1G08410	LSG1-2	GTPase LSG1-2 [Source:UniProtKB/Swiss-Prot;Acc:Q9SJF1]	10.68	11.11	11.98	13.88	13.83	13.2	11.43	10.96	11.58	23.45	25.26	23.84	19.95	18.28	19.06	15.87	16.58	16.48
AT1G08413		-	3.44	0	0	2.14	4.31	3.8	5.61	6.23	5.4	4.65	9.81	2.42	11.35	9.77	7.61	4.28	3.83	3.99
AT1G08417		-	1.99	0	3.99	1.62	0	1.48	4.24	3.17	4.67	1.69	5.03	4.28	4.13	6.3	5.9	5.57	2.91	4.4
AT1G08420	BSL2	Serine/threonine-protein phosphatase BSL2 [Source:UniProtKB/Swiss-Prot;Acc:Q9SJF0]	14.95	21.39	19.07	25.02	26.45	26.82	36.69	35.17	36.42	29.78	29.97	31.79	39.37	40.13	38.49	39.2	39.5	39.34
AT1G08427		-	0	8.33	0	7.13	0	0	0	0	0	0	0	0	0	0	0	7.16	12.58	0
AT1G08430	ALMT1	Aluminum-activated malate transporter 1 [Source:UniProtKB/Swiss-Prot;Acc:Q9SJE9]	0.21	0.39	0.27	0.39	0.3	0.56	0.55	0.5	0.37	1.05	1.11	1.08	2.31	2.69	2.73	3.46	3.1	3.29
AT1G08433		-	0	0	0	0	0	0	0	0	0	0	0	0	0	0	0	0	0	0
AT1G08437		-	0	0	0	0	2.4	0	0	0	0	0	0	0	0	0	0	0	0	0
AT1G08440	ALMT2	Aluminum-activated malate transporter 2 [Source:UniProtKB/Swiss-Prot;Acc:Q9SJE8]	0	0	0	0	0	0	0	0	0	0.03	0	0.03	0	0.05	0.11	0.06	0.08	0.1
AT1G08443		-	0	0	0	0	0	2.61	0	0	5.06	3.3	2.77	3.46	0	0	2.63	3.01	0	5.61
AT1G08447		-	0	0	0	0	0	0	0	0	0	0	0	0	0	0.19	0.11	0	0.1	0.29
AT1G08450	CRT3	Calreticulin-3 [Source:UniProtKB/Swiss-Prot;Acc:O04153]	3.32	3.19	3.68	7.02	5.9	6.17	11.98	13.73	12.59	9.09	9.76	8.83	15.18	14.27	15.75	15.04	14.26	15.24
AT1G08453		-	0	0	0	0	0	0	0	0	0	0	0	0	0	0	0	0	0	0
AT1G08457		-	0.22	0.26	0	0	0	0	0	0	0	0.27	0	0.52	0	0	0	0	0.24	0
AT1G08460	HDA8	Histone deacetylase 8 [Source:UniProtKB/Swiss-Prot;Acc:Q94EJ2]	17.85	15.37	15.58	13.3	14.56	14.98	17.08	15.55	16.29	13.5	15.38	14.37	15.27	15.74	15.6	16.6	19.03	18.23
AT1G08463		-	0	0	8.59	0	0	0	0	0	0	0	0	0	0	0	0	0	0	0
AT1G08465	YAB2	Putative axial regulator YABBY 2 [Source:UniProtKB/Swiss-Prot;Acc:Q9XFB0]	2.43	2.43	1.95	1.73	2.25	1.46	4.98	6.03	5.39	0.39	0.33	0.32	0.29	0.8	0.69	0.42	0.22	0.25
AT1G08470	SSL3	SSL3 [Source:UniProtKB/TrEMBL;Acc:A0A178WK70]	26.79	23.03	21.91	27.34	27.31	27.75	26.75	28.13	27.79	46.13	44.05	39.97	39.99	39	38.69	40.26	41.13	41.69
AT1G08473		-	0	0	0	0	0	0	0	0	0	0	0	0	0	0	0	0	0	0
AT1G08477		-	134.96	112.52	107.77	107.39	118.87	106.17	76.14	71.55	64.61	85.83	89.56	90.05	70.48	68.22	70.37	61.99	56.28	55.72
AT1G08480	SDH6	Succinate dehydrogenase subunit 6, mitochondrial [Source:UniProtKB/Swiss-Prot;Acc:Q941A6]	158.32	128.26	126.46	148.34	130.63	131.5	112.38	95.16	94.63	99.56	113.87	102.94	108.73	91.91	100.9	112.38	113.72	116.28
AT1G08483		-	0	0	0	0	0	0	0	0	0	0	0	0	0	0	0	0	0	0
AT1G08487		-	0	0	0	0	0	0	0	0	0	0	0	0	0	0	0	0	0	0
AT1G08490	NFS2	SUFS [Source:UniProtKB/TrEMBL;Acc:A0A178WGK3]	14.05	14.02	14.52	15.76	14.47	16.25	17.66	18.89	17.73	22.83	25.39	23.91	26.09	24.98	24.5	25.94	26.9	22.42
AT1G08493		-	0	0	0	0	0	0	0	0	0	0	0	0	0	0	0	0	0	0
AT1G08497		-	0	0	0	0	0	0	0	0	0	0	0	0	0	0	0	0	0	0
AT1G08500	ENODL18	Early nodulin-like protein 18 [Source:UniProtKB/TrEMBL;Acc:O82083]	0.23	0.13	0	0.41	0.43	0.55	4.25	4.07	3.89	0.32	0.23	0.09	0.41	0.56	0.34	0.48	0.62	0.58
AT1G08503		-	0	0	0	0	0	0	0	0	0	0	0	0	0	0	0	0	0	0
AT1G08507		-	0	0	0	0	0	0	0	0	0	0	0	0	0	0	0	0	0	0
AT1G08510	FATB	Palmitoyl-acyl carrier protein thioesterase, chloroplastic [Source:UniProtKB/Swiss-Prot;Acc:Q9SJE2]	46.63	43.16	44.97	45.33	48.1	49.9	65.6	65.06	65.35	77	74.63	80.85	74.4	74.18	76.74	80.56	80.85	76.36
AT1G08513		-	0.3	0.18	0	0	0	0.08	0	0	0	0	0	0	0	0	0.09	0	0	0
AT1G08517		-	0	0	0	0	0	0	0	0	0	0	0	0	0	0	0	0	0	0
AT1G08520	CHLD	Mg-protoporphyrin IX chelatase [Source:UniProtKB/TrEMBL;Acc:A0A178W355]	19.1	21.1	23.1	22.4	22.85	23.04	38.7	39.29	41.25	16.17	16.67	18.16	20.78	19.63	19.52	17.1	18.33	17.48
AT1G08523		-	0	0	0	0	0	0	0	0	0	0	0	0	0	0	0	0	0	0
AT1G08530		Chitinase-like protein [Source:UniProtKB/TrEMBL;Acc:Q0WNC2]	16.75	15.64	17.66	21.8	17.84	19.67	17.59	15.74	17.81	18.54	18.78	18.06	19.88	17.74	19.81	18.42	20.7	20.56
AT1G08533		-	0	0	0	0	0	0	0	0	0	0	0	0	0	0	0	0	0	0
AT1G08537		-	1.07	0	0.82	0	0	0	0	0	0	0	0	0	0	0	0	0	0	0
AT1G08540	SIGB	RNA polymerase sigma factor sigB [Source:UniProtKB/Swiss-Prot;Acc:O22056]	15.34	17.76	16.16	21.37	21.33	19.78	24.82	26.79	26.98	20.06	18.99	22.67	22.04	23.29	21.47	21.19	19.75	18.96
AT1G08543		-	0.96	0	0.85	1.4	1.02	2.9	0.5	1.69	3.61	2.19	5.68	5.5	0.92	5	2.21	1.58	1.94	3.88
AT1G08547		-	0	0	0	0	0	0	0	0	0	0	0	0	0	0	0	0	0	0
AT1G08550	VDE1	NPQ1 [Source:UniProtKB/TrEMBL;Acc:A0A384K8V4]	9.14	9.87	9.86	13.83	14.51	12.12	15.61	14.74	15.1	10.78	10.16	8.81	12.76	12.5	11.24	10.66	11.02	10.11
AT1G08553		-	0	0	0	0	0	0	0	0	0	0	0	0	0	0	0	0	0	0
AT1G08557		-	0	0	0	1.25	0	0	0	0.13	1.93	0	0.29	0	2.27	0.85	0.91	0	3.33	0
AT1G08560	KN	SYP111 [Source:UniProtKB/TrEMBL;Acc:A0A178WAC8]	32.1	31.92	27.68	254.7	218.48	222.46	423.18	418.45	402	367.17	364.97	362.39	550.32	540.7	582.23	528.36	527.95	533.41
AT1G08563		-	0	0	0	0	0	0	2.03	0	0	0	4.28	2.65	0	0	0	4.67	2.08	0
AT1G08567		-	0.39	1.48	1.83	0.65	0.43	0.26	0.42	0	0	0.49	0.42	0.49	0.96	0.81	0	0.46	0	0
AT1G08570	ACHT4	Thioredoxin-like 1-1, chloroplastic [Source:UniProtKB/Swiss-Prot;Acc:O64654]	27.07	24.93	24.74	41.43	45.12	45.78	60.61	60.49	59.18	35.46	38.58	38.27	59.78	53.68	58.43	68.48	66.58	69.01
AT1G08573		-	0	0	0	0	0	0	0	0	0	0	0	0	0	0	0	0	0	0
AT1G08577		-	0	0	0	0	0	0	1.69	0	1.62	0	0	0	0	0	0	0	0	0
AT1G08580		At1g08580 [Source:UniProtKB/TrEMBL;Acc:Q9FRS7]	109.59	96.26	98.87	126.6	115.93	117.07	74.69	73.96	72.45	110.45	110.63	108.51	86.88	82.75	87.84	75.21	78.3	83.9
AT1G08583		-	0	0	0	0	0	0	0	0	0	0	0	0	0	0	0	0	0	0
AT1G08587		-	0	0	0	0	0	0	0	0	0	0	0	0	0	0	0	0	0	0
AT1G08590	PXL1	Leucine-rich repeat receptor-like protein kinase PXL1 [Source:UniProtKB/Swiss-Prot;Acc:Q9FRS6]	1.18	1.43	0.95	1.49	2.22	2.21	2.66	2.85	2.4	2.17	2.68	2	2.24	2.49	2.75	1.8	3.28	3.34
AT1G08592		Potential natural antisense gene, locus overlaps with AT1G08590 [Source:TAIR;Acc:AT1G08592]	1.64	1.89	2.23	1.09	0.15	0	0	0	0.44	0.92	0.69	1.25	1.2	1.22	1.11	0.88	0	0
AT1G08597		-	0	1.36	0	0	0	0	0	0	1.28	0	0	0	0	0.27	0	0	0	0.6
AT1G08600	ATRX	CHR20 [Source:UniProtKB/TrEMBL;Acc:A0A178VZQ9]	15.54	23.4	23.44	23.41	26.84	24.39	28.76	29.07	29.41	31.43	32.76	32.71	38.25	39.02	38.28	39.77	38.99	40.63
AT1G08603		-	0	0	0	0	0	0	0	0	0	0	0	0	0	0	0	0	0	0
AT1G08607		-	0	0	0	0	0	0	0	0	0	0	0	0	0	0	0	0	0	0
AT1G08610		Pentatricopeptide repeat-containing protein At1g08610 [Source:UniProtKB/Swiss-Prot;Acc:Q9FRS4]	3.22	2.97	3.11	2.94	2.8	3.03	3.4	3.27	3.61	3.24	3.16	3.19	2.62	2.19	2.35	1.93	1.79	1.92
AT1G08613		-	0	0	0	0	0	0	0	0	0	0	0	0	0	0	0	0	0	0
AT1G08620	PKDM7D	Transcription factor jumonji (jmj) family protein / zinc finger (C5HC2 type) family protein [Source:TAIR;Acc:AT1G08620]	7.76	13.04	13.79	9.64	11.7	11	11.96	13.91	13.2	13.82	13.64	13.95	15.68	15.53	15.59	16.06	15.01	15.06
AT1G08623		-	0	0	0	0	0	0	0	0	0	0	0	0	0	0	0	0	0	0
AT1G08627		-	0	0	0	0	0	0	0	0	0	0	0	0	0	0	0	0	0	0
AT1G08630	THA1	Probable low-specificity L-threonine aldolase 1 [Source:UniProtKB/Swiss-Prot;Acc:Q8RXU4]	47.51	44.4	43.29	102.75	100.46	104.52	122.66	129.87	129.08	192.29	196.93	203.1	196.28	192.83	197.48	195.71	196.94	196.11
AT1G08633		-	0	0	0	0	0	0	0	0	0.25	0.15	0.64	0.28	0.59	0	0	0.14	0.29	0.13
AT1G08637		-	0	0	0	0	0	0	0	0	0	0	0	0	0	0	0	0	0	0
AT1G08640	CJD1	Chloroplast J-like domain 1 [Source:UniProtKB/TrEMBL;Acc:Q93WG3]	29.53	32.22	32.76	39.19	36.97	38.99	39.35	39.91	37.19	34.38	36.91	32.65	36.31	33.15	32.37	35.14	38.43	35.02
AT1G08643		-	0	0	0	0	0	0	0	0	0	0	0	0	0	0	0	0	0	0
AT1G08645		-	0	0	0	0	0	0	0	0	0	0	0	0	0	0	0	0	0	0
AT1G08647		-	0	0	0	0	0	0	0	0	0	0	1.84	0	0	0	0	0	0	0
AT1G08650	PPCK1	Phosphoenolpyruvate carboxylase kinase 1 [Source:UniProtKB/Swiss-Prot;Acc:Q9SPK4]	26.06	25.02	26.35	44.8	43.51	43.48	128.72	134.67	132.23	47.14	47.27	48.38	87.27	90.03	91.11	58.19	61.96	62.54
AT1G08653		-	0	0	0	0	0	0	0	0	0	0	0	0	0	0	0	0	0	0
AT1G08657		-	9.04	0	2.3	10.96	0.01	1.21	0	0	0	0	0	0	0	0	0	0	0	0
AT1G08660	SIA1	Sialyltransferase-like protein 1 [Source:UniProtKB/Swiss-Prot;Acc:Q8VZJ0]	37.53	36.12	36.66	39.23	39.61	40.36	36.12	38.98	34.89	43.91	41.19	42.01	47.98	47.17	44.62	41.77	44.81	45.95
AT1G08663		-	0	0	0	0	2.18	0.65	0.62	0.91	0.58	1.47	0	0	0	1.22	0	0	2.55	0.81
AT1G08667		-	0	0	0	0	0	0	0	0	0	0	0	0	0	0	0	0	0	0
AT1G08670		ENTH/VHS family protein [Source:UniProtKB/TrEMBL;Acc:Q9FRR8]	0	0	0	0	0	0	0.06	0	0	0	0	0	0	0	0	0	0.12	0
AT1G08673		-	0	0	0	0	0	0	0	0	0	0	0	0	0	0	0	0	0	0
AT1G08677		-	0	0	0	0	0	0	0	0	0	0	0	0	0	0	0	0	0	0
AT1G08680	ZIGA4	ARF GAP-like zinc finger-containing protein ZIGA4 [Source:UniProtKB/TrEMBL;Acc:F4HXP0]	9.15	10.81	12.18	11.5	14.02	12.93	16.55	18.28	17.59	24.08	25.29	26.39	29.1	30.65	27.55	31.38	30.12	31.13
AT1G08683		-	0	0	0	0	0	0	0	0	0	0	0	0	0	0	0	0	0	0
AT1G08695	SCRL3	Putative defensin-like protein 228 [Source:UniProtKB/Swiss-Prot;Acc:P82622]	0	0	0	0	0	0	0	0	0	0	0	0	0	0	0	0	0.67	0
AT1G08697		-	0	0	0	0	0	0	0	0	0	0	0	0	0	0	0	0	0	0
AT1G08700	PS1	Presenilin [Source:UniProtKB/TrEMBL;Acc:Q0V7S4]	54.86	56.82	58.73	51.24	50.58	48.68	56.39	54.32	56.28	48.83	52.01	50.33	48.52	51.65	53.72	51.68	52.09	53.23
AT1G08703		-	0	0	0	0	0.55	0	0	0	0	0	0	0	0	0	0.55	0	0	1.08
AT1G08707		-	2.86	0	1.04	0	1.48	0	0.53	0.92	0	5.94	0	0	0	0.18	0	1.2	3.89	1.51
AT1G08710	SKIP24	F-box protein SKIP24 [Source:UniProtKB/Swiss-Prot;Acc:Q9CAZ0]	8.71	12.78	10.93	11	10.92	11.68	6.24	8.31	8.68	14.9	15.07	15.06	13.16	14.2	13.39	14.15	13.71	13.19
AT1G08713		-	0	0	0	0	0	0	0	0	0	0	0	0	0	0	0	0	0.35	0
AT1G08717		-	0	0	0	0	0	0	0	0	0	0	0	0	0	0	0	0	0	0
AT1G08720	EDR1	Serine/threonine-protein kinase EDR1 [Source:UniProtKB/Swiss-Prot;Acc:Q9FPR3]	7.66	9.31	9.88	9.51	9.45	8.43	11.04	11.1	10.8	9.04	9.83	9.54	12.7	12.01	12.64	13.97	13.81	13.79
AT1G08723		-	1.2	12.17	12.73	1.66	7.17	7.38	10.55	13.51	10.25	16.09	11.73	12.07	11.85	13.09	9.72	13.45	11.76	11.06
AT1G08727		-	6.38	3.09	3.62	15.27	5.66	1.51	4.18	0.27	0	1.88	1.72	3.42	0	0	0.13	4.39	0.1	0.17
AT1G08730	XI-C	Myosin-9 [Source:UniProtKB/Swiss-Prot;Acc:F4HXP9]	0.29	0.44	0.46	0.32	0.43	0.4	0.3	0.35	0.31	0.34	0.35	0.38	0.28	0.44	0.37	0.4	0.53	0.38
AT1G08733		-	0.17	0.39	1.27	0.79	0.69	0.37	0	0.43	0.16	1.4	0.34	0.19	0.39	0.66	0.37	0.38	0.72	0.51
AT1G08737		-	0	0	0	0	0	0	0	0	0	0	0	0	0	0	0	0	0	0
AT1G08743		-	0	0	0	2.14	0	0	0	0	0	0	7.85	2.42	0	0	0	0	0	0
AT1G08747		-	0	0	16.73	0	1.84	1.83	0.58	2.52	0	0	7.79	0	0	1.14	0.61	0	0	6.33
AT1G08750		Peptidase C13 family [Source:UniProtKB/TrEMBL;Acc:Q8GYI6]	17.28	15.3	14.87	15.81	16.72	15.95	13.8	14.01	12.14	16.23	17.08	15.87	17.15	17.84	15.59	18.99	17.58	17.69
AT1G08753		-	4.24	18.66	8.58	0	17.2	8.97	15.18	27.25	0	0	7.25	34.66	1.1	42	0	16.54	3.06	22
AT1G08757		-	0	0	0	0	0	0	0	0	0.07	0	0	0	0	0	0	0	0	0
AT1G08760		At1g08760 [Source:UniProtKB/TrEMBL;Acc:Q9FRR2]	17.84	20.44	20.82	14.96	17.92	16.47	18.21	18.06	17.53	24.68	26.51	27.81	26.68	27.73	28.77	28.37	27.3	27.88
AT1G08763		-	0	0	0	0	0	0	0	0	0	0	0	0	0	0	0	0	0	0
AT1G08767		-	0	0	0	0	0	0	0	0	0	0	0	0	0	0	0	0	0	0
AT1G08770	PRA1E	PRA1 family protein [Source:UniProtKB/TrEMBL;Acc:A0A178W4Z3]	31.19	30.1	27.56	33.99	31.23	29.84	30.63	33.51	31.99	30.88	35.53	31.47	28.99	30.86	33.31	28.13	30.71	29.79
AT1G08773		-	0	0	0	0	0	0	0	0	0	0	0	0	0	0	0	0	0	0
AT1G08777		-	0	0	0	0	0	0	0	0	0	0	0	0	0	0	0	0	0	0
AT1G08780	AIP3	Probable prefoldin subunit 4 [Source:UniProtKB/Swiss-Prot;Acc:Q9M4B5]	63.69	65.79	66.79	84.61	81.26	78.12	60.79	58.57	62.69	85.07	81.54	81.56	72.81	74.75	67.89	77.11	72.73	70.91
AT1G08783		-	0	0	0	0	0	0	0	0	0	0	0	0	0	0	0	0	0	1.07
AT1G08787		-	0	0	0	0	0	0	0	0	0	0	0	0	0	0	0	0	0	0
AT1G08790		1-phosphatidylinositol-4,5-bisphosphate phosphodiesterase epsilon-1, putative (DUF1685) [Source:UniProtKB/TrEMBL;Acc:Q9FRR0]	0	0	0	0	0	0	0	0	0	0	0	0	0	0	0	0	0	0
AT1G08793		-	0	0	0	0	0	0	0	0	0	0	0	0	0	0	0	0	0	0
AT1G08797		-	0	0	0	0	0	0	0	0	0	0	0	0	0	0	0	0	0	0
AT1G08800	MYOB1	Myosin-binding protein 1 [Source:UniProtKB/Swiss-Prot;Acc:F4HXQ7]	10.43	23.58	25.13	13.58	14.54	13.98	15.6	16.7	15.03	18.13	17.68	18.85	10.12	10.87	9.98	7.62	8.35	7.92
AT1G08803		-	0	0	0	0	0	0	0	0	0	0	0	0	11.24	0	0	0	0	0
AT1G08807		-	0	0	0	0	0	0	0	0	0	0	0	0	0	0	0	4.02	0	0
AT1G08810	MYB60	MYB60 [Source:UniProtKB/TrEMBL;Acc:A0A178WD25]	72.95	68.59	71.38	63.68	64.65	64.09	68.64	66.77	72.97	79.79	83.73	81.64	37.77	38.36	39.58	57.64	53.8	53.42
AT1G08813		-	0	0	0	0	0	0	0	0	0	0	0	0	0	0	0	0	0	0
AT1G08817		-	0	0	0	0	0	0	0	0	0	0	0	0	1.96	0	0	0	0	0
AT1G08820	PVA22	VAP27-2 [Source:UniProtKB/TrEMBL;Acc:A0A178WBB7]	64.32	76.09	78.81	77.68	77.96	78.41	65.62	66.07	65.48	86.78	79.12	85.26	82.85	84.88	84.56	89.93	85.41	83.4
AT1G08823		-	0	0	0	0	0	0	0	0	0	0	0	0	0	0	0	0	0	0
AT1G08827		-	0	0	0	0	0	0	0	0	0	0	0	0	0	0	0	0	0	0
AT1G08830	CSD1	Superoxide dismutase [Cu-Zn] 1 [Source:UniProtKB/Swiss-Prot;Acc:P24704]	1148.99	840.58	829.21	863.76	841.47	814.69	542.47	556.16	552.85	438.9	466.95	479.3	355.46	338	341.15	309.45	303.45	324.34
AT1G08833		-	0	0	0	0	0	0	0	0	0	0	0	0	0	0	0	0	0	0
AT1G08840	emb2411	DNA replication helicase, putative [Source:TAIR;Acc:AT1G08840]	1.69	2.84	3.08	2.86	2.78	3.44	2.89	3.84	3.23	3.88	3.99	4.21	4.46	5.1	4.46	4.01	4.18	4.42
AT1G08843		-	0	0	0	0	0	0	0	0	0	0	0	0	0	0	0	0	0	0
AT1G08845		Ribosomal L18p/L5e family protein [Source:UniProtKB/TrEMBL;Acc:F4HXR7]	18.26	11.51	11.71	20.13	15.03	13.3	10.5	11.55	13.29	21.16	21.32	18.88	14.2	12.35	12.79	9.38	12.28	11.24
AT1G08847		-	0	0	0	0	0	0	0	0	0	0	0	0	0	0	0	0	0	0
AT1G08853		-	175.09	110.25	123.47	29.94	19.28	22.71	0	0	0	9.51	11.72	11.82	3.76	1.1	4.09	6.52	3.48	4.77
AT1G08857		-	1.8	1.67	2.1	1.16	1.44	1.72	1.99	2.7	0.67	2.72	2.84	3.31	2.83	1.99	1.71	2.5	3.64	1.65
AT1G08860	BON3	Protein BONZAI 3 [Source:UniProtKB/Swiss-Prot;Acc:Q5XQC7]	12.39	14.39	13.47	17.19	20.12	17.72	12.64	13.59	13.34	22.33	22.39	21.91	28.85	29.75	28.76	32.08	30.38	30.98
AT1G08863		-	0	0	0	0	0	0	0	0	0	0	0	0	0	0	0	0	0	0
AT1G08867		-	0	0	0	0	0	0	0	0	0	0	0	0	0	0	0	0	0	0
AT1G08870		pre-tRNA [Source:TAIR;Acc:AT1G08870]	0	0	0	0	0	0	0	0	0	0	0	0	0	0	0	0	0	0
AT1G08877		-	0	0	0	0	0	0	0	0	0	0	0	0	0	0	0	0	0	0
AT1G08880	HTA5	Histone H2A [Source:UniProtKB/TrEMBL;Acc:A0A178W8H7]	183.78	142.72	142.84	181.42	177.05	176.54	200.67	200.98	187.73	118.37	130.41	110.97	121.48	121.03	116.15	99.7	92.69	103.13
AT1G08883		-	0	0	0	0	0	0	0	0	0	0	0	0	0	0	0	0	0	0
AT1G08887		-	0	0	0	0	0	0	0	0	0	0	0	0	0	0	0	0	0	0
AT1G08890	SUGTL4	Sugar transporter ERD6-like 1 [Source:UniProtKB/Swiss-Prot;Acc:Q9SCW7]	0.1	0.25	0.13	0.56	0.57	0.46	1.09	1.19	1.32	0.61	0.66	0.68	0.69	0.83	0.82	1.32	0.71	1.12
AT1G08893		-	0	0	0	0	0	0	0	0	0	0	0	0	0	0	0	0	0	0
AT1G08897		-	0	0	0	0	0	0	0	0	0	0	0	0	0	0	0	0	0	0
AT1G08900	SUGTL3	Sugar transporter ERD6-like 2 [Source:UniProtKB/Swiss-Prot;Acc:Q4F7G0]	0	0.03	0.08	0.1	0.11	0.08	0.23	0.07	0.15	0.11	0.05	0.11	0.11	0.06	0.06	0.03	0.03	0.03
AT1G08903		-	0	0	0	0	0	0	0	0	0	0	0	0	0	0	0	0	0	0
AT1G08907		-	0	0	0	0	0	0	0	0	0	0	0	0	0	0	0	0	0	0
AT1G08910		zinc ion binding;zinc ion binding [Source:TAIR;Acc:AT1G08910]	9.4	11.53	13.73	9.91	11.33	10.69	10.81	12.12	12.38	10.84	10.23	12.76	13.79	14.91	14.29	17.44	16.87	16.97
AT1G08913		-	0	0	0	0	0	0	0	0.23	0.17	0	0	0.21	0	0.35	0	0.61	0	0.18
AT1G08920	ESL1	ERD (early response to dehydration) six-like 1 [Source:TAIR;Acc:AT1G08920]	17.08	22.83	22.83	12.62	13.32	13.29	9.63	11.23	10.25	17.38	16.88	16.76	15.79	15.99	15.69	23	22.19	23.48
AT1G08923		-	0	0	1.88	1.82	0	0	0	0	0	0	0	0	0	0	0	0	0	0
AT1G08927		-	0	0	0	0	0	0	0	0	0	0	0	0	0	0	0	0	0	0
AT1G08930	ERD6	ERD6 [Source:UniProtKB/TrEMBL;Acc:A0A178W9Q9]	0.56	0.59	0.37	0.18	0.51	0.78	0.47	0.43	0.14	0.06	0.45	0.35	0.47	0.2	0.42	0.25	0.57	0.38
AT1G08933		-	0	0	0	0	0	0	0	0	0	0	0	0	0	0	0	0	0	0
AT1G08937		-	0	0	0	0	0	0	0	0	0	0	0	0	0	0	0	0	0	0
AT1G08940		Phosphoglycerate mutase-like protein AT74H [Source:UniProtKB/Swiss-Prot;Acc:O04035]	3.98	3.22	4.16	0.77	1.66	2.86	1.16	1.14	0.82	1.03	1.25	0.96	1.11	0.67	1.01	1.31	1.49	1.12
AT1G08947		-	0	0	0	0	0	0	0	0	0	0	0	0	0	0	0	0	0	0
AT1G08950		pre-tRNA [Source:TAIR;Acc:AT1G08950]	0	0	0	0	0	0	0	0	0	0	0	0	0	0	0	0	0	0
AT1G08953		-	0	0	0	0	0	0	0	0	0	0	0	0	0	0	0	0	0	0
AT1G08960	CCX5	CCX5 [Source:UniProtKB/TrEMBL;Acc:A0A178W3U3]	6.86	6.49	7.15	6.62	6.13	6.25	5.73	8.19	7.54	7.64	7.53	8.05	7.82	7.72	7.61	6.22	6.79	7.13
AT1G08963		-	0	0	0	0	0	0	0	0	0	0	0	0	0	0	0	0	0	0
AT1G08967		-	0	0	0	0	0	0	0	0	0	0	0	0	0	0	0	0	0	0
AT1G08970	NFYC9	Nuclear transcription factor Y subunit C-9 [Source:UniProtKB/Swiss-Prot;Acc:Q8L4B2]	113.86	103.67	105.74	129.38	112.68	112.7	109.84	108.43	102.86	118.22	123.91	122.43	130.95	127.27	129.16	134.34	138.09	133.34
AT1G08973		-	1.08	7.11	1.69	1.58	1.62	1.8	1.18	1.34	4.82	2.34	1.7	6.39	1.25	1.03	2.33	1.23	4.28	1.37
AT1G08977		-	0	0	0	0	0	0	0	0	0	0	0	0	0	0	0	0	0	0
AT1G08980	AMI1	Amidase 1 [Source:UniProtKB/Swiss-Prot;Acc:Q9FR37]	26.48	26.58	29.49	42.15	46.45	48.52	65.61	70.97	64.3	68.89	70.55	71.97	78.15	78.06	78.37	91.63	96.86	97.81
AT1G08983		-	0	0	0	0	0	0	0	0	0	0	0	0	0	0	0	0	0	0
AT1G08985		B3 domain-containing protein At1g08985 [Source:UniProtKB/Swiss-Prot;Acc:Q8GWU1]	89.17	74.94	72.61	184.18	152.94	153.94	88.47	84.27	78	100.25	108.61	87.33	100.31	96.61	75.35	80.99	80.35	70.95
AT1G08987		-	0	0	0	0	0	0	0	0	0	0	0	0	0	0	0	0	0	0
AT1G08990	GUX5	Putative UDP-glucuronate:xylan alpha-glucuronosyltransferase 5 [Source:UniProtKB/Swiss-Prot;Acc:F4HZC3]	0.67	0.96	1.27	1.91	1.69	2.55	1.03	1.62	1.41	2.37	2.34	2.55	2.01	1.77	1.82	5.35	4.8	5.35
AT1G08993		-	0	0	0	0	0	0	0	0	0	0	0	0	0	0	0	0	0	0
AT1G08997		-	0	0	0	0	0	0	0	0	0	0	0	0	0	0	0	0	0	0
AT1G09000	ANP1	Mitogen-activated protein kinase kinase kinase ANP1 [Source:UniProtKB/Swiss-Prot;Acc:O22040]	4.55	7.43	6.33	6.82	8.66	6.86	6.98	6.6	6.61	9.04	8.98	8.8	10.28	10.09	11.16	8.96	10.31	10.12
AT1G09003		-	0	0	0	0	0	0	0	1.05	0	0	0	0	0	0	0	0	0.87	0
AT1G09007		-	0	0	0	0	0	0	0	0	0	0	0	0	0	0	0	0.28	0	0
AT1G09010	EBM	Mannosylglycoprotein endo-beta-mannosidase [Source:UniProtKB/Swiss-Prot;Acc:Q75W54]	13.4	16.58	16.54	17.67	16.9	17.23	25.99	28.77	26.01	27.88	28.65	27.74	36.8	37.06	37.57	40.1	43.54	41.39
AT1G09013		-	0	0	0	0	0	0	0	0	0	0	0	0	0	0	0	0	0	0
AT1G09017		-	0	0	0	0	0	0	0	0	0	0	0	0	0	0	0	0	0	0
AT1G09020	SNF4	Sucrose nonfermenting 4-like protein [Source:UniProtKB/Swiss-Prot;Acc:Q944A6]	31.23	33.32	32.7	26.98	31.01	30.55	35.57	37.06	37.36	42.29	43.34	45.38	45.94	46.09	45.62	44.89	45.86	43.21
AT1G09023		-	0.23	0.31	0.36	0.59	0.46	0.49	0.81	0.9	1.04	0.41	0.19	0.2	0.28	0.25	0.28	0.27	0.37	0.22
AT1G09027		-	0	0	0	0	0	0	0	0	0	0	0	0	0	0	0	0	0	0
AT1G09030	NFYB4	Nuclear transcription factor Y subunit B-4 [Source:UniProtKB/Swiss-Prot;Acc:O04027]	0	0	0	0	0	0	0	0	0	0	0	0	0	0	0	0	0	0
AT1G09033		-	0	0	0	0	0	0	0	0	0	0	0	0	0	0	0	0	0	0
AT1G09037		-	0	0	0	0	0	0	0	0	0.19	0	0	0	0	0	0	0	0	0
AT1G09040		unknown protein; FUNCTIONS IN: molecular_function unknown; INVOLVED IN: biological_process unknown; LOCATED IN: membrane; EXPRESSED IN: leaf; BEST Arabidopsis thaliana protein match is: unknown protein (TAIR:AT1G09050.1); Ha. [Source:TAIR;Acc:AT1G09040]	2.66	3.79	4.19	3.42	3.36	3.1	3.07	3.71	3.12	5.96	4.94	5.68	5.81	5.42	5.59	6.42	6	5.35
AT1G09043		-	0	0	0	0	0	0	0	0	0	0	0	0	0	0	0	0	0	0
AT1G09047		-	0	0	0	0	0	0	0	0	0	0	0	0	0	0	0	0	0	0
AT1G09050		Arginine-glutamic acid dipeptide repeat protein [Source:UniProtKB/TrEMBL;Acc:Q8RX35]	1.96	2.22	2.54	1.78	1.66	1.93	1.89	2	2.05	2.52	2.45	2.35	2.37	2.52	2.22	2.14	2.19	2.46
AT1G09053		-	0	0	0	0	0	0	0	0	0	0	0	0	0	0	0	0	0	0
AT1G09057		-	0	0	0	0	0	0	0	0	0	0	0	0	0	0	0	0	0	0
AT1G09060		JmjC domain protein JMJ24 [Source:UniProtKB/TrEMBL;Acc:F4HZD1]	14.6	21.37	22	15.99	18.56	18.27	21.12	23.84	23.01	19.2	18.82	20.14	21.21	20.44	21.15	22.17	20.88	20.42
AT1G09063		-	0.82	0	0	0	0	0	0	0	0	0	0	0	0	0	0	0	0	0
AT1G09067		-	1.71	0	0	0	0	0	0	3.1	0	0	0	0	0	0	0	0	0	0
AT1G09070	SRC2	Protein SRC2 homolog [Source:UniProtKB/Swiss-Prot;Acc:O04023]	978.27	835.63	825.45	777.3	748.91	745.3	797.89	802.94	774.96	454.87	472.39	477.12	597.48	605.5	618.18	498.64	502.83	526.3
AT1G09073		-	0	0	0	0	0	0	0	0	0	0	0	0	0	0	0	0	0	0
AT1G09077		-	0	0	0	0	0	0	0	0	0	0	0	0	0	0	0	0	0	0
AT1G09080	MED37B	Probable mediator of RNA polymerase II transcription subunit 37b [Source:UniProtKB/Swiss-Prot;Acc:Q8H1B3]	0.15	0.39	0.22	0.46	0.26	0.14	2.42	2.02	2.44	0.18	0.34	0.26	0.55	0.77	0.81	1.09	0.88	0.84
AT1G09083		-	0	0	0	0	0	0	0	0	0	0	0	0	0	0	0	0	0	0
AT1G09087		-	0	0	0	0	0	0	0	0	0	0	0	0	0	0	0	0	0	0
AT1G09090	RBOHB	Respiratory burst oxidase homolog protein B [Source:UniProtKB/Swiss-Prot;Acc:Q9SBI0]	0	0.02	0.02	0	0.12	0.07	0.03	0	0	0.08	0.07	0.07	0.02	0.05	0.06	0	0	0.02
AT1G09097		-	0	0	0	0	0	0	0	0	0	0	0	0	0	0	0	0	0	0
AT1G09100	RPT5B	26S proteasome regulatory subunit 6A homolog B [Source:UniProtKB/Swiss-Prot;Acc:O04019]	57.77	64.29	61.17	57.54	58.34	58.47	44.8	44.98	40.49	63.35	60.25	63.02	58.05	57.23	58.55	55.42	59.74	59.31
AT1G09103		-	0	0	0	0	0	0	0	0	0	0	0	0	0	0	0	0	0	0
AT1G09107		-	0	0	0	0	0	0.58	0	0	0	0	0	0.66	0	0	0	0	0	0
AT1G09110		pre-tRNA [Source:TAIR;Acc:AT1G09110]	0	0	0	0	0	0	0	0	0	0	0	0	0	0	0	0	0	0
AT1G09113		-	0	0.46	0	0	0	0	0	0	0	0	0	0	0	0	0	0	0	0
AT1G09117		-	0	0	0	0	0	0	0	0	0	0	0	0	0	0	0	0	0	0
AT1G09123		-	0	0	0	0	0	0	0	0	0	0	0	0	0	0	0	0	0	0
AT1G09127		-	0	0	0	0.71	0	0.32	0.31	0	0	0	0	0	0	0	0	0	0	0
AT1G09130		ATP-dependent Clp protease proteolytic subunit [Source:UniProtKB/TrEMBL;Acc:F4HZE0]	78.71	67.91	66.25	97.42	96.39	94.28	99.68	101.19	94.08	72.06	69.4	69.89	70.35	71.94	67.92	66.54	68.08	75.44
AT1G09133		-	0	0	0	0	0	0	0	0	0	0	0	0	0	0	0	0	0	0
AT1G09137		-	0	0	0	0	0	0	0	0	0	0	0	0	0	0	0	0	0	0
AT1G09140	SR30	Serine/arginine-rich splicing factor SR30 [Source:UniProtKB/Swiss-Prot;Acc:Q9XFR5]	135.47	119.45	120.4	94.73	108.75	107.54	86.03	94.21	92.1	133.83	142.87	146.44	115.33	111.05	110.23	136.26	130.21	131.73
AT1G09143		-	0	0	0	0	0	0	0	0	0	0	0	0	0	0	0	0	0	0
AT1G09147		-	0	0	0	0	0	0	0	0	0	0	0	0	0	0	0	0	0	0
AT1G09150		Pseudouridine synthase and archaeosine transglycosylase (PUA) domain-containing protein [Source:UniProtKB/TrEMBL;Acc:Q8L7N2]	74.04	63.69	57.03	72.45	67.35	70.02	56.17	56.25	51.27	57.34	60.84	58.91	56.6	57.04	57.25	60.13	58.75	60.17
AT1G09153		-	0	0	0	0	0	0	0	0	0.22	0	0	0	0	0	0.25	0	0	0
AT1G09155	PP2B15	F-box protein PP2-B15 [Source:UniProtKB/Swiss-Prot;Acc:O80494]	14.51	15.99	16.77	19.05	18.28	20.89	16.63	15.94	15.42	17.76	22.48	21.42	20.39	21.05	21.24	27.71	30.08	29.36
AT1G09157	DMP8	Protein DMP8 [Source:UniProtKB/Swiss-Prot;Acc:O80493]	0.13	0.08	0	0.16	0.34	0	0.07	0	0.19	0.08	0.07	0.37	0.16	0.13	0.22	0.52	0.36	0.4
AT1G09160		Probable protein phosphatase 2C 5 [Source:UniProtKB/Swiss-Prot;Acc:O80492]	15.97	21.49	20.39	20.63	19.8	19.75	23.53	26.17	24.25	21.74	21.99	22.02	22.21	21.86	22.12	20.58	19.99	21.22
AT1G09163		-	4.77	0	0	0	0	5.02	0	0	0	0	0	0	0	0	0	0	0	0
AT1G09167		-	0	0	0.77	4.45	1.74	0	0	0	0	0	6.69	0	0	1.28	0	2.29	2.69	0.06
AT1G09170		P-loop nucleoside triphosphate hydrolases superfamily protein with CH (Calponin Homology) domain [Source:TAIR;Acc:AT1G09170]	0	0.01	0	0	0.01	0.02	0	0	0	0	0	0	0	0	0	0	0.01	0
AT1G09173		-	0	0	0	0	0	0	0	0	0	0	0	0	0	0	0	0	0	0
AT1G09176		T12M4.13 protein [Source:UniProtKB/TrEMBL;Acc:O80490]	0.09	0	0.18	0	0	0	0.09	0	0	0.1	0.09	0	0.31	0.25	0	0.2	0.28	0.09
AT1G09177		-	0	0	0	0	0	0	0	0	0	0	0	0	0	0	0	0	0	0
AT1G09180	ATSAR1	Putative GTP-binding protein, SAR1B [Source:UniProtKB/TrEMBL;Acc:O80489]	3.72	3.39	3.22	3.16	3.6	2.85	4.19	3.82	4.48	7.88	7.26	5.49	8.04	7.97	6.43	7.38	7.07	7.12
AT1G09183		-	0	0	0	0	0	0	0	0	0	3.07	2.58	0	2.99	2.59	0	0	0	0
AT1G09187		-	0	0	0	0	0	0	0	0	0	0	0	0	0	0	0	1.13	0	0
AT1G09190	PCMP-E70	Pentatricopeptide repeat-containing protein At1g09190 [Source:UniProtKB/Swiss-Prot;Acc:O80488]	4.15	4.83	4.51	4.78	4.96	4.57	4.49	4.55	4.33	7.7	7.24	8.32	5.36	5.1	5.54	4.91	4.46	3.64
AT1G09193		-	0.39	0	0.12	0.37	0.17	0.3	0.11	0.39	0.21	0.2	0.38	0.31	0	0.05	0	0	0.18	0.17
AT1G09195		FUNCTIONS IN: molecular_function unknown; INVOLVED IN: biological_process unknown; LOCATED IN: mitochondrion; CONTAINS InterPro DOMAIN/s: Metal-dependent phosphohydrolase, HD subdomain (InterPro:IPR006674), Ppx/GppA phosphatase (InterPro:IPR003695). [Source:TAIR;Acc:AT1G09195]	3.63	6.08	6.2	5.37	6.22	5.36	5.01	4.86	4.21	5.54	5.14	5.55	5.41	4.71	4.76	4.22	4.1	4.05
AT1G09197		-	0	0	0	0	0	0	0	0	0	0	0	0	0	0	0	0	0	0
AT1G09200	HTR2	Histone H3 [Source:UniProtKB/TrEMBL;Acc:Q0WRA9]	562.19	370.27	363.68	495.46	457.42	437.13	421.46	386.1	379.77	376.69	378.65	368.33	417.73	371.8	384.47	372.97	365.11	355.85
AT1G09207		-	9.07	2.17	2.96	12.91	9.32	6.09	10.72	4.44	13.11	2.04	0	4.24	5.61	2.32	3.19	0	2.85	2.7
AT1G09210	CRT2	Calreticulin-2 [Source:UniProtKB/Swiss-Prot;Acc:Q38858]	357.74	342.5	337.61	349.25	322.07	321.29	208.38	212.6	203.94	227.1	237.41	234.12	251.7	241.93	246.58	249.93	246.74	255.98
AT1G09213		-	9.51	9.25	2.33	3.87	11.21	11.03	10.05	16.05	14.92	6.62	0	1.67	6.03	3.62	1.04	2.33	1.97	2.14
AT1G09217		-	0	0.29	0.27	0	0	0.27	0	0	0	1.19	1	0	0.29	0	0	1.4	0	0
AT1G09220	PCMP-E25	Pentatricopeptide repeat-containing protein At1g09220, mitochondrial [Source:UniProtKB/Swiss-Prot;Acc:Q680Z7]	1.1	1.16	0.42	1.06	0.35	0.69	0.63	0.7	0.99	1.26	1.12	1.05	0.97	0.93	0.57	0.27	0.05	0.21
AT1G09223		-	0	0	0	0	0	0	0	0	2.94	0	3.23	0	0	0	0	0	0	0
AT1G09227		-	0	0	0	0	0	0	0	0	0	0	0	0	0	0	0	0	0	0
AT1G09230	SNRNP65	U11/U12 small nuclear ribonucleoprotein 65 kDa protein [Source:UniProtKB/Swiss-Prot;Acc:Q8RWV8]	13.16	12.11	12.59	13.27	14.73	13.99	11.82	12.81	13.89	11.71	12.07	12.36	13.75	13.56	12.95	12.23	14.02	12.62
AT1G09233		-	0	0	0	1.17	0.91	0	0.85	0	0	0	0.34	0	0	0	0	0	0	0
AT1G09237		-	0	0	0	0	0	0	0	0	0	0	0	0	0	0	0	0	0	0
AT1G09240	NAS3	Nicotianamine synthase 3 [Source:UniProtKB/Swiss-Prot;Acc:O80483]	0.18	0.2	0.18	0.37	0.38	0.27	1.39	1.9	1.63	0.62	0.48	0.38	3.11	3.11	2.76	3.72	3.35	3.31
AT1G09243		-	0	0	0	0	0	0	0	0	0	0	0	0	0.21	0	0	0	0	0
AT1G09245	SPH14	S-protein homolog 14 [Source:UniProtKB/Swiss-Prot;Acc:Q8GX02]	0	0	0	0	0	0	0	0	0	0	0	0	0	0	0	0	0	0
AT1G09247		-	13.02	3.59	13.87	24.17	13.41	21.28	10.11	10.5	16.09	12.68	15.06	9.18	2.88	15.86	11.7	9.17	13.61	2.72
AT1G09250	BHLH149	Transcription factor bHLH149 [Source:UniProtKB/Swiss-Prot;Acc:O80482]	1.36	0.7	0.68	0.83	0.54	0.51	2.26	2.25	2.95	1.01	1.15	0.6	1.17	1.08	0.85	1.21	1.33	0.96
AT1G09253		-	6.77	2.09	6.91	9.9	3.97	7.28	8.74	8.08	12.53	4.68	5.09	7.06	3.27	4.32	8.31	6.14	8.22	9.09
AT1G09257		-	0	0.57	0.15	0.16	0.38	0.38	0.28	0.15	0.17	0	0	0.28	0.73	0.21	0	0	0	0
AT1G09260		Chaperone DnaJ-domain superfamily protein [Source:UniProtKB/TrEMBL;Acc:O80481]	0	0	0	0	0.23	0	0	0	0	0	0	0	0	0.22	0	0	0	0
AT1G09263		-	0	0	0	0	0	0	0	0	0	0	0	0	0	0	0	0	0	0
AT1G09267		-	0	1.86	1.7	0	1.64	0	8.7	2.35	0	0	0	0	0	2.98	2.97	0	1.48	1.54
AT1G09270	IMPA4	Importin subunit alpha-4 [Source:UniProtKB/Swiss-Prot;Acc:O80480]	29.81	46.61	45.46	39.82	40	40.07	42.7	46.51	45.25	57.94	60.57	58.47	61.26	57.95	59.39	55.41	56.11	56.8
AT1G09273		-	0	0	0	0	0	0	0	0	0	0	0	0	0	0	0	0	0	0
AT1G09277		-	0	0	0	0	0	0	0	0	0	0	0	0	0	0	0	0	0	0
AT1G09280	STR6	Rhodanese-like domain-containing protein 6 [Source:UniProtKB/Swiss-Prot;Acc:Q94AC1]	14.38	13.52	13.41	13.06	13.28	12.76	13	14.47	15.2	16.59	15.47	17.17	16.11	18.87	16.2	14.33	15.5	15.17
AT1G09283		-	0	0	0	0	0	0	0	0	0	0	0	0	0	0	0	0	0	0
AT1G09287		-	31.8	25.61	25.98	45.83	54.49	48.31	39.61	41.47	43.58	11.47	14.2	10.43	25.14	26.26	27.77	8.27	15.45	16.38
AT1G09290		Uncharacterized protein At1g09290 (Fragment) [Source:UniProtKB/TrEMBL;Acc:Q7XBQ8]	18.61	18.52	18.2	18.4	17.55	17.93	16.5	16.87	15.42	19.46	20.31	19.45	18.35	19.89	16.19	15.67	16.26	17.36
AT1G09293		-	0.57	0	2.06	0	0	0	0.61	0	0	0	0	0	0	0.6	0	2.06	0.63	1.26
AT1G09297		-	0.13	0	0	0	0	0.31	0.29	0.39	0	0	1.2	0	0.98	0.65	0.64	0	0	0
AT1G09300	ICP55	Intermediate cleaving peptidase 55, mitochondrial [Source:UniProtKB/Swiss-Prot;Acc:F4HZG9]	10.03	9.18	10.09	7.83	9.06	7.87	7.66	5.87	6.42	8.91	8.56	8.59	5.87	6.61	6.07	6.6	5.24	5.86
AT1G09303		-	0	0	0	0	0	0	0	0	0	0	0	0	0	0	0	0	0	0
AT1G09307		-	0	0	0	0	0	0	0	0	0	0	0	0	0	0	0	0	0	0
AT1G09310		T31J12.3 protein [Source:UniProtKB/TrEMBL;Acc:Q9ZPZ4]	22.47	20.16	18.8	27.02	23.35	25.03	24.55	25.92	23.64	14.53	13.92	13.76	5.27	6.04	5.95	4.39	5.48	6.03
AT1G09313		-	0	0	0	0	0	0	0	0	0	0	0	0	0	0	0	0	0	0
AT1G09317		-	0	0	0	0	0	0	0	0	0	0	0	0.25	0	0	0	0	0	0
AT1G09320		Agenet domain-containing protein [Source:UniProtKB/TrEMBL;Acc:Q500V5]	8.77	9.5	8.64	10.51	10.01	10.29	9.5	8.89	9.11	11.67	11.55	12.98	11.55	10.67	12.14	10.68	9.18	10.66
AT1G09323		-	0	0	0	0	0	0	13.17	0.6	6.5	0	0	16.63	0	0	0	6.63	0	0
AT1G09327		-	0.73	0.62	0	1.94	2.86	0.17	2.21	1.28	2.45	4.16	1.12	2.68	4.45	0.37	4.97	0.98	1.62	1.67
AT1G09330	ECH	Golgi apparatus membrane protein-like protein ECHIDNA [Source:UniProtKB/Swiss-Prot;Acc:Q8LEK2]	69.67	62.5	55.93	68.56	65.22	63.05	59.22	53.09	59.34	68.79	71.05	63.29	70.9	65.32	68.64	67.86	69.81	66.46
AT1G09333		-	0	0	0	0	0	0	0	0	0	0	0	0	0	0	0	0	0	0
AT1G09337		-	0	0	0	0	0	0	0	0	0	0	0	0	0	0	0	0	0	0
AT1G09340	CRB	chloroplast RNA binding [Source:TAIR;Acc:AT1G09340]	15.75	13.68	12.38	12.72	12.19	12.12	18.35	18.68	19.07	9.57	11.13	11.92	11.19	11.59	10.35	10.86	10.34	10.42
AT1G09343		-	0	0	0	0	0	0	0	0	0	5.25	0	0	0	0	0	0	0	0
AT1G09350	GOLS3	Hexosyltransferase (Fragment) [Source:UniProtKB/TrEMBL;Acc:W8PVD7]	0.69	0.44	1.05	0.72	0.2	0.48	3.23	3.52	2.68	0	0.06	0	1.24	0.87	0.84	0.25	0.23	0.1
AT1G09353		-	0	0	0	0	0	0	0	0	0	0	0	0	0	0	0	0	0	0
AT1G09357		-	0	0	0	0	0	0	0	0	0	0	0	0	0	0	0	0	0	0
AT1G09360		F14J9.2 protein [Source:UniProtKB/TrEMBL;Acc:O80519]	6.31	5.06	3.58	1.84	0.92	2.41	0	0.16	0.12	0	0.13	0	0.45	0	0	0.15	0	0
AT1G09363		-	1.54	2.45	2.37	4.38	2.72	1.63	3.42	2.73	2.27	2.7	1.36	2.38	3.54	3.33	3.19	2.39	1.93	2.78
AT1G09367		-	0	3.29	3	5.72	0	12.47	2.49	12.77	2.41	0	0	0	15.33	2.65	7.53	2.86	12.74	5.35
AT1G09370		Plant invertase/pectin methylesterase inhibitor superfamily protein [Source:TAIR;Acc:AT1G09370]	503.63	393.15	392.93	285.87	264.11	277.63	89.22	78.53	85.98	74.61	73.08	69.38	36.8	30.15	32.97	28.85	29.6	26.75
AT1G09373		-	0	0	0	0	0	0	0	0	0	0	0	0	0	0	0	0	0	0
AT1G09377		-	0	0	0	0	0	0	0	0	0	0	0	0	0	0	0	0	0	0
AT1G09380		WAT1-related protein At1g09380 [Source:UniProtKB/Swiss-Prot;Acc:Q8GXB4]	61.85	63.19	58.24	110.18	108.15	109.4	105.04	111.36	112.86	128.07	123.43	129.29	506.2	507.61	504.71	1053.35	1050.43	1066.41
AT1G09383		-	0	0	2.83	2.67	0	0	0.86	3.9	0	0	0	0	0	0	0	0	0	0
AT1G09387		-	0	0	0	0	0	0	0	0	0	0	0	0	0	0	0	0	0	0
AT1G09390		GDSL esterase/lipase At1g09390 [Source:UniProtKB/Swiss-Prot;Acc:O80522]	38.49	36.27	35.29	21.92	24.62	26.53	9.39	9.36	10.82	7.82	7.35	7.59	3.17	3.67	4.5	5.69	6.7	4.78
AT1G09393		-	0	0	0	0	0	0	0	0	0	0	0	0	0	0	0	0	0	0
AT1G09397		-	0	0	0	0	0	0	0	0	0	0	0	0	0	0	0	0	0	0
AT1G09400		Putative 12-oxophytodienoate reductase-like protein 1 [Source:UniProtKB/Swiss-Prot;Acc:Q8GYA3]	1.08	1.11	1.28	0.88	0.62	0.69	0.31	0.77	0.53	1.21	0.56	0.71	1.04	1.19	1.14	2.08	1.56	1.17
AT1G09407		-	0	0	0	0	0	0	0	0	0	0	0	0	0	0	0	0	0	0
AT1G09410	PCMP-H18	Pentatricopeptide repeat-containing protein At1g09410, mitochondrial [Source:UniProtKB/Swiss-Prot;Acc:Q56XI1]	1.39	1.51	1.3	1.19	1.61	1.38	1.19	0.75	0.96	3.03	2.14	2.38	1.3	1.62	1.58	1.46	0.92	1.78
AT1G09415	NIMIN-3	Protein NIM1-INTERACTING 3 [Source:UniProtKB/Swiss-Prot;Acc:Q9FNZ4]	1.45	1.65	0.51	3.05	0.14	3.8	2.78	4.19	2.07	2.76	2.06	2.97	5.04	5.73	3.11	4.4	4.91	3.04
AT1G09417		-	0	0	0	0	0	0	0	0	0	0	0	0	0	0	0	0	0	0
AT1G09420	G6PD4	Glucose-6-phosphate 1-dehydrogenase [Source:UniProtKB/TrEMBL;Acc:F4I0Y8]	3.78	5.26	4.56	13.33	12.72	12.36	27.19	29.2	28.74	8.5	8.61	9.87	16.16	13.56	15.22	17.94	18.3	17.88
AT1G09421		other RNA [Source:TAIR;Acc:AT1G09421]	0	0	0	0	0	0	0	0	0.29	0	0	0	0	0	0	0	0	0.45
AT1G09423		-	0	0	0	0	18.29	0	0	0	5	0	0	0	0	0	0	0	0	0
AT1G09427		-	0.23	2.82	1.71	1.34	1.74	0.61	1.17	0.39	2.43	2.7	2.65	4.15	3.36	3.47	1.98	2.78	3.76	1.72
AT1G09430	ACLA-3	ATP-citrate synthase alpha chain protein 3 [Source:UniProtKB/Swiss-Prot;Acc:O80526]	47.08	50.22	49.48	44.68	47.98	47.51	45.65	46.13	46.23	56.03	54.82	55.58	50.29	49.84	51.91	51.53	50.31	52.44
AT1G09433		-	0	7.72	10.52	0	0	0	0	5.2	0	0	0	1.89	1.71	0	0	1.46	0	0
AT1G09437		-	0	0	0.58	0	0.55	0	0	0	0	0	0	0.62	0	0	0	0	0	0
AT1G09440		Protein kinase superfamily protein [Source:UniProtKB/TrEMBL;Acc:F4I0Z0]	33.75	34.02	36.35	23.72	24.33	25.11	12.25	11.6	11.42	12.26	10.7	11.54	7.46	6.75	7.64	5.37	7.02	6.23
AT1G09443		-	0	0	0	0	0	0	0	0	0	0	3.47	0	0	0	0	0	0	0.65
AT1G09447		-	11.83	11.64	13.18	12.61	13.29	12.83	2.93	4.54	4.79	6.47	2.55	5.55	1.69	2.84	1.16	1.22	2.27	1.12
AT1G09450	HASPIN	Serine/threonine-protein kinase haspin homolog [Source:UniProtKB/Swiss-Prot;Acc:O80528]	4.38	6.46	6.51	9.62	9.51	9.09	9.2	9.18	9.76	8.9	8.97	8.1	9.39	10.03	9.98	8.87	8.18	9.04
AT1G09453		-	4.18	2.68	3.34	3.18	4.01	3.64	2.88	2.75	2.28	1.01	3.17	1.01	1.11	1.38	0.51	0.74	1.51	1.92
AT1G09457		-	0	0	0	0	0	0	0	0	0	0	0	0	0	0	0	0	0	0
AT1G09460		Carbohydrate-binding X8 domain superfamily protein [Source:UniProtKB/TrEMBL;Acc:F4I0Z2]	5.34	8.06	7.17	6.04	6.41	6.36	11.54	15.51	13.17	5.17	4.25	5.27	6.75	5.77	5.52	5.68	8.27	6.34
AT1G09463		-	1.15	7.42	2.06	2.1	3.26	5.15	0	0.9	0	0	0.62	0.73	1.42	2.41	2.56	0.69	1.26	0.63
AT1G09467		-	0	0	0	0	0	0	0	0	0	0	0	0	0	0	0	0	0	0
AT1G09470	NEAP3	Nuclear envelope-associated protein 3 [Source:UniProtKB/Swiss-Prot;Acc:Q4PT37]	22.49	23.02	24.8	34.79	35.69	36.12	36.36	32.48	35.78	34.01	30.95	34.86	37.06	34.69	35.49	35.98	36.99	35.69
AT1G09473		-	0	0	0	0	0	0	0	0	0	0	0	0	0	0	0	0	0	0
AT1G09477		-	0	0	0	0	0	0	0	0	0	0	0	0	0.64	0	0	0	0	0
AT1G09480		NAD(P)-binding Rossmann-fold superfamily protein [Source:UniProtKB/TrEMBL;Acc:F4I0Z5]	1.73	0.85	1.36	1.05	0.76	1.2	1.47	1.54	1.82	1.89	1.33	1.39	1.56	1.37	1.57	1.55	0.85	1.42
AT1G09483	NEAP4	unknown protein; BEST Arabidopsis thaliana protein match is: unknown protein (TAIR:AT1G09470.1); Ha. [Source:TAIR;Acc:AT1G09483]	0	0	0	0.62	0	2.28	0	1.06	0.5	0.94	0.8	0	0	0	0.29	0.3	0	0
AT1G09487		-	0.56	0.11	0	0.76	0.43	0.65	2.38	2.86	2.41	0.83	0.56	0.5	0.77	2.2	2.56	1.12	6.89	3.76
AT1G09490		At1g09490/F14J9_15 [Source:UniProtKB/TrEMBL;Acc:O80532]	12.41	13.92	14.68	16.35	15.88	16.68	21.34	22.69	23.4	20.88	19.4	18.94	25.73	26.19	26.06	28.25	29.08	27.63
AT1G09493		-	0	0	0	0	0	0	0	0	0	0	0	0	0	0	0	0	0	0
AT1G09497		-	0	0	0	0	0	0	0	0	0	0	0	0	0	0	0	0	0	0
AT1G09500		At1g09500/F14J9_16 [Source:UniProtKB/TrEMBL;Acc:O80533]	16.16	14.88	12.75	28.72	37.54	33.46	30.15	26.52	25.93	96.45	100.98	100.09	150.12	150.89	145.65	185.82	194.43	191.01
AT1G09503		-	8.25	0	2.13	6.16	5.84	9.13	0	0	0	2.23	0	0	2.18	1.71	5.48	0	1.84	0
AT1G09507		-	0	0	0	0	4.53	0	0	0	1.87	0	0	0	0	2.07	0	1.12	0	0
AT1G09510		At1g09510 [Source:UniProtKB/TrEMBL;Acc:Q5PP57]	47.23	39.12	42.58	42	42.31	40.36	25.16	25.27	22.48	26.14	28.57	27.4	22.35	23.63	22.37	17.62	22.07	18.36
AT1G09513		-	0.97	0.62	0.57	1.76	0	0	1.54	1.48	0	0	0	0	0	0.5	1.08	0	0	0
AT1G09517		-	2.48	2.64	2.9	1.93	1.81	1.09	1.81	2.62	3.04	4.17	1.92	1.71	2.3	0.68	2.55	0.57	2.03	2.35
AT1G09520		At1g09520/F14J9_18 [Source:UniProtKB/TrEMBL;Acc:O80535]	12.54	11.47	11.32	16.28	16.71	14.81	18.17	16.96	16.77	26.39	19.82	24.46	19.41	20.25	18.89	21.84	19.99	24.15
AT1G09523		-	62.23	48.03	33.51	99	66.31	36.79	74.62	16.41	109.94	84.37	45.78	76.42	80.18	81.05	201.89	54.35	89.21	62.14
AT1G09527		-	0.42	0.5	0	0	0	0.23	1.76	0.85	0.2	1.8	0.87	0.5	1.51	2.52	0.94	1.7	1.6	1.54
AT1G09530	PIF3	Transcription factor PIF3 [Source:UniProtKB/Swiss-Prot;Acc:O80536]	0.79	0.72	0.82	1.06	1.27	1.23	3.22	3	3.38	2.81	2.46	2.84	3.92	3.02	3.22	3.49	3.8	3.48
AT1G09533		-	0	0	0	0	0	0	0	0	0	0	0	0	0	0	0	0	0	0
AT1G09537		-	0	2.54	2.82	1.02	0.22	1.89	1.99	2.28	3.08	4.39	3.48	5.76	7.08	3.6	3.78	7.08	7.81	4.87
AT1G09540	MYB61	MYB61 [Source:UniProtKB/TrEMBL;Acc:A0A178WLE4]	64.5	63.94	65.43	84.17	85.84	87.34	117.89	128.06	113.43	135.26	125.85	136.74	92.33	98.94	97.93	91.44	87.3	88.8
AT1G09543		-	2.47	2.61	2.31	2.06	1.99	2.53	2.5	2.49	2.41	2.36	3.05	1.98	2.63	3.73	3.15	3.03	3.28	2.76
AT1G09547		-	0	0	0	0	0	0	0	0	0	0	0	0	0	0	0	0	0	0
AT1G09550	PAE1	Pectin acetylesterase 1 [Source:UniProtKB/Swiss-Prot;Acc:F4I107]	11.2	12.78	10.18	3.66	3.89	3.56	121.92	126.93	113.06	221.15	228.32	214.17	253.09	254.63	237.55	191.79	199.8	204.67
AT1G09553		-	3.05	3.47	2.2	0.8	0.51	0.22	0.54	1.48	0.7	0.28	0.84	0.32	2.05	2.31	0.93	0	0.57	0.57
AT1G09557		-	0	2.97	1.3	6.39	0	0.82	0	0	0.66	0	0	0	0	0	0	5.86	0	0
AT1G09560	GLP4	Germin-like protein subfamily 2 member 1 [Source:UniProtKB/Swiss-Prot;Acc:P94014]	109.07	106.49	101.56	87.49	96.54	91.67	67.04	69.41	73.04	74.46	65.76	70.1	57.4	58.94	61.27	53.16	54.42	55.86
AT1G09563		-	0	0	0	0	0	0	0	0	0	0	0	0	0	0	0	0	0	0
AT1G09567		-	0	0	0	0	0	0	0	0	0	0	0	0	0	0	0	0	0	0
AT1G09570	PHYA	phytochrome A [Source:TAIR;Acc:AT1G09570]	18.15	23.74	24.91	16.1	16.93	17.29	19.91	20.77	18.58	24.16	24.89	23.31	23.28	24.49	24.12	21.45	22.25	21.77
AT1G09573		-	0	1.55	0.34	0.31	0.74	0.61	1.28	2.69	0.82	2.84	6.14	5.18	4.01	10.91	7.96	11	6.47	6.43
AT1G09575		Calcium uniporter protein 6, mitochondrial [Source:UniProtKB/Swiss-Prot;Acc:F4I111]	19.73	15.16	15.76	20.98	17.16	18.09	8.46	7.81	7.61	6.59	8.5	6.88	4.52	3.64	3.35	2.05	3.35	2.93
AT1G09577		-	0	0	0	0.12	0	0	0	0	0	0	0	0	0	0	0	0	0	0
AT1G09580		Transmembrane emp24 domain-containing protein p24delta3 [Source:UniProtKB/Swiss-Prot;Acc:Q6IDL4]	29.35	22.58	22.26	24.19	23.52	20.1	27.66	30.27	26.32	18.02	18.62	17.61	17.84	18.34	19.8	19.57	18.96	18.11
AT1G09583		-	0	0	0	0	0	0	0	0	0	0	0	0	0	0	0	0	0	0
AT1G09587		-	0	0	0	0	0	0	0	0	0	0	0	0	0	0	0	0	0	0
AT1G09590	RPL21A	60S ribosomal protein L21-1 [Source:UniProtKB/Swiss-Prot;Acc:Q43291]	619.4	528.45	521.4	654.59	631.3	630.21	501.76	497.77	524.3	541.03	586.92	592.49	484.16	467.94	476.97	440.35	471.31	470.43
AT1G09593		-	0	0	0	0	0	0	0	0	0	0	0	0	0	0	0	0	0	0
AT1G09597		-	0	0	0	0	0	0	0	0	0	0	0	0	0	0	0	0	0	0
AT1G09600		Probable serine/threonine-protein kinase At1g09600 [Source:UniProtKB/Swiss-Prot;Acc:F4I114]	0.57	0.72	0.94	0.68	1.27	1.49	2.1	2.41	2.32	0.66	1.03	0.95	0.89	0.98	1.19	0.78	0.94	0.72
AT1G09603		-	0	0	0	0	0	0.12	0	0	0	0.26	0	0	0	0	0	0.27	0.35	0
AT1G09607		-	1.19	0	0	0	0	0	0	0	0.6	0.76	0	0	0	0	0	0	0	0
AT1G09610	GXM1	GXM3 [Source:UniProtKB/TrEMBL;Acc:A0A178W7U8]	9.97	5.04	6.06	6.14	8.51	7.72	1.42	0.64	1.17	0.47	1.49	1.2	0.68	0.8	0.76	0.45	0.79	0.64
AT1G09613		-	0	0	0	0	0	0	0	0	0	0	0	0	0	0	0	0	0	0
AT1G09617		-	0.18	0	0	0.45	0.36	0.66	0.77	0.45	1.9	0.39	0.3	1.36	0	1.26	0.05	0	0.45	0.11
AT1G09620		Leucine--tRNA ligase, cytoplasmic [Source:UniProtKB/Swiss-Prot;Acc:F4I116]	36.47	55.27	57.32	45.71	46.29	48.2	54.19	58.84	57.14	79.79	81.53	83.54	73.6	75.01	75.71	64.56	63.42	63.67
AT1G09623		-	0.75	0	0	0	0.86	0	0.25	0	0	0	0.7	0	0	0	0	0	0	0
AT1G09625		Transmembrane protein [Source:UniProtKB/TrEMBL;Acc:Q1G3V0]	0	0	0	0	0	0	0	0	0	0	0	0	0	0	0	0	0	0
AT1G09627		-	0	0	0	0	0	0	0	0	0.03	0	0	0	0.11	0	0	0	0	0.09
AT1G09630	RABA2A	Ras-related protein RABA2a [Source:UniProtKB/Swiss-Prot;Acc:O04486]	33.51	29.7	31.11	43.79	44.61	35.71	46.45	42.68	40.42	50.04	41.24	45.38	57.39	54.52	55.75	60.36	55.5	53.26
AT1G09633		-	0	0	0	0	0	0	0	0	0	0	0	0	0	0	0	0	0	0
AT1G09637		-	0	0	0	0	0	0	0	0	0	0	0	0	0	0	0	0	0	3.67
AT1G09640		Probable elongation factor 1-gamma 1 [Source:UniProtKB/Swiss-Prot;Acc:O04487]	209.38	179.38	176.19	207.22	202.09	198.77	185.22	190.72	186.37	281.83	273.34	276.24	248.38	249.13	268.91	226.03	221.23	223.19
AT1G09645		At1g09645 [Source:UniProtKB/TrEMBL;Acc:Q6GKX8]	54.54	38.68	38.44	42.56	38.53	43.25	32.95	34.16	32.45	39.69	37.77	33.58	33.38	31.34	27.63	41.38	35.89	42.4
AT1G09647		-	0	0	0	0	0	7.59	0	0	0	15.32	1.02	0	2.61	15.32	0.16	0	2.51	0
AT1G09650		F-box/LRR-repeat/kelch-repeat protein At1g09650 [Source:UniProtKB/Swiss-Prot;Acc:O04488]	1.54	1.34	1.25	0.95	0.62	0.75	0.62	0.77	0.75	0.48	0.7	0.47	0.42	0.6	0.57	0.31	0.46	0.36
AT1G09653		-	2.41	2.34	3.6	0.73	0.69	1.35	0	1.89	1.21	0.76	2.6	0	2.99	2.53	1.34	4.32	3.96	0
AT1G09657		-	0	0	0	0	0.6	0	0	0	0	0	1.14	0	1.31	1.34	0	1.09	2.48	0.28
AT1G09660		KH domain-containing protein At1g09660/At1g09670 [Source:UniProtKB/Swiss-Prot;Acc:Q8GWR3]	38.38	37.07	36.75	57.37	59.35	59.87	56.44	54.97	56.05	93.36	102.15	99.94	107.61	110.04	110.22	100.29	105.97	100.94
AT1G09663		-	0.61	0	0.7	0	0	0.34	0.64	0	0.3	2.64	0.96	0.37	1.48	1.55	1.37	2.5	1.33	0.65
AT1G09665		Toll-Interleukin-Resistance (TIR) domain family protein [Source:UniProtKB/TrEMBL;Acc:Q3EDF9]	0	0	0	0.29	0	0	0	0	0	0	0.12	0.14	0.14	0	0.27	0.27	0.26	0
AT1G09667		-	0	0	0	0	0	0	0	0	0	0	0	0	0	0	0	0	0	0
AT1G09673		-	0	0	0	0	0	0	0	0	0	0	0	0	0	0	0	0	0	0
AT1G09677		-	0	1.06	0.16	0.53	0.92	1	0.47	0.75	0.87	0.54	1.22	2.06	2.11	1.03	0.66	0.51	1.46	0.77
AT1G09680		Putative pentatricopeptide repeat-containing protein At1g09680 [Source:UniProtKB/Swiss-Prot;Acc:O04491]	1.31	2.6	2.14	2.14	2.75	2.76	2.25	2.17	1.69	3.79	3.34	4.16	2.55	2.46	2.87	2.54	2	2.51
AT1G09683		-	0	0	0	0	0	0	0	0	0	0	0	0	0	0	0	0	0	0
AT1G09687		-	0	0	0	0	0	0	23.68	41.41	0	69.74	0	35.49	0	0	0	0	0	0
AT1G09690	RPL21A	60S ribosomal protein L21-1 [Source:UniProtKB/Swiss-Prot;Acc:Q43291]	758.92	550.9	532.53	655.58	612.84	611.08	595.43	611.79	605.75	511.29	530.12	525.98	475.82	460.12	476.49	429.88	456.58	464.62
AT1G09693		-	0	0	0	0	0	0	0	0	0	0	0	0	0	0	0	0	0	0
AT1G09697		-	0	0	0	0	0	0	0	0	0	0	0	0	0	0	0	0	0	0
AT1G09700	DRB1	Double-stranded RNA-binding protein 1 [Source:UniProtKB/Swiss-Prot;Acc:O04492]	38.14	35.36	33.4	39.12	33.67	32.28	25.68	35.21	30.46	41.4	35.01	39.61	35.82	37.25	36.21	28.24	31.56	28.94
AT1G09703		-	0	0	0	0	0	0	0	0	0	0	0	0	0	0	0	0.34	0	0
AT1G09710		Homeodomain-like superfamily protein [Source:UniProtKB/TrEMBL;Acc:F4I129]	11.1	10.65	10.64	10.65	10.57	10.18	6.66	8.12	7.68	9.35	10.89	10.09	10.13	10.75	11.41	9.85	9.93	9.76
AT1G09713		-	1.12	0.12	1.45	11.31	0.32	5.17	5.76	5.07	5.7	0.4	5.32	0	0	2.52	4.89	2.04	3.49	3.63
AT1G09717		-	0	0	0	0	0	0	0	0	0	0	0	0	0	0	0	0	0	0
AT1G09720	NET2B	Protein NETWORKED 2B [Source:UniProtKB/Swiss-Prot;Acc:F4I131]	0	0.02	0.03	0.02	0.05	0.03	0.02	0.09	0.01	0.04	0.02	0	0.04	0.05	0.07	0.04	0.08	0
[truncated: 30,835 more rows]
