# Supplementary material for: Transcriptome characteristics during cell wall formation of endosperm cellularization and embryo differentiation in Arabidopsis
Source: Front Plant Sci. 2022 Oct 3;13:998664. doi: 10.3389/fpls.2022.998664 (PMC9575994; doi:10.3389/fpls.2022.998664)
Supplement: Supplementary file 10 [file Table_4.xls]

## Sheet: sheet1
Supplementary Table 4 | Cluster I gene expression profiles of common 1102 DEGs in 4W vs 3W and 5W vs 4W of Arabidopsis
Gene_ID	Expression value of normalized expression
	W3	W4	W5
AT1G01020	-1.24073	0.0326265	1.20811
AT1G01620	-1.19832	-0.0512492	1.24957
AT1G01900	-1.20735	-0.0340862	1.24143
AT1G02310	-1.06892	-0.267441	1.33637
AT1G02390	-1.05845	-0.283036	1.34148
AT1G02810	-1.05012	-0.29527	1.34539
AT1G03920	-1.15768	-0.124603	1.28228
AT1G04077	-1.20023	-0.0476376	1.24787
AT1G04425	-1.35732	0.334755	1.02256
AT1G04660	-1.24968	0.0515004	1.19818
AT1G04680	-1.12734	-0.175811	1.30315
AT1G04920	-1.22859	0.00773219	1.22086
AT1G05370	-1.31494	0.206681	1.10825
AT1G05420	-1.0688	-0.267629	1.33643
AT1G06000	-0.988869	-0.381124	1.36999
AT1G06180	-0.993494	-0.374876	1.36837
AT1G06310	-1.18487	-0.0761969	1.26106
AT1G07007	-1.21085	-0.027335	1.23818
AT1G07430	-1.10496	-0.211915	1.31687
AT1G08230	-1.20694	-0.0348736	1.24181
AT1G08890	-1.13457	-0.163855	1.29842
AT1G09420	-1.24274	0.0368103	1.20592
AT1G09950	-1.26573	0.0865562	1.17917
AT1G10880	-1.22722	0.00497303	1.22225
AT1G10990	-1.18337	-0.0789299	1.2623
AT1G11170	-1.10974	-0.204305	1.31405
AT1G11450	-0.938649	-0.446756	1.38541
AT1G11730	-1.09384	-0.229383	1.32322
AT1G12080	-1.36264	0.353587	1.00905
AT1G13100	-0.826012	-0.581116	1.40713
AT1G13590	-1.23432	0.0193713	1.21494
AT1G13635	-0.932821	-0.454124	1.38694
AT1G14260	-1.12645	-0.177276	1.30372
AT1G14440	-1.05882	-0.282485	1.34131
AT1G14700	-1.12145	-0.185433	1.30689
AT1G14750	-1.07383	-0.260053	1.33389
AT1G14760	-1.09162	-0.232824	1.32445
AT1G15160	-1.24807	0.0480746	1.2
AT1G17060	-1.28947	0.141805	1.14767
AT1G17140	-1.25068	0.0536415	1.19704
AT1G17810	-0.943858	-0.440128	1.38399
AT1G18100	-0.856646	-0.546161	1.40281
AT1G18370	-1.31691	0.212025	1.10489
AT1G19200	-1.1747	-0.0946118	1.26931
AT1G19450	-1.21961	-0.0102142	1.22982
AT1G19640	-1.20604	-0.0365898	1.24263
AT1G20900	-1.11106	-0.202197	1.31326
AT1G21140	-1.30694	0.185577	1.12137
AT1G22430	-0.919108	-0.471268	1.39038
AT1G22490	-1.13352	-0.165599	1.29912
AT1G22570	-1.09981	-0.220035	1.31985
AT1G22650	-1.08807	-0.238325	1.32639
AT1G23000	-1.15378	-0.13135	1.28513
AT1G23200	-1.31152	0.197579	1.11394
AT1G23380	-1.13109	-0.169632	1.30072
AT1G23510	-1.15686	-0.126022	1.28288
AT1G23560	-1.12394	-0.181373	1.30532
AT1G26680	-0.97043	-0.405683	1.37611
AT1G26760	-1.27081	0.0980192	1.17279
AT1G27220	-1.3185	0.216342	1.10216
AT1G27710	-1.14428	-0.147566	1.29184
AT1G28130	-1.07926	-0.251817	1.33108
AT1G28170	-1.18359	-0.0785249	1.26212
AT1G28290	-1.187	-0.0722817	1.25928
AT1G28360	-1.135	-0.163132	1.29814
AT1G28590	-1.24831	0.0485686	1.19974
AT1G28600	-1.25693	0.0671421	1.18979
AT1G28640	-1.01944	-0.339137	1.35858
AT1G28700	-1.25578	0.0646294	1.19115
AT1G30320	-1.21206	-0.024984	1.23705
AT1G30900	-0.875396	-0.524207	1.3996
AT1G31310	-1.04743	-0.29919	1.34662
AT1G31335	-1.21676	-0.0158092	1.23257
AT1G32190	-1.3066	0.184691	1.12191
AT1G32470	-1.14591	-0.144795	1.29071
AT1G33790	-0.905493	-0.488031	1.39352
AT1G33800	-1.15296	-0.132747	1.28571
AT1G34060	-0.998073	-0.368654	1.36673
AT1G35625	-1.17806	-0.0885569	1.26662
AT1G35630	-1.30293	0.175263	1.12767
AT1G36060	-1.09345	-0.229976	1.32343
AT1G43800	-0.867414	-0.533607	1.40102
AT1G47655	-1.31122	0.196766	1.11445
AT1G47740	-1.17634	-0.0916559	1.268
AT1G47840	-1.12975	-0.171833	1.30159
AT1G47980	-1.07231	-0.262352	1.33466
AT1G48260	-1.20758	-0.0336339	1.24122
AT1G49475	-1.16444	-0.112803	1.27724
AT1G49570	-0.871456	-0.528856	1.40031
AT1G49720	-1.20468	-0.0391968	1.24387
AT1G49870	-1.2611	0.0762851	1.18482
AT1G50650	-1.24892	0.0498723	1.19905
AT1G52690	-1.04601	-0.301251	1.34726
AT1G53520	-1.22099	-0.00748314	1.22847
AT1G54575	-1.19229	-0.0625206	1.25481
AT1G57590	-1.1169	-0.192812	1.30971
AT1G62060	-1.1725	-0.0985423	1.27104
AT1G62080	-1.16517	-0.111518	1.27669
AT1G63100	-1.30296	0.175332	1.12763
AT1G64710	-1.15851	-0.123164	1.28167
AT1G64800	-1.22766	0.0058461	1.22181
AT1G65090	-1.10433	-0.212905	1.31724
AT1G65710	-1.31329	0.202267	1.11102
AT1G66430	-1.25817	0.0698296	1.18834
AT1G67810	-1.33347	0.258821	1.07465
AT1G67920	-1.20663	-0.0354665	1.24209
AT1G68120	-1.11701	-0.192636	1.30965
AT1G68480	-1.17666	-0.0910891	1.26775
AT1G68780	-1.10367	-0.213958	1.31763
AT1G68795	-0.969366	-0.407084	1.37645
AT1G69610	-1.16198	-0.11712	1.2791
AT1G69870	-1.01512	-0.345172	1.36029
AT1G70830	-1.32686	0.239657	1.0872
AT1G71120	-1.11297	-0.199146	1.31211
AT1G71160	-0.9976	-0.369299	1.3669
AT1G72430	-1.25178	0.055984	1.19579
AT1G74550	-1.02685	-0.328701	1.35555
AT1G75120	-1.19519	-0.0571193	1.25231
AT1G75240	-1.01451	-0.346017	1.36053
AT1G75500	-0.998172	-0.36852	1.36669
AT1G75640	-1.04036	-0.309418	1.34978
AT1G76310	-1.21792	-0.0135451	1.23146
AT1G76470	-1.11604	-0.194206	1.31024
AT1G76790	-1.32531	0.235266	1.09005
AT1G77100	-0.946276	-0.437038	1.38331
AT1G77110	-1.07526	-0.257896	1.33316
AT1G77580	-1.3049	0.180299	1.1246
AT1G78430	-1.21894	-0.0115374	1.23047
AT1G78865	-1.26762	0.0908064	1.17681
AT1G79360	-1.21793	-0.0135157	1.23145
AT1G80370	-1.17121	-0.100843	1.27205
AT2G01580	-1.26767	0.090916	1.17675
AT2G01770	-1.07745	-0.254582	1.33203
AT2G01940	-0.907885	-0.485104	1.39299
AT2G03370	-1.16058	-0.119562	1.28014
AT2G04205	-1.28172	0.123273	1.15845
AT2G04215	-1.32945	0.247094	1.08236
AT2G06200	-1.1639	-0.113754	1.27765
AT2G08085	-1.07378	-0.260128	1.33391
AT2G08090	-1.1577	-0.124577	1.28227
AT2G10260	-1.22808	0.0067035	1.22138
AT2G10535	-1.38976	0.46813	0.921634
AT2G14378	-1.27199	0.100713	1.17128
AT2G14690	-1.09167	-0.232751	1.32442
AT2G14935	-1.04192	-0.307176	1.34909
AT2G15042	-0.942639	-0.441683	1.38432
AT2G15050	-1.16889	-0.104957	1.27385
AT2G15440	-1.31184	0.198432	1.11341
AT2G16580	-1.26348	0.0815458	1.18193
AT2G16595	-1.14997	-0.137873	1.28785
AT2G16750	-1.21428	-0.0206727	1.23495
AT2G16850	-1.1227	-0.183406	1.3061
AT2G17620	-1.1914	-0.064166	1.25557
AT2G17770	-0.992858	-0.375737	1.3686
AT2G18350	-1.15479	-0.129605	1.28439
AT2G18590	-0.87342	-0.526542	1.39996
AT2G18620	-1.06864	-0.267866	1.33651
AT2G18670	-1.12981	-0.171749	1.30155
AT2G19090	-1.14207	-0.151295	1.29336
AT2G20570	-0.893707	-0.502339	1.39605
AT2G20750	-0.941422	-0.443232	1.38465
AT2G21050	-1.11778	-0.191401	1.30918
AT2G22000	-1.12953	-0.1722	1.30173
AT2G22030	-1.00633	-0.357346	1.36367
AT2G22840	-1.1981	-0.0516511	1.24975
AT2G22900	-1.14654	-0.143719	1.29026
AT2G23060	-1.14945	-0.138771	1.28822
AT2G23190	-1.26043	0.0747971	1.18563
AT2G23410	-1.14864	-0.140158	1.28879
AT2G23570	-1.23499	0.0207461	1.21424
AT2G23580	-1.15192	-0.134545	1.28646
AT2G23760	-0.989357	-0.380467	1.36982
AT2G24700	-1.0539	-0.28974	1.34364
AT2G24950	-1.21946	-0.0105062	1.22996
AT2G25450	-1.26857	0.0929354	1.17563
AT2G25940	-1.15048	-0.13701	1.28749
AT2G26070	-1.23824	0.0274535	1.21079
AT2G26180	-1.29862	0.164352	1.13427
AT2G27380	-1.00256	-0.362523	1.36508
AT2G27690	-1.27254	0.101959	1.17058
AT2G28610	-1.16774	-0.106993	1.27473
AT2G28620	-1.26322	0.0809708	1.18225
AT2G29370	-1.26831	0.0923682	1.17595
AT2G29460	-1.06361	-0.275384	1.33899
AT2G30590	-1.29665	0.159434	1.13722
AT2G30680	-1.09762	-0.223475	1.32109
AT2G31160	-1.08877	-0.237245	1.32601
AT2G32010	-1.11595	-0.194349	1.3103
AT2G32460	-1.2846	0.1301	1.1545
AT2G32990	-1.29471	0.154616	1.14009
AT2G33233	-1.11811	-0.190865	1.30897
AT2G33830	-1.24811	0.0481547	1.19996
AT2G33880	-1.20769	-0.0334168	1.24111
AT2G34020	-0.960563	-0.4186	1.37916
AT2G34315	-1.09969	-0.220223	1.31992
AT2G34670	-1.19505	-0.0573795	1.25243
AT2G34700	-1.19201	-0.0630369	1.25505
AT2G34710	-1.22141	-0.0066405	1.22805
AT2G34790	-1.04823	-0.298025	1.34625
AT2G34960	-1.16815	-0.106274	1.27442
AT2G35640	-1.07662	-0.255831	1.33245
AT2G36400	-1.27538	0.108486	1.16689
AT2G36640	-1.27573	0.109294	1.16643
AT2G36760	-1.21641	-0.016503	1.23291
AT2G36950	-1.20141	-0.045411	1.24682
AT2G37100	-1.07845	-0.253052	1.3315
AT2G38870	-1.29463	0.154413	1.14022
AT2G38920	-1.1148	-0.1962	1.311
AT2G39700	-1.17294	-0.0977596	1.27069
AT2G40220	-1.10054	-0.218886	1.31943
AT2G40230	-1.04307	-0.305504	1.34858
AT2G40890	-1.11601	-0.194252	1.31026
AT2G41070	-1.04589	-0.30143	1.34732
AT2G41370	-1.16789	-0.106728	1.27462
AT2G41800	-0.935882	-0.45026	1.38614
AT2G42150	-1.07227	-0.262408	1.33468
AT2G42430	-1.20297	-0.0424379	1.24541
AT2G42800	-1.11474	-0.196303	1.31104
AT2G43050	-1.19872	-0.0504797	1.2492
AT2G43520	-1.09826	-0.22247	1.32073
AT2G45050	-1.10738	-0.208078	1.31545
AT2G45190	-1.21293	-0.0232997	1.23623
AT2G45420	-1.29727	0.160958	1.13631
AT2G45430	-1.31346	0.202726	1.11073
AT2G45480	-1.19677	-0.054157	1.25092
AT2G45610	-1.16542	-0.111078	1.2765
AT2G45720	-1.23872	0.028447	1.21027
AT2G45830	-1.24712	0.0460417	1.20107
AT2G45850	-1.0722	-0.262517	1.33472
AT2G46450	-0.967145	-0.41	1.37715
AT2G46530	-1.19187	-0.0632882	1.25516
AT2G47430	-1.11357	-0.198179	1.31175
AT2G47670	-1.04671	-0.300227	1.34694
AT3G01295	-1.31872	0.21693	1.10179
AT3G01570	-0.992285	-0.376514	1.3688
AT3G01710	-1.13291	-0.166604	1.29952
AT3G02590	-1.30192	0.172685	1.12924
AT3G02640	-1.35225	0.317559	1.03469
AT3G04070	-1.23913	0.0292911	1.20984
AT3G04630	-1.12619	-0.177704	1.30389
AT3G05690	-0.971753	-0.40394	1.37569
AT3G05890	-1.24452	0.0405641	1.20396
AT3G05936	-1.23268	0.0160218	1.21666
AT3G05980	-1.06561	-0.272402	1.33801
AT3G06035	-1.12654	-0.177125	1.30366
AT3G06868	-1.20527	-0.0380538	1.24333
AT3G07255	-1.30512	0.180854	1.12426
AT3G07350	-1.23467	0.0201064	1.21457
AT3G07830	-0.923114	-0.466288	1.3894
AT3G08900	-1.26668	0.0886983	1.17798
AT3G09032	-1.20221	-0.0438937	1.2461
AT3G09035	-1.2826	0.125358	1.15724
AT3G09540	-1.08331	-0.245643	1.32895
AT3G10310	-1.217	-0.0153426	1.23234
AT3G11180	-1.27753	0.113468	1.16406
AT3G12970	-1.07785	-0.253966	1.33182
AT3G13175	-1.17482	-0.0943792	1.2692
AT3G13960	-1.09817	-0.222609	1.32078
AT3G14310	-1.16334	-0.114737	1.27808
AT3G14760	-1.05424	-0.28923	1.34347
AT3G15550	-1.29425	0.153473	1.14078
AT3G16490	-1.27061	0.0975742	1.17304
AT3G16770	-1.17836	-0.0880292	1.26638
AT3G17580	-1.19704	-0.0536526	1.25069
AT3G17640	-1.04511	-0.302551	1.34766
AT3G17680	-1.14566	-0.14522	1.29088
AT3G17840	-1.16015	-0.120303	1.28046
AT3G18010	-0.900024	-0.494693	1.39472
AT3G18180	-1.22327	-0.00294608	1.22622
AT3G18960	-1.20094	-0.0462891	1.24723
AT3G19050	-1.2699	0.0959574	1.17394
AT3G20015	-1.16209	-0.116928	1.27902
AT3G20150	-1.2411	0.0333849	1.20771
AT3G21550	-1.06853	-0.268032	1.33656
AT3G21690	-1.27758	0.113581	1.164
AT3G21700	-1.15757	-0.124797	1.28237
AT3G21730	-1.15231	-0.133877	1.28618
AT3G21755	-0.982198	-0.390074	1.37227
AT3G21760	-1.28313	0.12661	1.15652
AT3G22550	-1.23904	0.0291146	1.20993
AT3G22560	-1.12165	-0.185116	1.30677
AT3G22800	-0.99919	-0.367132	1.36632
AT3G23090	-1.32978	0.248032	1.08175
AT3G23167	-1.23295	0.0165858	1.21637
AT3G23290	-1.13878	-0.15683	1.29561
AT3G24240	-1.00012	-0.365863	1.36598
AT3G24650	-1.08257	-0.246771	1.32934
AT3G25640	-1.16396	-0.113653	1.27761
AT3G26520	-1.11986	-0.188018	1.30788
AT3G26742	-1.24698	0.0457501	1.20123
AT3G26790	-1.22558	0.00166508	1.22391
AT3G26820	-1.14446	-0.147259	1.29172
AT3G27690	-1.20719	-0.03438	1.24157
AT3G28100	-1.04495	-0.302795	1.34774
AT3G28155	-1.23047	0.0115285	1.21894
AT3G29300	-1.11139	-0.201682	1.31307
AT3G29770	-1.31584	0.209123	1.10672
AT3G31900	-1.00477	-0.359493	1.36426
AT3G32280	-1.26475	0.0843625	1.18038
AT3G43600	-1.07632	-0.256294	1.33261
AT3G44150	-1.20186	-0.0445503	1.24641
AT3G44460	-1.21813	-0.0131168	1.23125
AT3G44830	-0.976502	-0.397657	1.37416
AT3G45010	-1.26435	0.0834775	1.18087
AT3G45130	-1.00047	-0.365389	1.36585
AT3G45610	-1.32909	0.246052	1.08304
AT3G45780	-0.96018	-0.419099	1.37928
AT3G46240	-0.899382	-0.495472	1.39485
AT3G46700	-1.08681	-0.240266	1.32707
AT3G46890	-1.16375	-0.114021	1.27777
AT3G47190	-1.35099	0.313393	1.0376
AT3G47950	-1.20593	-0.0367975	1.24273
AT3G48200	-1.00794	-0.35513	1.36307
AT3G48700	-1.02422	-0.332426	1.35664
AT3G48740	-0.945157	-0.438469	1.38363
AT3G49300	-1.25955	0.072862	1.18669
AT3G50230	-1.1764	-0.0915555	1.26795
AT3G50970	-1.1078	-0.207397	1.3152
AT3G50980	-1.27231	0.101432	1.17087
AT3G50990	-1.29364	0.151966	1.14167
AT3G51420	-1.31958	0.219298	1.10028
AT3G51570	-1.06785	-0.269056	1.3369
AT3G51930	-1.18927	-0.0680997	1.25737
AT3G52550	-0.88123	-0.517286	1.39852
AT3G52910	-1.34973	0.309247	1.04048
AT3G52970	-1.20183	-0.0446021	1.24644
AT3G53190	-1.30682	0.185248	1.12157
AT3G53210	-1.23649	0.0238295	1.21266
AT3G53232	-1.10804	-0.207022	1.31506
AT3G54150	-1.10882	-0.205787	1.3146
AT3G54260	-1.11313	-0.198881	1.31201
AT3G54320	-1.29145	0.146603	1.14485
AT3G54940	-1.13716	-0.159536	1.2967
AT3G55470	-1.21661	-0.0161152	1.23272
AT3G55560	-1.15555	-0.12829	1.28384
AT3G55660	-1.2209	-0.00765137	1.22855
AT3G56100	-1.20323	-0.0419536	1.24518
AT3G56260	-1.12882	-0.173381	1.3022
AT3G57500	-1.03886	-0.311578	1.35044
AT3G58060	-0.897443	-0.497824	1.39527
AT3G58650	-1.30273	0.174736	1.12799
AT3G58740	-1.21513	-0.0190139	1.23414
AT3G59850	-0.977467	-0.396376	1.37384
AT3G60130	-1.27463	0.106751	1.16788
AT3G61150	-1.21356	-0.0220807	1.23564
AT3G61930	-1.04078	-0.30881	1.34959
AT3G63360	-1.24167	0.0345725	1.20709
AT4G00180	-1.06328	-0.275876	1.33915
AT4G00460	-1.1844	-0.0770543	1.26145
AT4G00480	-0.920045	-0.470106	1.39015
AT4G01140	-1.10962	-0.204506	1.31412
AT4G01160	-1.24894	0.0499111	1.19903
AT4G02800	-1.16741	-0.107581	1.27499
AT4G03100	-1.25301	0.0586272	1.19438
AT4G03270	-1.31047	0.194793	1.11567
AT4G04460	-1.3173	0.213075	1.10423
AT4G04605	-0.921488	-0.468311	1.3898
AT4G08530	-1.28895	0.140529	1.14842
AT4G09240	-1.26087	0.0757703	1.1851
AT4G09760	-1.18237	-0.0807598	1.26313
AT4G10490	-1.2587	0.0710031	1.1877
AT4G11040	-0.957616	-0.422429	1.38005
AT4G11180	-1.12408	-0.181153	1.30523
AT4G11300	-1.29248	0.149136	1.14335
AT4G11330	-1.20605	-0.0365649	1.24262
AT4G11350	-1.17653	-0.0913232	1.26785
AT4G11550	-1.03426	-0.318177	1.35243
AT4G11720	-1.2048	-0.0389675	1.24376
AT4G12300	-1.15719	-0.125461	1.28265
AT4G12730	-1.20886	-0.0311661	1.24003
AT4G14330	-1.27017	0.0965646	1.1736
AT4G14690	-1.20711	-0.0345481	1.24165
AT4G14695	-1.26382	0.0822951	1.18152
AT4G14770	-1.13657	-0.160519	1.29709
AT4G15240	-1.19793	-0.0519717	1.2499
AT4G15390	-1.29597	0.157722	1.13824
AT4G15490	-1.13806	-0.158025	1.29609
AT4G15620	-1.14056	-0.153828	1.29439
AT4G17340	-1.1897	-0.0673156	1.25701
AT4G18700	-1.19021	-0.0663693	1.25658
AT4G21680	-1.23314	0.016974	1.21617
AT4G21690	-1.17335	-0.0970212	1.27037
AT4G22010	-1.04363	-0.3047	1.34833
AT4G22250	-1.27832	0.115312	1.16301
AT4G22790	-1.18868	-0.0691871	1.25787
AT4G23750	-1.26296	0.0803979	1.18257
AT4G24015	-1.19367	-0.0599493	1.25362
AT4G24275	-1.33096	0.251456	1.0795
AT4G24415	-1.09011	-0.235161	1.32527
AT4G24760	-1.16859	-0.105485	1.27408
AT4G24790	-1.20037	-0.047381	1.24775
AT4G25140	-1.09697	-0.224485	1.32146
AT4G25433	-1.24477	0.0410883	1.20368
AT4G25750	-1.19329	-0.0606587	1.25395
AT4G26050	-0.850047	-0.553785	1.40383
AT4G26200	-1.1193	-0.188928	1.30823
AT4G27160	-0.925879	-0.462837	1.38872
AT4G27550	-1.1553	-0.128727	1.28402
AT4G27810	-1.26541	0.0858431	1.17956
AT4G28130	-1.13649	-0.16065	1.29714
AT4G28365	-1.35902	0.340681	1.01834
AT4G28380	-1.0571	-0.285028	1.34213
AT4G28405	-1.32261	0.227688	1.09492
AT4G28520	-0.844305	-0.560375	1.40468
AT4G29150	-1.32042	0.221609	1.09881
AT4G29230	-1.09298	-0.23072	1.3237
AT4G30290	-1.05917	-0.281971	1.34114
AT4G30850	-1.20593	-0.0368075	1.24273
AT4G30880	-1.07904	-0.252161	1.3312
AT4G31330	-1.27414	0.105639	1.1685
AT4G31680	-1.23006	0.0107103	1.21935
AT4G31710	-1.07195	-0.262896	1.33484
AT4G32000	-1.09242	-0.231577	1.324
AT4G32490	-1.31916	0.21816	1.101
AT4G33600	-1.16426	-0.113114	1.27738
AT4G34610	-1.18842	-0.0696676	1.25809
AT4G34950	-1.23216	0.0149621	1.2172
AT4G35720	-1.03042	-0.323645	1.35406
AT4G35730	-1.31857	0.216529	1.10204
AT4G36220	-1.21258	-0.0239788	1.23656
AT4G36700	-1.26614	0.0874914	1.17865
AT4G36850	-1.2611	0.0762827	1.18482
AT4G36930	-1.17053	-0.102047	1.27258
AT4G37150	-0.967324	-0.409766	1.37709
AT4G37750	-1.2615	0.0771499	1.18435
AT4G39500	-1.27675	0.111665	1.16509
AT4G39760	-1.2221	-0.00527273	1.22737
AT5G01040	-1.22644	0.00339197	1.22305
AT5G01075	-1.22386	-0.00176649	1.22563
AT5G01100	-0.995054	-0.372761	1.36781
AT5G01370	-1.29257	0.149351	1.14322
AT5G02440	-1.22959	0.00974488	1.21984
AT5G03350	-1.11468	-0.196389	1.31107
AT5G03680	-1.04922	-0.296581	1.3458
AT5G03790	-1.23518	0.0211393	1.21404
AT5G03840	-1.12132	-0.185656	1.30697
AT5G03860	-1.06389	-0.274958	1.33885
AT5G03870	-1.20695	-0.0348545	1.2418
AT5G05860	-1.11719	-0.192341	1.30953
AT5G05940	-1.29917	0.165717	1.13345
AT5G07190	-0.971847	-0.403815	1.37566
AT5G07200	-1.27351	0.104176	1.16933
AT5G07460	-1.30207	0.17307	1.129
AT5G07500	-1.1313	-0.16928	1.30058
AT5G07520	-0.927697	-0.460561	1.38826
AT5G08000	-1.13206	-0.168019	1.30008
AT5G09210	-1.14262	-0.150372	1.29299
AT5G09970	-1.1152	-0.195563	1.31076
AT5G10140	-1.08271	-0.246553	1.32927
AT5G10280	-1.12903	-0.173033	1.30206
AT5G10310	-1.11693	-0.192762	1.3097
AT5G11570	-1.04696	-0.299871	1.34683
AT5G12050	-1.17057	-0.101967	1.27254
AT5G12420	-1.29676	0.159702	1.13706
AT5G12460	-1.26186	0.0779645	1.1839
AT5G13170	-1.31197	0.198758	1.11321
AT5G13790	-1.17807	-0.0885411	1.26661
AT5G14070	-1.08498	-0.243082	1.32806
AT5G14180	-1.23402	0.0187743	1.21525
AT5G14750	-1.07652	-0.255988	1.33251
AT5G15180	-1.00618	-0.357549	1.36373
AT5G15530	-1.17513	-0.0938269	1.26896
AT5G16230	-0.987478	-0.382997	1.37047
AT5G17350	-1.21699	-0.0153633	1.23235
AT5G17490	-1.09484	-0.227813	1.32266
AT5G17700	-1.06105	-0.279181	1.34023
AT5G17800	-1.35267	0.318981	1.03369
AT5G19140	-1.14681	-0.143271	1.29008
AT5G19220	-1.02505	-0.331253	1.3563
AT5G19520	-0.879857	-0.518919	1.39878
AT5G20635	-1.31304	0.201612	1.11143
AT5G20790	-0.960903	-0.418158	1.37906
AT5G20950	-1.19144	-0.0640836	1.25553
AT5G22470	-0.875176	-0.524467	1.39964
AT5G22810	-1.13598	-0.161506	1.29749
AT5G24090	-0.951514	-0.430315	1.38183
AT5G24130	-1.23746	0.0258302	1.21163
AT5G24900	-1.28523	0.131596	1.15363
AT5G24920	-1.27724	0.112795	1.16445
AT5G25330	-1.19363	-0.0600239	1.25365
AT5G26730	-0.972752	-0.40262	1.37537
AT5G27200	-1.34325	0.28852	1.05473
AT5G27320	-1.21103	-0.0269753	1.23801
AT5G27350	-0.953795	-0.427374	1.38117
AT5G27420	-1.02909	-0.325539	1.35462
AT5G36100	-1.29777	0.162216	1.13555
AT5G38005	-1.15093	-0.136232	1.28717
AT5G38070	-1.33015	0.249109	1.08104
AT5G38160	-1.33238	0.255602	1.07677
AT5G38170	-1.33326	0.258206	1.07506
AT5G38700	-1.24869	0.0493815	1.19931
AT5G39240	-1.00861	-0.354205	1.36281
AT5G39610	-1.2406	0.0323575	1.20825
AT5G39760	-0.97689	-0.397143	1.37403
AT5G39860	-1.0513	-0.293539	1.34484
AT5G40030	-1.17407	-0.0957388	1.2698
AT5G40360	-1.283	0.126292	1.15671
AT5G40420	-1.03284	-0.320204	1.35304
AT5G44120	-0.823115	-0.584365	1.40748
AT5G44190	-1.20838	-0.0321044	1.24048
AT5G44610	-1.26723	0.089922	1.17731
AT5G45070	-1.12708	-0.176229	1.30331
AT5G46880	-1.18712	-0.0720623	1.25918
AT5G47670	-1.17297	-0.0976949	1.27067
AT5G48100	-1.19877	-0.0503992	1.24917
AT5G48310	-1.23467	0.0201078	1.21457
AT5G48360	-1.08093	-0.24928	1.33021
AT5G49360	-1.16545	-0.111022	1.27648
AT5G49700	-1.20486	-0.0388417	1.2437
AT5G49730	-1.26675	0.0888569	1.1779
AT5G49850	-1.12222	-0.184179	1.3064
AT5G50300	-0.927528	-0.460773	1.3883
AT5G50450	-1.25265	0.0578565	1.19479
AT5G50750	-1.30298	0.175373	1.1276
AT5G50770	-1.22198	-0.00550355	1.22749
AT5G50890	-1.24448	0.0404772	1.204
AT5G51210	-1.25025	0.052705	1.19754
AT5G51560	-1.09489	-0.227742	1.32263
AT5G51600	-1.28466	0.130245	1.15442
AT5G52100	-1.00639	-0.357255	1.36365
AT5G52500	-0.904375	-0.489396	1.39377
AT5G52830	-1.08575	-0.241886	1.32764
AT5G53030	-1.16483	-0.112115	1.27695
AT5G53290	-1.21554	-0.0182038	1.23375
AT5G54250	-1.31461	0.205804	1.1088
AT5G54570	-1.21655	-0.0162311	1.23278
AT5G55090	-1.02005	-0.338287	1.35833
AT5G55360	-1.13507	-0.163029	1.29809
AT5G55410	-1.19597	-0.0556485	1.25162
AT5G55730	-1.07439	-0.259218	1.3336
AT5G56120	-1.30614	0.183504	1.12264
AT5G56410	-1.2095	-0.0299394	1.23944
AT5G56790	-1.20124	-0.0457245	1.24697
AT5G56860	-1.09206	-0.232147	1.3242
AT5G56870	-1.18056	-0.0840439	1.2646
AT5G56970	-1.22569	0.00190235	1.22379
AT5G57123	-1.23848	0.0279457	1.21053
AT5G57260	-1.1682	-0.106172	1.27437
AT5G57390	-1.09746	-0.223722	1.32118
AT5G58630	-1.2604	0.0747385	1.18566
AT5G58770	-1.24317	0.037714	1.20545
AT5G59170	-1.2302	0.0109861	1.21921
AT5G59590	-1.31307	0.201679	1.11139
AT5G59845	-1.27542	0.108582	1.16684
AT5G60450	-1.07095	-0.264405	1.33535
AT5G62150	-1.19799	-0.0518598	1.24985
AT5G62630	-1.2755	0.10877	1.16673
AT5G62800	-1.05935	-0.281701	1.34105
AT5G62850	-1.04562	-0.30182	1.34744
AT5G63225	-1.28366	0.127873	1.15579
AT5G63240	-1.33514	0.263775	1.07137
AT5G64530	-0.930592	-0.456929	1.38752
AT5G65410	-1.16707	-0.108177	1.27524
AT5G65590	-1.21713	-0.0150894	1.23222
AT5G65830	-1.11712	-0.192457	1.30958
AT5G66020	-1.09201	-0.232226	1.32423
AT5G67450	-1.10176	-0.216977	1.31873
AT5G67550	-1.29361	0.151894	1.14171
