# Supplementary material for: Transcriptome characteristics during cell wall formation of endosperm cellularization and embryo differentiation in Arabidopsis
Source: Front Plant Sci. 2022 Oct 3;13:998664. doi: 10.3389/fpls.2022.998664 (PMC9575994; doi:10.3389/fpls.2022.998664)
Supplement: Supplementary file 11 [file Table_5.xls]

## Sheet: sheet1
Supplementary Table 5 | Cluster II gene expression profiles of common 1102 DEGs in 4W vs 3W and 5W vs 4W of Arabidopsis
Gene_ID	Expression values of normalized expression
	W5	W4	W3
AT2G44540	-1.22402	-0.00145103	1.22547
AT4G32380	-1.2212	-0.00705454	1.22826
AT4G33840	-1.22028	-0.00888596	1.22916
AT1G52030	-1.29845	0.163928	1.13453
AT5G09730	-1.32538	0.235451	1.08993
AT5G46810	-1.31886	0.217319	1.10154
AT1G52400	-1.21365	-0.0219016	1.23555
AT1G02190	-1.18852	-0.0694854	1.25801
AT2G44550	-1.04278	-0.305923	1.34871
AT3G57270	-1.35778	0.33636	1.02142
AT5G39280	-1.34941	0.308221	1.04119
AT1G72970	-1.23772	0.0263784	1.21134
AT5G39300	-1.3522	0.317409	1.03479
AT4G33830	-1.24875	0.0495208	1.19923
AT1G52040	-1.23642	0.023686	1.21273
AT4G21630	-1.22779	0.00611708	1.22167
AT4G32170	-1.34013	0.278849	1.06128
AT2G37720	-1.2585	0.070559	1.18794
AT1G44130	-1.32924	0.246468	1.08277
AT3G02670	-1.3437	0.289938	1.05376
AT3G25420	-1.27382	0.104891	1.16893
AT2G45110	-1.27821	0.115044	1.16316
AT2G39330	-0.892532	-0.503755	1.39629
AT1G10190	-1.37408	0.397354	0.97673
AT5G39260	-1.38155	0.429081	0.952471
AT5G47350	-1.35809	0.337425	1.02066
AT5G58820	-1.17733	-0.0898696	1.2672
AT1G73610	-1.26917	0.0942942	1.17487
AT2G19500	-1.34856	0.305457	1.04311
AT4G15050	-1.36992	0.380824	0.989092
AT1G14455	-1.32217	0.226472	1.0957
AT1G75900	-1.32535	0.235386	1.08997
AT4G20800	-1.35954	0.342518	1.01702
AT3G21500	-1.30072	0.169637	1.13108
AT4G02300	-1.04149	-0.307787	1.34928
AT1G22015	-1.26403	0.082765	1.18126
AT3G17150	-1.2958	0.157306	1.13849
AT5G40680	-1.31985	0.220045	1.09981
AT1G34170	-1.05537	-0.287571	1.34294
AT4G15053	-1.34202	0.284685	1.05733
AT1G51460	-1.25304	0.058691	1.19434
AT1G10010	-1.22627	0.00305319	1.22322
AT2G39640	-1.30184	0.172463	1.12937
AT1G70600	-1.10396	-0.213502	1.31746
AT2G02490	-1.37729	0.410627	0.966668
AT4G16165	-1.34764	0.302473	1.04517
AT2G35250	-1.35389	0.323042	1.03084
AT1G16390	-1.27509	0.10783	1.16726
AT1G64830	-1.23221	0.0150766	1.21714
AT3G49900	-1.11499	-0.195897	1.31089
AT1G76090	-1.17919	-0.0865283	1.26571
AT5G12270	-1.21533	-0.0186159	1.23395
AT4G32105	-1.29223	0.148508	1.14372
AT3G61820	-1.22542	0.00135627	1.22407
AT5G25410	-1.34179	0.28397	1.05782
AT3G19350	-1.22168	-0.00610541	1.22779
AT5G58830	-1.33935	0.276472	1.06288
AT1G54020	-1.24117	0.0335294	1.20764
AT4G39650	-1.32927	0.246565	1.0827
AT1G56620	-1.35269	0.319039	1.03365
AT4G09153	-1.3585	0.338875	1.01963
AT3G12700	-1.2782	0.115028	1.16317
AT3G46840	-1.21328	-0.0226159	1.2359
AT3G10595	-1.35009	0.310433	1.03966
AT5G46960	-1.38785	0.458542	0.929308
AT4G23080	-1.11956	-0.188514	1.30807
AT2G32690	-1.28635	0.134288	1.15207
AT3G17152	-1.19052	-0.0658045	1.25632
AT2G38255	-1.38167	0.429594	0.952073
AT5G58840	-1.33991	0.278184	1.06172
AT2G20208	-1.34631	0.29821	1.0481
AT1G22210	-1.03249	-0.320692	1.35319
AT1G24400	-1.12578	-0.178374	1.30415
AT3G01324	-1.35846	0.338714	1.01974
AT5G26220	-1.16193	-0.117199	1.27913
AT3G53950	-1.18407	-0.077651	1.26172
AT3G19010	-1.03779	-0.313123	1.35091
AT3G24065	-1.22927	0.00909415	1.22017
AT3G14850	-1.22686	0.00424725	1.22262
AT3G47340	-1.2633	0.0811459	1.18215
AT1G56415	-1.36278	0.354083	1.00869
AT4G27860	-1.18682	-0.0726232	1.25944
AT1G24062	-1.32207	0.226171	1.0959
AT2G20465	-1.33787	0.271976	1.06589
AT1G09880	-0.975114	-0.399496	1.37461
AT5G12960	-1.1948	-0.0578395	1.25264
AT5G11540	-1.20633	-0.0360389	1.24237
AT3G11920	-1.23416	0.0190605	1.2151
AT4G03945	-1.3084	0.189371	1.11903
AT3G27999	-1.34778	0.302929	1.04485
AT3G59030	-1.37569	0.403939	0.971753
AT1G65770	-1.1713	-0.100667	1.27197
AT4G15160	-1.21413	-0.0209624	1.23509
AT2G06850	-1.22783	0.00618991	1.22164
AT3G28490	-1.30419	0.178479	1.12571
AT4G29610	-1.15586	-0.127753	1.28361
AT1G29600	-1.19257	-0.0619903	1.25456
AT5G63140	-1.21292	-0.0233094	1.23623
AT1G04445	-1.24079	0.0327556	1.20804
AT3G17227	-1.22104	-0.00738381	1.22842
AT1G13680	-1.29637	0.158728	1.13764
AT2G30810	-1.3831	0.436047	0.947051
AT1G61688	-1.32825	0.243625	1.08462
AT5G44020	-1.24158	0.0343941	1.20719
AT4G17505	-1.29508	0.155528	1.13955
AT3G03828	-1.31833	0.215885	1.10245
AT3G17230	-1.35647	0.331832	1.02464
AT2G41090	-1.13653	-0.160587	1.29712
AT3G61250	-1.28684	0.135454	1.15139
AT1G55600	-1.02564	-0.330411	1.35605
AT4G00400	-1.30587	0.182788	1.12308
AT5G65390	-1.18206	-0.0813108	1.26337
AT1G12180	-1.26702	0.089456	1.17756
AT5G12060	-1.3329	0.257139	1.07576
AT5G25620	-1.11435	-0.196933	1.31128
AT3G55677	-1.28774	0.137623	1.15012
AT2G44460	-1.21365	-0.0218877	1.23554
AT5G54225	-1.3608	0.346989	1.01381
AT3G27425	-1.38641	0.451526	0.934881
AT2G05117	-1.34302	0.287798	1.05522
AT3G57800	-1.20364	-0.0411755	1.24481
AT3G05460	-1.37179	0.388153	0.983635
AT1G78710	-1.2951	0.155588	1.13952
AT1G74430	-1.29402	0.15292	1.1411
AT5G09360	-1.34414	0.29133	1.05281
AT5G46950	-1.38219	0.431924	0.950263
AT5G38930	-1.26859	0.0929958	1.1756
AT5G26650	-0.970165	-0.406031	1.3762
AT5G32619	-1.38695	0.45413	0.932816
AT4G30070	-1.17042	-0.102244	1.27266
AT1G31250	-1.37068	0.383786	0.986891
AT4G16600	-1.21819	-0.0130145	1.2312
AT4G15735	-1.37571	0.404021	0.971691
AT1G08853	-1.33287	0.257059	1.07581
AT1G72260	-1.20439	-0.0397419	1.24413
AT3G04720	-1.30431	0.178789	1.12552
AT2G44560	-1.17739	-0.0897782	1.26716
AT3G12610	-1.18659	-0.0730443	1.25963
AT2G02493	-1.30147	0.171548	1.12993
AT4G19905	-1.39311	0.485764	0.907346
AT1G35180	-1.32903	0.245879	1.08315
AT5G06500	-1.30506	0.180699	1.12436
AT4G39000	-1.31956	0.219254	1.10031
AT2G12480	-1.1874	-0.0715473	1.25895
AT5G63087	-1.36498	0.362137	1.00284
AT2G03955	-1.3882	0.460285	0.927918
AT1G56233	-1.39504	0.496512	0.898525
AT5G14130	-1.32963	0.247612	1.08202
AT2G31953	-1.35649	0.3319	1.02459
AT2G30090	-1.01078	-0.3512	1.36198
AT1G72140	-1.13274	-0.166892	1.29963
AT1G35540	-1.1096	-0.204541	1.31414
AT2G21465	-1.39762	0.511756	0.885866
AT2G41940	-1.30119	0.170819	1.13037
AT3G50720	-1.17241	-0.0987019	1.27111
AT5G20740	-1.31113	0.196548	1.11459
AT1G44090	-1.32728	0.240863	1.08642
AT5G56490	-1.04132	-0.308033	1.34936
AT1G35240	-1.20185	-0.0445655	1.24642
AT1G26960	-1.24684	0.0454662	1.20138
AT4G32110	-1.37536	0.402562	0.972797
AT2G32770	-1.28248	0.125062	1.15742
AT4G23350	-1.06875	-0.267703	1.33645
AT2G19220	-1.07569	-0.257244	1.33293
AT2G37540	-1.20304	-0.0423181	1.24536
AT1G03870	-1.29049	0.144267	1.14622
AT5G61600	-1.27414	0.105627	1.16851
AT5G58782	-1.11553	-0.195022	1.31055
AT1G63057	-1.34448	0.292412	1.05207
AT4G30064	-1.30007	0.167993	1.13208
AT5G15000	-1.35695	0.333496	1.02346
AT5G19580	-1.15809	-0.123898	1.28198
AT5G41040	-1.35248	0.318331	1.03415
AT3G03910	-1.27395	0.105185	1.16876
AT1G34310	-1.24146	0.0341453	1.20732
AT4G37800	-1.15403	-0.130912	1.28494
AT2G36724	-1.38174	0.429907	0.95183
AT3G23530	-1.18828	-0.0699278	1.25821
AT2G34070	-1.25289	0.0583776	1.19451
AT1G66852	-1.09232	-0.231747	1.32406
AT2G43670	-1.37549	0.403121	0.972373
AT4G29285	-1.38653	0.452122	0.934408
AT1G01570	-1.06372	-0.275218	1.33894
AT1G24020	-1.37302	0.393079	0.979945
AT1G72940	-0.997071	-0.37002	1.36709
AT2G25185	-1.3765	0.40729	0.969209
AT4G35480	-1.2309	0.0124038	1.2185
AT3G24510	-1.38466	0.443249	0.941409
AT1G35520	-1.21175	-0.0255916	1.23734
AT1G14890	-1.25599	0.0650859	1.1909
AT1G73550	-1.28689	0.13558	1.15131
AT2G15340	-1.34886	0.306422	1.04244
AT4G25900	-1.25692	0.0671133	1.18981
AT5G07850	-1.35859	0.339185	1.01941
AT3G55110	-1.35691	0.333348	1.02356
AT1G54445	-1.39411	0.491281	0.902829
AT1G11593	-1.31172	0.198102	1.11362
AT5G35900	-1.30785	0.187941	1.11991
AT1G34410	-1.101	-0.218169	1.31917
AT5G48905	-1.29576	0.157207	1.13855
AT5G42640	-1.07167	-0.263318	1.33499
AT1G02640	-1.26452	0.0838567	1.18066
AT1G34575	-1.22853	0.00759793	1.22093
AT1G28450	-0.934166	-0.452428	1.38659
AT3G55665	-1.18975	-0.0672151	1.25697
AT1G64107	-1.2415	0.0342254	1.20727
AT4G10210	-0.96512	-0.412654	1.37777
AT4G29283	-1.38379	0.43921	0.944577
AT3G29570	-1.22871	0.00797036	1.22074
AT3G01327	-1.39642	0.504564	0.891861
AT3G28250	-1.37376	0.396034	0.977724
AT5G03760	-1.21071	-0.0275961	1.23831
AT1G78460	-1.09404	-0.22907	1.32311
AT5G25040	-1.20806	-0.0327232	1.24078
AT5G44063	-1.27085	0.0981152	1.17274
AT2G04046	-1.36162	0.349922	1.0117
AT4G13955	-1.37407	0.397288	0.97678
AT5G44830	-1.1266	-0.177021	1.30362
AT2G44925	-1.28996	0.142982	1.14698
AT3G09990	-1.22598	0.00247758	1.2235
AT1G64870	-1.34403	0.290974	1.05305
AT2G28680	-1.08867	-0.23739	1.32606
AT5G18000	-1.24022	0.0315592	1.20866
AT3G55252	-1.2742	0.105769	1.16843
AT1G58055	-1.39291	0.484682	0.90823
AT5G14150	-1.16657	-0.109049	1.27562
AT2G23970	-1.3542	0.324107	1.03009
AT1G13650	-1.29743	0.161364	1.13606
AT5G39700	-1.19493	-0.0575993	1.25253
AT1G22420	-1.08771	-0.238867	1.32658
AT4G25810	-1.27653	0.111155	1.16538
AT3G49580	-1.0436	-0.304742	1.34834
AT4G15040	-1.27135	0.0992422	1.1721
AT1G49290	-1.01993	-0.338445	1.35838
AT1G67270	-1.08583	-0.241766	1.3276
AT2G33750	-1.23298	0.0166359	1.21634
AT2G24693	-1.38704	0.454588	0.932452
AT2G02498	-1.40324	0.549313	0.853923
AT1G32180	-1.09575	-0.2264	1.32215
AT1G20740	-1.22759	0.00571066	1.22188
AT5G04047	-1.33859	0.27416	1.06443
AT4G39030	-1.19148	-0.0640208	1.2555
AT3G15950	-1.19194	-0.0631671	1.25511
AT2G25305	-1.23559	0.0219864	1.2136
AT1G67330	-1.31265	0.200573	1.11208
AT2G34150	-1.22898	0.00852308	1.22046
AT3G01328	-1.39287	0.484471	0.908402
AT2G47010	-1.30669	0.184917	1.12177
AT1G34650	-1.19866	-0.0506069	1.24926
AT2G21730	-1.09715	-0.224213	1.32136
AT2G03933	-1.34873	0.305989	1.04274
AT3G01322	-1.36899	0.377236	0.991751
AT5G55131	-1.3721	0.389405	0.982698
AT1G63522	-1.33327	0.258231	1.07504
AT4G04090	-1.33171	0.253662	1.07805
AT2G06090	-1.37966	0.420749	0.95891
AT1G59500	-1.18283	-0.0799081	1.26274
AT3G21450	-1.03839	-0.312261	1.35065
AT5G27960	-1.09619	-0.225719	1.3219
AT1G67560	-1.21441	-0.0204132	1.23482
AT1G64940	-1.33173	0.253722	1.07801
AT2G44290	-0.988119	-0.382134	1.37025
AT4G32080	-1.33985	0.278004	1.06185
AT1G34390	-1.25443	0.0617046	1.19273
AT3G29152	-1.30155	0.171749	1.1298
AT2G04925	-1.3961	0.502661	0.89344
AT3G60140	-1.3512	0.314069	1.03713
AT2G38110	-1.11947	-0.188665	1.30813
AT3G13400	-1.0108	-0.351165	1.36197
AT1G03170	-1.25099	0.0542916	1.1967
AT1G02820	-1.01118	-0.35064	1.36182
AT5G52610	-1.13412	-0.164608	1.29872
AT1G23420	-1.35336	0.321276	1.03208
AT1G66870	-1.14377	-0.148425	1.29219
AT3G24790	-1.14745	-0.142187	1.28963
AT1G68800	-1.18281	-0.0799444	1.26276
AT3G23970	-1.25061	0.053481	1.19713
AT1G29010	-1.22379	-0.0019075	1.2257
AT1G10745	-1.38874	0.462971	0.925771
AT3G26940	-1.26295	0.0803643	1.18258
AT4G29273	-1.35292	0.319806	1.03312
AT1G06030	-0.969984	-0.406271	1.37625
AT5G27238	-1.35577	0.329433	1.02634
AT5G55132	-1.40221	0.541872	0.860338
AT5G12280	-1.2703	0.0968709	1.17343
AT3G27960	-1.25371	0.0601501	1.19356
AT2G17090	-0.859157	-0.543246	1.4024
AT5G19270	-1.18037	-0.0843843	1.26475
AT3G11550	-1.35856	0.339074	1.01948
AT5G25530	-1.27666	0.111441	1.16522
AT2G33160	-1.08257	-0.246776	1.32934
AT1G60987	-1.36318	0.355553	1.00763
AT1G69190	-1.26506	0.0850669	1.17999
AT1G35537	-1.29215	0.148328	1.14383
AT4G09462	-1.31542	0.207985	1.10743
AT2G23900	-1.29556	0.156715	1.13884
AT1G67775	-1.38478	0.44384	0.940945
AT3G10195	-1.38293	0.435305	0.947629
AT3G14950	-1.30596	0.183041	1.12292
AT2G04034	-1.39067	0.472789	0.917882
AT4G26260	-1.19718	-0.0533906	1.25057
AT1G74010	-1.25742	0.0682109	1.18921
AT1G03445	-1.22565	0.00181905	1.22383
AT2G41660	-1.1762	-0.0919052	1.26811
AT1G79370	-1.14346	-0.14895	1.29241
AT2G33810	-1.31455	0.205653	1.1089
AT1G03800	-1.07843	-0.253082	1.33151
AT2G30930	-1.20734	-0.0341039	1.24144
AT1G28327	-1.21832	-0.0127406	1.23107
AT2G40210	-1.20863	-0.031622	1.24025
AT2G27320	-1.04407	-0.304065	1.34813
AT1G74000	-1.10322	-0.214668	1.31789
AT1G35183	-1.32601	0.237241	1.08877
AT1G66855	-1.401	0.533472	0.867529
AT5G53240	-1.22381	-0.00186549	1.22568
AT3G10520	-1.21485	-0.0195491	1.2344
AT5G60440	-1.20243	-0.0434695	1.2459
AT5G64890	-0.975744	-0.398663	1.37441
AT2G15660	-1.01298	-0.348149	1.36113
AT5G54350	-1.13197	-0.168167	1.30014
AT2G04910	-1.35781	0.336471	1.02134
AT1G35242	-1.19023	-0.0663332	1.25656
AT3G43660	-1.11166	-0.20124	1.3129
AT1G72230	-1.3075	0.187027	1.12047
AT3G55630	-1.31103	0.196288	1.11475
AT5G21120	-1.21833	-0.0127208	1.23106
AT3G01329	-1.38499	0.44482	0.940174
AT1G30080	-1.08725	-0.23959	1.32684
AT5G03355	-1.02068	-0.337394	1.35808
AT2G20597	-1.37732	0.410726	0.966592
AT2G22121	-1.38479	0.443885	0.94091
AT5G27880	-1.14726	-0.142501	1.28976
AT4G23520	-1.21929	-0.0108326	1.23013
AT2G23148	-1.37801	0.413669	0.964344
AT1G30972	-1.05305	-0.290979	1.34403
AT3G01325	-1.39873	0.518624	0.880105
AT5G40900	-1.07321	-0.260993	1.3342
AT5G13620	-1.01697	-0.342588	1.35956
AT1G65970	-1.21428	-0.0206716	1.23495
AT5G61470	-0.932797	-0.454154	1.38695
AT1G10717	-1.39077	0.473296	0.917472
AT1G23350	-1.28277	0.125746	1.15702
AT1G10715	-1.33222	0.255131	1.07708
AT3G51710	-1.22729	0.00510466	1.22218
AT3G44810	-1.03983	-0.310177	1.35001
AT1G80740	-1.20232	-0.043673	1.246
AT1G22760	-1.14341	-0.149039	1.29244
AT1G27045	-1.32965	0.24765	1.08199
AT1G68210	-0.936898	-0.448976	1.38587
AT4G35190	-1.26426	0.0832908	1.18097
AT3G59220	-1.08414	-0.244371	1.32851
AT5G58310	-1.14791	-0.141393	1.2893
AT5G54360	-1.24878	0.0495779	1.1992
AT5G61620	-1.24797	0.0478545	1.20012
AT3G18250	-1.30196	0.172769	1.12919
AT5G47075	-1.39152	0.477235	0.914286
AT1G02900	-1.18181	-0.0817747	1.26358
AT2G16225	-1.36629	0.367025	0.999268
AT1G23145	-1.36989	0.38071	0.989176
AT4G29280	-1.39809	0.514602	0.883483
AT1G69825	-1.33897	0.275313	1.06366
AT5G59110	-1.27837	0.115417	1.16295
AT1G43605	-1.2414	0.0340146	1.20738
AT4G13490	-1.15672	-0.126262	1.28298
AT5G64905	-1.35049	0.311729	1.03876
AT1G22065	-1.26376	0.0821696	1.18159
AT2G47040	-1.14265	-0.150322	1.29297
AT4G37700	-1.10833	-0.206553	1.31489
AT3G20570	-1.12465	-0.180216	1.30487
AT5G67210	-1.15316	-0.132417	1.28557
AT3G10900	-1.01983	-0.338594	1.35842
AT3G02885	-1.25247	0.0574664	1.195
AT3G55254	-1.1188	-0.189748	1.30854
AT4G12170	-1.22344	-0.00261378	1.22605
AT5G39670	-1.19833	-0.0512234	1.24955
AT3G01270	-1.23679	0.0244595	1.21233
AT2G41451	-1.14784	-0.141512	1.28935
AT3G46670	-1.19675	-0.0541917	1.25094
AT3G15280	-1.34376	0.290128	1.05363
AT5G61520	-1.17567	-0.092863	1.26853
AT4G05985	-1.23833	0.0276419	1.21069
AT1G02790	-1.23783	0.0266054	1.21123
AT3G12190	-1.07274	-0.261697	1.33444
AT2G47030	-1.19176	-0.0634925	1.25526
AT3G54925	-1.23176	0.0141454	1.21761
AT3G19160	-1.11801	-0.191023	1.30903
AT4G29033	-1.30667	0.184865	1.1218
AT5G46200	-1.12477	-0.180019	1.30479
AT1G09360	-1.26071	0.0754078	1.1853
AT2G32860	-1.19322	-0.0607778	1.254
AT5G62623	-1.31777	0.214359	1.10341
AT1G17150	-1.09711	-0.22427	1.32138
AT5G06070	-1.17422	-0.0954695	1.26969
AT1G51230	-1.28633	0.134222	1.15211
AT2G04425	-1.38511	0.44537	0.939741
AT1G54980	-1.13921	-0.156099	1.29531
AT3G29631	-1.14442	-0.147322	1.29174
AT4G30074	-1.32027	0.221207	1.09907
AT4G13180	-1.15484	-0.129513	1.28435
AT4G39490	-1.168	-0.106538	1.27453
AT4G00610	-1.28819	0.138695	1.14949
AT1G07167	-1.24377	0.0389829	1.20479
AT5G58180	-1.3161	0.20983	1.10627
AT1G70230	-1.23149	0.0136	1.21789
AT3G46860	-1.30628	0.183872	1.12241
AT1G24000	-1.29002	0.143137	1.14689
AT4G08560	-1.21513	-0.0190036	1.23414
AT4G17860	-1.18921	-0.0682223	1.25743
AT2G26865	-1.282	0.123927	1.15807
AT1G63310	-1.23412	0.0189631	1.21515
AT5G20260	-1.25453	0.0619288	1.19261
AT4G28920	-1.22511	0.000727314	1.22438
AT4G00970	-1.29825	0.16342	1.13483
AT5G53200	-1.26914	0.0942407	1.1749
AT5G58850	-1.03038	-0.323701	1.35408
AT2G28010	-1.19494	-0.057576	1.25252
AT1G06747	-1.28478	0.130517	1.15426
AT4G14276	-1.34559	0.295923	1.04967
AT3G59340	-1.31452	0.205562	1.10896
AT1G73603	-1.34205	0.284794	1.05726
AT2G42885	-1.25852	0.0706119	1.18791
AT5G54215	-1.35557	0.32876	1.02681
AT5G46320	-1.32561	0.236114	1.0895
