# Supplementary material for: Transcriptome characteristics during cell wall formation of endosperm cellularization and embryo differentiation in Arabidopsis
Source: Front Plant Sci. 2022 Oct 3;13:998664. doi: 10.3389/fpls.2022.998664 (PMC9575994; doi:10.3389/fpls.2022.998664)
Supplement: Supplementary file 12 [file Table_6.xls]

## Sheet: sheet1
Supplementary Table 6 | Cluster III gene expression profiles of common 1102 DEGs in 4W vs 3W and 5W vs 4 W of Arabidopsis
Gene_ID	Expression value of normalized expression			Annotation
	W3	W4	W5
AT1G11185	-0.89375	1.39604	-0.502287	Other RNA
AT1G12340	-0.397837	1.3742	-0.976366	Probable protein cornichon homolog 2
AT1G13400	-0.623916	1.41107	-0.787154	Zinc finger protein JAGGED-like
AT1G13420	-0.961858	1.37877	-0.416914	Cytosolic sulfotransferase 8
AT1G14200	0.210044	1.10614	-1.31618	-
AT1G24388	0.36958	0.997393	-1.36697	Unknown protein
AT1G26800	-0.607616	1.40975	-0.802132	E3 ubiquitin-protein ligase MPSR1
AT1G27580	-0.124146	1.28209	-1.15794	Protein of unknown function (DUF295)
AT1G28480	-0.736089	1.41381	-0.677723	Glutaredoxin-C9
AT1G48940	-1.22604	1.22345	0.00258606	Early nodulin-like protein 6
AT1G07400	0.161554	1.13595	-1.2975	17.8 kDa class I heat shock protein
AT1G52560	-1.08036	1.33051	-0.250152	26.5 kDa heat shock protein, mitochondrial
AT1G53540	0.107068	1.1677	-1.27476	17.6 kDa class I heat shock protein 3
AT1G54050	0.114121	1.16369	-1.27781	17.4 kDa class III heat shock protein
AT1G59860	0.209134	1.10671	-1.31585	17.6 kDa class I heat shock protein 1
AT5G12020	-0.53846	1.40173	-0.863265	17.6 kDa class II heat shock protein
AT5G12030	-0.165698	1.29916	-1.13346	17.7 kDa class II heat shock protein
AT3G46230	0.0240225	1.21256	-1.23658	17.4 kDa class I heat shock protein
AT4G10250	-0.225733	1.32191	-1.09618	22.0 kDa heat shock protein
AT5G37670	-0.448409	1.38575	-0.937345	15.7 kDa heat shock protein, peroxisomal
AT4G32208	0.00658858	1.22144	-1.22803	Heat shock protein 70 (Hsp 70) family protein
AT4G12400	-0.0470642	1.2476	-1.20053	Hsp70-hsp90 organizing protein 3
AT1G16030	-0.367535	1.36643	-0.998894	Hsp70b
AT1G71000	-0.000831475	1.22516	-1.22433	Chaperone DnaJ-domain superfamily protein
AT1G74310	0.0102284	1.2196	-1.22983	Chaperone protein ClpB1
AT4G04330	-1.07954	1.33094	-0.251396	Chaperonin-like RBCX protein 1, chloroplastic
AT1G74460	-0.849842	1.40386	-0.554021	GDSL esterase/lipase At1g74460
AT1G75250	-1.22044	1.229	-0.00856362	RAD-like 6
AT1G53160	-0.857723	1.40263	-0.544911	Squamosa promoter-binding-like protein 4
AT1G76680	-0.119249	1.28001	-1.16076	12-oxophytodienoate reductase 1
AT2G15610	-0.963148	1.37838	-0.415231	Protein of unknown function (DUF1685)
AT1G63030	-1.02133	1.35782	-0.336487	Dehydration-responsive element-binding protein 1E
AT2G20142	-0.437928	1.38351	-0.94558	Toll-Interleukin-Resistance (TIR) domain family protein
AT2G20560	0.0390594	1.20475	-1.24381	-
AT2G22980	-0.824101	1.40736	-0.58326	Serine carboxypeptidase-like 13
AT2G26150	0.133907	1.15229	-1.2862	Heat stress transcription factor A-2
AT3G51910	-0.530049	1.40049	-0.870442	Heat stress transcription factor A-7a
AT3G63350	-0.524711	1.39968	-0.87497	Heat stress transcription factor A-7b
AT2G35270	-0.628622	1.41141	-0.782788	AT-hook motif nuclear-localized protein 21
AT2G35950	-1.26775	1.17665	0.0911025	Embryo sac development arrest 12
AT2G46240	-0.39831	1.37432	-0.97601	BAG family molecular chaperone regulator 6
AT3G02270	-1.02393	1.35676	-0.332827	Putative translation initiation factor EIF-2B epsilon subunit
AT3G04615	-0.942916	1.38425	-0.441331	-
AT3G07365	0.170954	1.13029	-1.30124	-
AT3G09135	-1.17892	1.26593	-0.0870017	-
AT3G09220	-0.39763	1.37415	-0.976522	Laccase-7
AT3G09940	-0.435312	1.38294	-0.947624	Monodehydroascorbate reductase 3
AT3G10020	-0.67637	1.41377	-0.737404	-
AT3G14060	-0.574163	1.40635	-0.832183	-
AT3G16070	-0.813031	1.40863	-0.5956	LOW protein: ATP-dependent RNA helicase-like protein
AT3G17261	-0.980838	1.37273	-0.391889	Transmembrane protein
AT3G21080	-0.299962	1.34686	-1.0469	ABC transporter-like protein
AT3G24500	0.187271	1.12032	-1.30759	MBF1C
AT3G27415	-0.275056	1.33888	-1.06383	Putative uncharacterized protein
AT3G42075	-1.00457	1.36433	-0.359758	Transmembrane protein
AT3G52310	-0.30448	1.34826	-1.04378	ABC-2 type transporter family protein
AT3G53720	-0.646062	1.4125	-0.766443	Cation/H(+) antiporter 20
AT3G55990	-0.719874	1.41414	-0.694263	Protein eskimo 1
AT3G61040	-0.675486	1.41375	-0.738263	Cytochrome P450 monooxygenase-like protein
AT3G61910	-0.346332	1.36062	-1.01429	NAC domain-containing protein 66
AT4G03565	-0.0322487	1.24055	-1.2083	Cystatin/monellin superfamily protein
AT4G08015	-0.707107	1.41421	-0.707107	-
AT4G21895	-0.916774	1.39093	-0.47416	DNA binding protein
AT4G25260	-0.881314	1.3985	-0.517187	Pectinesterase inhibitor 7
AT4G29905	-0.645268	1.41246	-0.767193	Putative uncharacterized protein
AT4G36820	-0.961335	1.37893	-0.417595	Calcium uniporter protein 1, mitochondrial
AT4G39795	-0.492238	1.39428	-0.902043	Protein of unknown function (DUF581)
AT5G01215	-0.098082	1.27084	-1.17275	Other RNA
AT5G03810	-1.0427	1.34874	-0.306044	GDSL esterase/lipase At5g03810
AT1G66080	-0.236745	1.32583	-1.08909	-
AT1G70840	-0.707107	1.41421	-0.707107	MLP-like protein 31
AT5G03975	-0.707107	1.41421	-0.707107	-
AT5G08165	-0.793098	1.41057	-0.617476	-
AT5G10100	-0.777862	1.41177	-0.633908	Trehalose 6-phosphate phosphatase
AT5G21950	-1.08233	1.32947	-0.247136	Alpha/beta-hydrolases superfamily protein
AT5G21960	-0.890413	1.39672	-0.506305	Ethylene-responsive transcription factor ERF016
AT5G26660	-0.38088	1.36993	-0.989051	Transcription factor MYB86
AT5G26731	-1.08834	1.32624	-0.237901	-
AT5G42797	-1.13413	1.29871	-0.164582	Defensin-like protein 130
AT1G72490	-0.350908	1.3619	-1.01099	Unknown protein
AT1G73510	-0.810779	1.40887	-0.598093	Uncharacterized protein T9L24.31
AT5G54165	-0.447155	1.38549	-0.938335	Avr9/Cf-9 rapidly elicited protein
AT5G60880	-0.714967	1.41418	-0.699218	Protein breaking of asymmetry in the stomatal lineage
