# Supplementary material for: Transcriptome characteristics during cell wall formation of endosperm cellularization and embryo differentiation in Arabidopsis
Source: Front Plant Sci. 2022 Oct 3;13:998664. doi: 10.3389/fpls.2022.998664 (PMC9575994; doi:10.3389/fpls.2022.998664)
Supplement: Supplementary file 13 [file Table_7.xls]

## Sheet: sheet1
Supplementary Table 7 | Cluster IV gene expression profiles of common 1102 DEGs in 4W vs 3W and 5W vs 4 W of Arabidopsis
Gene_ID	Expression values of normalized expression			Annotation
	W3	W4	W5
AT1G09550	-0.337993	-1.02026	1.35825	Pectin acetylesterase 1
AT5G54690	0.39716	-1.37404	0.976876	Probable galacturonosyltransferase 12
AT1G22800	1.00643	-1.36364	0.357207	Putative methyltransferase At1g22800, mitochondrial
AT1G27480	0.518735	-1.39875	0.880012	Lecithin-cholesterol acyltransferase-like 1
AT3G52720	0.494964	-1.39476	0.899801	Alpha carbonic anhydrase 1, chloroplastic
AT5G44630	0.412697	-1.37778	0.965087	Alpha-barbatene synthase
AT1G62660	0.188334	-1.308	1.11967	Acid beta-fructofuranosidase 3, vacuolar
AT1G80330	0.393317	-1.37308	0.979767	Gibberellin 3-beta-dioxygenase 4
AT4G02780	0.245864	-1.32903	1.08316	Ent-copalyl diphosphate synthase, chloroplastic
AT3G48187	0.0978716	-1.27074	1.17287	Serine/Threonine-kinase ATM
AT1G60630	0.6886	-1.41405	0.725453	Inactive leucine-rich repeat receptor-like serine/threonine-protein kinase At1g60630
AT2G04032	0.560961	-1.40475	0.843793	Zinc transporter 7
AT1G65900	0.653089	-1.41287	0.759782	-
AT1G78000	0.447702	-1.3856	0.937903	Sulfate transporter 1.2
AT1G79850	1.33092	-1.07958	-0.251339	30S ribosomal protein S17, chloroplastic
AT2G10940	1.26464	-1.18052	-0.0841192	-
AT2G40370	-0.204159	-1.10984	1.314	Laccase-5
AT2G42200	0.102818	-1.27291	1.17009	Squamosa promoter-binding-like protein 9
AT3G04010	-0.119878	-1.1604	1.28028	-
AT3G12510	0.365518	-1.36589	1.00037	-
AT3G42473	0.424884	-1.38061	0.955721	Defensin-like protein 91
AT3G52561	0.623881	-1.41107	0.787186	Putative uncharacterized protein
AT4G03190	0.435986	-1.38308	0.947098	GRR1-like protein 1
AT4G05775	0.752544	-1.41322	0.660675	-
AT4G06665	0.53005	-1.40049	0.870442	-
AT4G13540	0.365102	-1.36578	1.00068	Golgin family A protein
AT4G14723	0.760135	-1.41285	0.652718	Epidermal patterning factor-like protein 4
AT4G29020	-0.191168	-1.11792	1.30909	Putative glycine-rich protein 5
AT4G33560	0.46477	-1.3891	0.924331	-
AT5G03175	0.527348	-1.40008	0.872736	-
AT5G15150	0.509593	-1.39727	0.887673	Homeobox-leucine zipper protein HAT7
AT5G23230	1.05286	-1.34412	0.291255	Nicotinamidase 2
AT5G46690	0.33558	-1.35755	1.02197	Transcription factor bHLH71
AT1G53233	0.961592	-1.37885	0.417261	Other RNA
AT5G52860	-0.348916	-1.01243	1.36134	ABC transporter G family member 8
AT5G54510	0.513442	-1.3979	0.884455	GH3.6
