# Supplementary material for: Transcriptome characteristics during cell wall formation of endosperm cellularization and embryo differentiation in Arabidopsis
Source: Front Plant Sci. 2022 Oct 3;13:998664. doi: 10.3389/fpls.2022.998664 (PMC9575994; doi:10.3389/fpls.2022.998664)
Supplement: Supplementary file 14 [file Table_8.xlsx]

## Sheet: Sheet1
Supplementary Table 8 | Up-regulated transcription factors in 4W vs 3W and 5W vs 4W of Arabidopsis
Gene_ID	Gene name	Log2 Fold Change (4W/3W)	Log2 Fold Change (5W/4W)	Transcription factor category
AT3G52910	GRF4	2.97924	1.08861	GRF (Growth regulating factor)
AT2G36400	GRF3	2.11405	1.41677
AT4G23750	GRF2	1.52276	1.10403
AT2G22840	GRF1	1.46177	1.51727
AT3G13960	GRF5	1.5041	2.25374
AT2G45480	GRF9	1.79998	1.53627
AT2G06200	GRF6	3.04756	1.84538
AT5G17800	MYB56	3.11784	1.15464	MYB (v-MYB avian myeloblastosis viral oncogene homolog)
AT2G32460	MYB101	2.50987	1.31558
AT5G40360	MYB115	2.36116	1.16176
AT1G06180	MYB13	2.37554	2.8794
AT5G10280	MYB92	2.1308	1.3997
AT5G14750	WER	3.09306	2.33791
AT2G42150		1.95807	2.10308
AT4G04605		5.27799	3.59754
AT1G36060	ERF055	1.12342	1.82033	ERF (Ethylene response element binding factor)
AT1G28360	ERF12	1.06336	1.29692
AT2G40220	ABI4	1.01892	1.38442
AT5G53290	CRF3	1.75705	1.47169
AT3G16770	RAP2-3	1.23309	1.49966
AT2G17770	bZIP27	3.40558	2.58055	bZIP (basic region/leucine zipper motif)
AT3G44460	DPBF2	3.42663	2.28741
AT2G41070	EEL	1.1868	2.32235
AT1G49720	ABF1	1.94923	1.90052
AT3G61150	HDG1	1.26298	1.14614	HD-ZIP (Homeodomain leucine zipper)
AT5G03790	HB-51	2.60753	1.17899
AT5G46880	HDG5	1.56836	1.63421
AT2G34710	HB-14	1.712	1.58042
AT4G36930	SPT	1.2444	1.44213	bHLH (basic-Helix-Loop-Helix)
AT4G00480	MYC1	3.2741	3.12692
AT5G39860	PRE1	4.28833	2.68061
AT1G22490		1.79374	1.42444
AT1G14440	ZHD4	1.7694	2.35155	ZF-HD (Zinc Finger Homeobox)
AT5G39760	ZHD10	3.84595	3.12152
AT2G18350	ZHD6	1.3452	1.11921
AT1G75240	ZHD5	2.65517	3.67695
AT5G65410	ZHD1	2.46859	2.45315
AT3G54320	WRI1	1.72575	1.09936	AP2 (APET ALA 2)
AT4G37750	ANT	2.50814	1.65509
AT5G57390	AIL5	1.67857	2.45754
AT5G39610	NAC92	1.47127	1.04936	NAC
AT3G04070	NAC047	1.71843	1.10251
AT5G64530	NAC104	2.14975	3.35201
AT2G33880	WOX9	2.12165	1.89834	WOX (Wuschel-related homeobox)
AT2G28610	WOX3	2.5073	1.45587
AT3G18010	WOX1	5.17134	3.06303
AT5G65590	DOF5.7	4.23151	2.20265	Dof (DNA binding with one finger)
AT1G47655	DOF1.6	3.51523	1.35122
AT3G45610	DOF3.2	2.77184	1.2007
