# Supplementary material for: Transcriptome characteristics during cell wall formation of endosperm cellularization and embryo differentiation in Arabidopsis
Source: Front Plant Sci. 2022 Oct 3;13:998664. doi: 10.3389/fpls.2022.998664 (PMC9575994; doi:10.3389/fpls.2022.998664)
Supplement: Supplementary file 15 [file Table_9.xlsx]

## Sheet: Sheet1
Supplementary Table 9 | Down-regulated transcription factors in 4W vs 3W and 5W vs 4W of Arabidopsis
Gene_ID	Gene name	Log2 Fold Change (4W/3W)	Log2 Fold Change (5W/4W)	Transcription factor category
AT1G34170	ARF13	-3.00538	-6.01905	ARF (Auxin response factor)
AT1G35240	ARF20	-1.88909	-4.70592
AT1G35540	ARF14	-2.36077	-4.40803
AT1G34310	ARF12	-2.08752	-9.18362
AT1G35520	ARF15	-1.99444	-5.53864
AT1G34410	ARF21	-2.30658	-7.10016
AT1G34390	ARF22	-1.63853	-7.20269
AT3G61250	MYB17	-1.18776	-1.83049	MYB (v-MYB avian myeloblastosis viral oncogene homolog)
AT1G74430	MYB95	-1.37143	-1.65972
AT5G39700	MYB89	-1.98168	-3.57455
AT5G58850	MYB119	-2.14221	-4.84413
AT3G10595	MYB	-1.95793	-5.27403
AT5G53200	TRY	-1.04167	-1.75772
AT5G61620	MYB	-1.26809	-2.34122
AT1G28450	AGL58	-3.73816	-4.85151	MADS-box transcription factor
AT5G26650	AGL36	-3.06587	-2.66163
AT5G06500	AGL96	-1.99462	-4.66814
AT5G27960	AGL90	-2.26656	-3.75919
AT2G40210	AGL48	-1.76478	-6.71291
AT5G60440	AGL62	-1.44564	-2.61059
AT1G04445	C2H2	-2.20645	-3.89879	C2H2 transcription factor
AT5G42640	C2H2	-2.70792	-5.29312
AT5G27880	C2H2	-1.85812	-3.67194
AT5G61470	C2H2	-2.84222	-4.26299
AT5G06070	RBE	-1.32003	-1.88208
AT2G41940	ZFP8	-1.0728	-1.75169
AT1G34650	HD-ZIP10	-1.40913	-1.87087	HD-ZIP (Homeodomain leucine zipper)
AT1G26960	ATHB-23	-1.48958	-2.18807
AT1G27045	HB-other	-1.07738	-1.76106
