# Supplementary material for: Transcriptome characteristics during cell wall formation of endosperm cellularization and embryo differentiation in Arabidopsis
Source: Front Plant Sci. 2022 Oct 3;13:998664. doi: 10.3389/fpls.2022.998664 (PMC9575994; doi:10.3389/fpls.2022.998664)
Supplement: Supplementary file 16 [file Table_10.xlsx]

## Sheet: Table S10A
Supplementary Table 10A | KEEG enrichment analysis of up-regulated DEGs in 4W vs 3W
Number	Pathway id	Description	Database	Ratio_in_study	Ratio_in_pop	Pvalue	Gene_ids
8	map00901	Indole alkaloid biosynthesis	KEGG PATHWAY	8/379	27/10012	4.62e-06	AT4G37150|AT1G28610|AT2G23570|AT1G28640|AT2G23580|AT1G28650|AT1G28590|AT1G28600
16	map00940	Phenylpropanoid biosynthesis	KEGG PATHWAY	16/379	195/10012	0.00297397	AT3G60130|AT1G76790|AT5G20950|AT4G36220|AT1G77100|AT2G19070|AT3G50990|AT4G37990|AT2G40890|AT5G54570|AT5G19880|AT1G49570|AT3G21770|AT5G15180|AT2G18150|AT1G74550
4	map00941	Flavonoid biosynthesis	KEGG PATHWAY	4/379	27/10012	0.0177999	AT2G19070|AT5G63590|AT5G66230|AT2G40890
5	map00592	alpha-Linolenic acid metabolism	KEGG PATHWAY	5/379	41/10012	0.0185153	AT3G45140|AT1G19640|AT1G76680|AT1G20490|AT1G06310
20	map04075	Plant hormone signal transduction	KEGG PATHWAY	20/379	323/10012	0.0209719	AT3G44460|AT1G28130|AT2G46690|AT5G59010|AT2G01200|AT5G17490|AT1G74890|AT2G16580|AT1G19350|AT3G50750|AT5G27320|AT2G41070|AT3G63010|AT5G13220|AT5G20810|AT2G41370|AT2G21050|AT1G07430|AT1G49720|AT2G27070
5	map00061	Fatty acid biosynthesis	KEGG PATHWAY	5/379	44/10012	0.0244853	AT5G15530|AT3G25110|AT5G16230|AT4G13050|AT1G43800
3	map00904	Diterpenoid biosynthesis	KEGG PATHWAY	3/379	22/10012	0.0486279	AT5G07200|AT4G21690|AT2G32440
8	map00040	Pentose and glucuronate interconversions	KEGG PATHWAY	8/379	107/10012	0.0497422	AT3G09540|AT1G02810|AT5G51490|AT2G43870|AT3G14310|AT3G53190|AT1G04680|AT3G59850

## Sheet: Table S10B
Supplementary Table 10B | KEEG enrichment analysis of up-regulated DEGs in 5W vs 4W
Number	Pathway id	Description	Database	Ratio_in_study	Ratio_in_pop	P-value	Gene_ids
15	map00196	Photosynthesis - antenna proteins	KEGG PATHWAY	15/619	24/10012	4.86e-13	AT1G29930|AT1G29920|AT4G10340|AT2G08665|AT1G29910|AT3G54890|AT2G05070|AT2G40100|AT3G27690|AT3G61470|AT5G01530|AT3G47470|AT3G08940|AT2G05100|AT5G54270
22	map00195	Photosynthesis	KEGG PATHWAY	22/619	86/10012	7.04e-09	AT4G05180|ATCG00150|AT1G31330|ATCG00540|AT4G14890|AT2G30790|AT1G08380|ATCG00020|ATCG00270|ATCG00350|ATCG00120|AT1G55673|ATCG00480|ATCG00730|ATCG00720|AT3G50820|AT2G20260|ATCG00680|AT1G76100|ATCG00340|ATCG00130|ATCG00280
8	map00901	Indole alkaloid biosynthesis	KEGG PATHWAY	8/619	27/10012	0.000158297	AT4G37150|AT2G23570|AT1G28640|AT2G23580|AT2G23550|AT1G28600|AT1G28590|AT2G27360
7	map00966	Glucosinolate biosynthesis	KEGG PATHWAY	7/619	20/10012	0.000127284	AT1G16410|AT2G43100|AT5G23010|AT5G14200|AT5G23020|AT3G19710|AT4G13770
36	map04075	Plant hormone signal transduction	KEGG PATHWAY	36/619	323/10012	0.000404994	AT5G65210|AT2G26040|AT1G10470|AT4G36110|AT3G44460|AT5G25350|AT1G78290|AT4G03400|AT5G13370|AT1G67710|AT5G67260|AT1G28130|AT2G27050|AT4G31320|AT2G41070|AT3G16857|AT1G09530|AT2G47750|AT1G08320|AT1G04250|AT5G17490|AT2G16580|AT5G27320|AT5G10990|AT4G03190|AT5G54510|AT4G32280|AT4G31920|AT2G40670|AT2G21050|AT4G34160|AT5G07210|AT2G41370|AT1G07430|AT4G34760|AT1G49720
24	map00940	Phenylpropanoid biosynthesis	KEGG PATHWAY	24/619	195/10012	0.000936495	AT3G10340|AT1G02850|AT5G20950|AT1G49570|AT5G09640|AT1G77530|AT3G60130|AT1G76790|AT1G77100|AT4G36220|AT1G75940|AT2G40890|AT1G63140|AT2G34060|AT1G09487|AT5G15180|AT2G24800|AT5G20940|AT5G54570|AT2G43480|AT4G22100|AT1G48130|AT3G50990|AT1G74550
13	map00630	Glyoxylate and dicarboxylate metabolism	KEGG PATHWAY	13/619	83/10012	0.0016333	AT3G14420|AT5G04140|AT5G35630|ATCG00490|AT5G36700|AT5G47720|AT1G32470|AT1G48470|AT3G58740|AT4G33010|AT4G37930|AT3G14415|AT5G03860
9	map00350	Tyrosine metabolism	KEGG PATHWAY	9/619	45/10012	0.00148123	AT1G77120|AT4G12290|AT4G23600|AT1G22430|AT4G28680|AT1G32780|AT1G31670|AT4G28410|AT1G64710
8	map00062	Fatty acid elongation	KEGG PATHWAY	8/619	38/10012	0.00190761	AT5G43760|AT4G34520|AT1G71160|AT5G16010|AT2G28630|AT5G04530|AT1G68530|AT4G34510
12	map00561	Glycerolipid metabolism	KEGG PATHWAY	12/619	72/10012	0.00140902	AT2G19450|AT5G14980|AT5G20410|AT4G28130|AT4G01950|AT1G73480|AT1G02390|AT3G62860|AT5G01220|AT2G39420|AT3G44830|AT4G33030
8	map00960	Tropane, piperidine and pyridine alkaloid biosynthesis	KEGG PATHWAY	8/619	41/10012	0.00316495	AT4G12290|AT4G23600|AT2G29370|AT1G31670|AT2G29150|AT2G29340|AT4G28410|AT1G07450
20	map00500	Starch and sucrose metabolism	KEGG PATHWAY	20/619	168/10012	0.00357303	AT3G60130|AT4G27550|AT1G16980|AT5G20940|AT1G62660|AT1G02850|AT1G73370|AT4G22100|AT1G75940|AT1G04920|AT5G20950|AT5G54570|AT3G13790|AT1G78580|AT1G47840|AT5G19220|AT5G49190|AT1G66430|AT4G06665|AT4G17770
5	map00908	Zeatin biosynthesis	KEGG PATHWAY	5/619	22/10012	0.00970916	AT1G25410|AT5G21482|AT5G05860|AT5G05870|AT5G56970
5	map00904	Diterpenoid biosynthesis	KEGG PATHWAY	5/619	22/10012	0.00970916	AT1G05160|AT5G07200|AT4G02780|AT4G21690|AT1G80330
7	map00061	Fatty acid biosynthesis	KEGG PATHWAY	7/619	44/10012	0.0173351	AT1G43800|AT5G16230|AT5G15530|AT5G46290|AT3G02610|ATCG00500|AT1G74960
5	map01040	Biosynthesis of unsaturated fatty acids	KEGG PATHWAY	5/619	27/10012	0.0230846	AT5G16010|AT3G02610|AT5G16230|AT1G43800|AT1G06310
5	map00950	Isoquinoline alkaloid biosynthesis	KEGG PATHWAY	5/619	27/10012	0.0230846	AT4G23600|AT4G28680|AT1G31670|AT4G28410|AT4G12290
2	map00944	Flavone and flavonol biosynthesis	KEGG PATHWAY	2/619	5/10012	0.033675	AT5G17050|AT5G17040
18	map00190	Oxidative phosphorylation	KEGG PATHWAY	18/619	186/10012	0.038999	ATCG01110|ATCG01100|AT3G47950|ATCG01090|ATCG00420|ATCG01250|ATCG00480|ATCG00150|ATCG00440|ATCG01050|ATMG01360|ATCG01010|ATMG00730|ATCG00430|ATCG00120|ATCG00130|AT3G53620|ATCG00890
9	map00460	Cyanoamino acid metabolism	KEGG PATHWAY	9/619	77/10012	0.0471863	AT3G60130|AT1G02850|AT4G22100|AT1G75940|AT5G20940|AT5G20950|AT5G54570|AT4G37930|AT1G73050
8	map00900	Terpenoid backbone biosynthesis	KEGG PATHWAY	8/619	65/10012	0.0460098	AT3G02410|AT2G23400|AT2G18620|AT2G23410|AT5G47720|AT1G74470|AT5G58770|AT2G18640
