# Supplementary material for: Transcriptome characteristics during cell wall formation of endosperm cellularization and embryo differentiation in Arabidopsis
Source: Front Plant Sci. 2022 Oct 3;13:998664. doi: 10.3389/fpls.2022.998664 (PMC9575994; doi:10.3389/fpls.2022.998664)
Supplement: Supplementary file 17 [file Table_11.xlsx]

## Sheet: Sheet1
Supplementary Table 11 | Different pathways of representative DEGs in 4W vs 3W and 5W vs 4W of Arabidopsis
Gene_ID	Gene name	Description	Fold change (4W/3W)	Fold change (5W/4W)	Protein category
Hormone related genes
AT1G77110	PIN6	Auxin efflux carrier component6	4.78	5.08	Auxin
AT2G01420	PIN4	Auxin efflux carrier component4	-	2.17
AT2G21050	LAX2	Auxin transporter-like protein 2	2.14	2.95
AT2G28350	ARF10	Auxin response factor 10	-	2.45
AT5G60450	ARF4	Auxin response factor 4	2.29	3.67
AT1G30330	ARF6	Auxin response factor 6	-	3.25
AT2G46530	ARF11	Auxin response factor 11	3.94	3.83
AT3G61830	ARF18	Auxin response factor 18	-	2.6
AT4G23980	ARF9	Auxin response factor 9	-	3.1
AT4G30080	ARF16	Auxin response factor 16	-	3.08
AT1G72430	SAUR78	Auxin-responsive protein SAUR78	3.32	2.3
AT2G46690	SAUR32	Auxin-responsive protein SAUR32	2.06	-
AT5G57420	IAA33	Auxin-responsive protein IAA33	2.22	-
AT2G01200	IAA32	Auxin-responsive protein IAA32	2.07	-
AT4G31320		Auxin induced like-protein	-	19.46
AT5G20810		SAUR-like auxin-responsive protein family	2.23	-
AT2G16580		Putative auxin-induced protein	15.56	3.03
AT5G56970	CKX3	Cytokinin dehydrogenase 3	9.65	2.91	Cytokinin
AT5G21482	CKX7	Cytokinin dehydrogenase 7	-	2.19
AT5G06300	LOG7	Cytokinin riboside 5'-monophosphate phosphoribohydrolase LOG7	2.4	-
AT3G53450	LOG4	Cytokinin riboside 5'-monophosphate phosphoribohydrolase	2.75	-
AT2G37210	-	Cytokinin riboside 5'-monophosphate phosphoribohydrolase	-	5.13
AT1G49720	ABF1	Abscisic acid responsive element-binding factor 1	3.86	3.73	Abscisic acid
AT3G44460	DPBF2	ABSCISIC ACID-INSENSITIVE 5-like protein 1	10.75	4.88
AT1G49720	ABF1	Abscisic acid responsive element-binding factor 1	3.86	3.73
AT2G26040	PYL2	Abscisic acid receptor PYL2	-	3.1
Carbohydrate metabolism
AT1G73370	SUS6	Sucrose synthase 6	-	2.86	SUS6
AT5G49190	SUS2	Sucrose synthase 2	-	8.29	SUS2
AT1G04920	SPS3	Probable sucrose-phosphate synthase 3	2.9	2.11	SPS3
AT1G22710	SUC2	Sucrose transport protein SUC2	-	2.08	SUC2
AT4G15500	UGT84A4	UDP-glycosyltransferase 84A4	-	3.13	UDP-glycosyltransferase
AT5G05870	UGT76C1	UDP-glycosyltransferase 76C1	-	2.32
AT5G38010	UGT76E9	UDP-glycosyltransferase 76E9	-	4.37
AT2G23260	UGT84B1	UDP-glycosyltransferase 84B1	-	3.07
AT4G15490	UGT73B2	UDP-glycosyltransferase 84A3	4.63	6.28
AT4G19460	UGT84A3	UDP-glycosyltransferase superfamily protein	3.61	-
AT4G34135	TPS4	UDP-glucosyl transferase 73B2	3.65	-
AT3G23820	GAE6	UDP-glucuronate 4-epimerase 6	-	2.27
Cell wall genes
AT2G47030	PME4	Pectinesterase 4	0.46	0.28	pectin
AT2G47040	PME5	Pectinesterase 5	0.35	0.24
AT1G62760	PMEI10	Pectinesterase inhibitor 10	-	30.68
AT2G47670	PMEI6	Pectinesterase inhibitor 6	11.66	17.53
AT4G25260	PMEI7	Pectinesterase inhibitor 7	2.01	0.48
AT3G17150		Plant invertase/pectin methylesterase inhibitor superfamily protein	0.16	0.04
AT3G17227		Plant invertase/pectin methylesterase inhibitor superfamily protein	0.18	0.03
AT3G17230		Plant invertase/pectin methylesterase inhibitor superfamily protein	0.27	0.03
AT3G27999		Plant invertase/pectin methylesterase inhibitor superfamily protein	0.31	0.06
AT4G03945		Plant invertase/pectin methylesterase inhibitor superfamily protein	0.32	0.15
AT5G20740		Plant invertase/pectin methylesterase inhibitor superfamily protein	0.48	0.28
AT1G56620		Plant invertase/pectin methylesterase inhibitor superfamily protein	0.27	0.01
AT4G18780	CESA8	Cellulose synthase	-	2.9	Cellulose
AT2G25540	CESA10	Cellulose synthase 10	-	2.31
AT2G21770	CESA9	Probable cellulose synthase A catalytic subunit 9		2.52
AT2G32530	CSLB3	Cellulose synthase-like protein B3	-	6.43
AT5G09870	CESA5	Cellulose synthase A catalytic subunit 5	-	2.67
AT2G31960	CALS2	Callose synthase 2	-	2.19	Callose synthase
AT4G04970	CALS11	Callose synthase 11	-	2.07
AT1G20190	EXPA11	Expansin-A11	-	5.62	Expansin
AT2G03090	EXPA15	Expansin-A15	-	2.38
AT2G20750	EXPB1	Expansin-B1	9.56	15.32
AT2G39700	EXPA4	Expansin-A4	3.75	4.31
AT3G29030	EXPA5	Expansin 5	-	5.05
