# Supplementary material for: Transcriptome characteristics during cell wall formation of endosperm cellularization and embryo differentiation in Arabidopsis
Source: Front Plant Sci. 2022 Oct 3;13:998664. doi: 10.3389/fpls.2022.998664 (PMC9575994; doi:10.3389/fpls.2022.998664)
Supplement: Supplementary file 18 [file Table_12.xlsx]

## Sheet: Table S 12A
Supplementary Table 12A | KEGG enrichment analysis of up-regulated DEGs in 5M vs 3W
Number	Pathway id	Description	Database	Ratio_in_study	Ratio_in_pop	Pvalue	Gene_ids
9	map00901	Indole alkaloid biosynthesis	KEGG PATHWAY	9/814	27/10012	0.000182075	AT4G37150|AT1G28610|AT2G23570|AT1G28640|AT2G23580|AT2G23550|AT1G28660|AT1G28590|AT1G28600
7	map00966	Glucosinolate biosynthesis	KEGG PATHWAY	7/814	20/10012	0.000691224	AT1G16410|AT2G43100|AT5G23010|AT5G23020|AT4G39950|AT3G19710|AT4G13770
10	map00061	Fatty acid biosynthesis	KEGG PATHWAY	10/814	44/10012	0.00232065	AT1G43800|AT1G64400|AT2G38040|AT5G16230|AT4G13050|AT1G36180|AT5G15530|AT3G02610|AT1G77590|AT3G25110
9	map00640	Propanoate metabolism	KEGG PATHWAY	9/814	37/10012	0.00231139	AT3G13450|AT3G06850|AT4G16155|AT5G48230|AT2G38040|AT5G34780|AT1G36180|AT5G15530|AT3G16950
28	map00940	Phenylpropanoid biosynthesis	KEGG PATHWAY	28/814	195/10012	0.0021671	AT1G02850|AT1G49570|AT3G21770|AT3G62750|AT3G60130|AT1G76790|AT1G77100|AT4G05160|AT2G40890|AT1G63140|AT3G09260|AT1G74545|AT3G21230|AT5G15180|AT2G19070|AT4G33870|AT5G20940|AT5G54570|AT5G19880|AT5G66690|AT2G38380|AT2G41480|AT4G37990|AT4G37520|AT1G48130|AT3G50990|AT1G74550|AT1G61810
30	map04141	Protein processing in endoplasmic reticulum	KEGG PATHWAY	30/814	235/10012	0.00879773	AT3G09350|AT1G52560|AT2G03170|AT3G46230|AT3G09440|AT3G23660|AT1G54050|AT1G16030|AT1G59790|AT1G53540|AT2G29500|AT5G12030|AT3G60010|AT4G34210|AT5G37670|AT1G07400|AT2G16595|AT4G27670|AT4G10250|AT3G53230|AT4G25200|AT3G07365|AT1G59860|AT3G12580|AT4G34470|AT1G43140|AT5G51440|AT5G12020|AT5G52640|AT1G08450
7	map00909	Sesquiterpenoid and triterpenoid biosynthesis	KEGG PATHWAY	7/814	29/10012	0.00730824	AT5G24155|AT4G15340|AT5G24160|AT4G37760|AT5G36150|AT1G58440|AT1G78970
8	map00100	Steroid biosynthesis	KEGG PATHWAY	8/814	37/10012	0.00853812	AT5G24155|AT5G24160|AT3G02590|AT4G37760|AT1G58440|AT3G45130|AT1G47290|AT2G34500
21	map00520	Amino sugar and nucleotide sugar metabolism	KEGG PATHWAY	21/814	156/10012	0.0148597	AT2G30575|AT1G50460|AT1G02730|AT1G66430|AT3G55590|AT1G53500|AT5G44480|AT5G50750|AT1G63180|AT3G42850|AT3G08900|AT5G15490|AT3G23820|AT3G10740|AT1G30620|AT5G24090|AT1G47840|AT1G63000|AT3G12500|AT2G47650|AT2G46480
13	map03440	Homologous recombination	KEGG PATHWAY	13/814	87/10012	0.0229161	AT4G02110|AT2G05635|AT4G19130|AT3G42670|AT3G06205|AT3G31900|AT3G32280|AT2G22140|AT3G19210|AT1G20750|AT5G57450|AT2G05642|AT2G08085
8	map00280	Valine, leucine and isoleucine degradation	KEGG PATHWAY	8/814	49/10012	0.042365	AT3G06850|AT4G16155|AT5G48230|AT5G34780|AT1G23800|AT3G13450|AT1G10060|AT3G16950

## Sheet: Table S 12B
Supplementary Table 12B | KEGG enrichment analysis of up-regulated DEGs in 6M vs 4W
Number	Pathway id	Description	Database	Ratio_in_study	Ratio_in_pop	Pvalue	Gene_ids
31	map00940	Phenylpropanoid biosynthesis	KEGG PATHWAY	31/777	195/10012	9.44e-05	AT3G10340|AT1G68850|AT1G02850|AT1G49570|AT5G09640|AT3G21770|AT3G60130|AT1G76790|AT3G21370|AT1G77100|AT1G75940|AT2G40890|AT1G63140|AT1G61820|AT5G06720|AT1G09487|AT3G21230|AT5G15180|AT5G20940|AT5G54570|AT5G66690|AT2G43480|AT2G38380|AT2G41480|AT3G47040|AT4G37520|AT1G48130|AT4G05160|AT1G74550|AT3G50990|AT1G61810
8	map00901	Indole alkaloid biosynthesis	KEGG PATHWAY	8/777	27/10012	0.000744634	AT1G28610|AT2G23570|AT2G23580|AT2G23550|AT1G28600|AT1G28660|AT1G28590|AT2G27360
7	map00966	Glucosinolate biosynthesis	KEGG PATHWAY	7/777	20/10012	0.000521162	AT4G31500|AT1G16410|AT5G23010|AT5G23020|AT4G39950|AT3G19710|AT4G13770
9	map00310	Lysine degradation	KEGG PATHWAY	9/777	35/10012	0.00109266	AT4G33150|AT1G54100|AT1G23800|AT5G47720|AT2G24740|AT4G02020|AT1G44170|AT5G65750|AT2G07845
9	map00071	Fatty acid degradation	KEGG PATHWAY	9/777	45/10012	0.0068246	AT1G77120|AT1G64400|AT1G54100|AT1G44170|AT1G23800|AT5G47720|AT2G35690|AT5G58860|AT1G77590
22	map00500	Starch and sucrose metabolism	KEGG PATHWAY	22/777	168/10012	0.0105436	AT1G02850|AT1G73370|AT1G47840|AT3G60130|AT1G16980|AT3G21370|AT1G75940|AT1G04920|AT1G61820|AT1G50460|AT4G27550|AT4G02280|AT5G63625|AT5G49190|AT5G20940|AT5G54570|AT5G37180|AT4G25000|AT4G06665|AT1G62660|AT3G47040|AT1G61810
11	map00561	Glycerolipid metabolism	KEGG PATHWAY	11/777	72/10012	0.0221849	AT5G06090|AT5G14980|AT5G20410|AT4G28130|AT3G17770|AT1G73480|AT1G23800|AT1G54100|AT3G62860|AT1G44170|AT3G11430
20	map00520	Amino sugar and nucleotide sugar metabolism	KEGG PATHWAY	20/777	156/10012	0.0177342	AT2G30575|AT1G50460|AT1G02730|AT5G15490|AT3G55590|AT1G53500|AT5G24090|AT5G50750|AT3G42850|AT5G15650|AT2G47650|AT3G23820|AT1G30620|AT4G19810|AT1G47840|AT3G08900|AT1G63000|AT3G12500|AT3G12502|AT2G46480
8	map00910	Nitrogen metabolism	KEGG PATHWAY	8/777	45/10012	0.0209694	AT1G77760|AT1G58180|AT1G08080|AT5G14570|AT1G12940|AT1G48470|AT1G08090|AT2G15620
11	map00460	Cyanoamino acid metabolism	KEGG PATHWAY	11/777	77/10012	0.0346158	AT3G60130|AT3G21370|AT4G13890|AT1G75940|AT5G20940|AT5G54570|AT3G47040|AT1G61820|AT1G73050|AT1G61810|AT1G02850
9	map00380	Tryptophan metabolism	KEGG PATHWAY	9/777	60/10012	0.040559	AT4G31500|AT1G54100|AT1G23800|AT5G47720|AT1G70560|AT5G20960|AT4G39950|AT1G44170|AT5G65750

## Sheet: Table S 12C
Supplementary Table 12C | KEGG enrichment analysis of up-regulated DEGs in 7M vs 5W
Number	Pathway id	Description	Database	Ratio_in_study	Ratio_in_pop	Pvalue	Gene_ids
8	map00901	Indole alkaloid biosynthesis	KEGG PATHWAY	8/702	27/10012	0.000376154	AT2G23560|AT1G74020|AT2G23580|AT2G23550|AT1G28660|AT3G50440|AT1G28650|AT1G74010
24	map00500	Starch and sucrose metabolism	KEGG PATHWAY	24/702	168/10012	0.000640847	AT4G39000|AT5G54569|AT3G47010|AT3G21370|AT1G75940|AT1G61820|AT2G44560|AT1G05610|AT4G02280|AT5G63625|AT4G39010|AT5G20940|AT5G54570|AT5G37180|AT1G70290|AT4G25000|AT1G66280|AT1G06030|AT1G62660|AT3G60140|AT3G47040|AT1G22210|AT2G44540|AT1G61810
32	map04141	Protein processing in endoplasmic reticulum	KEGG PATHWAY	32/702	235/10012	0.000213843	AT3G09350|AT1G52560|AT2G03170|AT3G46230|AT3G09440|AT1G18830|AT1G54050|AT1G16030|AT1G53540|AT2G29500|AT1G77510|AT5G12030|AT3G60010|AT4G34210|AT5G37670|AT1G07400|AT4G27670|AT4G10250|AT3G53230|AT4G25200|AT3G07365|AT1G59860|AT1G65040|AT1G56410|AT4G03510|AT3G12580|AT4G34470|AT1G43140|AT5G51440|AT5G12020|AT5G52640|AT5G59720
10	map00073	Cutin, suberine and wax biosynthesis	KEGG PATHWAY	10/702	45/10012	0.000907371	AT1G70680|AT5G41040|AT5G08250|AT1G70670|AT4G26740|AT5G55240|AT3G44540|AT5G22500|AT5G58860|AT5G63560
25	map00940	Phenylpropanoid biosynthesis	KEGG PATHWAY	25/702	195/10012	0.00238753	AT3G10340|AT1G68850|AT5G54569|AT3G21770|AT3G47010|AT3G12900|AT3G21370|AT1G75940|AT1G61820|AT5G06720|AT5G14130|AT5G15180|AT5G20940|AT5G54570|AT5G42180|AT1G66280|AT2G43480|AT3G60140|AT2G38380|AT2G41480|AT4G36430|AT3G47040|AT1G48130|AT1G74550|AT1G61810
12	map00460	Cyanoamino acid metabolism	KEGG PATHWAY	12/702	77/10012	0.00697741	AT1G66280|AT3G21370|AT4G13890|AT5G54569|AT1G75940|AT5G20940|AT5G54570|AT3G47040|AT1G61820|AT3G47010|AT1G61810|AT3G60140
7	map00310	Lysine degradation	KEGG PATHWAY	7/702	35/10012	0.00965711	AT4G33150|AT1G23800|AT2G24740|AT1G17780|AT4G02020|AT1G44170|AT3G59960
19	map04016	MAPK signaling pathway - plant	KEGG PATHWAY	19/702	172/10012	0.0322218	AT2G30250|AT1G18350|AT5G21120|AT5G51760|AT1G63440|AT2G32510|AT2G41100|AT5G07390|AT1G19230|AT5G51060|AT5G39670|AT1G20620|AT5G03280|AT3G59790|AT3G26830|AT3G12500|AT2G29380|AT3G12502|AT3G23150
2	map00903	Limonene and pinene degradation	KEGG PATHWAY	2/702	5/10012	0.0425834	AT1G44170|AT1G23800
7	map00053	Ascorbate and aldarate metabolism	KEGG PATHWAY	7/702	48/10012	0.048374	AT5G14470|AT1G23800|AT4G26260|AT3G09640|AT3G09940|AT1G44170|AT1G55560

## Sheet: Table S 12D
Supplementary Table 12D | KEGG enrichment analysis of down-regulated DEGs in 5M vs 3W
Number	Pathway id	Description	Database	Ratio_in_study	Ratio_in_pop	Pvalue	Gene_ids
19	map00196	Photosynthesis - antenna proteins	KEGG PATHWAY	19/932	24/10012	5.86e-16	AT1G29930|AT1G29920|AT4G10340|AT1G61520|AT1G45474|AT1G29910|AT3G54890|AT2G05070|AT1G15820|AT1G76570|AT2G34430|AT3G27690|AT3G61470|AT5G01530|AT5G54270|AT3G47470|AT3G08940|AT2G05100|AT1G19150
35	map00195	Photosynthesis	KEGG PATHWAY	35/932	86/10012	6.44e-15	AT4G02770|AT4G05180|AT2G30570|AT4G21280|AT4G14890|AT1G44575|AT1G06680|AT4G12800|AT3G50820|AT1G52230|AT4G28750|AT2G30790|AT4G28755|AT1G08380|AT5G66570|AT1G79040|AT4G03280|AT5G45040|AT1G20020|AT1G32550|AT1G30380|AT1G55670|AT1G55673|AT4G09650|AT5G64040|AT1G31330|AT1G67740|AT1G03600|AT2G20260|AT3G55330|AT1G03130|AT1G76100|AT1G20340|AT3G16140|AT1G10960
46	map00940	Phenylpropanoid biosynthesis	KEGG PATHWAY	46/932	195/10012	2.02e-09	AT5G05340|AT4G25980|AT5G04230|AT5G64120|AT1G15950|AT5G19890|AT3G21560|AT3G53260|AT5G47000|AT3G62710|AT2G37040|AT3G12900|AT4G39330|AT5G12270|AT4G16270|AT5G48930|AT1G52760|AT4G37980|AT2G30490|AT2G21730|AT2G44480|AT1G45191|AT4G21760|AT2G34060|AT1G74540|AT5G28510|AT5G51890|AT4G27820|AT2G24800|AT1G65060|AT5G40150|AT5G14130|AT5G42180|AT2G44460|AT3G28200|AT3G21240|AT2G37130|AT4G08770|AT4G31760|AT3G60140…
39	map00500	Starch and sucrose metabolism	KEGG PATHWAY	39/932	168/10012	5.49e-08	AT4G10260|AT4G39000|AT5G20830|AT2G19860|AT3G62710|AT3G59480|AT1G32900|AT1G78090|AT2G36190|AT1G55120|AT3G13560|AT2G44480|AT1G45191|AT4G21760|AT2G44560|AT5G10100|AT5G28510|AT3G43860|AT2G44540|AT3G26140|AT2G22190|AT4G27820|AT5G48300|AT3G43190|AT4G17090|AT4G22590|AT3G45940|AT2G44460|AT4G12430|AT5G11920|AT1G06030|AT3G60140|AT1G35910|AT2G31390|AT1G22210|AT3G29320|AT2G44490|AT2G32860|AT2G44550
61	map04075	Plant hormone signal transduction	KEGG PATHWAY	61/932	323/10012	4.98e-08	AT5G47220|AT4G40010|AT3G62100|AT1G51950|AT1G32640|AT2G21200|AT1G04240|AT2G01760|AT4G00870|AT1G70700|AT3G09870|AT5G19710|AT1G68210|AT1G03445|AT3G57040|AT2G17090|AT3G23050|AT4G38840|AT5G42750|AT1G19830|AT1G06160|AT4G26120|AT1G75580|AT1G59500|AT1G19050|AT1G17380|AT4G14550|AT2G33860|AT3G04730|AT1G19850|AT2G23170|AT4G34760|AT1G72450|AT5G21120|AT1G56150|AT1G04250|AT1G59940|AT3G20220|AT1G14920|AT4G04402…
28	map00040	Pentose and glucuronate interconversions	KEGG PATHWAY	28/932	107/10012	3.07e-07	AT4G24780|AT5G44830|AT5G49180|AT1G14420|AT5G19730|AT1G67750|AT1G69940|AT3G43270|AT3G27980|AT5G07410|AT1G02790|AT4G33220|AT4G03930|AT4G32380|AT3G05620|AT3G14040|AT3G01270|AT2G47030|AT3G07850|AT4G32370|AT4G02300|AT1G11370|AT3G24230|AT3G05610|AT3G15720|AT5G27870|AT5G15110|AT1G11590
21	map00710	Carbon fixation in photosynthetic organisms	KEGG PATHWAY	21/932	76/10012	3.58e-06	AT5G56720|AT2G45290|AT5G38410|AT4G38970|AT5G38430|AT3G26650|AT1G67090|AT4G26520|AT1G23310|AT5G38420|AT1G12900|AT1G32060|AT3G55800|AT3G54050|AT1G42970|AT1G68750|AT5G09660|AT2G03925|AT5G25880|AT1G62800|AT1G43670
10	map00941	Flavonoid biosynthesis	KEGG PATHWAY	10/932	27/10012	8.99e-05	AT4G22880|AT5G48930|AT3G51238|AT2G30490|AT1G61720|AT3G51240|AT5G13930|AT4G34050|AT5G42800|AT3G55120
12	map00592	alpha-Linolenic acid metabolism	KEGG PATHWAY	12/932	41/10012	0.000243852	AT5G48880|AT2G06050|AT2G06925|AT4G15440|AT3G45140|AT1G13280|AT1G67560|AT3G25770|AT3G25760|AT5G38120|AT1G76680|AT1G72520
5	map00905	Brassinosteroid biosynthesis	KEGG PATHWAY	5/932	9/10012	0.000633226	AT5G38970|AT5G05690|AT3G50660|AT5G14400|AT2G26710
18	map00630	Glyoxylate and dicarboxylate metabolism	KEGG PATHWAY	18/932	83/10012	0.000512591	AT3G14420|AT1G36370|AT5G38410|AT1G68010|AT5G38430|AT5G35630|AT1G67090|AT2G35370|AT1G23310|AT4G37560|AT5G38420|AT5G56720|AT1G32470|AT3G14150|AT2G13360|AT5G09660|AT4G37930|AT5G04140
12	map00073	Cutin, suberine and wax biosynthesis	KEGG PATHWAY	12/932	45/10012	0.000626609	AT1G65450|AT5G41040|AT1G02190|AT5G37300|AT4G00360|AT1G01600|AT2G45970|AT1G72970|AT1G63710|AT5G23190|AT3G10570|AT1G02205
17	map00460	Cyanoamino acid metabolism	KEGG PATHWAY	17/932	77/10012	0.000584502	AT1G36370|AT4G27820|AT3G60140|AT1G69820|AT4G37560|AT2G44490|AT5G22300|AT3G44320|AT2G32860|AT2G44480|AT1G45191|AT4G21760|AT3G62710|AT4G39650|AT2G44460|AT4G37930|AT5G28510
20	map00480	Glutathione metabolism	KEGG PATHWAY	20/932	101/10012	0.000885521	AT1G77490|AT1G10370|AT1G07890|AT3G43800|AT1G02940|AT2G08340|AT1G69820|AT1G17170|AT1G27130|AT2G29420|AT4G39650|AT1G02930|AT4G35970|AT2G29440|AT1G02950|AT2G30870|AT5G27380|AT5G17220|AT3G09270|AT4G09010
6	map00430	Taurine and hypotaurine metabolism	KEGG PATHWAY	6/932	16/10012	0.00226266	AT2G02000|AT1G69820|AT1G65960|AT5G17330|AT4G39650|AT5G15120
11	map00910	Nitrogen metabolism	KEGG PATHWAY	11/932	45/10012	0.00225577	AT3G03910|AT5G04180|AT3G52720|AT4G37560|AT3G44320|AT1G70410|AT3G01500|AT5G14740|AT5G04140|AT5G18170|AT5G35630
11	map00250	Alanine, aspartate and glutamate metabolism	KEGG PATHWAY	11/932	51/10012	0.00632648	AT3G03910|AT5G17330|AT5G35630|AT2G02000|AT1G23310|AT3G47340|AT1G65960|AT3G24090|AT2G13360|AT5G18170|AT1G62800
13	map00052	Galactose metabolism	KEGG PATHWAY	13/932	67/10012	0.00800956	AT5G11920|AT5G08380|AT3G52840|AT5G23790|AT2G36190|AT1G55120|AT2G19860|AT3G47800|AT4G23920|AT5G08370|AT3G45940|AT5G40390|AT1G09350
10	map00360	Phenylalanine metabolism	KEGG PATHWAY	10/932	47/10012	0.00997445	AT3G21240|AT5G04230|AT1G51680|AT1G62800|AT1G65060|AT2G30490|AT3G53260|AT4G34050|AT4G28410|AT2G37040
4	map00591	Linoleic acid metabolism	KEGG PATHWAY	4/932	10/10012	0.0099119	AT3G45140|AT2G06925|AT1G67560|AT1G72520
10	map00053	Ascorbate and aldarate metabolism	KEGG PATHWAY	10/932	48/10012	0.0115781	AT3G02870|AT1G07890|AT1G77490|AT4G26255|AT3G13400|AT4G35970|AT5G21105|AT3G13390|AT1G55560|AT4G09010
14	map00260	Glycine, serine and threonine metabolism	KEGG PATHWAY	14/932	79/10012	0.0134601	AT1G36370|AT1G68010|AT2G35370|AT1G23310|AT3G54640|AT3G04520|AT1G72810|AT1G14820|AT1G32470|AT2G13360|AT3G19480|AT1G17745|AT1G17744|AT4G37930
4	map00603	Glycosphingolipid biosynthesis - globo and isoglobo series	KEGG PATHWAY	4/932	11/10012	0.014444	AT2G38152|AT2G38150|AT5G08370|AT5G08380
6	map00908	Zeatin biosynthesis	KEGG PATHWAY	6/932	22/10012	0.012997	AT2G19500|AT5G19040|AT3G19160|AT4G24650|AT3G63440|AT1G75450
6	map00904	Diterpenoid biosynthesis	KEGG PATHWAY	6/932	22/10012	0.012997	AT1G47990|AT4G02780|AT1G80330|AT1G15550|AT1G30040|AT1G80340
18	map00270	Cysteine and methionine metabolism	KEGG PATHWAY	18/932	115/10012	0.01931	AT4G11280|AT3G61510|AT1G14820|AT1G50090|AT5G27380|AT4G28410|AT3G13110|AT5G28020|AT4G37770|AT5G56720|AT3G04940|AT3G03780|AT1G55920|AT5G09660|AT1G80740|AT4G17260|AT1G62800|AT5G18930
4	map00531	Glycosaminoglycan degradation	KEGG PATHWAY	4/932	12/10012	0.0200974	AT5G61250|AT3G52840|AT5G47900|AT5G34940
16	map00564	Glycerophospholipid metabolism	KEGG PATHWAY	16/932	100/10012	0.0218681	AT4G00400|AT1G48600|AT5G25370|AT2G26870|AT5G57690|AT2G06925|AT1G51300|AT2G38110|AT1G27480|AT4G30340|AT3G18850|AT3G15650|AT1G80860|AT3G48610|AT1G52700|AT1G06520
8	map00062	Fatty acid elongation	KEGG PATHWAY	8/932	38/10012	0.0215131	AT1G07720|AT5G47350|AT5G47340|AT1G24470|AT4G17480|AT4G17470|AT1G01120|AT5G43760
24	map04016	MAPK signaling pathway - plant	KEGG PATHWAY	24/932	172/10012	0.0287117	AT4G11280|AT4G40010|AT4G13000|AT1G32640|AT4G00870|AT4G23900|AT5G46330|AT3G45640|AT3G61510|AT5G62230|AT1G06160|AT2G41090|AT5G39670|AT5G21120|AT5G24770|AT5G07180|AT4G27920|AT4G17880|AT2G26330|AT4G26070|AT2G41100|AT1G18350|AT5G53210|AT5G63650
8	map00220	Arginine biosynthesis	KEGG PATHWAY	8/932	40/10012	0.0287076	AT4G08870|AT3G03910|AT4G38220|AT5G35630|AT1G23310|AT5G18170|AT2G31100|AT1G62800

## Sheet: Table S 12E
Supplementary Table 12E | KEGG enrichment analysis of down-regulated DEGs in 6M vs 4W
Num	Pathway id	Description	Database	Ratio_in_study	Ratio_in_pop	Pvalue	Gene_ids
38	map00195	Photosynthesis	KEGG PATHWAY	38/930	86/10012	1.41e-17	AT4G02770|AT4G05180|AT2G30570|AT4G21280|AT4G14890|AT1G14150|AT1G06680|AT4G12800|AT3G50820|AT1G52230|AT1G05183|AT4G28750|AT2G30790|AT1G08380|AT5G66570|AT1G79040|AT4G03280|AT5G45040|AT1G20020|AT1G32550|AT1G30380|AT1G55670|AT1G55673|AT4G09650|AT5G64040|AT1G31330|AT1G67740|AT3G01440|AT4G28660|AT1G03600|AT2G20260|AT3G55330|AT1G03130|AT1G76100|AT1G20340|AT3G16140|AT1G10960|AT1G44575
20	map00196	Photosynthesis - antenna proteins	KEGG PATHWAY	20/930	24/10012	1.4e-17	AT1G29930|AT4G10340|AT1G61520|AT1G45474|AT2G08665|AT1G29910|AT3G54890|AT2G05070|AT1G15820|AT2G40100|AT2G34430|AT3G27690|AT3G61470|AT5G01530|AT5G54270|AT3G47470|AT1G76570|AT3G08940|AT2G05100|AT1G19150
62	map04075	me	KEGG PATHWAY	62/930	323/10012	1.89e-08	AT5G47220|AT4G40010|AT3G62100|AT1G51950|AT1G19830|AT3G19290|AT4G00870|AT2G40330|AT1G04240|AT2G01760|AT3G50750|AT4G38860|AT3G09870|AT5G19710|AT1G68210|AT3G57040|AT2G17090|AT3G23050|AT4G38840|AT3G59790|AT5G42750|AT5G46830|AT2G01200|AT1G32640|AT1G06160|AT1G75580|AT1G19050|AT1G17380|AT3G17600|AT4G34000|AT1G34170|AT3G04730|AT4G14550|AT2G23170|AT4G34760|AT1G72450|AT4G12410|AT2G46990|AT1G56150|AT2G31230…
40	map00940	Phenylpropanoid biosynthesis	KEGG PATHWAY	62/930	195/10012	1.15e-06	AT2G22420|AT1G24735|AT5G04230|AT5G64120|AT5G19890|AT5G47000|AT2G37040|AT3G12900|AT4G39330|AT5G12270|AT3G18070|AT5G48930|AT1G52760|AT4G37980|AT2G30490|AT2G21730|AT1G45191|AT4G21760|AT4G37530|AT5G14130|AT4G27820|AT1G65060|AT2G18150|AT5G19880|AT5G42180|AT5G40150|AT2G44460|AT3G28200|AT3G21240|AT2G37130|AT4G31760|AT3G60140|AT1G51680|AT1G77520|AT1G71695|AT1G26560|AT4G34050|AT2G32860|AT2G22990|AT1G60260
25	map00480	Glutathione metabolism	KEGG PATHWAY	25/930	101/10012	3.79e-06	AT1G10370|AT1G02940|AT1G69820|AT1G44790|AT2G02930|AT3G23580|AT1G49860|AT2G47730|AT2G29450|AT2G30870|AT1G02930|AT3G43800|AT2G08340|AT4G39650|AT5G27380|AT1G74590|AT3G62760|AT1G77490|AT1G07890|AT1G78320|AT2G29420|AT4G09010|AT2G29440|AT5G17220|AT3G09270
26	map00040	Pentose and glucuronate interconversions	KEGG PATHWAY	26/930	107/10012	3.53e-06	AT5G17200|AT3G09540|AT5G44830|AT5G49180|AT1G05660|AT1G67750|AT3G43270|AT4G24780|AT3G54920|AT3G27980|AT1G02790|AT4G33220|AT1G14420|AT4G03930|AT4G32380|AT3G01270|AT2G47030|AT4G32370|AT4G02300|AT3G53190|AT1G04680|AT3G24230|AT3G05610|AT3G15720|AT5G48900|AT1G11590
11	map00941	Flavonoid biosynthesis	KEGG PATHWAY	11/930	27/10012	1.35e-05	AT4G22880|AT1G24735|AT5G48930|AT3G51238|AT2G30490|AT1G61720|AT3G51240|AT5G13930|AT4G34050|AT5G42800|AT3G55120
14	map00073	Cutin, suberine and wax biosynthesis	KEGG PATHWAY	14/930	45/10012	3.46e-05	AT1G65450|AT4G33790|AT1G02190|AT5G37300|AT4G00360|AT1G01600|AT2G45970|AT1G72970|AT1G24540|AT3G48720|AT5G23190|AT3G10570|AT1G57750|AT1G02205
6	map00905	Brassinosteroid biosynthesis	KEGG PATHWAY	6/930	9/10012	4.15e-05	AT2G26710|AT5G38970|AT3G30180|AT5G05690|AT3G50660|AT3G13730
16	map00710	Carbon fixation in photosynthetic organisms	KEGG PATHWAY	16/930	76/10012	0.00140683	AT5G38410|AT4G38970|AT3G26650|AT1G67090|AT4G26530|AT1G43670|AT5G38430|AT5G38420|AT1G12900|AT1G32060|AT3G54050|AT5G64380|AT1G68750|AT5G09660|AT5G25880|AT1G62800
28	map00500	Starch and sucrose metabolism	KEGG PATHWAY	28/930	168/10012	0.00161031	AT4G39000|AT4G12430|AT5G19221|AT3G59480|AT1G78090|AT3G18070|AT4G39210|AT2G36190|AT3G13560|AT1G45191|AT4G21760|AT5G10100|AT2G44540|AT3G26140|AT2G22190|AT4G27820|AT3G43190|AT1G26560|AT2G44460|AT5G11920|AT3G60140|AT4G24040|AT1G35910|AT3G29320|AT4G22590|AT2G32860|AT1G60260|AT2G44550
11	map00360	Phenylalanine metabolism	KEGG PATHWAY	11/930	47/10012	0.00320523	AT1G24735|AT5G04230|AT5G57170|AT1G65060|AT2G30490|AT1G51680|AT4G34050|AT3G21240|AT1G62800|AT2G37040|AT4G14940
10	map00592	alpha-Linolenic acid metabolism	KEGG PATHWAY	10/930	41/10012	0.00353812	AT5G48880|AT2G06050|AT2G06925|AT4G15440|AT3G45140|AT1G67560|AT3G25770|AT3G25760|AT5G38120|AT1G76680
9	map00062	Fatty acid elongation	KEGG PATHWAY	9/930	38/10012	0.00682688	AT1G07720|AT5G47350|AT1G24470|AT4G17480|AT4G17470|AT1G01120|AT3G10280|AT3G52160|AT2G46720
4	map00945	Stilbenoid, diarylheptanoid and gingerol biosynthesis	KEGG PATHWAY	4/930	10/10012	0.00983696	AT5G48930|AT4G34050|AT1G24735|AT2G30490
6	map00908	Zeatin biosynthesis	KEGG PATHWAY	6/930	22/10012	0.0128672	AT2G19500|AT5G19040|AT3G19160|AT4G24650|AT5G05860|AT1G75450
4	map00603	Glycosphingolipid biosynthesis - globo and isoglobo series	KEGG PATHWAY	4/930	11/10012	0.0143371	AT2G38152|AT2G38150|AT5G08370|AT5G08380
8	map00130	Ubiquinone and other terpenoid-quinone biosynthesis	KEGG PATHWAY	8/930	36/10012	0.0155087	AT3G21240|AT1G60600|AT1G65060|AT2G30490|AT1G51680|AT1G64970|AT1G23360|AT1G30520
4	map00531	Glycosaminoglycan degradation	KEGG PATHWAY	4/930	12/10012	0.019952	AT5G61250|AT3G52840|AT5G47900|AT5G34940
8	map00920	Sulfur metabolism	KEGG PATHWAY	8/930	41/10012	0.0324979	AT4G39940|AT5G28020|AT3G03630|AT3G04940|AT3G13110|AT1G55920|AT4G21990|AT5G63990
9	map00860	Porphyrin and chlorophyll metabolism	KEGG PATHWAY	9/930	49/10012	0.034446	AT4G25080|AT3G56940|AT4G27440|AT5G45930|AT1G74470|AT1G19670|AT1G03630|AT3G48730|AT3G09150
5	map00904	Diterpenoid biosynthesis	KEGG PATHWAY	5/930	22/10012	0.0474931	AT1G15550|AT5G51810|AT2G34555|AT1G80340|AT1G47990
23	map04016	MAPK signaling pathway - plant	KEGG PATHWAY	23/930	172/10012	0.0472616	AT4G40010|AT1G32640|AT4G00870|AT2G40330|AT4G23900|AT5G63310|AT3G61510|AT5G53210|AT5G24780|AT5G62230|AT1G06160|AT5G24770|AT2G41090|AT2G31230|AT5G07180|AT3G59790|AT4G17880|AT5G46830|AT4G09320|AT4G26070|AT2G41100|AT1G18350|AT5G63650

## Sheet: Table S 12F
Supplementary Table 12F | KEGG enrichment analysis of down-regulated DEGs in 7M vs 5W
Number	Pathway id	Description	Database	Ratio_in_study	Ratio_in_pop	Pvalue	Gene_ids
53	map00195	Photosynthesis	KEGG PATHWAY	53/973	86/10012	1.69e-32	1.7e-30	AT4G02770|AT4G05180|AT2G30570|AT4G32260|AT1G79040|AT4G21280|AT4G14890|AT1G44575|AT1G06680|AT4G12800|AT3G50820|AT1G52230|AT1G60950|AT4G28750|AT2G30790|AT1G08380|AT5G66570|ATCG00020|AT4G03280|AT5G45040|AT1G20020|ATCG00270|ATCG00350|AT1G32550|AT1G30380|AT1G55670|AT1G55673|AT4G09650|AT5G64040|ATCG00540|AT1G76100|ATCG00730|AT1G31330|AT1G67740|ATCG00480|ATCG00470|ATCG00720|AT3G01440|ATCG00120|AT4G28660…			PSAD1;PSBQ2;PSBW;;PSBR;PSBQ1;FdC2;PSBS;PSBP1;PSAL;PSBO2;PSAH2;FD2;PSAE1;PSBP2;PSAO;PSBO1;PSBA;PETC;PETJ;LFNR2;PSBD;PSAA;FdC1;PSAK;PSAG;;ATPD;PSAN;PETA;PETE1;PETD;PSAF;PSBY;ATPB;ATPE;PETB;PNSL3;ATPA;PSB28;LFNR1;PSB27-1;PSAE2;PPL1;PSBB;PSAD2;ATPI;DRT112;PSAB;PSAH1;ATPF;PSBC;FD1
22	map00196	Photosynthesis - antenna proteins	KEGG PATHWAY	22/973	24/10012	9.8e-21	4.95e-19	AT1G29930|AT2G08665|AT1G29910|AT3G61470|AT5G01530|AT2G05100|AT1G05207|AT3G27690|AT2G40100|AT1G29920|AT3G54890|AT1G15820|AT3G47470|AT3G08940|AT2G34430|AT2G05070|AT1G19150|AT1G76570|AT1G61520|AT1G45474|AT4G10340|AT5G54270			LHCB1.3;;LHCB1.1;LHCA2;LHCB4.1;LHCB2.1;;LHCB2.4;LHCB4.3;LHCB1.1;LHCA1;LHCB6;LHCA4;LHCB4.2;LHB1B1;LHCB2.2;LHCA6;LHCB7;LHCA3;LHCA5;LHCB5;LHCB3
20	map00860	Porphyrin and chlorophyll metabolism	KEGG PATHWAY	20/973	49/10012	8.5e-09	2.86e-07	AT1G58290|AT1G08520|AT4G25080|AT3G56940|AT3G09150|AT1G03475|AT1G44446|AT5G45930|AT4G18480|AT5G18660|AT5G54190|AT3G51820|AT1G74470|AT2G40490|AT4G27440|AT1G03630|AT5G63570|AT3G48730|AT5G08280|AT5G13630			HEMA1;CHLD;CHLM;CRD1;HY2;CPX1;CAO;CHLI2;CHLI1;DVR;PORA;CHLG;CHLP;HEME2;PORB;PORC;GSA1;GSA2;HEMC;CHLH
22	map00710	Carbon fixation in photosynthetic organisms	KEGG PATHWAY	22/973	76/10012	1.83e-06	4.63e-05	AT5G58330|AT5G09660|AT1G67090|AT1G23310|AT5G38420|AT1G12900|AT3G55800|AT1G43670|AT5G61410|ATCG00490|AT4G26520|AT1G42970|AT1G32060|AT2G01290|AT5G64380|AT4G38970|AT2G03925|AT2G42600|AT5G38410|AT3G26650|AT5G38430|AT3G54050			;PMDH2;RBCS-1A;GGAT1;RBCS-2B;GAPA-2;SBPASE;CYFBP;RPE;RBCL;;GAPB;PRK;RPI2;;FBA2;;PPC2;;GAPA1;RBCS-1B;CFBP1
22	map00630	Glyoxylate and dicarboxylate metabolism	KEGG PATHWAY	22/973	83/10012	9e-06	0.000181747	AT5G35630|AT5G36700|AT5G09660|AT3G14415|AT1G67090|AT2G35370|AT1G23310|AT5G38420|AT5G36790|AT1G32470|AT4G37550|AT2G13360|ATCG00490|AT4G33010|AT3G58740|AT3G14420|AT5G38410|AT1G68010|AT4G37560|AT5G38430|AT4G37930|AT5G03860			GLN2;PGLP1A;PMDH2;;RBCS-1A;GDH1;GGAT1;RBCS-2B;PGLP1A;GDH3;;AGT1;RBCL;GLDP1;CSY1;GLO1;;HPR;;RBCS-1B;SHM1;MLS
10	map00941	Flavonoid biosynthesis	KEGG PATHWAY	10/973	27/10012	0.000129403	0.00217829	AT4G22880|AT3G51238|AT3G51240|AT5G08640|AT2G30490|AT5G63580|AT5G13930|AT5G07990|AT5G42800|AT3G55120			LDOX;;F3H;FLS1;CYP73A5;FLS2;CHS;CYP75B1;DFRA;CHI1
22	map00040	Pentose and glucuronate interconversions	KEGG PATHWAY	22/973	107/10012	0.000524798	0.00757208	AT3G09540|AT5G49180|AT1G05660|AT5G19730|AT1G02810|AT5G51970|AT3G43270|AT4G24780|AT3G54920|AT4G33220|AT4G13210|AT5G55590|AT4G03930|AT5G61410|AT4G13710|AT1G11590|AT1G04680|AT3G59850|AT5G14650|AT3G15720|AT5G48900|AT3G53190			;PME58;;PME53;PME7;SDH;PME32;;PMR6;PME44;;QRT1;PME42;RPE;;PME19;;;;;;
5	map00905	Brassinosteroid biosynthesis	KEGG PATHWAY	5/973	9/10012	0.000774199	0.00781941	AT5G38970|AT5G05690|AT3G50660|AT3G30180|AT2G26710			CYP85A1;CYP90A1;CYP90B1;CYP85A2;CYP734A1
30	map00500	Starch and sucrose metabolism	KEGG PATHWAY	30/973	168/10012	0.000731169	0.00820534	AT5G20830|AT5G20950|AT3G54270|AT1G47840|AT5G19220|AT3G59480|AT1G32900|AT5G11720|AT1G78090|AT4G39210|AT5G24300|AT2G36190|AT3G13560|AT1G45191|AT4G21760|AT3G03640|AT5G10100|AT4G27820|AT5G48300|AT3G43190|AT4G17090|AT4G06665|AT5G51460|AT5G51820|AT4G24040|AT4G22100|AT1G35910|AT3G13790|AT3G29320|AT2G44490			SUS1;;SPP3A;HXK3;ADG2;;GBSS1;;TPPB;APL3;SS1;CWINV4;;BGLU1;BGLU47;BGLU25;TPPI;BGLU9;APS1;SUS4;BAM3;;TPPA;PGMP;TRE1;BGLU3;TPPD;CWINV1;PHS1;BGLU26
8	map00904	Diterpenoid biosynthesis	KEGG PATHWAY	8/973	22/10012	0.000713677	0.00901017	AT4G25420|AT1G47990|AT1G78440|AT4G02780|AT1G05160|AT5G51810|AT1G80340|AT1G30040			GA20OX1;GA2OX4;GA2OX1;GA1;KAO1;GA20OX2;GA3OX2;GA2OX2
45	map04075	Plant hormone signal transduction	KEGG PATHWAY	45/973	323/10012	0.00825388	0.0555761	AT5G47220|AT3G62100|AT4G00870|AT1G68640|AT4G36110|AT3G57130|AT3G50750|AT5G35750|AT3G17860|AT1G01360|AT2G26040|AT1G04550|AT3G09870|AT5G06839|AT1G67710|AT5G42750|AT5G67260|AT1G28130|AT2G46690|AT2G27050|AT5G01240|AT1G19840|AT1G19050|AT1G17380|AT4G34760|AT1G49720|AT1G72450|AT1G19830|AT1G04250|AT1G14920|AT2G46990|AT4G29080|AT5G10990|AT4G03190|AT4G17880|AT2G22670|AT4G01026|AT2G21050|AT5G46790|AT1G74890…			ERF2;IAA30;BHLH14;PAN;;NPR6;BEH1;AHK2;TIFY6B;PYL9;PYL2;IAA12;;TGA10;ARR11;BKI1;CYCD3;2;GH3.17;SAUR32;EIL1;LAX1;;ARR7;TIFY11A;SAUR50;ABF1;TIFY11B;;IAA17;GAI;IAA20;IAA27;;GRH1;MYC4;IAA8;PYL7;LAX2;PYL1;ARR15;CYCD3-1;SRK2H;NPR5;AHP6;ARF1
18	map00564	Glycerophospholipid metabolism	KEGG PATHWAY	18/973	100/10012	0.00726184	0.0564189	AT4G00400|AT3G48610|AT1G06520|AT5G57690|AT1G01610|AT2G06925|AT4G01950|AT1G51300|AT3G18000|AT5G08030|AT1G02390|AT3G03530|AT3G18850|AT3G15650|AT2G26870|AT1G27480|AT4G09760|AT3G05630			GPAT8;NPC6;GPAT1;DGK4;GPAT4;PLA2-ALPHA;ATGPAT3;;NMT1;;GPAT2;NPC4;LPAT5;;NPC2;LCAT1;;PLPZETA2
13	map00030	Pentose phosphate pathway	KEGG PATHWAY	13/973	63/10012	0.00670575	0.0564401	AT2G24270|AT1G12230|AT5G61410|AT1G43670|AT5G24420|AT5G51820|AT2G01290|AT5G35790|AT5G64380|AT4G38970|AT2G03925|AT3G54050|AT4G26520			ALDH11A3;;RPE;CYFBP;PGL5;PGMP;RPI2;G6PD1;;FBA2;;CFBP1;
3	map00944	Flavone and flavonol biosynthesis	KEGG PATHWAY	3/973	5/10012	0.00787401	0.0568054	AT5G17050|AT5G17040|AT5G07990			UGT78D2;UGT78D4;CYP75B1
9	map00062	Fatty acid elongation	KEGG PATHWAY	9/973	38/10012	0.00912375	0.0575936	AT5G43760|AT5G47350|AT1G24470|AT4G17480|AT4G34520|AT4G17470|AT1G01120|AT5G16010|AT3G52160			KCS20;;KCR2;;FAE1;;KCS1;;KCS15
9	map00130	Ubiquinone and other terpenoid-quinone biosynthesis	KEGG PATHWAY	9/973	36/10012	0.00628208	0.0576809	AT4G28420|AT1G60600|AT1G30520|AT1G65060|AT1G18870|AT2G30490|AT1G60550|AT3G63410|AT4G28410			;ABC4;AAE14;4CL3;ICS2;CYP73A5;MENB;VTE3;
29	map00940	Phenylpropanoid biosynthesis	KEGG PATHWAY	29/973	195/10012	0.0132618	0.0787908	AT2G22420|AT5G20950|AT3G21560|AT3G53260|AT4G21960|AT2G21890|AT2G37040|AT4G39330|AT4G36220|AT3G50990|AT1G77530|AT2G30490|AT1G45191|AT4G21760|AT2G34060|AT4G37980|AT3G03640|AT4G27820|AT2G24800|AT1G65060|AT2G18150|AT5G19880|AT5G40150|AT3G28200|AT4G31760|AT4G22100|AT1G71695|AT2G44490|AT2G22990			PER17;;UGT84A2;PAL2;PER42;CAD3;PAL1;CAD9;CYP84A1;PER36;;CYP73A5;BGLU1;BGLU47;PER19;CAD7;BGLU25;BGLU9;PER18;4CL3;PER15;PER58;PER63;PER31;PER46;BGLU3;PER12;BGLU26;SNG1
13	map00561	Glycerolipid metabolism	KEGG PATHWAY	13/973	72/10012	0.0201801	0.113233	AT4G00400|AT5G08380|AT5G57690|AT1G01610|AT5G11650|AT4G01950|AT2G11810|AT1G02390|AT3G18850|AT1G73480|AT5G01220|AT3G44830|AT1G06520			GPAT8;AGAL1;DGK4;GPAT4;;ATGPAT3;MGD3;GPAT2;LPAT5;;SQD2;PDAT2;GPAT1
49	map03010	Ribosome	KEGG PATHWAY	49/973	379/10012	0.0226961	0.120648	AT1G64510|ATCG00830|ATCG00380|ATCG00660|AT3G44890|AT4G17560|AT2G43030|AT3G54210|AT5G54600|AT1G32990|AT3G44590|AT1G74970|ATCG00330|AT4G01310|AT5G02095|AT1G75350|ATCG00790|AT2G40008|AT3G25920|ATCG00160|AT5G40950|AT2G24090|ATCG00650|ATCG00770|AT3G63490|ATCG01310|AT5G14320|AT2G33450|ATCG00750|AT3G27830|ATCG00800|ATCG00810|AT5G30510|AT3G27850|AT1G35680|ATCG00900|AT1G78630|AT1G05190|AT1G29070|AT3G15190…			;rpl2-A;RPS4;RPL20;RPL9;;RPL3A;RPL17;RPL24;RPL11;RPP2D;RPS9;RPS14;RPL5;;RPL31;RPL16;;RPL15;RPS2;RPL27;RPL35;RPS18;RPS8;RPL1;rpl2-A;RPS13;RPL28;RPS11;RPL12A;RPS3;RPL22;RPS1;RPL12C;RPL21;RPS7-A;RPL13;RPL6;RPL34;RPS20;;RPL4;RPL18;RPS7-A;RPL16;RPL14;RPL10;RPS10;RPS5
11	map00380	Tryptophan metabolism	KEGG PATHWAY	11/973	60/10012	0.0281079	0.141945	AT4G24670|AT1G04610|AT5G24960|AT5G43890|AT5G25980|AT4G28720|AT5G11320|AT3G44310|AT5G26000|AT5G25620|AT4G32540			TAR2;YUC3;CYP71A14;YUC5;TGG2;YUC8;YUC4;NIT1;TGG1;YUC6;YUC
21	map00240	Pyrimidine metabolism	KEGG PATHWAY	21/973	141/10012	0.0312299	0.150201	AT3G23580|AT5G06300|AT3G57080|AT3G03710|ATCG00740|AT3G18680|AT1G20065|ATCG00180|AT2G28305|AT1G30820|AT3G12670|AT3G53450|AT4G29650|AT2G19572|AT4G20320|AT2G37210|ATCG00170|ATCG00190|AT5G23070|AT5G63310|AT2G41340			RNR2A;LOG7;NRPE5A;PNP1;RPOA;;;RPOC1;LOG1;;emb2742;LOG4;CDA4;;;;RPOC2;RPOB;TK1B;NDPK2;NRPD5B
7	map02010	ABC transporters	KEGG PATHWAY	7/973	33/10012	0.0362427	0.166387	AT1G10680|AT1G27940|AT3G28415|AT3G62700|AT3G28345|AT1G02530|AT2G36910			ABCB10;ABCB13;ABCB22;ABCC14;ABCB15;ABCB12;ABCB1
9	map04712	Circadian rhythm - plant	KEGG PATHWAY	9/973	49/10012	0.0441403	0.193833	AT2G46830|AT1G68050|AT2G46790|AT5G15840|AT5G15850|AT5G13930|AT3G17609|AT5G08330|AT5G24470			CCA1;ADO3;APRR9;CO;COL1;CHS;HYH;TCP21;APRR5
