# Supplementary material for: Transcriptome characteristics during cell wall formation of endosperm cellularization and embryo differentiation in Arabidopsis
Source: Front Plant Sci. 2022 Oct 3;13:998664. doi: 10.3389/fpls.2022.998664 (PMC9575994; doi:10.3389/fpls.2022.998664)
Supplement: Supplementary file 19 [file Table_13.xlsx]

## Sheet: Sheet1
Supplementary Table 13 | The DEGs related to plant hormone signal transduction in naa15
Gene_ID	Gene name	Log2 Fold Change (5M/3W)	Log2 Fold Change (6M/4W)	Log2 Fold Change (7M/5W)
AT5G21120	EIL2	-1.42307	-	3.3265
AT1G59500	GH3.4	-1.70556	-	1.13326
AT3G21510	AHP1	1.02661	-	1.74126
AT1G28130	GH3.17	2.68498	-	-2.15495
AT2G46690	SAUR32	1.07244	-	-1.30498
AT3G60690	0	1.37766	-	2.28987
AT4G03190	GRH1	-1.09579	-	-1.40182
AT1G14920	GAI	-1.46078	-	-1.87801
AT3G19290	ABF4	-	-1.06994	-
AT5G46830	BHLH28	-	-4.24056	-
AT2G31230	ERF15	-	-2.78194	-
AT2G40330	PYL6	-	-1.01407	-
AT4G38860	-	-	-4.27021	-
AT3G17600	-	-	-1.13025	-
AT2G01200	-	-	-1.68723	-
AT1G04310	-	-	1.00153	-
AT2G40940	-	-	1.35008	-
AT3G62100	IAA30	-1.97394	-1.77469	-1.92715
AT2G21050	LAX2	-1.78005	-1.98748	-3.60203
AT5G47220	ERF2	-4.44287	-1.86137	-2.41478
AT1G68640	PAN	-2.29259	-3.35451	-4.70093
AT3G09870	0	-3.72034	-3.65165	-1.82502
AT1G08320	TGA9	1.63018	3.1396	1.11616
AT1G19830	0	-1.96387	-1.57619	-2.53692
AT4G29080	IAA27	-1.75706	-3.05364	-1.84621
AT5G03280	EIN2	1.49267	1.77595	1.05294
AT5G20810	0	1.63655	1.31509	1.07866
AT3G17860	TIFY6B	-1.86181	-1.70833	-1.08873
AT5G65210	TGA1	3.17555	3.12584	2.08273
AT4G34760	SAUR50	-1.37446	-1.76965	-2.46527
AT5G63650	SRK2H	-1.32667	-1.4076	-1.66927
AT4G00870	BHLH14	-1.69411	-2.86629	-3.06856
AT1G19050	ARR7	-2.05804	-2.13567	-3.39368
AT1G19840	0	-1.90057	-1.85189	-1.32345
AT2G38120	AUX1	1.30048	1.58793	1.2001
AT1G72450	TIFY11B	-3.66486	-3.29993	-1.49607
AT1G17380	TIFY11A	-1.94202	-1.79284	-1.92676
AT1G80100	AHP6	-2.59256	-2.20106	-2.66117
AT5G42750	BKI1	-1.50811	-1.74716	-2.28182
AT4G17880	MYC4	-1.8905	-2.05274	-2.10984
AT1G49720	ABF1	1.78607	1.01247	-1.01194
AT2G47750	GH3.9	3.72924	4.66746	2.64774
AT1G04250	IAA17	-2.33282	-2.14457	-3.60225
AT3G50070	CYCD3-3	1.90697	1.72853	1.06978
AT2G22670	IAA8	-1.50535	-1.4575	-1.18486
AT2G46990	IAA20	-	-3.01037	-2.12675
AT2G41370	NPR5	-	-2.20445	-6.13674
AT3G59790	MPK10	-	-1.08069	1.90322
AT1G74890	ARR15	-	-1.38812	-2.23701
AT4G12410	0	-	-1.7524	1.67831
AT3G50750	BEH1	-	-1.19291	-1.99151
AT5G49240	APRR4	-	4.21268	5.3941
AT4G14560	IAA1	-	1.06642	1.49286
AT1G48670	0	-	2.39248	1.79517
AT3G23150	ETR2	-	1.93975	1.33638
AT4G22620	0	-	2.1484	2.6389
AT2G14960	GH3.1	-	3.33343	3.27951
AT3G09240	0	-	1.29351	1.76752
AT2G40670	ARR16	-	2.13883	2.99296
AT5G51760	AHG1	-	2.63121	4.06396
AT1G67710	ARR11	-	-	-3.41291
AT5G35750	AHK2	-	-	-1.26364
AT1G01360	PYL9	-	-	-1.52169
AT4G34160	CYCD3-1	-	-	-2.37216
AT1G04550	IAA12	-	-	-1.3659
AT3G57130	NPR6	-	-	-2.63941
AT2G27050	EIL1	-	-	-1.14276
AT1G59750	ARF1	-	-	-1.03821
AT2G26040	PYL2	-1.0544	-	-2.8258
AT5G67260	CYCD3;2	-	-	-1.41125
AT4G36110	0	-	-	-5.59563
AT5G46790	PYL1	-	-	-1.1908
AT5G10990	0	-	-	-3.82524
AT5G01240	LAX1	-	-	-1.33672
AT2G43010	PIF4	-	-	1.34514
AT3G15540	IAA19	-	-	1.20121
AT2G29380	HAI3	-	-	1.79594
AT1G50990	BSK11	-	-	1.63193
AT5G13320	PBS3	-	-	1.53504
AT1G48690	0	-	-	4.06779
AT5G58080	ARR18	-	-	3.71451
AT1G03430	AHP5	1.33278	-	-
AT1G10470	ARR4	1.76399	-	-
AT1G19850	ARF5	-1.1	-	-
AT1G19350	BES1	1.45144	-	-
AT5G59010	BSK5	1.33215	-	-
AT1G66350	RGL1	-1.9054	-	-
AT5G45110	NPR3	-1.16726	-	-
AT1G49190	RR19	1.00292	-	-
AT2G33860	ARF3	-1.56766	-	-
AT4G26120	0	-1.42108	-	-
AT4G27920	PYL10	-5.78812	-	-
AT1G75080	BZR1	1.23529	-	-
AT3G03450	RGL2	-1.16214	-	-
AT2G21220	0	-4.02175	-4.76228	-
AT4G14550	IAA14	-5.77474	-4.22892	-
AT2G21200	0	-1.98392	-2.16377	-
AT5G43700	IAA4	-1.53889	-2.63983	-
AT1G09530	PIF3	1.66046	1.39633	-
AT1G56150	SAUR71	-4.98874	-4.38174	-
AT2G16580	0	5.55894	1.78941	-
AT3G44460	DPBF2	3.58074	1.83357	-
AT2G23170	GH3.3	-1.91006	-1.63447	-
AT4G38840	0	-1.94372	-5.08908	-
AT1G77690	LAX3	-2.60679	-5.97391	-
AT5G27320	GID1C	3.01027	1.61983	-
AT1G07430	AIP1	3.64963	1.35568	-
AT1G75580	0	-1.08682	-1.99201	-
AT1G06160	ERF094	-2.11038	-2.01228	-
AT1G32640	MYC2	-1.37826	-1.31359	-
AT2G17090	BSK12	-4.49969	-4.29391	-
AT1G70700	JAZ9	-1.20799	-1.20665	-
AT1G78290	SRK2C	1.89472	1.18828	-
AT3G57040	ARR9	-1.36887	-1.33075	-
AT1G68210	APRR6	-5.10221	-4.04103	-
AT4G40010	SRK2F	-1.32234	-1.84754	-
AT4G32280	IAA29	3.59315	3.14978	-
AT1G04240	SHY2	-1.92863	-	-
AT5G18060	SAUR23	-4.15081	-4.96704	-
AT3G63010	GID1B	1.95163	1.86053	-
AT2G41070	EEL	1.71111	1.36366	-
AT1G34170	ARF13	-6.13606	-6.93873	-
AT4G04402|	-	-	-	-
AT5G17490	RGL3	1.93858	1.33671	-
AT5G65670	IAA9	-1.06559	-1.13495	-
AT4G03400	DFL2	1.06638	1.45293	-
AT3G20220	0	-4.345	-3.13002	-
AT1G59940	ARR3	-6.67584	-4.07702	-
AT2G01760	ARR14	-1.36668	-1.55821	-
AT3G04730	IAA16	-1.52385	-1.50009	-
AT1G51950	IAA18	-1.39634	-1.2671	-
AT3G23050	IAA7	-1.92165	-1.62942	-
AT5G07210	ARR21	1.72376	2.01911	-
AT5G19710	0	-1.20927	-1.89116	-
AT4G34000	ABF3	-1.38284	-1.28663	-
