# Supplementary material for: Transcriptome characteristics during cell wall formation of endosperm cellularization and embryo differentiation in Arabidopsis
Source: Front Plant Sci. 2022 Oct 3;13:998664. doi: 10.3389/fpls.2022.998664 (PMC9575994; doi:10.3389/fpls.2022.998664)
Supplement: Supplementary file 20 [file Table_14.xlsx]

## Sheet: 5M vs 3W up
Table S10. UP-regulated transcription factors at 5M vs 3W in WT and naa15.
Gene_ID	Log2FC (M5/W3)	Pvalue	Gene name	Gene description
AT5G17800	4.86043	0	MYB56	MYB family
AT1G48000	4.34824	0.00305004	MYB112
AT5G49330	4.30303	0.0256465	MYB111
AT2G32460	4.2248	4.48e-123	MYB101
AT5G40360	3.5203	9.32e-43	MYB115
AT5G59780	2.97737	8.7e-17	MYB59
AT1G35515	2.61243	1.08e-14	MYB8
AT4G26930	2.56228	0.020103	MYB97
AT5G11510	2.13	1.59e-50	MYB3R4
AT3G27785	2.1105	4.19e-75	MYB118
AT3G55730	1.85374	1.43e-66	MYB109
AT5G10280	1.84844	0.00977421	MYB92
AT3G11440	1.36806	9.04e-13	MYB65
AT3G12820	1.30764	1.07e-15	MYB10
AT5G06100	1.1061	1.37e-18	MYB33
AT3G62610	1.10603	1.04e-30	MYB11
AT1G30650	4.32051	0.0156696	WRKY14	WRKY family
AT5G52830	3.92388	4.69e-26	WRKY27
AT2G30590	2.9713	4.83e-213	WRKY21
AT5G56270	1.11771	3.79e-13	WRKY2
AT2G23320	1.08989	3.67e-13	WRKY15
AT2G45050	2.70382	9.3e-07	GATA2	GATA family
AT3G54810	2.20961	1.56e-62	GATA8
AT3G20750	1.98443	8.61e-71	GATA29
AT3G51080	1.01714	8.55e-16	GATA6
AT1G49770	1.52835	7.79e-44	bHLH95	bHLH family
AT4G09180	1.11421	9.9e-12	bHLH81
AT1G51140	1.07967	1.75e-10	bHLH122
AT5G09460	1.00485	2.14e-07	bHLH143
AT1G71520	4.10582	0.0146881	ERF020	ERF family
AT1G44830	2.99617	1.37e-25	ERF014
AT5G25190	2.65826	0.0345453	ERF003
AT1G36060	1.53241	1.15e-15	ERF055
AT4G28140	1.13111	0.000147857	ERF054
AT3G04070	2.07715	1.44e-12	NAC047	NAC family
AT3G15510	1.1497	6.66e-15	NAC056

## Sheet: 5M vs 3W  down
Table S10. Down-regulated transcription factors at 5M vs 3W in WT and naa15.
Gene_ID	Log2FC (M5/W3)	Pvalue	Gene name	Gene description
AT5G50010	-5.3801	2.17e-11	bHLH145	bHLH family
AT3G21330	-4.12411	6.61e-05	bHLH87
AT3G05800	-3.4294	7.94e-08	bHLH150
AT5G46690	-2.75634	0.000111655	bHLH71
AT2G31730	-2.75092	1.61e-13	bHLH154
AT5G65640	-2.64141	3.91e-14	bHLH93
AT3G61950	-2.18954	1.1e-25	bHLH67
AT3G22100	-2.17107	0.00353739	bHLH117
AT3G57800	-2.14046	3.16e-82	bHLH60
AT3G25710	-2.10797	5.07e-05	bHLH32
AT1G72210	-1.96855	0.000122421	bHLH96
AT2G46810	-1.7199	1.37e-57	bHLH70
AT4G00870	-1.69411	4.31e-55	bHLH14
AT3G07340	-1.56466	2.61e-26	bHLH62
AT2G31220	-1.53827	0.0124629	bHLH10
AT2G41130	-1.4795	2.47e-07	bHLH106
AT3G20640	-1.31225	2.23e-11	bHLH123
AT2G42300	-1.21246	1.78e-23	bHLH48
AT1G63910	-4.43478	0.0496332	MYB103	MYB family
AT5G11050	-3.83975	0.0217694	MYB64
AT3G61250	-3.37126	7.67e-120	MYB17
AT3G13890	-2.92159	3.45e-48	MYB26
AT5G16600	-2.61734	3.08e-19	MYB43
AT1G68320	-2.12337	1.6e-06	MYB62
AT5G62470	-1.31652	2.25e-34	MYB96
AT4G09460	-1.09736	4.79e-12	MYB6
AT1G55600	-4.56104	1.2e-29	WRKY10	WRKY family
AT1G80840	-3.90998	2.9e-217	WRKY40
AT2G46400	-1.64305	6.49e-26	WRKY46
AT4G18170	-1.36487	0.0308265	WRKY28
AT2G37260	-1.00435	8.42e-26	WRKY44
AT1G77200	-4.13471	6.34e-09	ERF037	ERF family
AT3G60490	-3.61535	0.0398356	ERF035
AT1G77640	-2.99744	3.14e-39	ERF013
AT2G44840	-2.38113	1.79e-06	ERF13
AT4G17490	-2.19716	8.16e-23	ERF6
AT5G51190	-2.1884	8.94e-32	ERF105
AT1G28360	-2.1608	7.28e-06	ERF12
AT1G06160	-2.11038	0.0152514	ERF094
AT2G44940	-1.48149	1.81e-10	ERF034
AT5G61600	-1.46734	1.21e-24	ERF104
AT1G01250	-1.45608	0.0320531	ERF023
AT4G17500	-1.43118	1.04e-05	ERF1A
AT1G74930	-1.29038	0.000103669	ERF018
AT4G16750	-1.28156	0.0372566	ERF039
AT5G07580	-1.09033	3.55e-10	ERF106
AT3G15210	-1.0835	3.22e-16	ERF4
AT3G20310	-1.0133	7.35e-30	ERF7
AT4G32890	-2.51929	1.98e-09	GATA9	GATA family
AT3G50870	-2.26275	3.91e-08	GATA18
AT3G06740	-1.31319	8.18e-12	GATA15
AT4G17880	-1.8905	4.7e-07	MYC4	MYC
AT4G37730	-2.52596	4.64e-10	bZIP7	bZIP

## Sheet: 6M vs 4W up
Table S10. UP-regulated transcription factors at 6M vs 4W in WT and naa15.
Gene_ID	Log2FC (M6/W4)	Pvalue	Gene name	Gene description
AT1G48000	4.58976	0.00156484	MYB112	MYB family
AT5G17800	2.52519	0	MYB56
AT2G32460	2.27175	1.35e-121	MYB101
AT3G11440	1.84461	1.21e-36	MYB65
AT3G23250	1.82304	0.0123685	MYB15
AT3G55730	1.79131	4.17e-117	MYB109
AT5G60890	1.69951	0.0221498	MYB34
AT5G11510	1.57148	1.17e-135	MYB3R4
AT5G40360	1.45608	4.57e-22	MYB115
AT5G65230	1.31957	8.9e-05	MYB53
AT5G06100	1.31338	1.66e-69	MYB33
AT3G12820	1.01367	8.25e-13	MYB10
AT5G07100	4.69554	0.00106241	WRKY26	WRKY family
AT1G30650	3.64598	0.000728092	WRKY14
AT5G52830	2.25112	7.69e-28	WRKY27
AT2G30250	1.84701	2.96e-06	WRKY25
AT2G30590	1.60662	3.44e-246	WRKY21
AT5G56270	1.01703	1.1e-22	WRKY2
AT4G28811	5.50361	0.000201435	bHLH119	bHLH family
AT2G31210	3.25479	0.0192193	bHLH91
AT4G09180	1.48827	3.02e-30	bHLH81
AT1G49770	1.26181	3.98e-58	bHLH95
AT3G50260	2.87243	0.00045908	ERF011	ERF family
AT1G36060	1.78389	9.34e-76	ERF055
AT4G28140	1.76285	3.7e-11	ERF054

## Sheet: 6M vs  4W down
Table S10. Down-regulated transcription factors at 6M vs 4W in WT and naa15.
Gene_ID	Log2 FC (M6/W4)	Pvalue	Gene name	Gene description
AT1G63910	-4.39065	0.016668	MYB103	MYB family
AT3G13890	-4.05563	5.2e-49	MYB26
AT3G61250	-4.05112	7.24e-76	MYB17
AT5G16600	-3.66041	2.52e-17	MYB43
AT1G18710	-2.65314	6.18e-13	MYB47
AT1G68320	-2.29881	8.74e-06	MYB62
AT5G62470	-1.83999	1.32e-177	MYB96
AT4G09460	-1.41504	1.03e-17	MYB6
AT5G26660	-1.39507	0.0161313	MYB86
AT2G47460	-1.34427	2.54e-27	MYB12
AT5G46830	-4.24056	0.00610976	bHLH28	bHLH family
AT5G50010	-4.10434	3.8e-08	bHLH145
AT3G61950	-2.92569	2.24e-28	bHLH67
AT4G00870	-2.86629	2.05e-94	bHLH14
AT5G50915	-2.68102	0.000171966	bHLH137
AT2G41130	-2.4646	4.53e-10	bHLH106
AT3G21330	-2.41138	0.0120165	bHLH87
AT2G31730	-2.1857	3.28e-09	bHLH154
AT4G01460	-2.1345	0.00123912	bHLH57
AT3G25710	-2.07902	1.17e-05	bHLH32
AT3G57800	-1.98081	4.09e-52	bHLH60
AT2G46810	-1.93869	5.91e-76	bHLH70
AT1G72210	-1.93241	3.21e-05	bHLH96
AT2G31220	-1.78063	0.0051393	bHLH10
AT5G65640	-1.75167	2.22e-05	bHLH93
AT5G48560	-1.68982	1.59e-08	bHLH78
AT1G64625	-1.45499	0.000354639	bHLH157
AT3G05800	-1.43759	0.00234703	bHLH150
AT3G07340	-1.38679	1.04e-20	bHLH62
AT3G60490	-3.94222	0.0026712	ERF035	ERF family
AT1G77200	-2.93021	1.68e-05	ERF037
AT2G31230	-2.78194	0.0110052	ERF15
AT1G77640	-2.68436	2.5e-25	ERF013
AT2G44940	-2.57463	1.41e-20	ERF034
AT5G21960	-2.42201	4.35e-06	ERF016
AT1G28360	-2.10611	1.09e-11	ERF12
AT1G06160	-2.01228	0.0204353	ERF094
AT1G12890	-1.99562	3.67e-11	ERF088
AT4G16750	-1.6182	0.0098745	ERF039
AT4G17500	-1.25331	3.32e-06	ERF1A
AT1G74930	-1.24895	1.13e-10	ERF018
AT4G32800	-1.07222	0.0234663	ERF043
AT5G67190	-1.06253	2.62e-10	ERF010
AT2G46130	-2.38546	0.0246577	WRKY43	WRKY family
AT1G80840	-2.20863	1.14e-118	WRKY40
AT1G55600	-1.90022	0.00216419	WRKY10
AT4G18170	-1.58738	0.00276618	WRKY28
AT4G37730	-2.75573	1.54e-09	bZIP7	bZIP family
AT4G34590	-1.02321	5.54e-85	bZIP11

## Sheet: 7M vs  5W up
Table S10. UP-regulated transcription factors at 7M vs 5W in WT and naa15.
Gene_ID	Log2FC (M7/W5)	Pvalue	Gene name	Gene description
AT1G18570	5.71509	8.67056e-05	MYB51	MYB family
AT4G26930	4.5355	0.0024513	MYB97
AT5G55020	4.11291	0.0309124	MYB120
AT1G17950	3.2402	0.0206447	MYB52
AT3G12820	1.93151	4.66411e-38	MYB10
AT3G55730	1.55561	1.12898e-118	MYB109
AT5G17800	1.55436	0	MYB56
AT3G11440	1.20295	1.24486e-26	MYB65
AT5G06100	1.03173	2.69126e-60	MYB33
AT5G07310	4.5832	0.00881817	ERF115	ERF family
AT2G47520	2.4885	0.00136368	ERF071
AT5G61600	1.89492	4.80277e-50	ERF104
AT5G41570	7.1418	3.62203e-08	WRKY24	WRKY family
AT1G30650	4.87009	3.76232e-05	WRKY14
AT1G55600	4.75253	0.000940202	WRKY10
AT2G46130	3.57632	2.47168e-05	WRKY43
AT2G30250	2.2316	2.27527e-06	WRKY25
AT2G34820	5.69424	0.000107692	bHLH53	bHLH family
AT2G31210	3.01209	0.0113282	bHLH91
AT4G28811	2.92903	4.57076e-05	bHLH119
AT1G49770	1.54106	1.91824e-92	bHLH95
AT3G47640	1.22265	4.58132e-23	bHLH47

## Sheet: 7M vs 5W down
Supplementary Table 14 | Down-regulated transcriptor factors in naa15 and WT of Arabidopsis
Gene_ID	Log2 fold change (M7/W5)	Pvalue	Gene name	Gene description
AT2G31180	-4.50967	0.00296297	MYB14	MYB family
AT1G06180	-4.4109	2.34319e-31	MYB13
AT1G63910	-4.10616	0.0338221	MYB103
AT1G18710	-3.37631	1.10597e-12	MYB47
AT5G49330	-3.27423	1.80911e-09	MYB111
AT5G62470	-2.68811	3.28485e-283	MYB96
AT3G61250	-2.38251	4.35779e-15	MYB17
AT1G16490	-2.16038	0.00130349	MYB58
AT3G13890	-1.9506	2.54708e-07	MYB26
AT5G10280	-1.82804	1.28113e-05	MYB92
AT2G47460	-1.51406	1.75961e-29	MYB12
AT3G47600	-1.08404	4.64625e-41	MYB94
AT4G34990	-1.06455	1.48452e-24	MYB32
AT1G77200	-4.16643	5.51257e-11	ERF037	ERF family
AT1G28360	-4.00857	1.45145e-45	ERF12
AT5G21960	-3.37838	0.00119058	ERF016
AT2G44840	-3.37522	4.45831e-24	ERF13
AT1G77640	-2.75515	1.2571e-12	ERF013
AT4G32800	-2.55958	2.74674e-11	ERF043
AT2G44940	-2.20018	1.93974e-10	ERF034
AT5G67190	-2.11826	1.97915e-41	ERF010
AT2G23340	-1.85694	1.74021e-92	ERF008
AT1G12890	-1.7265	2.9296e-07	ERF088
AT1G33760	-1.6484	1.59525e-07	ERF022
AT3G15210	-1.64519	8.58049e-245	ERF4
AT3G50260	-1.59812	0.00754927	ERF011
AT4G17490	-1.54369	2.74326e-18	ERF6
AT4G28140	-1.52429	1.52686e-15	ERF054
AT1G74930	-1.50033	3.05497e-08	ERF018
AT4G31060	-1.31413	7.9442e-23	ERF015
AT4G34410	-1.2491	4.30883e-31	ERF109
AT5G44210	-1.23555	5.03624e-12	ERF9
AT1G64380	-1.10832	2.44547e-09	ERF061
AT1G19210	-1.08794	1.5118e-06	ERF017
AT3G25890	-1.03402	2.30536e-23	ERF119
AT1G71450	-1.0264	0.00731526	ERF021
AT4G37730	-1.26559	0.018877	bZIP7	bZIP family
AT4G34590	-1.22603	4.63208e-188	bZIP11
AT4G18170	-2.35675	2.80699e-05	WRKY28	WRKY family
AT1G80840	-1.69176	2.4654e-19	WRKY40
AT2G37260	-1.23807	3.60754e-79	WRKY44
AT2G24570	-1.08185	9.25019e-20	WRKY17
AT3G05800	-5.92937	8.44979e-33	bHLH150	bHLH family
AT5G10570	-5.01983	0.000379183	bHLH61
AT5G50010	-4.51101	9.67945e-12	bHLH145
AT1G72210	-4.36974	2.58924e-37	bHLH96
AT1G06170	-4.1991	7.61049e-05	bHLH89
AT4G01460	-3.58094	1.4538e-14	bHLH57
AT3G61950	-3.29853	1.88453e-22	bHLH67
AT4G00870	-3.06856	1.09495e-50	bHLH14
AT3G21330	-2.7688	0.0118275	bHLH87
AT3G25710	-2.66324	2.30984e-09	bHLH32
AT2G31220	-2.54098	1.95001e-09	bHLH10
AT1G64625	-2.24922	6.6401e-10	bHLH157
AT5G46690	-1.78219	0.00359561	bHLH71
AT5G65640	-1.70886	1.07443e-05	bHLH93
AT1G27660	-1.27592	0.000836673	bHLH110
AT2G31730	-1.22129	0.000488201	bHLH154
AT1G05805	-1.20788	2.52943e-18	bHLH128
AT1G09250	-1.19162	0.00021704	bHLH149
AT3G57800	-1.18547	1.38753e-12	bHLH60
AT1G68810	-1.17953	8.24135e-08	bHLH30
AT2G46810	-1.04312	1.3898e-14	bHLH70
