# Supplementary material for: Transcriptome characteristics during cell wall formation of endosperm cellularization and embryo differentiation in Arabidopsis
Source: Front Plant Sci. 2022 Oct 3;13:998664. doi: 10.3389/fpls.2022.998664 (PMC9575994; doi:10.3389/fpls.2022.998664)
Supplement: Supplementary file 21 [file Table_15.xlsx]

## Sheet: Sheet1
Supplementary Table 15 | Identification of differentially expressed genes involved in embryogenesis of naa15 in Arabidopsis
Gene_ID	Family	Biological Function	Log2 fold change (5M/3W)	Log2 fold change (6M/3W)	Log2 fold change (7M/3W)
AT3G63530	EOD1	A novel E3 ubiquitin ligase, regulates seed size	-1.34877	-1.55807	-2.03525
AT3G18010	WOX1	Together with WOX2 regulate apical pattern_x0002_ing and establishment of SAM	-	4.1926	-
AT5G59340	WOX2	Controls apical fate; development of SAM	-1.19606	-1.40644	-1.21958
AT3G11260	WOX5	Together with WOX2 regulate apical patterning and establishment of SAM	-1.8156	-1.83363	-1.2427
AT5G45980	WOX8	Zygotic polarity; controls basal cell lineage	-1.07922	-1.17461	-1.52456
AT5G56270	WRKY2	Establishment of zygotic polarity	1.11771	-	-
AT3G20840	PLT1	Regulate quiescent center (QC) specification and stem cell activity	-2.36044	-2.28443	-1.78076
AT4G37650	SHR	quiescent center (QC) identity and stem cells maintenance	-1.93507	-1.98897	-2.54678
AT3G57670	NTT	Act downstream of ARF5 for quiescent center (QC) specifcation	-1.12473	-1.44446	-
AT3G25710	TMO5	Act downstream of ARF5 and control hypophysis specifcation	-2.10797	-1.8735	-1.92842
AT4G36920	AP2	increase embryo cell size and number	-	-1.53631	-1.58834
AT1G19850	MP/ARF5	Embryonic root formation; vascular tissue establishment and maintenance; ground tissue initiation	-1.1	-1.1945	-1.11309
AT4G32880	ATHB8	SAM initiation and establishment of bilateral symmetry	-1.78014	-1.78684	-2.04744
AT2G44910	ATHB4	Establishment of bilateral symmetry	-	-	-1.00095
AT4G16780	ATHB2	Establishment of bilateral symmetry	3.11762	3.76247	3.59157
AT1G12980	DRN/DRNL	Interact with HD-ZIP III TFs and regulate cell patterning and cotyledon development	-	-1.35201	-2.09202
AT5G53950	CUC2	Cotyledon boundary formation; act synergis_x0002_tically with STM to control SAM formation	-2.28054	-2.35364	-2.41724
AT1G76420	CUC3	Cotyledon boundary formation; act synergis_x0002_tically with STM to control SAM formation	-1.55762	-	-1.48851
AT1G19270	DA1	A ubiquitin-activated peptidase,together with CUC2/CUC3-UBP15 controls the initiation of axillary meristems	-	1.1595	1.28362
At4G03190	AFB1	Responsed to auxin during embryo development	-1.09579	-1.44824	-1.2915
AT1G68810	T5L	Expressed during late globular and early heart stage	-	-1.03739	-1.33326
AT2G45190	FIL	Establishment of abaxial patterning	-1.00483	-1.66288	-1.37848
AT1G08465	YABBY2	Establishment of abaxial patterning	-2.87292	-2.06595	-3.07457
AT4G00180	YABBY3	Establishment of abaxial patterning	2.29487	3.29571	2.80215
AT5G60690	REV	Establishment of abaxial patterning	1.41035	2.05925	2.18698
AT3G49240	EMB1796	Cell/nuclear proliferation in early Arabidopsis embryo and endosperm	1.37954	-	-
AT1G64220	TOM7-2	Translocase of outer membrane	1.39759	-	-
AT1G21970	LEC1	Embryonic fate; regulates storage protein and lipid accumula_x0002_tion; act as a molecular signal between endosperm and embryo; embryo maturation; desiccation tolerance	1.43563	1.72246	1.73541
AT2G01830	WOL	Expressed during embryogenesis in globular and heart stage	-	1.27953	1.34428
AT1G28300	LEC2	positively regulate the accumulation of seed storage reserves; embryonic fate; embryo maturation; seed dormancy; acquisition of desiccation tolerance	1.94205	-	1.73085
AT5G43810	AGO10	Required to establish the central-peripheral organization of the embryo apex	1.29887	1.725	1.82243
AT3G45610	DOF6	Expressed during embryogenesis in globular stage	2.96841	4.36315	4.66943
